# Supplementary material for: Quantifying biological carbon pump pathways with a data-constrained mechanistic model ensemble approach
Source: Copernicus journal article supplement (doi:10.5194/bg-2022-7), 2022-02-07
Supplement: Supplementary file 1 [file Supp Table 1.xlsx]

## Sheet: Sheet1
Parameter Name	Description	Units	Initial Guess	Lower Bound	Upper Bound	Log transformed	Mean Value	Standard Deviation	95% C.I.
TLIM	Temperature Dependence	°C-1	0.0693	0.0693	0.0693	Yes	0.0693	-	-
Vmax,SP	Max Growth Rate (PS)	d-1	0.4	0.1	1	No	0.37	0.11	0.22 - 0.64
kNO,SP	Nitrate Half-saturation Constant (PS)	mmol N m-3	0.5	0.01	k_NO_lp	Yes	0.25	0.38	0.011 - 1.3
kNH,SP	Ammonium Half-saturation Constant (PS)	mmol N m-3	0.1	0.001	k_NH_lp	Yes	0.0027	0.0014	0.0011 - 0.0065
αSP	Alpha (Slope of P-I Curve)	m2 W-1 d-1	0.003	0.0005	0.02	Yes	0.017	0.0026	0.011 - 0.02
βSP	Beta (Photoinhibition parameter)	m2 W-1 d-1	0.00045	1e-05	0.001	Yes	0.00012	0.00017	0.000011 - 0.00071
ResSP	Respiration (PS)	d-1	0.03	0	0.1	No	0.0052	0.0051	0.00014 - 0.019
MortSP	Mortality (PS)	d-1	0.002	0	0.1	No	0.016	0.014	0.00061 - 0.054
ExcSP	Excretion (PS)	unitless	0.135	0	0.3	No	0.27	0.027	0.2 - 0.3
InhNH,NO,SP	ammonium inhibition of nitrate uptake (SP)	m3 mmol N-1	1.4	0	2	No	0.64	0.65	0.0026 - 1.9
Vmax,LP	Max Growth Rate (PL)	d-1	0.8	0.1	1	No	0.72	0.16	0.43 - 0.99
kNO,LP	Nitrate Half-saturation Constant (PL)	mmol N m-3	3	k_NO_sp	10	Yes	1.6	1.9	0.023 - 7
kNH,LP	Ammonium Half-saturation Constant (PL)	mmol N m-3	0.3	k_NH_sp	1	Yes	0.0035	0.002	0.0013 - 0.0089
kSI,LP	Silica half-saturation constant (PL)	mmol N m-3	6	0.1	10	Yes	0.16	0.06	0.1 - 0.31
αLP	Alpha (Slope of P-I Curve)	m2 W-1 d-1	0.006	0.001	0.04	Yes	0.016	0.0049	0.0077 - 0.028
βLP	Beta (Photoinhibition parameter)	m2 W-1 d-1	0.00045	1e-05	0.001	Yes	0.0003	0.00028	0.000014 - 0.00093
ResLP	Respiration (PL)	d-1	0.03	0.01	0.1	Yes	0.021	0.011	0.01 - 0.051
MortLP	Mortality (PL)	d-1	0.001	0.0005	0.1	Yes	0.0033	0.0035	0.00053 - 0.013
ExcLP	Excretion (PL)	unitless	0.135	0.01	0.3	Yes	0.047	0.046	0.01 - 0.18
InhNH,NO,LP	ammonium inhibition of nitrate uptake (LP)	m3 mmol N-1	1.4	0	2	No	1.1	0.55	0.12 - 2
gmax,SZ,SP	Max Grazing Rate ZS on PS	d-1	0.6	0.3	3	Yes	0.97	0.43	0.43 - 2.2
gmax,SZ,LP	Max Grazing Rate ZS on PL	d-1	0.6	0.1	1	Yes	0.27	0.18	0.1 - 0.82
ivSZ,SP	Ivlev Constant (SP)	m3 mmol N-1	1.4	0.05	10	Yes	1.5	1.1	0.25 - 4
ivSZ,LP	Ivlev Constant (LP)	m3 mmol N-1	1.4	0.05	10	Yes	5.8	2.6	0.96 - 9.8
threshSZ,SP	Feeding Threshold on PS	mmol N m-3	0.04	0	0.1	No	0.069	0.023	0.013 - 0.099
threshSZ,LP	Feeding Threshold on PL	mmol N m-3	0.04	0	0.1	No	0.0087	0.0099	0.00024 - 0.038
mortSZ	Mortality (ZS)	d-1	0.022	0	0.1	No	0.042	0.026	0.0028 - 0.094
AESZ	Assimilation Efficiency (ZS)	unitless	0.7	0.5	0.9	No	0.57	0.071	0.5 - 0.79
GGESZ	GGE (ZS)	unitless	0.3	0.25	0.35	No	0.31	0.028	0.25 - 0.35
gmax,LZRES,SP	Max Grazing Rate lzres on PS	d-1	0.1	0.01	0.3	Yes	0.15	0.072	0.038 - 0.29
gmax,LZRES,LP	Max Grazing Rate lzres on PL	d-1	0.3	0.1	1	Yes	0.31	0.2	0.1 - 0.84
gmax,LZRES,SZ	Max Grazing Rate lzres on ZS	d-1	0.3	0.1	1	Yes	0.38	0.25	0.1 - 0.94
ivLZRES,SP	Ivlev Constant	m3 mmol N-1	1.4	0.1	10	Yes	4.2	2.4	0.65 - 9.4
ivLZRES,LP	Ivlev Constant	m3 mmol N-1	1.4	0.1	10	Yes	0.52	0.55	0.1 - 2.1
ivLZRES,SZ	Ivlev Constant	m3 mmol N-1	1.4	0.1	10	Yes	1.5	1.7	0.13 - 6.7
AELZRES	Assimilation efficiency (lzres)	unitless	0.7	0.5	0.9	No	0.73	0.12	0.51 - 0.89
actres,LZRES	Active Respiration (lzres)	unitless	0.1	0.01	0.3	Yes	0.091	0.076	0.011 - 0.27
mortday,LZRES	Daytime mortality of lzres	m3 mmol N-1 d-1	0.1	0	0.5	No	0.2	0.14	0.006 - 0.48
threshLZRES,SP	Feeding Threshold (LZ on SP)	mmol N m-3	0.043	0	0.1	No	0.047	0.027	0.0033 - 0.096
threshLZRES,LP	Feeding Threshold (LZ on LP)	mmol N m-3	0.043	0	0.1	No	0.064	0.029	0.0067 - 0.099
threshLZRES,SZ	Feeding Threshold (LZ on SZ)	mmol N m-3	0.043	0	0.1	No	0.053	0.028	0.0036 - 0.097
mortnight,LZ	Nighttime Mortality Parameter for LZ	m3 mmol N-1 d-1	0.1	0	0.2	No	0.095	0.054	0.0056 - 0.19
Ika2	Temperature Parameter from Ikeda (1985)	°C-1	0.0656	0.05	0.08	No	0.066	1.7e-15	0.066 - 0.066
IkLZ	Individual Biomass Parameter from Ikeda (1985)	d-1	0.0296	0.02	0.08	No	0.042	0.016	0.021 - 0.075
gmax,LZDVM,SP	Max Grazing Rate lzdvm on PS	d-1	0.2	0.01	0.3	Yes	0.13	0.079	0.013 - 0.29
gmax,LZDVM,LP	Max Grazing Rate lzdvm on PL	d-1	0.6	0.1	1	Yes	0.34	0.21	0.11 - 0.88
gmax,LZDVM,SZ	Max Grazing Rate lzdvm on ZS	d-1	0.6	0.1	1	Yes	0.45	0.26	0.11 - 0.96
ivLZDVM,SP	Ivlev Constant	m3 mmol N-1	1.4	0.1	10	Yes	2.1	2.4	0.11 - 8.7
ivLZDVM,LP	Ivlev Constant	m3 mmol N-1	1.4	0.1	10	Yes	2.4	2.7	0.11 - 9.1
ivLZDVM,SZ	Ivlev Constant	m3 mmol N-1	1.4	0.1	10	Yes	1.9	2.1	0.12 - 8
AELZDVM	Assimilation efficiency (lzdvm)	unitless	0.7	0.5	0.9	No	0.69	0.11	0.51 - 0.89
actres,LZDVM	Active Respiration (lzdvm)	unitless	0.1	0.01	0.3	Yes	0.077	0.074	0.011 - 0.27
mortday,LZDVM	Daytime mortality of lzdvm	m3 mmol N-1 d-1	0.1	0	0.5	No	0.24	0.15	0.012 - 0.49
gmax,PZRES,SP	Max Grazing Rate pzres on PS	d-1	0.1	0.01	0.3	Yes	0.079	0.075	0.011 - 0.27
gmax,PZRES,LP	Max Grazing Rate pzres on PL	d-1	0.1	0.05	1	Yes	0.28	0.23	0.053 - 0.88
gmax,PZRES,SZ	Max Grazing Rate pzres on ZS	d-1	0.1	0.05	1	Yes	0.27	0.23	0.054 - 0.88
gmax,PZRES,LZ	Max Grazing Rate pzres on ZL	d-1	0.3	0.05	1	Yes	0.38	0.25	0.057 - 0.93
ivPZRES,SP	Ivlev Constant	m3 mmol N-1	1.4	0.1	10	Yes	3.1	3	0.11 - 9.5
ivPZRES,LP	Ivlev Constant	m3 mmol N-1	1.4	0.1	10	Yes	0.86	1.5	0.11 - 6.2
ivPZRES,SZ	Ivlev Constant	m3 mmol N-1	1.4	0.1	10	Yes	2.3	2.5	0.11 - 8.8
ivPZRES,LZ	Ivlev Constant	m3 mmol N-1	1.4	0.1	10	Yes	1.1	1.8	0.11 - 7.4
AEPZRES	Assimilation efficiency (pzres)	unitless	0.7	0.5	0.9	No	0.72	0.11	0.52 - 0.89
actres,PZRES	Active Respiration (pzres)	unitless	0.1	0.01	0.3	Yes	0.067	0.059	0.011 - 0.23
mortday,PZRES	Daytime mortality of pzres	m3 mmol N-1 d-1	0.05	0	0.5	No	0.24	0.13	0.017 - 0.48
inhSZLZLP,SP	grazing on SP inhibited by LP, SZ, LZ	m3 mmol N-1	4.605	0	10	No	4.5	2.8	0.22 - 9.7
inhSZLZ,LP	grazing on large phytoplankton inhibition by small and large zooplankton	m3 mmol N-1	4.605	0	10	No	6.8	2.4	1.7 - 9.9
inhLZ,SZ	grazing on small zooplankton inhibition by large zooplankton	m3 mmol N-1	3.01	0	10	No	6.2	2.5	0.87 - 9.8
threshPZRES,SP	Feeding Threshold (pz on SP)	mmol N m-3	0.043	0	0.1	No	0.051	0.029	0.0034 - 0.098
threshPZRES,LP	Feeding Threshold (pz on LP)	mmol N m-3	0.043	0	0.1	No	0.047	0.028	0.0023 - 0.097
threshPZRES,SZ	Feeding Threshold (pz on SZ)	mmol N m-3	0.043	0	0.1	No	0.04	0.03	0.0016 - 0.096
threshPZRES,LZ	Feeding Threshold (pz on LZ)	mmol N m-3	0.043	0	0.1	No	0.068	0.023	0.012 - 0.099
mortnight,PZRES	Nighttime Mortality Parameter for pz	mmol N-1 d-1	0.1	0	0.5	No	0.19	0.14	0.0071 - 0.47
IkPZ	Individual Biomass Parameter from Ikeda (1985)	d-1	0.0173	0.01	0.05	No	0.017	0.0067	0.01 - 0.035
gmax,PZDVM,SP	Max Grazing Rate pzdvm on PS	d-1	0.2	0.01	0.3	Yes	0.097	0.082	0.011 - 0.28
gmax,PZDVM,LP	Max Grazing Rate pzdvm on PL	d-1	0.2	0.05	1	Yes	0.35	0.27	0.055 - 0.95
gmax,PZDVM,SZ	Max Grazing Rate pzdvm on ZS	d-1	0.2	0.05	1	Yes	0.4	0.27	0.057 - 0.94
gmax,PZDVM,LZ	Max Grazing Rate pzdvm on ZL	d-1	0.6	0.05	1	Yes	0.32	0.26	0.054 - 0.93
ivPZDVM,SP	Ivlev Constant	m3 mmol N-1	1.4	0.1	10	Yes	1.4	2.1	0.11 - 8.1
ivPZDVM,LP	Ivlev Constant	m3 mmol N-1	1.4	0.1	10	Yes	1.4	2	0.11 - 7.9
ivPZDVM,SZ	Ivlev Constant	m3 mmol N-1	1.4	0.1	10	Yes	3.2	2.7	0.14 - 9.3
ivPZDVM,LZ	Ivlev Constant	m3 mmol N-1	1.4	0.1	10	Yes	2.4	2.6	0.11 - 9
AEPZDVM	Assimilation efficiency (pzdvm)	unitless	0.7	0.5	0.9	No	0.7	0.11	0.51 - 0.89
actres,PZDVM	Active Respiration (pzdvm)	d-1	0.1	0.01	0.3	Yes	0.057	0.063	0.01 - 0.24
mortday,PZDVM	Daytime mortality of pzdvm	m3 mmol N-1 d-1	0.1	0	0.5	No	0.27	0.14	0.019 - 0.49
refnitr	Nitrification	d-1	0.003	0.001	1	Yes	0.21	0.27	0.0012 - 0.91
refdec,PON,NH	Decomposition: PON==>NH4	d-1	0.01	0.005	0.5	Yes	0.024	0.037	0.0052 - 0.13
refdec,PON,DON	Decomposition: PON==>DON	d-1	0.05	0.005	0.5	Yes	0.24	0.16	0.011 - 0.49
refdec,LPON,DON	Aggregation: LPON==>DON	m3 mmol N-1 d-1	0.05	0.005	0.5	Yes	0.047	0.077	0.0053 - 0.32
refdec,LPON,NH	Decomposition: LPON==>NH4	d-1	0.01	0.005	0.5	Yes	0.027	0.034	0.0053 - 0.11
refdec,LPON,DON	Decomposition: LPON==>DON	d-1	0.05	0.005	0.5	Yes	0.24	0.16	0.0072 - 0.49
refdec,DON,NH	Decomposition: DON==>NH4	d-1	0.01	0.005	0.3	Yes	0.0063	0.0013	0.005 - 0.0098
fDON,DONref	Fraction of DON to refractory DON	unitless	0.01	0.001	0.3	Yes	0.096	0.099	0.0012 - 0.29
refdec,DONref,NH	Decomposition: DONref==>NH4	d-1	1e-06	1e-06	0.001	Yes	6.1e-05	0.00011	0.0000012 - 0.00038
refdec,OP,Si	Decompostion: Opal==>Si	d-1	0.01	0.001	0.1	Yes	0.056	0.023	0.02 - 0.097
sink	Sinking Speed (small detritus)	m d-1	2	0.5	10	Yes	0.88	0.41	0.51 - 2.1
Lsink	Sinking Speed (large detritus)	m d-1	100	10	500	Yes	52	88	10 - 390
koxy,mic	Oxygen limitation half saturation for microbes (heterotrophic protists + implicit bacteria)		100	50	200	No	130	44	53 - 200
koxy,met	Oxygen limitation half saturation for metazoans		20	5	40	No	23	9.8	5.9 - 39
Chl2CSP,min	Minimum Chl:C ratio for SP		0.002	0.001	0.01	No	0.0054	0.0022	0.0014 - 0.0094
Chl2CLP,min	Minimum Chl:C ratio for LP		0.005	0.001	0.01	No	0.0054	0.0026	0.0013 - 0.0098
Chl2CSP,max	Maximum Chl:C ratio for SP		0.03	0.005	0.2	No	0.0072	0.0018	0.0051 - 0.012
Chl2CLP,max	Maximum Chl:C ratio for LP		0.065	0.005	0.2	No	0.18	0.016	0.14 - 0.2
extchl	Light absorption by Chl		0.05	0.04	0.06	No	0.054	0.0042	0.044 - 0.06
