# Supplementary material for: Quantifying biological carbon pump pathways with a data-constrained mechanistic model ensemble approach
Source: Copernicus journal article supplement (doi:10.5194/bg-2022-7), 2022-02-07
Supplement: Supplementary file 2 [file Supp Table 2.xlsx]

## Sheet: Sheet1
Region	Cruise	Cycle	Depth	Non-diatom phytoplankton biomass (SP)	uncertainty	Diatom biomass (LP	uncertainty	Protistan zooplankton biomass (SZ)	uncertainty	Nitrate	uncertainty	Ammonium	uncertainty	Particulate organic nitrogen	uncertainty	Dissolved organic nitrogen	uncertainty	Silicic acid	uncertainty	Biogenic silica	uncertainty	Chlorophyll a	uncertainty	Net primary production	uncertainty	Bulk phytoplankton growth rate (Chlorophyll)	uncertainty	Bulk phytoplankton mortality due to protistan grazing (Chlorophyll)	uncertainty	Non-diatom growth rate	uncertainty	Non-diatom mortality due to protistan grazing	uncertainty	Diatom growth rate	uncertainty	Diatom mortality due to protistan grazing	uncertainty	Nitrate uptake	uncertainty	Silicic acid uptake	uncertainty	Photosynthetically active radiation	uncertainty
			m	mmol N m-3	mmol N m-3	mmol N m-3	mmol N m-3	mmol N m-3	mmol N m-3	mmol N m-3	mmol N m-3	mmol N m-3	mmol N m-3	mmol N m-3	mmol N m-3	mmol N m-3	mmol N m-3	mmol Si m-3	mmol Si m-3	mmol Si m-3	mmol Si m-3	mg Chl m-3	mg Chl m-3	mmol C m-3 d-1	mmol C m-3 d-1	d-1	d-1	d-1	d-1	d-1	d-1	d-1	d-1	d-1	d-1	d-1	d-1	mmol N m-3 d-1	mmol N m-3 d-1	mmol Si m-3 d-1	mmol Si m-3 d-1	Percent surface irradiance	Percent surface irradiance
California Current Ecosystem	605	1	2	1.37115	0.246947	0.582428	0.148923	0.307107	0.0536714	7.77714	1.39865	0.471429	0.0252066	5.21698	0.86365	NaN	NaN	10.81	1.31493	NaN	NaN	5.90857	0.635597	36.0681	9.68566	0.4425	0.102212	0.1	0.1005	NaN	NaN	NaN	NaN	NaN	NaN	NaN	NaN	NaN	NaN	NaN	NaN	0.287941	0.0434117
California Current Ecosystem	605	1	5	1.02035	0.26247	0.459457	0.129474	0.200192	0.0408993	7.78833	1.65681	0.591667	0.0643126	5.58749	1.031	NaN	NaN	11.3333	1.44265	NaN	NaN	5.78667	0.680768	26.1238	3.96377	0.5575	0.102788	0.17	0.10085	NaN	NaN	NaN	NaN	NaN	NaN	NaN	NaN	NaN	NaN	NaN	NaN	0.12863	0.018569
California Current Ecosystem	605	1	8	0.71024	0.152399	0.455358	0.126657	0.64661	0.382758	8.812	0.990625	0.45	0.0484653	5.35302	0.80044	NaN	NaN	11.781	0.918131	NaN	NaN	5.676	0.425243	18.4394	4.49577	0.47	0.10235	-0.0075	0.0999625	NaN	NaN	NaN	NaN	NaN	NaN	NaN	NaN	NaN	NaN	NaN	NaN	0.0615974	0.0088937
California Current Ecosystem	605	1	12	0.931487	0.190173	0.569615	0.240699	0.80762	0.307996	9.50167	1.59592	0.578333	0.111068	5.38539	1.1486	NaN	NaN	12.175	1.46218	NaN	NaN	5.10667	0.731048	8.08344	2.18097	0.5575	0.104193	0.315	0.172168	NaN	NaN	NaN	NaN	NaN	NaN	NaN	NaN	NaN	NaN	NaN	NaN	0.0247286	0.00357215
California Current Ecosystem	605	1	20	1.07906	0.223783	0.456045	0.0667885	0.25606	0.0327418	9.20625	0.94601	0.64375	0.0877484	5.07221	0.926649	NaN	NaN	12.04	0.893055	NaN	NaN	5.35875	0.348776	NaN	NaN	0.245	0.101225	0.1175	0.100587	NaN	NaN	NaN	NaN	NaN	NaN	NaN	NaN	NaN	NaN	NaN	NaN	0.00555164	0.000929221
California Current Ecosystem	605	1	25	0.757666	0.297234	0.408687	0.104675	0.201646	0.063586	11.3033	0.766078	0.735556	0.093335	3.67302	0.776817	NaN	NaN	13.9356	0.686139	NaN	NaN	3.82556	0.333567	0.744228	0.188849	0.225	0.101125	0.135	0.100675	NaN	NaN	NaN	NaN	NaN	NaN	NaN	NaN	NaN	NaN	NaN	NaN	0.00262403	0.000505787
California Current Ecosystem	605	1	30	NaN	NaN	NaN	NaN	NaN	NaN	14.165	0.788358	0.805	0.144712	NaN	NaN	NaN	NaN	16.5175	0.830875	NaN	NaN	2.195	0.230669	NaN	NaN	NaN	NaN	NaN	NaN	NaN	NaN	NaN	NaN	NaN	NaN	NaN	NaN	NaN	NaN	NaN	NaN	0.00130931	0.00024351
California Current Ecosystem	605	1	35	0.283496	0.0553472	0.285031	0.117804	0.0791539	0.00665567	12.572	0.774225	0.806	0.197398	1.894	0.427528	NaN	NaN	15.03	0.789823	NaN	NaN	2.436	0.61548	0.219495	0.0739503	0.03	0.115643	0.113333	0.116124	NaN	NaN	NaN	NaN	NaN	NaN	NaN	NaN	NaN	NaN	NaN	NaN	0.000709208	0.000133637
California Current Ecosystem	605	1	40	NaN	NaN	NaN	NaN	NaN	NaN	16.8625	1.78327	0.5975	0.117074	NaN	NaN	NaN	NaN	18.845	1.52103	NaN	NaN	1.2925	0.46659	NaN	NaN	NaN	NaN	NaN	NaN	NaN	NaN	NaN	NaN	NaN	NaN	NaN	NaN	NaN	NaN	NaN	NaN	0.000409285	8.23259e-05
California Current Ecosystem	605	1	45	NaN	NaN	NaN	NaN	NaN	NaN	NaN	NaN	NaN	NaN	NaN	NaN	NaN	NaN	NaN	NaN	NaN	NaN	NaN	NaN	NaN	NaN	NaN	NaN	NaN	NaN	NaN	NaN	NaN	NaN	NaN	NaN	NaN	NaN	NaN	NaN	NaN	NaN	0.000251956	5.43784e-05
California Current Ecosystem	605	2	2	NaN	NaN	NaN	NaN	NaN	NaN	NaN	NaN	NaN	NaN	NaN	NaN	NaN	NaN	NaN	NaN	NaN	NaN	NaN	NaN	NaN	NaN	NaN	NaN	NaN	NaN	NaN	NaN	NaN	NaN	NaN	NaN	NaN	NaN	NaN	NaN	NaN	NaN	0.351826	0.0439808
California Current Ecosystem	605	2	5	0.147085	0.015043	0.000591456	0.000418774	0.0596138	0.0279633	0.085	0.00933928	0.239	0.030348	0.738064	0.0748024	NaN	NaN	1.635	0.0548655	NaN	NaN	0.111	0.00406885	0.620262	0.10213	0.293333	0.117164	0.316667	0.138724	NaN	NaN	NaN	NaN	NaN	NaN	NaN	NaN	NaN	NaN	NaN	NaN	0.245343	0.0306704
California Current Ecosystem	605	2	8	NaN	NaN	NaN	NaN	NaN	NaN	NaN	NaN	NaN	NaN	NaN	NaN	NaN	NaN	NaN	NaN	NaN	NaN	NaN	NaN	NaN	NaN	NaN	NaN	NaN	NaN	NaN	NaN	NaN	NaN	NaN	NaN	NaN	NaN	NaN	NaN	NaN	NaN	0.196006	0.0250741
California Current Ecosystem	605	2	12	0.172793	0.0367236	0.00159317	0.00117993	0.0458533	0.0197086	0.058	0.0152971	0.154	0.0317175	0.698914	0.0895716	NaN	NaN	1.73	0.0818401	NaN	NaN	0.114	0.00509823	0.683927	0.04526	0.543333	0.118607	0.426667	0.220479	NaN	NaN	NaN	NaN	NaN	NaN	NaN	NaN	NaN	NaN	NaN	NaN	0.148086	0.0188088
California Current Ecosystem	605	2	20	0.201946	0.0446301	0.000458533	0.000311137	0.0498254	0.0194091	0.079	0.00936305	0.22	0.04219	0.674909	0.0653432	NaN	NaN	1.627	0.0546125	NaN	NaN	0.125	0.00562731	0.679324	0.0551066	0.34	0.117433	0.176667	0.11649	NaN	NaN	NaN	NaN	NaN	NaN	NaN	NaN	NaN	NaN	NaN	NaN	0.0971318	0.0130069
California Current Ecosystem	605	2	25	NaN	NaN	NaN	NaN	NaN	NaN	NaN	NaN	NaN	NaN	NaN	NaN	NaN	NaN	NaN	NaN	NaN	NaN	NaN	NaN	NaN	NaN	NaN	NaN	NaN	NaN	NaN	NaN	NaN	NaN	NaN	NaN	NaN	NaN	NaN	NaN	NaN	NaN	0.0752428	0.00996727
California Current Ecosystem	605	2	30	NaN	NaN	NaN	NaN	NaN	NaN	NaN	NaN	NaN	NaN	NaN	NaN	NaN	NaN	NaN	NaN	NaN	NaN	NaN	NaN	NaN	NaN	NaN	NaN	NaN	NaN	NaN	NaN	NaN	NaN	NaN	NaN	NaN	NaN	NaN	NaN	NaN	NaN	0.0591017	0.00773865
California Current Ecosystem	605	2	35	NaN	NaN	NaN	NaN	NaN	NaN	0.086	0.0220454	0.282	0.0610246	NaN	NaN	NaN	NaN	1.52	0.0724486	NaN	NaN	0.156	0.0169115	NaN	NaN	NaN	NaN	NaN	NaN	NaN	NaN	NaN	NaN	NaN	NaN	NaN	NaN	NaN	NaN	NaN	NaN	0.0459755	0.00593311
California Current Ecosystem	605	2	40	0.18245	0.0249958	0.00068482	0.00068482	0.0390158	0.00778607	0.072	0.0131909	0.186	0.0385487	0.618936	0.0383637	NaN	NaN	1.638	0.119432	NaN	NaN	0.188	0.00840762	0.706332	0.109454	0.486667	0.165764	0.51	0.214554	NaN	NaN	NaN	NaN	NaN	NaN	NaN	NaN	NaN	NaN	NaN	NaN	0.0356724	0.00459668
California Current Ecosystem	605	2	45	NaN	NaN	NaN	NaN	NaN	NaN	NaN	NaN	NaN	NaN	NaN	NaN	NaN	NaN	NaN	NaN	NaN	NaN	NaN	NaN	NaN	NaN	NaN	NaN	NaN	NaN	NaN	NaN	NaN	NaN	NaN	NaN	NaN	NaN	NaN	NaN	NaN	NaN	0.0279655	0.00357953
California Current Ecosystem	605	2	50	NaN	NaN	NaN	NaN	NaN	NaN	0.066	0.00742375	0.266	0.0640781	NaN	NaN	NaN	NaN	1.602	0.0761158	NaN	NaN	0.238	0.0373363	NaN	NaN	NaN	NaN	NaN	NaN	NaN	NaN	NaN	NaN	NaN	NaN	NaN	NaN	NaN	NaN	NaN	NaN	0.021696	0.00271449
California Current Ecosystem	605	2	55	NaN	NaN	NaN	NaN	NaN	NaN	NaN	NaN	NaN	NaN	NaN	NaN	NaN	NaN	NaN	NaN	NaN	NaN	NaN	NaN	NaN	NaN	NaN	NaN	NaN	NaN	NaN	NaN	NaN	NaN	NaN	NaN	NaN	NaN	NaN	NaN	NaN	NaN	0.0169492	0.00212115
California Current Ecosystem	605	2	60	0.237598	0.034441	0.00237787	0.00103147	0.0456168	0.0126496	0.07125	0.00971698	0.22125	0.040771	0.603902	0.0497405	NaN	NaN	1.72625	0.0645677	NaN	NaN	0.32125	0.015052	0.504504	0.0438411	0.1	0.116047	0.0533333	0.188001	NaN	NaN	NaN	NaN	NaN	NaN	NaN	NaN	NaN	NaN	NaN	NaN	0.0130742	0.00163678
California Current Ecosystem	605	2	70	0.286452	0.0861792	0.00316914	0.000836387	0.0399052	0.0128167	0.264444	0.0679483	0.348889	0.058534	0.698834	0.0614582	NaN	NaN	2.00222	0.0834961	NaN	NaN	0.493333	0.0421966	0.4005	0.14321	0.07	0.115874	-0.0233333	0.115335	NaN	NaN	NaN	NaN	NaN	NaN	NaN	NaN	NaN	NaN	NaN	NaN	0.0073023	0.000915288
California Current Ecosystem	605	2	80	0.143761	0.0416421	0.00354341	0.00231643	0.01748	0.00384479	1.46625	0.390023	0.31875	0.0416378	0.442751	0.070511	NaN	NaN	2.8225	0.265274	NaN	NaN	0.43	0.0279029	NaN	NaN	0.0166667	0.115566	-0.0466667	0.115201	NaN	NaN	NaN	NaN	NaN	NaN	NaN	NaN	NaN	NaN	NaN	NaN	0.00379327	0.000476658
California Current Ecosystem	605	2	90	NaN	NaN	NaN	NaN	NaN	NaN	4.27	0.47	0.135	0.125	NaN	NaN	NaN	NaN	4.535	0.365	NaN	NaN	0.275	0.025	NaN	NaN	NaN	NaN	NaN	NaN	NaN	NaN	NaN	NaN	NaN	NaN	NaN	NaN	NaN	NaN	NaN	NaN	0.00201408	0.000254259
California Current Ecosystem	605	2	100	0.0686226	0.0108584	0.00227129	0.000580195	0.0188742	0.00449766	5.49	0.714288	0.3325	0.0835325	0.25805	0.0229539	NaN	NaN	5.4725	0.517279	NaN	NaN	0.18875	0.022869	NaN	NaN	NaN	NaN	NaN	NaN	NaN	NaN	NaN	NaN	NaN	NaN	NaN	NaN	NaN	NaN	NaN	NaN	0.00110485	0.000144892
California Current Ecosystem	605	2	110	NaN	NaN	NaN	NaN	NaN	NaN	NaN	NaN	NaN	NaN	NaN	NaN	NaN	NaN	NaN	NaN	NaN	NaN	NaN	NaN	NaN	NaN	NaN	NaN	NaN	NaN	NaN	NaN	NaN	NaN	NaN	NaN	NaN	NaN	NaN	NaN	NaN	NaN	0.000636046	0.00010307
California Current Ecosystem	605	3	2	3.80065	1.86515	0.333731	0.0937773	0.76718	0.390654	1.32333	0.34033	0.4	0.0994317	7.91206	1.10072	NaN	NaN	6.85667	0.727446	NaN	NaN	6.62333	0.544185	44.7101	4.19525	0.153333	0.12252	0.176667	0.11649	NaN	NaN	NaN	NaN	NaN	NaN	NaN	NaN	NaN	NaN	NaN	NaN	0.276427	0.0679075
California Current Ecosystem	605	3	5	4.41458	1.74936	0.333041	0.048817	1.38762	0.682597	1.2175	0.295658	0.37125	0.0676239	8.15245	0.434793	NaN	NaN	6.7325	0.566369	NaN	NaN	6.63	0.461047	36.6887	4.6479	0.436667	0.15878	0.333333	0.117395	NaN	NaN	NaN	NaN	NaN	NaN	NaN	NaN	NaN	NaN	NaN	NaN	0.11867	0.0302393
California Current Ecosystem	605	3	8	2.35926	1.00653	0.45805	0.156806	0.859739	0.271145	2.648	0.42738	0.59	0.107842	6.62911	1.13634	NaN	NaN	8.514	0.709772	NaN	NaN	5.194	0.531607	17.3293	2.00015	0.403333	0.153007	0.243333	0.139563	NaN	NaN	NaN	NaN	NaN	NaN	NaN	NaN	NaN	NaN	NaN	NaN	0.0504933	0.0134962
California Current Ecosystem	605	3	12	1.13295	0.345671	0.274492	0.162476	0.354223	0.105815	3.50667	1.27627	0.551111	0.129555	5.98815	1.50113	NaN	NaN	9.27889	1.01158	NaN	NaN	4.91111	0.787638	5.10169	2.22835	0.316667	0.117298	0.276667	0.117067	NaN	NaN	NaN	NaN	NaN	NaN	NaN	NaN	NaN	NaN	NaN	NaN	0.0172173	0.00469689
California Current Ecosystem	605	3	20	1.23156	0.606631	0.265003	0.103873	0.240508	0.0393331	5.85	1.50822	0.678571	0.123567	5.1323	0.945517	NaN	NaN	10.9729	1.12679	NaN	NaN	3.63286	0.814268	1.25373	0.507993	0.193333	0.116586	0.136667	0.131191	NaN	NaN	NaN	NaN	NaN	NaN	NaN	NaN	NaN	NaN	NaN	NaN	0.00342446	0.000912826
California Current Ecosystem	605	3	25	0.8222	0.567658	0.136309	0.067798	0.203244	0.0460157	9.8575	1.4347	0.8375	0.138767	3.03509	0.860173	NaN	NaN	13.7125	1.04527	NaN	NaN	2.185	0.67878	0.291795	0.05489	0.346667	0.207552	0.513333	0.251484	NaN	NaN	NaN	NaN	NaN	NaN	NaN	NaN	NaN	NaN	NaN	NaN	0.00169196	0.000495739
California Current Ecosystem	605	3	30	NaN	NaN	NaN	NaN	NaN	NaN	9.31333	2.5886	0.776667	0.0926163	NaN	NaN	NaN	NaN	12.7267	1.65653	NaN	NaN	1.70667	0.798756	NaN	NaN	NaN	NaN	NaN	NaN	NaN	NaN	NaN	NaN	NaN	NaN	NaN	NaN	NaN	NaN	NaN	NaN	0.000921257	0.000290455
California Current Ecosystem	605	3	35	NaN	NaN	NaN	NaN	NaN	NaN	NaN	NaN	NaN	NaN	NaN	NaN	NaN	NaN	NaN	NaN	NaN	NaN	NaN	NaN	NaN	NaN	NaN	NaN	NaN	NaN	NaN	NaN	NaN	NaN	NaN	NaN	NaN	NaN	NaN	NaN	NaN	NaN	0.000542221	0.000172633
California Current Ecosystem	605	3	40	NaN	NaN	NaN	NaN	NaN	NaN	14.9233	0.867373	0.53	0.0550757	NaN	NaN	NaN	NaN	16.0433	0.932036	NaN	NaN	0.523333	0.0592546	NaN	NaN	NaN	NaN	NaN	NaN	NaN	NaN	NaN	NaN	NaN	NaN	NaN	NaN	NaN	NaN	NaN	NaN	0.000335884	0.000106842
California Current Ecosystem	605	4	2	0.369972	0.0364393	0.0518024	0.0172272	0.0819858	0.012402	0.895	0.0406207	0.36	0.0645497	1.58337	0.20111	NaN	NaN	3.25833	0.137103	NaN	NaN	0.923333	0.0983757	4.54738	0.471783	0.395	0.101975	0.2475	0.101237	NaN	NaN	NaN	NaN	NaN	NaN	NaN	NaN	NaN	NaN	NaN	NaN	0.313397	0.0687375
California Current Ecosystem	605	4	5	NaN	NaN	NaN	NaN	NaN	NaN	0.815	0.04575	0.25	0.068678	NaN	NaN	NaN	NaN	3.25	0.170245	NaN	NaN	0.8675	0.0642099	NaN	NaN	NaN	NaN	NaN	NaN	NaN	NaN	NaN	NaN	NaN	NaN	NaN	NaN	NaN	NaN	NaN	NaN	0.203406	0.043686
California Current Ecosystem	605	4	8	0.372857	0.0454363	0.0479082	0.0209833	0.0608081	0.00656075	0.878571	0.0369865	0.381429	0.0597785	1.54865	0.133875	NaN	NaN	3.33429	0.129804	NaN	NaN	0.861429	0.0720591	5.29511	0.405487	0.5375	0.102688	0.2675	0.101337	NaN	NaN	NaN	NaN	NaN	NaN	NaN	NaN	NaN	NaN	NaN	NaN	0.139687	0.0301212
California Current Ecosystem	605	4	12	0.337844	0.0386746	0.0322707	0.00849427	0.0761367	0.0146436	0.892222	0.0330741	0.257778	0.0370727	1.41532	0.110946	NaN	NaN	3.30111	0.11337	NaN	NaN	0.904444	0.0641637	4.74902	0.554506	0.4475	0.102237	-0.005	0.236308	NaN	NaN	NaN	NaN	NaN	NaN	NaN	NaN	NaN	NaN	NaN	NaN	0.0905832	0.018952
California Current Ecosystem	605	4	20	0.368797	0.0409717	0.054826	0.0250856	0.0746045	0.011291	0.89	0.033	0.38	0.0557773	1.50782	0.1351	NaN	NaN	3.29556	0.113185	NaN	NaN	0.883333	0.0660177	3.06347	0.268244	0.6275	0.103137	0.195	0.100975	NaN	NaN	NaN	NaN	NaN	NaN	NaN	NaN	NaN	NaN	NaN	NaN	0.0398282	0.00868305
California Current Ecosystem	605	4	25	0.402787	0.0392958	0.0654334	0.0342256	0.0682284	0.00568501	0.9	0.0408248	0.333333	0.0880404	1.44854	0.0798309	NaN	NaN	3.30333	0.138941	NaN	NaN	0.903333	0.111435	NaN	NaN	0.53	0.119304	0.213333	0.116702	NaN	NaN	NaN	NaN	NaN	NaN	NaN	NaN	NaN	NaN	NaN	NaN	0.0248122	0.00544022
California Current Ecosystem	605	4	30	0.343587	0.0345302	0.04293	0.014675	0.0781451	0.00785262	0.943	0.0329826	0.278	0.0539712	1.57192	0.157644	NaN	NaN	3.347	0.109004	NaN	NaN	0.908	0.0596248	1.39311	0.108958	0.565	0.111841	0.265	0.101325	NaN	NaN	NaN	NaN	NaN	NaN	NaN	NaN	NaN	NaN	NaN	NaN	0.0151022	0.00346859
California Current Ecosystem	605	4	35	NaN	NaN	NaN	NaN	NaN	NaN	NaN	NaN	NaN	NaN	NaN	NaN	NaN	NaN	NaN	NaN	NaN	NaN	NaN	NaN	NaN	NaN	NaN	NaN	NaN	NaN	NaN	NaN	NaN	NaN	NaN	NaN	NaN	NaN	NaN	NaN	NaN	NaN	0.00881585	0.00208521
California Current Ecosystem	605	4	40	0.34266	0.0634038	0.081422	0.0420215	0.075551	0.0141641	4.44	1.40914	0.492	0.112673	1.98492	0.207429	NaN	NaN	5.831	0.912694	NaN	NaN	1.102	0.0618565	0.529099	0.0626527	0.0925	0.100462	0.14	0.1007	NaN	NaN	NaN	NaN	NaN	NaN	NaN	NaN	NaN	NaN	NaN	NaN	0.00562853	0.00129616
California Current Ecosystem	605	4	45	NaN	NaN	NaN	NaN	NaN	NaN	NaN	NaN	NaN	NaN	NaN	NaN	NaN	NaN	NaN	NaN	NaN	NaN	NaN	NaN	NaN	NaN	NaN	NaN	NaN	NaN	NaN	NaN	NaN	NaN	NaN	NaN	NaN	NaN	NaN	NaN	NaN	NaN	0.00342394	0.000762786
California Current Ecosystem	605	4	50	0.24252	0.0539587	0.0347892	0.0183374	0.0440008	0.0103073	13.531	0.831321	0.34	0.0780456	1.18282	0.270226	NaN	NaN	13.061	0.762173	NaN	NaN	0.675	0.07932	NaN	NaN	0.06	0.1003	0.1975	0.100987	NaN	NaN	NaN	NaN	NaN	NaN	NaN	NaN	NaN	NaN	NaN	NaN	0.00212277	0.000472552
California Current Ecosystem	605	4	55	NaN	NaN	NaN	NaN	NaN	NaN	NaN	NaN	NaN	NaN	NaN	NaN	NaN	NaN	NaN	NaN	NaN	NaN	NaN	NaN	NaN	NaN	NaN	NaN	NaN	NaN	NaN	NaN	NaN	NaN	NaN	NaN	NaN	NaN	NaN	NaN	NaN	NaN	0.00142104	0.000337346
California Current Ecosystem	605	5	2	0.109407	0.0177598	5.68813e-05	4.72652e-05	0.031426	0.00514937	0.123333	0.015899	0.221111	0.0326788	0.473307	0.03491	NaN	NaN	1.87667	0.0658889	NaN	NaN	0.0977778	0.00325926	0.527515	0.0484678	0.1425	0.100712	0.2525	0.101263	NaN	NaN	NaN	NaN	NaN	NaN	NaN	NaN	NaN	NaN	NaN	NaN	0.396986	0.0598509
California Current Ecosystem	605	5	5	NaN	NaN	NaN	NaN	NaN	NaN	NaN	NaN	NaN	NaN	NaN	NaN	NaN	NaN	NaN	NaN	NaN	NaN	NaN	NaN	NaN	NaN	NaN	NaN	NaN	NaN	NaN	NaN	NaN	NaN	NaN	NaN	NaN	NaN	NaN	NaN	NaN	NaN	0.273536	0.0394844
California Current Ecosystem	605	5	8	NaN	NaN	NaN	NaN	NaN	NaN	NaN	NaN	NaN	NaN	NaN	NaN	NaN	NaN	NaN	NaN	NaN	NaN	NaN	NaN	NaN	NaN	NaN	NaN	NaN	NaN	NaN	NaN	NaN	NaN	NaN	NaN	NaN	NaN	NaN	NaN	NaN	NaN	0.211235	0.0304921
California Current Ecosystem	605	5	12	0.113837	0.0129	0.001869	0.001157	0.0378122	0.00703445	0.104444	0.0161685	0.22	0.0162447	0.548868	0.0329163	NaN	NaN	1.82889	0.0642963	NaN	NaN	0.0955556	0.00318519	0.532222	0.036487	0.3	0.1015	0.3175	0.101587	NaN	NaN	NaN	NaN	NaN	NaN	NaN	NaN	NaN	NaN	NaN	NaN	0.149956	0.0200413
California Current Ecosystem	605	5	20	0.0982353	0.00876116	0.000898458	0.000453992	0.038767	0.0159665	0.132	0.0235372	0.186	0.0136382	0.48321	0.0473917	NaN	NaN	1.868	0.112045	NaN	NaN	0.094	0.00420381	NaN	NaN	0.3625	0.101813	0.3225	0.101612	NaN	NaN	NaN	NaN	NaN	NaN	NaN	NaN	NaN	NaN	NaN	NaN	0.103999	0.0139001
California Current Ecosystem	605	5	25	NaN	NaN	NaN	NaN	NaN	NaN	NaN	NaN	NaN	NaN	NaN	NaN	NaN	NaN	NaN	NaN	NaN	NaN	NaN	NaN	NaN	NaN	NaN	NaN	NaN	NaN	NaN	NaN	NaN	NaN	NaN	NaN	NaN	NaN	NaN	NaN	NaN	NaN	0.08633	0.011539
California Current Ecosystem	605	5	30	0.105572	0.00613666	0.00119914	0.000540424	0.0199496	0.00410188	0.117778	0.0127778	0.246667	0.0404489	0.478961	0.0258919	NaN	NaN	1.71444	0.0604815	NaN	NaN	0.105556	0.00351852	0.46875	0.0792005	0.3175	0.101587	0.35	0.10175	NaN	NaN	NaN	NaN	NaN	NaN	NaN	NaN	NaN	NaN	NaN	NaN	0.0693787	0.0092738
California Current Ecosystem	605	5	35	NaN	NaN	NaN	NaN	NaN	NaN	NaN	NaN	NaN	NaN	NaN	NaN	NaN	NaN	NaN	NaN	NaN	NaN	NaN	NaN	NaN	NaN	NaN	NaN	NaN	NaN	NaN	NaN	NaN	NaN	NaN	NaN	NaN	NaN	NaN	NaN	NaN	NaN	0.0560272	0.00748962
California Current Ecosystem	605	5	40	NaN	NaN	NaN	NaN	NaN	NaN	NaN	NaN	NaN	NaN	NaN	NaN	NaN	NaN	NaN	NaN	NaN	NaN	NaN	NaN	NaN	NaN	NaN	NaN	NaN	NaN	NaN	NaN	NaN	NaN	NaN	NaN	NaN	NaN	NaN	NaN	NaN	NaN	0.044844	0.0059952
California Current Ecosystem	605	5	45	NaN	NaN	NaN	NaN	NaN	NaN	0.0875	0.0347311	0.135	0.0184842	NaN	NaN	NaN	NaN	1.7525	0.092625	NaN	NaN	0.1625	0.0103078	NaN	NaN	NaN	NaN	NaN	NaN	NaN	NaN	NaN	NaN	NaN	NaN	NaN	NaN	NaN	NaN	NaN	NaN	0.0354221	0.00473615
California Current Ecosystem	605	5	50	0.241595	0.0532483	0.00236104	0.00135091	0.029813	0.001378	0.118	0.0285307	0.196	0.0132375	0.690615	0.0541886	NaN	NaN	2.014	0.154713	NaN	NaN	0.244	0.0271293	0.565737	0.135394	0.04	0.1002	0.025	0.100125	NaN	NaN	NaN	NaN	NaN	NaN	NaN	NaN	NaN	NaN	NaN	NaN	0.0276844	0.00370216
California Current Ecosystem	605	5	55	NaN	NaN	NaN	NaN	NaN	NaN	0.18	0.028	0.22	0.032	NaN	NaN	NaN	NaN	2.01	0.211	NaN	NaN	0.27	0.027	NaN	NaN	NaN	NaN	NaN	NaN	NaN	NaN	NaN	NaN	NaN	NaN	NaN	NaN	NaN	NaN	NaN	NaN	0.0207513	0.00277568
California Current Ecosystem	605	5	60	0.358774	0.0462032	0.00314427	0.00204257	0.0397167	0.0021521	0.175	0.053519	0.1925	0.0319458	1.10376	0.110615	NaN	NaN	2.6	0.111114	NaN	NaN	0.54625	0.0635536	0.759656	0.202505	0.03	0.132476	-0.0175	0.172355	NaN	NaN	NaN	NaN	NaN	NaN	NaN	NaN	NaN	NaN	NaN	NaN	0.0139146	0.00186209
California Current Ecosystem	605	5	70	0.348923	0.0477282	0.00395741	0.00191777	0.0413433	0.011625	1.47333	0.402958	0.235556	0.0321071	1.34265	0.120158	NaN	NaN	3.60222	0.180653	NaN	NaN	0.894444	0.0934391	0.413444	0.0814812	-0.0525	0.0997375	0.1075	0.100538	NaN	NaN	NaN	NaN	NaN	NaN	NaN	NaN	NaN	NaN	NaN	NaN	0.0050469	0.000791094
California Current Ecosystem	605	5	80	0.333794	0.0236618	0.00813861	0.00633022	0.0248227	0.00562809	4.428	0.848784	0.328	0.0383927	0.822904	0.0532839	NaN	NaN	5.048	0.422225	NaN	NaN	0.59	0.0403733	NaN	NaN	0.07	0.141916	0.26	0.14326	NaN	NaN	NaN	NaN	NaN	NaN	NaN	NaN	NaN	NaN	NaN	NaN	0.00164057	0.000249099
California Current Ecosystem	704	1	2	0.497856	0.11744	0.000849918	0.000849918	0.111127	0.0336125	6.31167	0.818696	0.586667	0.0298515	2.36461	0.557131	NaN	NaN	8.17	1.11162	NaN	NaN	1.58667	0.210201	10.4622	5.57102	0.425	0.144427	0.155	0.142517	NaN	NaN	NaN	NaN	NaN	NaN	NaN	NaN	NaN	NaN	NaN	NaN	NaN	NaN
California Current Ecosystem	704	1	5	0.333268	0.0848811	0.0194072	0.0121531	0.0776638	0.0145201	6.348	0.835879	0.558	0.0294267	1.6987	0.362178	NaN	NaN	8.076	1.15496	NaN	NaN	1.294	0.27358	5.61393	2.98069	0.7225	0.199599	0.395	0.111766	NaN	NaN	NaN	NaN	NaN	NaN	NaN	NaN	NaN	NaN	NaN	NaN	NaN	NaN
California Current Ecosystem	704	1	8	0.319922	0.066095	0.0142647	0.00718283	0.0853254	0.0136226	5.95111	0.568774	0.582222	0.0532754	1.70292	0.171574	NaN	NaN	7.53778	0.743977	NaN	NaN	1.38556	0.169149	2.81977	0.485531	0.7525	0.249345	0.475	0.297391	NaN	NaN	NaN	NaN	NaN	NaN	NaN	NaN	NaN	NaN	NaN	NaN	NaN	NaN
California Current Ecosystem	704	1	12	0.358788	0.0706186	0.0159189	0.00657682	0.0937773	0.0170565	6.26667	0.525996	0.584444	0.0529966	1.57344	0.180388	NaN	NaN	7.74556	0.725688	NaN	NaN	1.37222	0.178596	3.83185	1.49074	0.5125	0.102563	0.11	0.121312	NaN	NaN	NaN	NaN	NaN	NaN	NaN	NaN	NaN	NaN	NaN	NaN	NaN	NaN
California Current Ecosystem	704	1	20	0.322667	0.0829151	0.0350345	0.0216852	0.100539	0.0127092	8.04444	0.353538	0.634444	0.0586447	1.50967	0.110516	NaN	NaN	9.43556	0.497321	NaN	NaN	1.38444	0.181889	2.2014	0.57612	0.5275	0.166151	0.3275	0.112352	NaN	NaN	NaN	NaN	NaN	NaN	NaN	NaN	NaN	NaN	NaN	NaN	NaN	NaN
California Current Ecosystem	704	1	25	0.226202	0.0616514	0.0669279	0.0354572	0.0515323	0.00703985	9.174	0.790611	0.65	0.109864	1.31992	0.247794	NaN	NaN	10.864	0.872832	NaN	NaN	1.226	0.293472	0.691877	0.0766879	0.265	0.165	0.31	0.143613	NaN	NaN	NaN	NaN	NaN	NaN	NaN	NaN	NaN	NaN	NaN	NaN	NaN	NaN
California Current Ecosystem	704	1	30	0.214893	0.0466699	0.0438299	0.0204494	0.0540916	0.0102187	10.1171	0.444167	0.757143	0.106093	1.25985	0.128724	NaN	NaN	11.1714	0.442678	NaN	NaN	1.42571	0.182742	NaN	NaN	0.49	0.53	0.31	0.4	NaN	NaN	NaN	NaN	NaN	NaN	NaN	NaN	NaN	NaN	NaN	NaN	NaN	NaN
California Current Ecosystem	704	1	35	0.264274	0.0563085	0.0380194	0.0165979	0.0689726	0.0157794	10.632	0.555872	0.978	0.0700286	1.27541	0.170021	NaN	NaN	12.588	0.567425	NaN	NaN	1.422	0.187707	0.367726	0.0972529	0.02	0.1001	0.14	0.119722	NaN	NaN	NaN	NaN	NaN	NaN	NaN	NaN	NaN	NaN	NaN	NaN	NaN	NaN
California Current Ecosystem	704	1	40	NaN	NaN	NaN	NaN	NaN	NaN	10.995	0.680055	0.8275	0.137621	1.19397	0.0660573	NaN	NaN	12.26	0.618	NaN	NaN	1.4475	0.185174	NaN	NaN	NaN	NaN	NaN	NaN	NaN	NaN	NaN	NaN	NaN	NaN	NaN	NaN	NaN	NaN	NaN	NaN	NaN	NaN
California Current Ecosystem	704	1	45	NaN	NaN	NaN	NaN	NaN	NaN	NaN	NaN	NaN	NaN	NaN	NaN	NaN	NaN	NaN	NaN	NaN	NaN	NaN	NaN	NaN	NaN	NaN	NaN	NaN	NaN	NaN	NaN	NaN	NaN	NaN	NaN	NaN	NaN	NaN	NaN	NaN	NaN	NaN	NaN
California Current Ecosystem	704	1	50	0.176674	0.0495734	0.0219381	0.0108603	0.057781	0.0105299	14.1589	0.67212	0.814444	0.104271	0.673593	0.0726177	NaN	NaN	16.8478	0.7009	NaN	NaN	0.59	0.120669	0.0753382	0.0621847	0.1575	0.168887	0.105	0.181682	NaN	NaN	NaN	NaN	NaN	NaN	NaN	NaN	NaN	NaN	NaN	NaN	NaN	NaN
California Current Ecosystem	704	1	55	NaN	NaN	NaN	NaN	NaN	NaN	NaN	NaN	NaN	NaN	NaN	NaN	NaN	NaN	NaN	NaN	NaN	NaN	NaN	NaN	NaN	NaN	NaN	NaN	NaN	NaN	NaN	NaN	NaN	NaN	NaN	NaN	NaN	NaN	NaN	NaN	NaN	NaN	NaN	NaN
California Current Ecosystem	704	1	60	NaN	NaN	NaN	NaN	NaN	NaN	16.96	0.853	0.21	0.0544671	0.361973	0.0359245	NaN	NaN	19.9125	1.00063	NaN	NaN	0.125	0.0262996	NaN	NaN	NaN	NaN	NaN	NaN	NaN	NaN	NaN	NaN	NaN	NaN	NaN	NaN	NaN	NaN	NaN	NaN	NaN	NaN
California Current Ecosystem	704	1	70	NaN	NaN	NaN	NaN	NaN	NaN	NaN	NaN	NaN	NaN	NaN	NaN	NaN	NaN	NaN	NaN	NaN	NaN	NaN	NaN	NaN	NaN	NaN	NaN	NaN	NaN	NaN	NaN	NaN	NaN	NaN	NaN	NaN	NaN	NaN	NaN	NaN	NaN	NaN	NaN
California Current Ecosystem	704	2	2	NaN	NaN	NaN	NaN	NaN	NaN	0.06	0.016	0.48	0.058	NaN	NaN	NaN	NaN	2.16	0.226	NaN	NaN	0.17	0.017	NaN	NaN	NaN	NaN	NaN	NaN	NaN	NaN	NaN	NaN	NaN	NaN	NaN	NaN	NaN	NaN	NaN	NaN	NaN	NaN
California Current Ecosystem	704	2	5	0.177468	0.0122671	0.000105453	0.000105453	0.0269459	0.00218939	0.0528571	0.0172812	0.392857	0.0725624	0.689709	0.0388256	NaN	NaN	2.14571	0.08488	NaN	NaN	0.217143	0.0110657	0.803596	0.10536	0.5	0.236925	0.8	0.430039	NaN	NaN	NaN	NaN	NaN	NaN	NaN	NaN	NaN	NaN	NaN	NaN	NaN	NaN
California Current Ecosystem	704	2	8	NaN	NaN	NaN	NaN	NaN	NaN	NaN	NaN	NaN	NaN	NaN	NaN	NaN	NaN	NaN	NaN	NaN	NaN	NaN	NaN	NaN	NaN	NaN	NaN	NaN	NaN	NaN	NaN	NaN	NaN	NaN	NaN	NaN	NaN	NaN	NaN	NaN	NaN	NaN	NaN
California Current Ecosystem	704	2	12	0.16063	0.0212535	0.00075634	0.000395351	0.0233988	0.00453846	0.068	0.0159374	0.428	0.0757232	0.637528	0.0472207	NaN	NaN	2.148	0.100534	NaN	NaN	0.204	0.018868	0.832806	0.0659593	0.156667	0.116375	0.276667	0.117067	NaN	NaN	NaN	NaN	NaN	NaN	NaN	NaN	NaN	NaN	NaN	NaN	NaN	NaN
California Current Ecosystem	704	2	20	0.230017	0.046088	0.000198011	0.0001117	0.0250964	0.00177075	0.0842857	0.0221313	0.392857	0.0351672	0.740955	0.0317851	NaN	NaN	2.23571	0.0882817	NaN	NaN	0.221429	0.011635	0.961355	0.106136	0.28	0.117087	0.303333	0.117221	NaN	NaN	NaN	NaN	NaN	NaN	NaN	NaN	NaN	NaN	NaN	NaN	NaN	NaN
California Current Ecosystem	704	2	25	NaN	NaN	NaN	NaN	NaN	NaN	NaN	NaN	NaN	NaN	NaN	NaN	NaN	NaN	NaN	NaN	NaN	NaN	NaN	NaN	NaN	NaN	NaN	NaN	NaN	NaN	NaN	NaN	NaN	NaN	NaN	NaN	NaN	NaN	NaN	NaN	NaN	NaN	NaN	NaN
California Current Ecosystem	704	2	30	0.187491	0.0105325	0.000716212	0.000425375	0.0351192	0.00329665	0.11	0.0356838	0.498333	0.127943	0.7502	0.0376582	NaN	NaN	2.22333	0.0948497	NaN	NaN	0.215	0.0111803	0.737016	0.0483251	0.406667	0.117818	0.34	0.117433	NaN	NaN	NaN	NaN	NaN	NaN	NaN	NaN	NaN	NaN	NaN	NaN	NaN	NaN
California Current Ecosystem	704	2	35	NaN	NaN	NaN	NaN	NaN	NaN	NaN	NaN	NaN	NaN	NaN	NaN	NaN	NaN	NaN	NaN	NaN	NaN	NaN	NaN	NaN	NaN	NaN	NaN	NaN	NaN	NaN	NaN	NaN	NaN	NaN	NaN	NaN	NaN	NaN	NaN	NaN	NaN	NaN	NaN
California Current Ecosystem	704	2	40	NaN	NaN	NaN	NaN	NaN	NaN	0.05	0.00912871	0.42	0.0729155	0.712569	0.0745102	NaN	NaN	2.0825	0.109125	NaN	NaN	0.305	0.0436845	NaN	NaN	NaN	NaN	NaN	NaN	NaN	NaN	NaN	NaN	NaN	NaN	NaN	NaN	NaN	NaN	NaN	NaN	NaN	NaN
California Current Ecosystem	704	2	45	NaN	NaN	NaN	NaN	NaN	NaN	NaN	NaN	NaN	NaN	NaN	NaN	NaN	NaN	NaN	NaN	NaN	NaN	NaN	NaN	NaN	NaN	NaN	NaN	NaN	NaN	NaN	NaN	NaN	NaN	NaN	NaN	NaN	NaN	NaN	NaN	NaN	NaN	NaN	NaN
California Current Ecosystem	704	2	50	0.186494	0.012722	7.08728e-05	5.35436e-05	0.0392758	0.00483403	0.11	0.0260768	0.354	0.0539073	0.75099	0.0425495	NaN	NaN	2.238	0.104559	NaN	NaN	0.374	0.107033	0.582383	0.111182	0.25	0.180278	0.136667	0.116259	NaN	NaN	NaN	NaN	NaN	NaN	NaN	NaN	NaN	NaN	NaN	NaN	NaN	NaN
California Current Ecosystem	704	2	55	NaN	NaN	NaN	NaN	NaN	NaN	0.0366667	0.0120185	0.456667	0.155599	0.887941	0.049397	NaN	NaN	2.20667	0.133175	NaN	NaN	0.413333	0.0926163	NaN	NaN	NaN	NaN	NaN	NaN	NaN	NaN	NaN	NaN	NaN	NaN	NaN	NaN	NaN	NaN	NaN	NaN	NaN	NaN
California Current Ecosystem	704	2	60	0.185383	0.0210612	0.000353732	7.84243e-05	0.0326063	0.00846158	0.1	0.08	0.4	0.14	0.891972	0.070143	NaN	NaN	2.255	0.166524	NaN	NaN	0.505	0.115	0.504166	0.15046	0.12	0.14227	0.11	0.142199	NaN	NaN	NaN	NaN	NaN	NaN	NaN	NaN	NaN	NaN	NaN	NaN	NaN	NaN
California Current Ecosystem	704	2	70	0.190908	0.0368857	0.000476611	0.000247984	0.044714	0.0101422	0.53625	0.187321	0.47375	0.0638619	0.75356	0.0801655	NaN	NaN	2.72	0.22043	NaN	NaN	0.50375	0.0645849	0.252852	0.039685	0.06	0.115816	0.106667	0.116086	NaN	NaN	NaN	NaN	NaN	NaN	NaN	NaN	NaN	NaN	NaN	NaN	NaN	NaN
California Current Ecosystem	704	2	80	NaN	NaN	NaN	NaN	NaN	NaN	1	0.385097	0.458	0.0850529	0.634804	0.0912841	NaN	NaN	3.112	0.340506	NaN	NaN	0.464	0.0667533	0.167677	0.0267677	-0.02	0.14128	0.085	0.142022	NaN	NaN	NaN	NaN	NaN	NaN	NaN	NaN	NaN	NaN	NaN	NaN	NaN	NaN
California Current Ecosystem	704	2	90	0.0780807	0.0171456	0.00409878	0.00157796	0.0222004	0.00554253	1.892	0.466448	0.61	0.0649615	0.452241	0.0849091	NaN	NaN	3.682	0.397736	NaN	NaN	0.352	0.0690941	NaN	NaN	0.21	0.142906	0.395	0.335	NaN	NaN	NaN	NaN	NaN	NaN	NaN	NaN	NaN	NaN	NaN	NaN	NaN	NaN
California Current Ecosystem	704	4	2	NaN	NaN	NaN	NaN	NaN	NaN	6.20333	1.16404	0.426667	0.069602	1.41126	0.12841	NaN	NaN	7.34333	1.16559	NaN	NaN	1.33333	0.364707	NaN	NaN	NaN	NaN	NaN	NaN	NaN	NaN	NaN	NaN	NaN	NaN	NaN	NaN	NaN	NaN	NaN	NaN	NaN	NaN
California Current Ecosystem	704	4	5	0.18676	0.0175846	0.0484706	0.0150845	0.071167	0.0265805	7.37667	0.992659	0.49	0.0488535	1.2603	0.105442	NaN	NaN	9.00833	1.25849	NaN	NaN	0.986667	0.0453627	7.30687	1.37969	0.3975	0.101987	0.0725	0.100362	NaN	NaN	NaN	NaN	NaN	NaN	NaN	NaN	NaN	NaN	NaN	NaN	NaN	NaN
California Current Ecosystem	704	4	8	NaN	NaN	NaN	NaN	NaN	NaN	NaN	NaN	NaN	NaN	NaN	NaN	NaN	NaN	NaN	NaN	NaN	NaN	NaN	NaN	NaN	NaN	NaN	NaN	NaN	NaN	NaN	NaN	NaN	NaN	NaN	NaN	NaN	NaN	NaN	NaN	NaN	NaN	NaN	NaN
California Current Ecosystem	704	4	12	0.18657	0.0490939	0.0279315	0.0058353	0.0350362	0.00340731	7.04889	0.733631	0.39	0.0350793	1.57394	0.0936485	NaN	NaN	8.51556	0.89236	NaN	NaN	1.08667	0.131403	6.35889	1.14808	0.6475	0.103237	0.3275	0.101638	NaN	NaN	NaN	NaN	NaN	NaN	NaN	NaN	NaN	NaN	NaN	NaN	NaN	NaN
California Current Ecosystem	704	4	20	0.137329	0.0380313	0.0537763	0.0236865	0.0613047	0.0338872	8.124	1.22075	0.426	0.0309192	1.23152	0.173954	NaN	NaN	9.698	1.54567	NaN	NaN	0.862	0.147594	3.61633	0.820075	0.545	0.102725	0.32	0.141126	NaN	NaN	NaN	NaN	NaN	NaN	NaN	NaN	NaN	NaN	NaN	NaN	NaN	NaN
California Current Ecosystem	704	4	25	NaN	NaN	NaN	NaN	NaN	NaN	7.3925	0.786981	0.4475	0.0330088	1.82407	0.138198	NaN	NaN	8.7075	0.85159	NaN	NaN	1.235	0.105869	NaN	NaN	NaN	NaN	NaN	NaN	NaN	NaN	NaN	NaN	NaN	NaN	NaN	NaN	NaN	NaN	NaN	NaN	NaN	NaN
California Current Ecosystem	704	4	30	0.138573	0.0297456	0.0415243	0.0136943	0.0409984	0.0117895	8.45	1.3292	0.484	0.0527826	1.12034	0.0823178	NaN	NaN	9.86	1.5764	NaN	NaN	0.856	0.164152	2.25078	1.04115	0.4275	0.102138	0.2125	0.101062	NaN	NaN	NaN	NaN	NaN	NaN	NaN	NaN	NaN	NaN	NaN	NaN	NaN	NaN
California Current Ecosystem	704	4	35	NaN	NaN	NaN	NaN	NaN	NaN	9.3975	1.42104	0.445	0.0429146	1.20746	0.204906	NaN	NaN	11.17	1.78329	NaN	NaN	0.8425	0.206655	NaN	NaN	NaN	NaN	NaN	NaN	NaN	NaN	NaN	NaN	NaN	NaN	NaN	NaN	NaN	NaN	NaN	NaN	NaN	NaN
California Current Ecosystem	704	4	40	0.103021	0.0167641	0.0385053	0.00709715	0.0401122	0.0161372	8.804	1.15891	0.49	0.0495984	1.26853	0.134555	NaN	NaN	10.8	1.20643	NaN	NaN	0.966	0.152532	1.1521	0.12521	0.355	0.165756	0.2925	0.141208	NaN	NaN	NaN	NaN	NaN	NaN	NaN	NaN	NaN	NaN	NaN	NaN	NaN	NaN
California Current Ecosystem	704	4	45	NaN	NaN	NaN	NaN	NaN	NaN	NaN	NaN	NaN	NaN	NaN	NaN	NaN	NaN	NaN	NaN	NaN	NaN	NaN	NaN	NaN	NaN	NaN	NaN	NaN	NaN	NaN	NaN	NaN	NaN	NaN	NaN	NaN	NaN	NaN	NaN	NaN	NaN	NaN	NaN
California Current Ecosystem	704	4	50	0.105796	0.0457976	0.0652587	0.00975687	0.0188254	0.00140187	10.3786	0.924661	0.534286	0.0439078	1.0983	0.13997	NaN	NaN	12.2786	1.1166	NaN	NaN	0.868571	0.143252	0.735954	0.39213	0.0233333	0.115605	-0.03	0.115297	NaN	NaN	NaN	NaN	NaN	NaN	NaN	NaN	NaN	NaN	NaN	NaN	NaN	NaN
California Current Ecosystem	704	4	55	NaN	NaN	NaN	NaN	NaN	NaN	NaN	NaN	NaN	NaN	NaN	NaN	NaN	NaN	NaN	NaN	NaN	NaN	NaN	NaN	NaN	NaN	NaN	NaN	NaN	NaN	NaN	NaN	NaN	NaN	NaN	NaN	NaN	NaN	NaN	NaN	NaN	NaN	NaN	NaN
California Current Ecosystem	704	4	60	0.162539	0.033284	0.087168	0.0468591	0.0503647	0.0157949	11.3225	1.32444	0.605	0.0938527	1.12689	0.364703	NaN	NaN	13.08	1.61301	NaN	NaN	0.765	0.301814	0.324519	0.0424519	0.04	0.2004	0.1	0.201	NaN	NaN	NaN	NaN	NaN	NaN	NaN	NaN	NaN	NaN	NaN	NaN	NaN	NaN
California Current Ecosystem	704	4	70	0.0979837	0.0223899	0.0338141	0.0130214	0.0324728	0.00956526	12.6143	0.736468	0.605714	0.047049	0.846189	0.109182	NaN	NaN	15.1271	0.959106	NaN	NaN	0.712857	0.133786	0.191628	0.0646239	0.0366667	0.153768	-0.01	0.115412	NaN	NaN	NaN	NaN	NaN	NaN	NaN	NaN	NaN	NaN	NaN	NaN	NaN	NaN
California Current Ecosystem	810	1	2	NaN	NaN	NaN	NaN	NaN	NaN	0.3075	0.0632949	0.45	0.0815475	NaN	NaN	NaN	NaN	0.835	0.101201	NaN	NaN	0.4675	0.127042	NaN	NaN	NaN	NaN	NaN	NaN	NaN	NaN	NaN	NaN	NaN	NaN	NaN	NaN	NaN	NaN	NaN	NaN	0.430218	0.0813074
California Current Ecosystem	810	1	5	0.409977	0.160017	0.249877	0.16598	0.132015	0.0553347	0.314	0.0357211	0.212	0.0428252	0.993414	0.13629	NaN	NaN	0.814	0.0844748	NaN	NaN	0.454	0.134224	1.19124	0.172528	0.0666667	0.115855	0.0866667	0.11597	NaN	NaN	NaN	NaN	NaN	NaN	NaN	NaN	NaN	NaN	NaN	NaN	0.198755	0.038366
California Current Ecosystem	810	1	8	NaN	NaN	NaN	NaN	NaN	NaN	0.32	0.0296985	0.325	0.045	1.27672	0.192615	NaN	NaN	1.015	0.105	NaN	NaN	0.82	0.0579828	NaN	NaN	NaN	NaN	NaN	NaN	NaN	NaN	NaN	NaN	NaN	NaN	NaN	NaN	NaN	NaN	NaN	NaN	0.121733	0.0275165
California Current Ecosystem	810	1	12	0.294097	0.0419313	0.264131	0.229605	0.139638	0.0743607	0.316667	0.0403801	0.337778	0.0541802	1.05391	0.139556	NaN	NaN	0.775556	0.0533362	NaN	NaN	0.653333	0.184699	1.47348	0.157348	0.6275	0.446026	0.5425	0.334	NaN	NaN	NaN	NaN	NaN	NaN	NaN	NaN	NaN	NaN	NaN	NaN	0.0716028	0.0148728
California Current Ecosystem	810	1	20	0.294895	0.0343378	0.595141	0.464008	0.0930733	0.0208051	0.3475	0.0595144	0.35625	0.0971732	1.41626	0.207049	NaN	NaN	0.81	0.131421	NaN	NaN	1.04875	0.377385	1.64186	0.768382	0.5825	0.300177	0.5525	0.253915	NaN	NaN	NaN	NaN	NaN	NaN	NaN	NaN	NaN	NaN	NaN	NaN	0.0274636	0.00485847
California Current Ecosystem	810	1	25	0.256816	0.0848723	0.849618	0.251507	0.127318	0.0635572	0.785	0.256856	0.5575	0.21136	2.53057	0.455677	NaN	NaN	1.7875	0.576749	NaN	NaN	2.7275	0.500672	NaN	NaN	0.56	0.2056	0.27	0.2027	NaN	NaN	NaN	NaN	NaN	NaN	NaN	NaN	NaN	NaN	NaN	NaN	0.0183706	0.00349372
California Current Ecosystem	810	1	30	0.26102	0.02512	0.599201	0.444	0.073551	0.0156478	0.938889	0.31062	0.678889	0.1503	1.65469	0.245603	NaN	NaN	1.91333	0.424421	NaN	NaN	1.62333	0.534961	0.820828	0.268137	0.18	0.1009	0.24	0.106849	NaN	NaN	NaN	NaN	NaN	NaN	NaN	NaN	NaN	NaN	NaN	NaN	0.0136527	0.00309516
California Current Ecosystem	810	1	35	0.185285	0.0367138	0.262931	0.175851	0.0668088	0.00705924	1.54857	0.394712	0.865714	0.164097	1.79801	0.465364	NaN	NaN	2.38714	0.415736	NaN	NaN	1.42714	0.466811	NaN	NaN	0.2775	0.101388	0.19	0.10095	NaN	NaN	NaN	NaN	NaN	NaN	NaN	NaN	NaN	NaN	NaN	NaN	0.00937544	0.0023322
California Current Ecosystem	810	1	40	0.133125	0.0105429	0.0395391	0.01311	0.0844393	0.0143189	2.90222	0.595266	0.954444	0.088602	1.4161	0.277331	NaN	NaN	3.87222	0.670041	NaN	NaN	1.48889	0.518552	0.362807	0.142679	0.2575	0.19198	0.2325	0.187855	NaN	NaN	NaN	NaN	NaN	NaN	NaN	NaN	NaN	NaN	NaN	NaN	0.00549208	0.00128915
California Current Ecosystem	810	1	45	NaN	NaN	NaN	NaN	NaN	NaN	NaN	NaN	NaN	NaN	NaN	NaN	NaN	NaN	NaN	NaN	NaN	NaN	NaN	NaN	NaN	NaN	NaN	NaN	NaN	NaN	NaN	NaN	NaN	NaN	NaN	NaN	NaN	NaN	NaN	NaN	NaN	NaN	0.00344959	0.000781876
California Current Ecosystem	810	1	50	0.0784404	0.0136759	0.085251	0.0750722	0.0584494	0.00438132	5.9425	0.326577	0.485	0.0669755	0.535128	0.0672377	NaN	NaN	7.1275	0.345418	NaN	NaN	0.375	0.0571027	0.0853061	0.037872	0.36	0.383471	0.2725	0.169478	NaN	NaN	NaN	NaN	NaN	NaN	NaN	NaN	NaN	NaN	NaN	NaN	0.00247675	0.000579407
California Current Ecosystem	810	1	55	NaN	NaN	NaN	NaN	NaN	NaN	NaN	NaN	NaN	NaN	NaN	NaN	NaN	NaN	NaN	NaN	NaN	NaN	NaN	NaN	NaN	NaN	NaN	NaN	NaN	NaN	NaN	NaN	NaN	NaN	NaN	NaN	NaN	NaN	NaN	NaN	NaN	NaN	0.00182351	0.000419819
California Current Ecosystem	810	1	60	0.0725579	0.013453	0.00887644	0.000943481	0.064364	0.00377379	8.02167	0.467429	0.395	0.0576628	0.41326	0.0647657	NaN	NaN	9.67667	0.599025	NaN	NaN	0.146667	0.0252543	0.0437848	0.0165351	0.22	0.178979	0.326667	0.128755	NaN	NaN	NaN	NaN	NaN	NaN	NaN	NaN	NaN	NaN	NaN	NaN	0.0013057	0.000296356
California Current Ecosystem	810	1	70	NaN	NaN	NaN	NaN	NaN	NaN	9.7	0.98	0.4	0.05	NaN	NaN	NaN	NaN	11.42	1.152	NaN	NaN	0.11	0.011	NaN	NaN	NaN	NaN	NaN	NaN	NaN	NaN	NaN	NaN	NaN	NaN	NaN	NaN	NaN	NaN	NaN	NaN	0.000753001	0.000175712
California Current Ecosystem	810	2	2	NaN	NaN	NaN	NaN	NaN	NaN	NaN	NaN	NaN	NaN	NaN	NaN	NaN	NaN	NaN	NaN	NaN	NaN	NaN	NaN	NaN	NaN	NaN	NaN	NaN	NaN	NaN	NaN	NaN	NaN	NaN	NaN	NaN	NaN	NaN	NaN	NaN	NaN	0.303787	0.110042
California Current Ecosystem	810	2	5	0.189876	0.0254643	0.0278909	0.00970259	0.0515595	0.00449288	0.191667	0.0293731	0.185	0.0272947	0.727322	0.0712738	NaN	NaN	1.37167	0.234228	NaN	NaN	0.216667	0.0149815	0.929795	0.0728175	0.256667	0.116952	0.253333	0.116933	NaN	NaN	NaN	NaN	NaN	NaN	NaN	NaN	NaN	NaN	NaN	NaN	0.204489	0.0547849
California Current Ecosystem	810	2	8	NaN	NaN	NaN	NaN	NaN	NaN	0.51	0.061	0.26	0.036	NaN	NaN	NaN	NaN	1.19	0.129	NaN	NaN	0.17	0.017	NaN	NaN	NaN	NaN	NaN	NaN	NaN	NaN	NaN	NaN	NaN	NaN	NaN	NaN	NaN	NaN	NaN	NaN	0.152522	0.0403728
California Current Ecosystem	810	2	12	NaN	NaN	NaN	NaN	NaN	NaN	NaN	NaN	NaN	NaN	NaN	NaN	NaN	NaN	NaN	NaN	NaN	NaN	NaN	NaN	NaN	NaN	NaN	NaN	NaN	NaN	NaN	NaN	NaN	NaN	NaN	NaN	NaN	NaN	NaN	NaN	NaN	NaN	0.11371	0.0285484
California Current Ecosystem	810	2	20	0.171294	0.0179481	0.026395	0.00318856	0.0478433	0.00282514	0.29375	0.0693062	0.2925	0.0674471	0.62326	0.0712146	NaN	NaN	1.25375	0.0941681	NaN	NaN	0.194444	0.0145403	0.838806	0.0469403	0.5225	0.142675	0.245	0.101225	NaN	NaN	NaN	NaN	NaN	NaN	NaN	NaN	NaN	NaN	NaN	NaN	0.0757689	0.0133591
California Current Ecosystem	810	2	25	NaN	NaN	NaN	NaN	NaN	NaN	0.275	0.135	0.24	0.14	1.01922	0.111922	NaN	NaN	1.245	0.245	NaN	NaN	0.205	0.035	NaN	NaN	NaN	NaN	NaN	NaN	NaN	NaN	NaN	NaN	NaN	NaN	NaN	NaN	NaN	NaN	NaN	NaN	0.0554058	0.0092727
California Current Ecosystem	810	2	30	0.115504	0.0116504	0.0151304	0.00161304	0.0415375	0.00425375	0.46	0.056	0.17	0.027	0.576168	0.0676168	NaN	NaN	1.2	0.13	NaN	NaN	0.18	0.018	0.645169	0.0745169	0.71	0.2071	0.11	0.2011	NaN	NaN	NaN	NaN	NaN	NaN	NaN	NaN	NaN	NaN	NaN	NaN	0.0396771	0.00624526
California Current Ecosystem	810	2	35	NaN	NaN	NaN	NaN	NaN	NaN	NaN	NaN	NaN	NaN	NaN	NaN	NaN	NaN	NaN	NaN	NaN	NaN	NaN	NaN	NaN	NaN	NaN	NaN	NaN	NaN	NaN	NaN	NaN	NaN	NaN	NaN	NaN	NaN	NaN	NaN	NaN	NaN	0.0302331	0.00542416
California Current Ecosystem	810	2	40	0.189659	0.016165	0.0372242	0.00600535	0.070665	0.0256321	0.267143	0.0571845	0.221429	0.0891609	0.720888	0.0623229	NaN	NaN	1.19286	0.0761175	NaN	NaN	0.234286	0.0224518	0.53137	0.125894	0.68	0.1034	0.3475	0.103632	NaN	NaN	NaN	NaN	NaN	NaN	NaN	NaN	NaN	NaN	NaN	NaN	0.0223163	0.00396847
California Current Ecosystem	810	2	45	NaN	NaN	NaN	NaN	NaN	NaN	NaN	NaN	NaN	NaN	NaN	NaN	NaN	NaN	NaN	NaN	NaN	NaN	NaN	NaN	NaN	NaN	NaN	NaN	NaN	NaN	NaN	NaN	NaN	NaN	NaN	NaN	NaN	NaN	NaN	NaN	NaN	NaN	0.0162981	0.00296668
California Current Ecosystem	810	2	50	0.17436	0.0194931	0.027325	0.00921984	0.040543	0.00355337	0.301429	0.0662401	0.301429	0.0506824	0.690359	0.0865163	NaN	NaN	1.47714	0.129921	NaN	NaN	0.23	0.0193956	0.339412	0.0645552	0.4225	0.102112	0.06	0.1003	NaN	NaN	NaN	NaN	NaN	NaN	NaN	NaN	NaN	NaN	NaN	NaN	0.0120871	0.00225792
California Current Ecosystem	810	2	55	NaN	NaN	NaN	NaN	NaN	NaN	0.185	0.025	0.24	0.15	0.54733	0.0457731	NaN	NaN	2.47	1	NaN	NaN	0.25	0.0176777	NaN	NaN	NaN	NaN	NaN	NaN	NaN	NaN	NaN	NaN	NaN	NaN	NaN	NaN	NaN	NaN	NaN	NaN	0.00897964	0.00174943
California Current Ecosystem	810	2	60	0.131085	0.0252575	0.0124235	0.00427804	0.0477468	0.00585239	0.385	0.105102	0.23	0.054935	0.486477	0.0727659	NaN	NaN	2.18875	0.172755	NaN	NaN	0.26125	0.00923658	0.176313	0.0446525	0.13	0.10065	-0.015	0.099925	NaN	NaN	NaN	NaN	NaN	NaN	NaN	NaN	NaN	NaN	NaN	NaN	0.00642268	0.00124869
California Current Ecosystem	810	2	70	0.117468	0.0142404	0.00402696	0.00141357	0.0685537	0.0191635	0.335714	0.0775474	0.33	0.0425385	0.374842	0.0366942	NaN	NaN	2.64714	0.120845	NaN	NaN	0.251429	0.00950311	0.164451	0.0264451	0.0433333	0.11572	0.0366667	0.115682	NaN	NaN	NaN	NaN	NaN	NaN	NaN	NaN	NaN	NaN	NaN	NaN	0.00319598	0.000592957
California Current Ecosystem	810	2	80	0.0864141	0.0156705	0.00292589	0.000309782	0.0551218	0.0144226	0.86	0.152503	0.15375	0.0219527	0.336509	0.0264639	NaN	NaN	3.05125	0.345276	NaN	NaN	0.2275	0.00804334	0.0640964	0.0200538	0.1325	0.100663	0.1375	0.100687	NaN	NaN	NaN	NaN	NaN	NaN	NaN	NaN	NaN	NaN	NaN	NaN	0.00155803	0.000286927
California Current Ecosystem	810	2	90	NaN	NaN	NaN	NaN	NaN	NaN	1.15	0.125	0.1	0.02	NaN	NaN	NaN	NaN	2.97	0.307	NaN	NaN	0.21	0.021	NaN	NaN	NaN	NaN	NaN	NaN	NaN	NaN	NaN	NaN	NaN	NaN	NaN	NaN	NaN	NaN	NaN	NaN	0.00100593	0.000179319
California Current Ecosystem	810	3	2	NaN	NaN	NaN	NaN	NaN	NaN	0.29	0.0873689	0.36	0.105357	NaN	NaN	NaN	NaN	1.43333	0.088527	NaN	NaN	0.776667	0.0448409	NaN	NaN	NaN	NaN	NaN	NaN	NaN	NaN	NaN	NaN	NaN	NaN	NaN	NaN	NaN	NaN	NaN	NaN	0.345497	0.0781444
California Current Ecosystem	810	3	5	0.339612	0.0615873	0.161716	0.0352071	0.0726862	0.00483892	0.315	0.10251	0.2275	0.106566	1.58499	0.0954046	NaN	NaN	1.8175	0.344029	NaN	NaN	0.7225	0.036125	3.14681	0.187454	0.44	0.136137	0.273333	0.117048	NaN	NaN	NaN	NaN	NaN	NaN	NaN	NaN	NaN	NaN	NaN	NaN	0.161481	0.03882
California Current Ecosystem	810	3	8	0.363946	0.0525719	0.113688	0.0233343	0.106915	0.0197995	0.341667	0.0742705	0.338333	0.0662529	1.49547	0.0976446	NaN	NaN	1.39	0.060829	NaN	NaN	0.74	0.0303315	NaN	NaN	0.555	0.145346	0.39	0.144179	NaN	NaN	NaN	NaN	NaN	NaN	NaN	NaN	NaN	NaN	NaN	NaN	0.0929885	0.0215859
California Current Ecosystem	810	3	12	0.288494	0.0413724	0.11707	0.0225375	0.0844116	0.00451113	0.272	0.115689	0.344	0.0909175	2.06078	0.638458	NaN	NaN	1.53	0.0728958	NaN	NaN	0.72	0.0321994	3.00573	0.215832	0.543333	0.118607	0.25	0.116913	NaN	NaN	NaN	NaN	NaN	NaN	NaN	NaN	NaN	NaN	NaN	NaN	0.0607834	0.0132362
California Current Ecosystem	810	3	20	0.275979	0.0282778	0.126714	0.0328714	0.110621	0.0425267	0.318571	0.0742399	0.43	0.112842	1.65664	0.0945713	NaN	NaN	1.51429	0.0889584	NaN	NaN	0.85	0.0374802	1.87212	0.11386	0.483333	0.118261	0.113333	0.116124	NaN	NaN	NaN	NaN	NaN	NaN	NaN	NaN	NaN	NaN	NaN	NaN	0.0256862	0.00442273
California Current Ecosystem	810	3	25	NaN	NaN	NaN	NaN	NaN	NaN	NaN	NaN	NaN	NaN	NaN	NaN	NaN	NaN	NaN	NaN	NaN	NaN	NaN	NaN	NaN	NaN	NaN	NaN	NaN	NaN	NaN	NaN	NaN	NaN	NaN	NaN	NaN	NaN	NaN	NaN	NaN	NaN	0.0156703	0.00261719
California Current Ecosystem	810	3	30	0.224959	0.0349365	0.151822	0.0293836	0.0897417	0.0205232	0.527143	0.112159	0.208571	0.0536048	1.43238	0.104547	NaN	NaN	1.55286	0.117528	NaN	NaN	0.847143	0.0430235	0.585273	0.0523617	0.21	0.14	0.0166667	0.115566	NaN	NaN	NaN	NaN	NaN	NaN	NaN	NaN	NaN	NaN	NaN	NaN	0.00982948	0.00159904
California Current Ecosystem	810	3	35	NaN	NaN	NaN	NaN	NaN	NaN	NaN	NaN	NaN	NaN	NaN	NaN	NaN	NaN	NaN	NaN	NaN	NaN	NaN	NaN	NaN	NaN	0.47	0.2047	0.19	0.2019	NaN	NaN	NaN	NaN	NaN	NaN	NaN	NaN	NaN	NaN	NaN	NaN	0.00626235	0.000993326
California Current Ecosystem	810	3	40	0.155924	0.0362857	0.10865	0.0324457	0.0700334	0.00409048	1.17286	0.295713	0.378571	0.0804579	1.16878	0.132966	NaN	NaN	1.97286	0.248947	NaN	NaN	0.665714	0.042306	0.159342	0.0557681	0.0166667	0.115566	-0.0366667	0.115258	NaN	NaN	NaN	NaN	NaN	NaN	NaN	NaN	NaN	NaN	NaN	NaN	0.00392473	0.000623716
California Current Ecosystem	810	3	45	NaN	NaN	NaN	NaN	NaN	NaN	NaN	NaN	NaN	NaN	NaN	NaN	NaN	NaN	NaN	NaN	NaN	NaN	NaN	NaN	NaN	NaN	NaN	NaN	NaN	NaN	NaN	NaN	NaN	NaN	NaN	NaN	NaN	NaN	NaN	NaN	NaN	NaN	0.00257544	0.000410375
California Current Ecosystem	810	3	50	0.107515	0.0276123	0.0672284	0.0283415	0.0536515	0.00944031	4.22571	0.790322	0.301429	0.0766696	0.840463	0.0709136	NaN	NaN	4.17714	0.589135	NaN	NaN	0.4	0.0453032	0.0774643	0.0155161	-0.04	0.115239	0.00666667	0.115509	NaN	NaN	NaN	NaN	NaN	NaN	NaN	NaN	NaN	NaN	NaN	NaN	0.00173725	0.000277846
California Current Ecosystem	810	3	55	NaN	NaN	NaN	NaN	NaN	NaN	NaN	NaN	NaN	NaN	NaN	NaN	NaN	NaN	NaN	NaN	NaN	NaN	NaN	NaN	NaN	NaN	NaN	NaN	NaN	NaN	NaN	NaN	NaN	NaN	NaN	NaN	NaN	NaN	NaN	NaN	NaN	NaN	0.00110131	0.000177295
California Current Ecosystem	810	3	60	0.041641	0.00453588	0.0182229	0.00492771	0.0401151	0.0106866	9.76571	0.505959	0.397143	0.0862089	0.526668	0.0356168	NaN	NaN	8.59571	0.404727	NaN	NaN	0.204286	0.030383	NaN	NaN	-0.0133333	0.115393	0.0166667	0.115566	NaN	NaN	NaN	NaN	NaN	NaN	NaN	NaN	NaN	NaN	NaN	NaN	0.000783296	0.000127012
California Current Ecosystem	810	4	2	0.376575	0.0871457	2.28429	0.69606	0.239732	0.10123	0.172	0.0372022	0.246	0.0546443	1.92479	0.154515	NaN	NaN	0.276	0.0835823	NaN	NaN	0.972	0.157398	3.44806	0.250886	0.175	0.142659	0.01	0.141492	NaN	NaN	NaN	NaN	NaN	NaN	NaN	NaN	NaN	NaN	NaN	NaN	0.446848	0.111717
California Current Ecosystem	810	4	5	0.335838	0.0588755	1.77581	0.102584	0.191762	0.0282171	0.166667	0.0952774	0.76	0.061101	2.12455	0.131946	NaN	NaN	0.29	0.113578	NaN	NaN	1.00333	0.234829	NaN	NaN	0.31	0.143613	0.125	0.142305	NaN	NaN	NaN	NaN	NaN	NaN	NaN	NaN	NaN	NaN	NaN	NaN	0.171492	0.042878
California Current Ecosystem	810	4	8	NaN	NaN	NaN	NaN	NaN	NaN	0.18	0.11	0.345	0.105	2.21258	0.231258	NaN	NaN	0.325	0.155	NaN	NaN	0.88	0.0622254	NaN	NaN	NaN	NaN	NaN	NaN	NaN	NaN	NaN	NaN	NaN	NaN	NaN	NaN	NaN	NaN	NaN	NaN	0.0719586	0.0254483
California Current Ecosystem	810	4	12	0.391653	0.115575	1.69779	0.36139	0.210047	0.0517344	0.605	0.407727	0.455	0.120727	2.24799	0.222122	NaN	NaN	0.655	0.404856	NaN	NaN	1.4875	0.544539	2.29391	0.315484	0.525	0.145134	0.22	0.142977	NaN	NaN	NaN	NaN	NaN	NaN	NaN	NaN	NaN	NaN	NaN	NaN	0.0495449	0.0123912
California Current Ecosystem	810	4	20	0.317043	0.0418987	1.83583	0.294759	0.280953	0.13401	0.628	0.442735	0.668	0.150645	2.27093	0.143141	NaN	NaN	0.86	0.494267	NaN	NaN	1.41	0.375926	0.899817	0.215626	0.5	0.144957	-0.01	0.141351	NaN	NaN	NaN	NaN	NaN	NaN	NaN	NaN	NaN	NaN	NaN	NaN	0.0141139	0.00353347
California Current Ecosystem	810	4	25	0.270609	0.0432523	1.80877	0.143053	0.205712	0.123567	0.433333	0.231397	0.44	0.133167	2.33704	0.339262	NaN	NaN	0.55	0.239653	NaN	NaN	1.78333	0.564102	0.52796	0.062796	0.345	0.165	-0.055	0.141032	NaN	NaN	NaN	NaN	NaN	NaN	NaN	NaN	NaN	NaN	NaN	NaN	0.00636161	0.0015954
California Current Ecosystem	810	4	30	0.283407	0.0645146	1.99361	0.184955	0.233643	0.0546627	1.654	0.652377	0.662	0.118127	2.20895	0.371605	NaN	NaN	1.892	0.743313	NaN	NaN	1.958	0.311278	0.32425	0.068808	0.475	0.14478	0.125	0.142305	NaN	NaN	NaN	NaN	NaN	NaN	NaN	NaN	NaN	NaN	NaN	NaN	0.00319884	0.000804709
California Current Ecosystem	810	4	35	NaN	NaN	NaN	NaN	NaN	NaN	NaN	NaN	NaN	NaN	NaN	NaN	NaN	NaN	NaN	NaN	NaN	NaN	NaN	NaN	NaN	NaN	NaN	NaN	NaN	NaN	NaN	NaN	NaN	NaN	NaN	NaN	NaN	NaN	NaN	NaN	NaN	NaN	0.00172539	0.000436347
California Current Ecosystem	810	4	40	0.126092	0.0113406	0.642225	0.171299	0.179303	0.0832311	5.318	0.867291	1.314	0.217798	1.34271	0.180672	NaN	NaN	5.96	0.777354	NaN	NaN	1.802	0.234252	0.0502678	0.0106255	0.11	0.142199	0.21	0.142906	NaN	NaN	NaN	NaN	NaN	NaN	NaN	NaN	NaN	NaN	NaN	NaN	0.00102583	0.000261457
California Current Ecosystem	810	5	2	0.303446	0.0398109	0.305855	0.0304665	0.0885083	0.0222295	1.998	0.323935	0.418	0.120806	2.21784	0.133821	NaN	NaN	0.886	0.183946	NaN	NaN	1.42	0.0827647	9.39371	1.67667	0.79	0.147007	0.07	0.141916	NaN	NaN	NaN	NaN	NaN	NaN	NaN	NaN	NaN	NaN	NaN	NaN	0.28904	0.139629
California Current Ecosystem	810	5	5	0.258729	0.0259729	0.426782	0.0427782	0.0849614	0.00859614	1.9	0.2	0.39	0.049	2.91497	0.301497	NaN	NaN	0.5	0.06	NaN	NaN	1.59	0.159	NaN	NaN	1.05	0.2105	0.25	0.2025	NaN	NaN	NaN	NaN	NaN	NaN	NaN	NaN	NaN	NaN	NaN	NaN	0.0706647	0.0255603
California Current Ecosystem	810	5	8	0.410765	0.0340863	0.229016	0.0186731	0.0812767	0.00952368	2.18	0.492747	0.693333	0.18169	2.05547	0.628441	NaN	NaN	1.09	0.241937	NaN	NaN	1.62	0.164621	NaN	NaN	0.9	0.209	0.15	0.2015	NaN	NaN	NaN	NaN	NaN	NaN	NaN	NaN	NaN	NaN	NaN	NaN	0.0346317	0.00866292
California Current Ecosystem	810	5	12	0.263157	0.0482519	0.289578	0.0705408	0.116439	0.0221614	2.048	0.300356	0.558	0.146062	2.37781	0.117371	NaN	NaN	0.918	0.229377	NaN	NaN	1.692	0.0935628	5.85767	1.0214	0.805	0.147114	0.085	0.142022	NaN	NaN	NaN	NaN	NaN	NaN	NaN	NaN	NaN	NaN	NaN	NaN	0.0174341	0.00436352
California Current Ecosystem	810	5	20	0.240032	0.0665173	0.276345	0.0687429	0.0923668	0.00539053	2.468	0.173303	0.656	0.144485	2.3649	0.202934	NaN	NaN	1.47	0.403621	NaN	NaN	1.788	0.130782	1.85113	0.416096	0.685	0.146265	0.185	0.14273	NaN	NaN	NaN	NaN	NaN	NaN	NaN	NaN	NaN	NaN	NaN	NaN	0.00807539	0.00202385
California Current Ecosystem	810	5	25	0.235065	0.0290582	0.287872	0.138406	0.0636484	0.00626831	2.82	0.330807	0.763333	0.272784	1.86774	0.219428	NaN	NaN	1.69333	0.268907	NaN	NaN	1.54333	0.192296	NaN	NaN	0.32	0.2032	0.07	0.2007	NaN	NaN	NaN	NaN	NaN	NaN	NaN	NaN	NaN	NaN	NaN	NaN	0.00510949	0.00128237
California Current Ecosystem	810	5	30	0.187647	0.028185	0.183697	0.0106635	0.0841872	0.00886068	3.43	0.1765	0.665	0.165404	1.49475	0.087495	NaN	NaN	2.49	0.383167	NaN	NaN	1.42	0.189165	0.31594	0.0608763	0.345	0.143861	0.215	0.142942	NaN	NaN	NaN	NaN	NaN	NaN	NaN	NaN	NaN	NaN	NaN	NaN	0.00303094	0.000762736
California Current Ecosystem	810	5	35	NaN	NaN	NaN	NaN	NaN	NaN	9.1	0.92	0.37	0.047	0.787838	0.0887838	NaN	NaN	8.46	0.856	NaN	NaN	0.62	0.062	NaN	NaN	NaN	NaN	NaN	NaN	NaN	NaN	NaN	NaN	NaN	NaN	NaN	NaN	NaN	NaN	NaN	NaN	0.00189962	0.000479905
California Current Ecosystem	810	5	40	0.127338	0.0242325	0.138982	0.0483525	0.062452	0.00596568	7.04	0.885711	0.6275	0.182363	1.04253	0.178538	NaN	NaN	6.7125	1.25151	NaN	NaN	0.8175	0.215111	0.069591	0.0232811	0.26	0.14326	0.135	0.142376	NaN	NaN	NaN	NaN	NaN	NaN	NaN	NaN	NaN	NaN	NaN	NaN	0.00130223	0.000330558
California Current Ecosystem	810	5	45	NaN	NaN	NaN	NaN	NaN	NaN	12.33	1.243	0.57	0.067	0.474798	0.0574798	NaN	NaN	11.29	1.139	NaN	NaN	0.27	0.027	NaN	NaN	NaN	NaN	NaN	NaN	NaN	NaN	NaN	NaN	NaN	NaN	NaN	NaN	NaN	NaN	NaN	NaN	0.000951822	0.000242956
California Current Ecosystem	810	6	2	NaN	NaN	NaN	NaN	NaN	NaN	0.105	0.015	0.105	0.025	NaN	NaN	NaN	NaN	0.515	0.0434871	NaN	NaN	0.21	0.0148492	NaN	NaN	NaN	NaN	NaN	NaN	NaN	NaN	NaN	NaN	NaN	NaN	NaN	NaN	NaN	NaN	NaN	NaN	0.455186	0.113802
California Current Ecosystem	810	6	5	0.179336	0.0104117	0.0142947	0.00491952	0.0397403	0.00591452	0.2	0.0602771	0.38	0.0493288	0.739872	0.0570506	NaN	NaN	1.08667	0.456995	NaN	NaN	0.22	0.0152753	0.627145	0.0514169	0.1	0.142128	0.05	0.141775	NaN	NaN	NaN	NaN	NaN	NaN	NaN	NaN	NaN	NaN	NaN	NaN	0.26921	0.0673076
California Current Ecosystem	810	6	8	NaN	NaN	NaN	NaN	NaN	NaN	NaN	NaN	NaN	NaN	NaN	NaN	NaN	NaN	NaN	NaN	NaN	NaN	NaN	NaN	NaN	NaN	NaN	NaN	NaN	NaN	NaN	NaN	NaN	NaN	NaN	NaN	NaN	NaN	NaN	NaN	NaN	NaN	0.178283	0.0445757
California Current Ecosystem	810	6	12	0.168497	0.0131447	0.00836477	0.00240855	0.0314112	0.00776962	0.142	0.0345543	0.168	0.0477912	0.63797	0.033003	NaN	NaN	0.614	0.124964	NaN	NaN	0.222	0.0106771	0.595629	0.0695629	0.335	0.14379	0.255	0.143224	NaN	NaN	NaN	NaN	NaN	NaN	NaN	NaN	NaN	NaN	NaN	NaN	0.0965394	0.0241399
California Current Ecosystem	810	6	20	0.177029	0.0238864	0.0105274	0.000665533	0.0521753	0.00522775	0.1675	0.02136	0.1475	0.0455293	0.62598	0.036299	NaN	NaN	0.6275	0.0913213	NaN	NaN	0.2325	0.011625	0.45024	0.0389079	0.595	0.145629	0.475	0.14478	NaN	NaN	NaN	NaN	NaN	NaN	NaN	NaN	NaN	NaN	NaN	NaN	0.0536032	0.0134058
California Current Ecosystem	810	6	25	NaN	NaN	NaN	NaN	NaN	NaN	0.12	0.022	0	0.01	0.680504	0.0780504	NaN	NaN	0.58	0.068	NaN	NaN	0.28	0.028	NaN	NaN	NaN	NaN	NaN	NaN	NaN	NaN	NaN	NaN	NaN	NaN	NaN	NaN	NaN	NaN	NaN	NaN	0.0427184	0.0106846
California Current Ecosystem	810	6	30	0.165314	0.0109992	0.0160601	0.00780104	0.0409013	0.00338098	0.475	0.367526	0.2675	0.0840015	0.729466	0.0949301	NaN	NaN	1.1325	0.380819	NaN	NaN	0.3475	0.0528165	0.68938	0.231463	0.325	0.143719	0.16	0.142553	NaN	NaN	NaN	NaN	NaN	NaN	NaN	NaN	NaN	NaN	NaN	NaN	0.0364193	0.00910982
California Current Ecosystem	810	6	35	0.138201	0.0348914	0.0204582	0.0126516	0.0277882	0.00230966	1.1025	0.525157	0.36	0.0234521	0.740104	0.0530963	NaN	NaN	1.685	0.466414	NaN	NaN	0.4775	0.0771767	0.613625	0.0713625	0.145	0.142447	-0.075	0.140891	NaN	NaN	NaN	NaN	NaN	NaN	NaN	NaN	NaN	NaN	NaN	NaN	0.0274528	0.0068682
California Current Ecosystem	810	6	40	0.108051	0.0266058	0.0127109	0.00288933	0.0350704	0.00576965	1.404	0.4814	0.344	0.0842971	0.632751	0.0428258	NaN	NaN	2.272	0.629479	NaN	NaN	0.436	0.0323419	0.462107	0.0397469	0.115	0.142235	-0.015	0.141315	NaN	NaN	NaN	NaN	NaN	NaN	NaN	NaN	NaN	NaN	NaN	NaN	0.0201756	0.00504891
California Current Ecosystem	810	6	45	NaN	NaN	NaN	NaN	NaN	NaN	NaN	NaN	NaN	NaN	NaN	NaN	NaN	NaN	NaN	NaN	NaN	NaN	NaN	NaN	NaN	NaN	NaN	NaN	NaN	NaN	NaN	NaN	NaN	NaN	NaN	NaN	NaN	NaN	NaN	NaN	NaN	NaN	0.0154047	0.00385618
California Current Ecosystem	810	6	50	0.0692076	0.00653834	0.0190496	0.00819959	0.0387244	0.012765	3.1275	0.388445	0.2875	0.0249583	0.521128	0.0766759	NaN	NaN	3.615	0.428768	NaN	NaN	0.415	0.041332	0.153942	0.0410164	0.05	0.141775	-0.02	0.14128	NaN	NaN	NaN	NaN	NaN	NaN	NaN	NaN	NaN	NaN	NaN	NaN	0.0103936	0.0026034
California Current Ecosystem	810	6	55	NaN	NaN	NaN	NaN	NaN	NaN	4.71	0.481	0.34	0.044	0.406847	0.0506847	NaN	NaN	4.63	0.473	NaN	NaN	0.34	0.034	NaN	NaN	NaN	NaN	NaN	NaN	NaN	NaN	NaN	NaN	NaN	NaN	NaN	NaN	NaN	NaN	NaN	NaN	0.00708033	0.00177508
California Current Ecosystem	810	6	60	0.0567211	0.00333253	0.019031	0.00399021	0.0365251	0.00489537	4.125	0.40997	0.24	0.100995	0.420915	0.0260457	NaN	NaN	4.4575	0.517564	NaN	NaN	0.33	0.0308221	NaN	NaN	0.13	0.142341	0.055	0.14181	NaN	NaN	NaN	NaN	NaN	NaN	NaN	NaN	NaN	NaN	NaN	NaN	0.00499135	0.00125284
California Current Ecosystem	810	6	70	NaN	NaN	NaN	NaN	NaN	NaN	7.07	1.62	0.25	0.13	0.337817	0.100206	NaN	NaN	6.445	1.325	NaN	NaN	0.19	0.07	NaN	NaN	NaN	NaN	NaN	NaN	NaN	NaN	NaN	NaN	NaN	NaN	NaN	NaN	NaN	NaN	NaN	NaN	0.00260391	0.000655976
California Current Ecosystem	810	6	80	NaN	NaN	NaN	NaN	NaN	NaN	9.35	0.945	0.21	0.031	NaN	NaN	NaN	NaN	8.01	0.811	NaN	NaN	NaN	NaN	NaN	NaN	NaN	NaN	NaN	NaN	NaN	NaN	NaN	NaN	NaN	NaN	NaN	NaN	NaN	NaN	NaN	NaN	0.0018143	0.000458576
California Current Ecosystem	810	6	90	NaN	NaN	NaN	NaN	NaN	NaN	10.37	1.047	0.22	0.032	0.29841	0.039841	NaN	NaN	9.16	0.926	NaN	NaN	0.08	0.008	NaN	NaN	NaN	NaN	NaN	NaN	NaN	NaN	NaN	NaN	NaN	NaN	NaN	NaN	NaN	NaN	NaN	NaN	0.000791081	0.00020277
California Current Ecosystem	1106	1	2	NaN	NaN	NaN	NaN	NaN	NaN	2.4625	0.831719	0.075	0.0357071	1.10403	0.0695148	NaN	NaN	2.15	0.125831	0.435743	0.0561215	0.4525	0.108041	2.03333	0.150849	0.435	0.305	-0.01	0.35	NaN	NaN	NaN	NaN	NaN	NaN	NaN	NaN	0.168696	0.0814087	0.10992	0.0125604	0.862888	0.192952
California Current Ecosystem	1106	1	5	NaN	NaN	NaN	NaN	NaN	NaN	1.485	1.455	0.08	0.0127279	NaN	NaN	NaN	NaN	2.25	0.25	NaN	NaN	0.38	0.25	NaN	NaN	NaN	NaN	NaN	NaN	NaN	NaN	NaN	NaN	NaN	NaN	NaN	NaN	NaN	NaN	NaN	NaN	0.497152	0.101485
California Current Ecosystem	1106	1	8	NaN	NaN	NaN	NaN	NaN	NaN	3.20667	0.156198	0.101667	0.0137639	1.12772	0.0708823	NaN	NaN	2.35	0.100021	0.385159	0.0280106	0.628333	0.0345848	1.92917	0.143484	0.535	0.145204	0.075	0.145	NaN	NaN	NaN	NaN	NaN	NaN	NaN	NaN	0.170866	0.0552017	0.113317	0.0112298	0.350227	0.071494
California Current Ecosystem	1106	1	12	NaN	NaN	NaN	NaN	NaN	NaN	1.966	0.807741	0.072	0.0237487	1.15596	0.121984	NaN	NaN	2.1	0.114018	0.348645	0.0259025	0.38	0.104259	0.733333	0.733333	0.645	0.145982	0.45	0.36	NaN	NaN	NaN	NaN	NaN	NaN	NaN	NaN	0.173526	0.0204515	0.100293	0.00779891	0.24503	0.0500206
California Current Ecosystem	1106	1	20	NaN	NaN	NaN	NaN	NaN	NaN	2.73167	0.559937	0.09	0.0250333	0.996696	0.107761	NaN	NaN	2.25	0.10247	0.372617	0.0272865	0.551667	0.096174	1.45417	0.495833	0.69	0.1463	0.69	0.61	NaN	NaN	NaN	NaN	NaN	NaN	NaN	NaN	0.0979501	0.00763322	0.0857198	0.0261875	0.122931	0.0250973
California Current Ecosystem	1106	1	25	NaN	NaN	NaN	NaN	NaN	NaN	NaN	NaN	NaN	NaN	NaN	NaN	NaN	NaN	NaN	NaN	NaN	NaN	NaN	NaN	NaN	NaN	NaN	NaN	NaN	NaN	NaN	NaN	NaN	NaN	NaN	NaN	NaN	NaN	NaN	NaN	NaN	NaN	0.0817129	0.0166837
California Current Ecosystem	1106	1	30	NaN	NaN	NaN	NaN	NaN	NaN	2.3775	1.38557	0.105	0.0607591	NaN	NaN	NaN	NaN	2.75	0.551513	NaN	NaN	0.3475	0.1375	NaN	NaN	NaN	NaN	NaN	NaN	NaN	NaN	NaN	NaN	NaN	NaN	NaN	NaN	NaN	NaN	NaN	NaN	0.0626514	0.0143307
California Current Ecosystem	1106	1	35	NaN	NaN	NaN	NaN	NaN	NaN	4.55333	0.715782	0.146667	0.0328295	1.04701	0.0662225	NaN	NaN	3.33333	0.523874	0.357964	0.042393	0.616667	0.0768838	1.11667	0.808333	0.105	0.285	-0.13	0.3	NaN	NaN	NaN	NaN	NaN	NaN	NaN	NaN	0.0306665	0.0206849	0.0468209	0.00818194	0.0442912	0.011669
California Current Ecosystem	1106	1	40	NaN	NaN	NaN	NaN	NaN	NaN	0.02	0.012	0	0.01	NaN	NaN	NaN	NaN	1.8	0.19	NaN	NaN	0.13	0.013	NaN	NaN	NaN	NaN	NaN	NaN	NaN	NaN	NaN	NaN	NaN	NaN	NaN	NaN	NaN	NaN	NaN	NaN	0.0426334	0.0160022
California Current Ecosystem	1106	1	45	NaN	NaN	NaN	NaN	NaN	NaN	6.554	0.595992	0.102	0.038	0.810479	0.138218	NaN	NaN	5.14	0.49558	0.308731	0.076526	0.562	0.0581722	0.204167	0.0291667	-0.035	0.141174	0.16	0.142553	NaN	NaN	NaN	NaN	NaN	NaN	NaN	NaN	0.0238145	0.00239105	0.0172529	0.00192707	0.0273676	0.0100063
California Current Ecosystem	1106	1	50	NaN	NaN	NaN	NaN	NaN	NaN	NaN	NaN	NaN	NaN	NaN	NaN	NaN	NaN	NaN	NaN	NaN	NaN	NaN	NaN	NaN	NaN	NaN	NaN	NaN	NaN	NaN	NaN	NaN	NaN	NaN	NaN	NaN	NaN	NaN	NaN	NaN	NaN	0.0205228	0.00812448
California Current Ecosystem	1106	1	55	NaN	NaN	NaN	NaN	NaN	NaN	NaN	NaN	NaN	NaN	NaN	NaN	NaN	NaN	NaN	NaN	NaN	NaN	NaN	NaN	NaN	NaN	NaN	NaN	NaN	NaN	NaN	NaN	NaN	NaN	NaN	NaN	NaN	NaN	NaN	NaN	NaN	NaN	0.0152389	0.0062006
California Current Ecosystem	1106	1	60	NaN	NaN	NaN	NaN	NaN	NaN	8.68714	2.27267	0.0585714	0.0327638	0.396661	0.0435963	NaN	NaN	7.67143	1.56018	0.174021	0.0380256	0.222857	0.0183503	0.0541667	0.0125	0.095	0.142093	0.15	0.142482	NaN	NaN	NaN	NaN	NaN	NaN	NaN	NaN	0.00494755	0.00109019	0.00348091	0.000953245	0.0149202	0.0070142
California Current Ecosystem	1106	1	70	NaN	NaN	NaN	NaN	NaN	NaN	15.115	3.545	0.225	0.045	0.401918	0.0596135	NaN	NaN	14	3.9	0.325981	0.214437	0.14	0.02	0.025	0.0125	NaN	NaN	NaN	NaN	NaN	NaN	NaN	NaN	NaN	NaN	NaN	NaN	0.00271495	0.00127149	0.00726455	0.00172645	0.00741977	0.00338075
California Current Ecosystem	1106	1	80	NaN	NaN	NaN	NaN	NaN	NaN	15.0275	4.92339	0.1875	0.145108	0.580545	0.0680545	NaN	NaN	14.3	4.1063	0.82578	0.092578	0.245	0.0870345	0.0333333	0.0133333	-0.11	0.1989	0.09	0.2009	NaN	NaN	NaN	NaN	NaN	NaN	NaN	NaN	0.00603774	0.00160377	0.00477795	0.00147779	0.00293195	0.00113487
California Current Ecosystem	1106	1	90	NaN	NaN	NaN	NaN	NaN	NaN	2.75	0.285	0	0.01	NaN	NaN	NaN	NaN	4.1	0.42	NaN	NaN	0.34	0.034	NaN	NaN	NaN	NaN	NaN	NaN	NaN	NaN	NaN	NaN	NaN	NaN	NaN	NaN	NaN	NaN	NaN	NaN	0.00202709	0.00085627
California Current Ecosystem	1106	2	2	NaN	NaN	NaN	NaN	NaN	NaN	0.0433333	0.00827535	0.03	0.03	0.483052	0.0567727	NaN	NaN	1.83333	0.111621	0.0320764	0.00762544	0.11	0.00635085	0.391667	0.0347661	0.335	0.14379	0.385	0.205	NaN	NaN	NaN	NaN	NaN	NaN	NaN	NaN	0.0225811	0.010522	0.0035249	0.0009935	0.621847	0.219863
California Current Ecosystem	1106	2	5	NaN	NaN	NaN	NaN	NaN	NaN	NaN	NaN	NaN	NaN	NaN	NaN	NaN	NaN	NaN	NaN	NaN	NaN	NaN	NaN	NaN	NaN	NaN	NaN	NaN	NaN	NaN	NaN	NaN	NaN	NaN	NaN	NaN	NaN	NaN	NaN	NaN	NaN	0.429655	0.151913
California Current Ecosystem	1106	2	8	NaN	NaN	NaN	NaN	NaN	NaN	NaN	NaN	NaN	NaN	NaN	NaN	NaN	NaN	NaN	NaN	NaN	NaN	NaN	NaN	NaN	NaN	NaN	NaN	NaN	NaN	NaN	NaN	NaN	NaN	NaN	NaN	NaN	NaN	NaN	NaN	NaN	NaN	0.304846	0.107786
California Current Ecosystem	1106	2	12	NaN	NaN	NaN	NaN	NaN	NaN	0.025	0.00883883	0	0.00707107	0.539334	0.036912	NaN	NaN	1.8	0.13435	0.030611	0.00754083	0.113333	0.00881917	0.383333	0.0341768	0.37	0.144038	0.57	0.145452	NaN	NaN	NaN	NaN	NaN	NaN	NaN	NaN	0.0133896	0.00354005	0.00314385	0.000929411	0.231996	0.0820302
California Current Ecosystem	1106	2	20	NaN	NaN	NaN	NaN	NaN	NaN	0.025	0.00883883	0	0.00707107	0.507465	0.035072	NaN	NaN	1.7	0.127279	0.0342031	0.00774822	0.11	0.011	0.404167	0.0458333	0.39	0.144179	0.19	0.24	NaN	NaN	NaN	NaN	NaN	NaN	NaN	NaN	0.0132252	0.00386533	0.00351554	0.000955693	0.14955	0.0528809
California Current Ecosystem	1106	2	25	NaN	NaN	NaN	NaN	NaN	NaN	NaN	NaN	NaN	NaN	NaN	NaN	NaN	NaN	NaN	NaN	NaN	NaN	NaN	NaN	NaN	NaN	NaN	NaN	NaN	NaN	NaN	NaN	NaN	NaN	NaN	NaN	NaN	NaN	NaN	NaN	NaN	NaN	0.11902	0.0420868
California Current Ecosystem	1106	2	30	NaN	NaN	NaN	NaN	NaN	NaN	0.0233333	0.00712065	0.0166667	0.0166667	0.413235	0.0296317	NaN	NaN	1.76667	0.107772	0.037805	0.00795618	0.12	0.00848528	0.3375	0.0309359	0.295	0.143507	0.13	0.142341	NaN	NaN	NaN	NaN	NaN	NaN	NaN	NaN	0.0116766	0.00168187	0.00274554	0.000901246	0.0981348	0.034703
California Current Ecosystem	1106	2	35	NaN	NaN	NaN	NaN	NaN	NaN	NaN	NaN	NaN	NaN	NaN	NaN	NaN	NaN	NaN	NaN	NaN	NaN	NaN	NaN	NaN	NaN	NaN	NaN	NaN	NaN	NaN	NaN	NaN	NaN	NaN	NaN	NaN	NaN	NaN	NaN	NaN	NaN	0.0804826	0.028462
California Current Ecosystem	1106	2	40	NaN	NaN	NaN	NaN	NaN	NaN	0.025	0.00883883	0	0.00707107	0.529894	0.0363669	NaN	NaN	1.7	0.127279	0.0352679	0.0078097	0.14	0.014	0.35	0.05	0.35	0.143896	0.125	0.142305	NaN	NaN	NaN	NaN	NaN	NaN	NaN	NaN	0.00921799	0.00135892	0.00254602	0.000887138	0.0653823	0.0231232
California Current Ecosystem	1106	2	45	NaN	NaN	NaN	NaN	NaN	NaN	NaN	NaN	NaN	NaN	NaN	NaN	NaN	NaN	NaN	NaN	NaN	NaN	NaN	NaN	NaN	NaN	NaN	NaN	NaN	NaN	NaN	NaN	NaN	NaN	NaN	NaN	NaN	NaN	NaN	NaN	NaN	NaN	0.0526688	0.0186283
California Current Ecosystem	1106	2	50	NaN	NaN	NaN	NaN	NaN	NaN	NaN	NaN	NaN	NaN	NaN	NaN	NaN	NaN	NaN	NaN	NaN	NaN	NaN	NaN	NaN	NaN	NaN	NaN	NaN	NaN	NaN	NaN	NaN	NaN	NaN	NaN	NaN	NaN	NaN	NaN	NaN	NaN	0.0425606	0.0150545
California Current Ecosystem	1106	2	55	NaN	NaN	NaN	NaN	NaN	NaN	0.02	0.012	0.06	0.016	NaN	NaN	NaN	NaN	2.1	0.22	NaN	NaN	0.22	0.022	NaN	NaN	NaN	NaN	NaN	NaN	NaN	NaN	NaN	NaN	NaN	NaN	NaN	NaN	NaN	NaN	NaN	NaN	0.0344899	0.0122011
California Current Ecosystem	1106	2	60	NaN	NaN	NaN	NaN	NaN	NaN	0.01	0.00777817	0	0.00707107	0.412758	0.0296041	NaN	NaN	2.3	0.169706	0.0301329	0.00751323	0.22	0.022	0.1625	0.0291667	0.32	0.23	0.035	0.185	NaN	NaN	NaN	NaN	NaN	NaN	NaN	NaN	0.00221362	0.000863634	0.00175011	0.000830859	0.028198	0.00997659
California Current Ecosystem	1106	2	70	NaN	NaN	NaN	NaN	NaN	NaN	NaN	NaN	NaN	NaN	NaN	NaN	NaN	NaN	NaN	NaN	NaN	NaN	NaN	NaN	NaN	NaN	NaN	NaN	NaN	NaN	NaN	NaN	NaN	NaN	NaN	NaN	NaN	NaN	NaN	NaN	NaN	NaN	0.0168928	0.00597956
California Current Ecosystem	1106	2	80	NaN	NaN	NaN	NaN	NaN	NaN	0.793333	0.108064	0.0233333	0.0233333	0.506578	0.0387544	NaN	NaN	3.1	0.184752	0.0335607	0.00771113	0.45	0.0318198	0.183333	0.0200347	0.02	0.141563	-0.025	0.141245	NaN	NaN	NaN	NaN	NaN	NaN	NaN	NaN	0.0118724	0.0112085	0.00362898	0.000963715	0.00925619	0.00327963
California Current Ecosystem	1106	2	90	NaN	NaN	NaN	NaN	NaN	NaN	1.51	0.161	0	0.01	NaN	NaN	NaN	NaN	3.5	0.36	NaN	NaN	0.4	0.04	NaN	NaN	NaN	NaN	NaN	NaN	NaN	NaN	NaN	NaN	NaN	NaN	NaN	NaN	NaN	NaN	NaN	NaN	0.0049672	0.00176324
California Current Ecosystem	1106	2	100	NaN	NaN	NaN	NaN	NaN	NaN	5.245	0.705	0	0.00707107	0.317128	0.0287402	NaN	NaN	5.35	0.45	0.0356063	0.00782923	0.18	0.018	0.0416667	0.0100173	0.03	0.2003	0.03	0.2003	NaN	NaN	NaN	NaN	NaN	NaN	NaN	NaN	0.00607966	0.001137	0.00133062	0.000801196	0.00304675	0.00108426
California Current Ecosystem	1106	2	110	NaN	NaN	NaN	NaN	NaN	NaN	NaN	NaN	NaN	NaN	NaN	NaN	NaN	NaN	NaN	NaN	NaN	NaN	NaN	NaN	NaN	NaN	NaN	NaN	NaN	NaN	NaN	NaN	NaN	NaN	NaN	NaN	NaN	NaN	NaN	NaN	NaN	NaN	0.00152887	0.000547609
California Current Ecosystem	1106	2	120	NaN	NaN	NaN	NaN	NaN	NaN	11.55	1.165	0	0.01	NaN	NaN	NaN	NaN	10.6	1.07	NaN	NaN	NaN	NaN	NaN	NaN	NaN	NaN	NaN	NaN	NaN	NaN	NaN	NaN	NaN	NaN	NaN	NaN	NaN	NaN	NaN	NaN	0.00120137	0.000431821
California Current Ecosystem	1106	3	2	NaN	NaN	NaN	NaN	NaN	NaN	5.765	0.435249	0.5	0.177341	1.32005	0.229462	NaN	NaN	0.8	0.122474	0.27762	0.0309269	0.525	0.02625	2.62083	0.270833	0.445	0.144568	0.045	0.255	NaN	NaN	NaN	NaN	NaN	NaN	NaN	NaN	0.0861671	0.00974038	0.0577742	0.00479236	0.857857	0.247648
California Current Ecosystem	1106	3	5	NaN	NaN	NaN	NaN	NaN	NaN	5.26	0.73	0.235	0.235	1.42375	0.107746	NaN	NaN	0.55	0.05	0.220697	0.0367132	0.476667	0.0338296	3.00833	0.310833	0.62	0.2062	0.07	0.2007	NaN	NaN	NaN	NaN	NaN	NaN	NaN	NaN	0.10959	0.011959	0.0548599	0.00648599	0.569719	0.127397
California Current Ecosystem	1106	3	8	NaN	NaN	NaN	NaN	NaN	NaN	6.33	0.643	0.86	0.096	NaN	NaN	NaN	NaN	1	0.11	NaN	NaN	0.43	0.043	NaN	NaN	NaN	NaN	NaN	NaN	NaN	NaN	NaN	NaN	NaN	NaN	NaN	NaN	NaN	NaN	NaN	NaN	0.423651	0.0864814
California Current Ecosystem	1106	3	12	NaN	NaN	NaN	NaN	NaN	NaN	5.98333	0.306373	0.525	0.110537	1.34313	0.0833189	NaN	NaN	0.8	0.0930949	0.214349	0.0181489	0.498	0.0222712	2.6125	0.3125	0.665	0.146124	0.06	0.141846	NaN	NaN	NaN	NaN	NaN	NaN	NaN	NaN	0.0985331	0.0211475	0.0517383	0.0145638	0.288649	0.0721674
California Current Ecosystem	1106	3	20	NaN	NaN	NaN	NaN	NaN	NaN	6.9725	0.925512	0.5725	0.254669	1.08255	0.138373	NaN	NaN	1.15	0.377492	0.303592	0.0877914	0.6525	0.0779289	2.1875	0.161751	0.405	0.345	0.055	0.14181	NaN	NaN	NaN	NaN	NaN	NaN	NaN	NaN	0.0754294	0.00604077	0.0367834	0.00467834	0.133536	0.0236096
California Current Ecosystem	1106	3	25	NaN	NaN	NaN	NaN	NaN	NaN	8.5	1.92	0.54	0.18	1.06996	0.116996	NaN	NaN	1.6	0.6	0.82984	0.092984	0.55	0.16	2.13333	0.223333	0.5	0.205	0.19	0.2019	NaN	NaN	NaN	NaN	NaN	NaN	NaN	NaN	0.094887	0.0104887	0.169242	0.0179242	0.0849167	0.0160515
California Current Ecosystem	1106	3	30	NaN	NaN	NaN	NaN	NaN	NaN	9.71667	2.49657	0.253333	0.118509	1.08623	0.109808	NaN	NaN	2.16667	1.10504	0.461762	0.219863	0.56	0.123423	0.941667	0.073657	0.68	0.2068	0.03	0.2003	NaN	NaN	NaN	NaN	NaN	NaN	NaN	NaN	0.0434061	0.0106066	0.159677	0.132107	0.053057	0.0108343
California Current Ecosystem	1106	3	35	NaN	NaN	NaN	NaN	NaN	NaN	11.91	1.201	0.4	0.05	1.35412	0.145412	NaN	NaN	4.2	0.43	1.233	0.1333	0.84	0.084	1.1	0.12	0.26	0.2026	0.05	0.2005	NaN	NaN	NaN	NaN	NaN	NaN	NaN	NaN	0.029841	0.0039841	0.254661	0.0264661	0.0453709	0.0113477
California Current Ecosystem	1106	3	40	NaN	NaN	NaN	NaN	NaN	NaN	11.2825	1.2507	0.8	0.309973	1.38167	0.160235	NaN	NaN	5.15	2.01184	0.504166	0.108583	0.775	0.075	0.7375	0.0625	0.29	0.143472	0.025	0.141598	NaN	NaN	NaN	NaN	NaN	NaN	NaN	NaN	0.0208191	0.00217924	0.0406089	0.00993921	0.0277202	0.00693505
California Current Ecosystem	1106	3	45	NaN	NaN	NaN	NaN	NaN	NaN	22.48	2.258	0	0.01	NaN	NaN	NaN	NaN	21.6	2.17	NaN	NaN	0.47	0.047	NaN	NaN	NaN	NaN	NaN	NaN	NaN	NaN	NaN	NaN	NaN	NaN	NaN	NaN	NaN	NaN	NaN	NaN	0.0152037	0.00340413
California Current Ecosystem	1106	3	50	NaN	NaN	NaN	NaN	NaN	NaN	15.42	1.3	0.456667	0.224227	0.96641	0.0615692	NaN	NaN	10.7333	2.46937	0.627876	0.0477491	0.533333	0.0783865	0.166667	0.025	-0.075	0.140891	-0.17	0.140219	NaN	NaN	NaN	NaN	NaN	NaN	NaN	NaN	0.0121257	0.00770654	0.0186507	0.00202591	0.011422	0.00286051
California Current Ecosystem	1106	3	55	NaN	NaN	NaN	NaN	NaN	NaN	17.97	1.807	0.09	0.019	NaN	NaN	NaN	NaN	14.9	1.5	NaN	NaN	0.3	0.03	NaN	NaN	NaN	NaN	NaN	NaN	NaN	NaN	NaN	NaN	NaN	NaN	NaN	NaN	NaN	NaN	NaN	NaN	0.00842037	0.00298412
California Current Ecosystem	1106	3	60	NaN	NaN	NaN	NaN	NaN	NaN	19.34	2.27	0.065	0.0116673	0.5294	0.157396	NaN	NaN	17.7	2.7	0.499557	0.0423951	0.27	0.09	0.0666667	0.0166667	NaN	NaN	NaN	NaN	NaN	NaN	NaN	NaN	NaN	NaN	NaN	NaN	0.00766236	0.00176624	0.00733977	0.00173398	0.00566869	0.00201126
California Current Ecosystem	1106	3	70	NaN	NaN	NaN	NaN	NaN	NaN	24.56	2.466	0	0.01	NaN	NaN	NaN	NaN	24.4	2.45	NaN	NaN	NaN	NaN	NaN	NaN	NaN	NaN	NaN	NaN	NaN	NaN	NaN	NaN	NaN	NaN	NaN	NaN	NaN	NaN	NaN	NaN	0.0030909	0.00109987
California Current Ecosystem	1106	3	80	NaN	NaN	NaN	NaN	NaN	NaN	24.5	2.46	0.05	0.015	NaN	NaN	NaN	NaN	23.8	2.39	NaN	NaN	0.07	0.007	NaN	NaN	NaN	NaN	NaN	NaN	NaN	NaN	NaN	NaN	NaN	NaN	NaN	NaN	NaN	NaN	NaN	NaN	0.00111287	0.000368488
California Current Ecosystem	1106	4	2	NaN	NaN	NaN	NaN	NaN	NaN	0.248	0.114254	0.04	0.0252982	4.37088	0.371932	NaN	NaN	0.4	0.144914	2.56763	0.384976	3.184	0.685307	6.01667	0.432514	0.37	0.41	0.06	0.141846	NaN	NaN	NaN	NaN	NaN	NaN	NaN	NaN	0.0548281	0.0419553	0.103672	0.0128836	0.708414	0.177109
California Current Ecosystem	1106	4	5	NaN	NaN	NaN	NaN	NaN	NaN	0.18	0.18	0.045	0.045	NaN	NaN	NaN	NaN	0.55	0.05	NaN	NaN	2.445	0.172888	NaN	NaN	NaN	NaN	NaN	NaN	NaN	NaN	NaN	NaN	NaN	NaN	NaN	NaN	NaN	NaN	NaN	NaN	0.310729	0.0776872
California Current Ecosystem	1106	4	8	NaN	NaN	NaN	NaN	NaN	NaN	0.25	0.161658	0.0466667	0.024037	4.54308	0.587197	NaN	NaN	0.233333	0.185592	2.7439	0.478609	3.74667	1.17885	4.5875	1.0875	0.595	0.495	0.07	0.141916	NaN	NaN	NaN	NaN	NaN	NaN	NaN	NaN	0.0687854	0.0566331	0.103433	0.00802092	0.178164	0.0445459
California Current Ecosystem	1106	4	12	NaN	NaN	NaN	NaN	NaN	NaN	0.665	0.215604	0.111667	0.0446032	4.12805	0.342958	NaN	NaN	0.533333	0.174483	2.83559	0.503115	4.202	0.675873	3.49583	0.8625	0.84	0.57	0.285	0.143437	NaN	NaN	NaN	NaN	NaN	NaN	NaN	NaN	0.0542953	0.0468886	0.107715	0.00832371	0.082019	0.0205098
California Current Ecosystem	1106	4	20	NaN	NaN	NaN	NaN	NaN	NaN	1.35333	0.708339	0.3	0.115902	4.26088	0.676487	NaN	NaN	0.9	0.585947	3.09613	0.573918	4.72667	1.15008	0.725	0.0583363	0.675	0.485	0.025	0.141598	NaN	NaN	NaN	NaN	NaN	NaN	NaN	NaN	0.0126021	0.00159821	0.152299	0.0657087	0.0176239	0.00441097
California Current Ecosystem	1106	4	25	NaN	NaN	NaN	NaN	NaN	NaN	2.75	1.01593	0.542	0.224798	3.41662	1.33037	NaN	NaN	2.14	0.877268	2.02514	0.778659	4.75	1.94622	0.391667	0.258333	1.06	0.2106	0.01	0.2001	NaN	NaN	NaN	NaN	NaN	NaN	NaN	NaN	0.0242967	0.0169751	0.0692671	0.0502836	0.00537964	0.00134991
California Current Ecosystem	1106	4	30	NaN	NaN	NaN	NaN	NaN	NaN	4.47667	1.52927	0.51	0.121655	2.83801	0.993894	NaN	NaN	3.53333	1.41696	1.57459	0.723874	2.36	1.23423	0.141667	0.0666667	0.545	0.475	-0.08	0.140856	NaN	NaN	NaN	NaN	NaN	NaN	NaN	NaN	0.00698065	0.00129936	0.241549	0.226531	0.00203553	0.000513883
California Current Ecosystem	1106	4	35	NaN	NaN	NaN	NaN	NaN	NaN	6.068	1.15992	0.966	0.187339	2.07833	0.508044	NaN	NaN	5.04	1.00827	1.10525	0.489055	1.4	0.528678	0.0625	0.0208333	0.445	0.655	-0.03	0.141209	NaN	NaN	NaN	NaN	NaN	NaN	NaN	NaN	0.00549266	0.00154927	0.0141268	0.0089692	0.0010989	0.000279725
California Current Ecosystem	1106	5	2	NaN	NaN	NaN	NaN	NaN	NaN	0.012	0.008	0.046	0.0292575	0.676899	0.0732975	NaN	NaN	1.74	0.0979796	0.0427387	0.00824103	0.126	0.00678233	0.433333	0.0533333	0.185	0.14273	0.285	0.143437	NaN	NaN	NaN	NaN	NaN	NaN	NaN	NaN	0.00506759	0.00506759	0.002835	0.000907572	0.864554	0.249581
California Current Ecosystem	1106	5	5	NaN	NaN	NaN	NaN	NaN	NaN	NaN	NaN	NaN	NaN	NaN	NaN	NaN	NaN	NaN	NaN	NaN	NaN	0.13	0.00919239	0.441667	0.0383016	NaN	NaN	NaN	NaN	NaN	NaN	NaN	NaN	NaN	NaN	NaN	NaN	NaN	NaN	NaN	NaN	0.423762	0.105946
California Current Ecosystem	1106	5	8	NaN	NaN	NaN	NaN	NaN	NaN	NaN	NaN	NaN	NaN	NaN	NaN	NaN	NaN	NaN	NaN	NaN	NaN	NaN	NaN	NaN	NaN	NaN	NaN	NaN	NaN	NaN	NaN	NaN	NaN	NaN	NaN	NaN	NaN	NaN	NaN	NaN	NaN	0.324174	0.0810486
California Current Ecosystem	1106	5	12	NaN	NaN	NaN	NaN	NaN	NaN	0.01	0.00632456	0.032	0.0131909	0.808943	0.0524778	NaN	NaN	1.74	0.0822873	0.0394821	0.008053	0.122	0.00545601	0.466667	0.0566667	0.265	0.143295	0.13	0.142341	NaN	NaN	NaN	NaN	NaN	NaN	NaN	NaN	0.00507871	0.00507871	0.00405234	0.000993651	0.242225	0.0605612
California Current Ecosystem	1106	5	20	NaN	NaN	NaN	NaN	NaN	NaN	0.0075	0.005375	0.07	0.0267706	0.758569	0.111772	NaN	NaN	1.65	0.0875	0.0410834	0.00814546	0.13	0.00707107	0.408333	0.0508333	0.415	0.144356	0.355	0.143932	NaN	NaN	NaN	NaN	NaN	NaN	NaN	NaN	0.00306876	0.00306876	0.00346356	0.000952018	0.162812	0.040708
California Current Ecosystem	1106	5	25	NaN	NaN	NaN	NaN	NaN	NaN	0	0.01	0.05	0.015	NaN	NaN	NaN	NaN	1.8	0.19	NaN	NaN	0.13	0.013	NaN	NaN	NaN	NaN	NaN	NaN	NaN	NaN	NaN	NaN	NaN	NaN	NaN	NaN	NaN	NaN	NaN	NaN	0.123503	0.0308806
California Current Ecosystem	1106	5	30	NaN	NaN	NaN	NaN	NaN	NaN	0.00666667	0.0061584	0.02	0.02	0.998363	0.142383	NaN	NaN	1.8	0.109697	0.0525366	0.0138621	0.13	0.00750555	0.375	0.0475	0.695	0.146336	0.6	0.145664	NaN	NaN	NaN	NaN	NaN	NaN	NaN	NaN	0.00302217	0.00302217	0.00387393	0.000981035	0.0990864	0.0247766
California Current Ecosystem	1106	5	35	NaN	NaN	NaN	NaN	NaN	NaN	NaN	NaN	NaN	NaN	NaN	NaN	NaN	NaN	NaN	NaN	NaN	NaN	NaN	NaN	NaN	NaN	NaN	NaN	NaN	NaN	NaN	NaN	NaN	NaN	NaN	NaN	NaN	NaN	NaN	NaN	NaN	NaN	0.0809409	0.0202402
California Current Ecosystem	1106	5	40	NaN	NaN	NaN	NaN	NaN	NaN	0.0025	0.005125	0.0725	0.0495606	0.672738	0.044614	NaN	NaN	1.6	0.168325	0.0418777	0.00819131	0.1825	0.02529	0.366667	0.0416667	0.195	0.325	0.015	0.225	NaN	NaN	NaN	NaN	NaN	NaN	NaN	NaN	0.00101613	0.00101613	0.00421218	0.00100495	0.0649729	0.0162482
California Current Ecosystem	1106	5	45	NaN	NaN	NaN	NaN	NaN	NaN	0	0.01	0	0.01	NaN	NaN	NaN	NaN	1.7	0.18	NaN	NaN	0.24	0.024	NaN	NaN	NaN	NaN	NaN	NaN	NaN	NaN	NaN	NaN	NaN	NaN	NaN	NaN	NaN	NaN	NaN	NaN	0.0526189	0.0131597
California Current Ecosystem	1106	5	50	NaN	NaN	NaN	NaN	NaN	NaN	0.00666667	0.0061584	0	0.0057735	0.74321	0.133236	NaN	NaN	2.33333	0.433333	0.0424447	0.00926869	0.32	0.0378594	0.516667	0.0616667	0.29	0.143472	0.1	0.142128	NaN	NaN	NaN	NaN	NaN	NaN	NaN	NaN	0.00217575	0.000860956	0.00402917	0.0013748	0.0391334	0.00978835
California Current Ecosystem	1106	5	55	NaN	NaN	NaN	NaN	NaN	NaN	NaN	NaN	NaN	NaN	NaN	NaN	NaN	NaN	NaN	NaN	NaN	NaN	NaN	NaN	0.275	0.0375	NaN	NaN	NaN	NaN	NaN	NaN	NaN	NaN	NaN	NaN	NaN	NaN	NaN	NaN	NaN	NaN	0.0287859	0.00720147
California Current Ecosystem	1106	5	60	NaN	NaN	NaN	NaN	NaN	NaN	0.282	0.143819	0.058	0.0310483	0.799996	0.0519613	NaN	NaN	2.5	0.116276	0.0433385	0.00827565	0.57	0.0563028	0.491667	0.0591667	0.015	0.141527	-0.04	0.141139	NaN	NaN	NaN	NaN	NaN	NaN	NaN	NaN	0.00675734	0.0055359	0.00655531	0.00118555	0.0206867	0.00517667
California Current Ecosystem	1106	5	70	NaN	NaN	NaN	NaN	NaN	NaN	NaN	NaN	NaN	NaN	NaN	NaN	NaN	NaN	NaN	NaN	NaN	NaN	NaN	NaN	0.15	0.025	NaN	NaN	NaN	NaN	NaN	NaN	NaN	NaN	NaN	NaN	NaN	NaN	NaN	NaN	NaN	NaN	0.00933083	0.00233771
California Current Ecosystem	1106	5	80	NaN	NaN	NaN	NaN	NaN	NaN	5.28333	1.53421	0.0633333	0.0633333	0.432079	0.0799075	NaN	NaN	5.5	1.23423	0.0415664	0.00817334	0.43	0.0888819	0.179167	0.120833	-0.15	0.1985	0	0.2	NaN	NaN	NaN	NaN	NaN	NaN	NaN	NaN	0.00605909	0.00303944	0.00153786	0.00081585	0.00416915	0.00104729
California Current Ecosystem	1106	5	90	NaN	NaN	NaN	NaN	NaN	NaN	7.82	0.560029	0.05	0.0106066	NaN	NaN	NaN	NaN	7.35	0.526795	NaN	NaN	0.255	0.0180312	NaN	NaN	NaN	NaN	NaN	NaN	NaN	NaN	NaN	NaN	NaN	NaN	NaN	NaN	NaN	NaN	NaN	NaN	0.00222619	0.000561547
California Current Ecosystem	1106	5	100	NaN	NaN	NaN	NaN	NaN	NaN	NaN	NaN	NaN	NaN	NaN	NaN	NaN	NaN	NaN	NaN	NaN	NaN	NaN	NaN	NaN	NaN	NaN	NaN	NaN	NaN	NaN	NaN	NaN	NaN	NaN	NaN	NaN	NaN	NaN	NaN	NaN	NaN	0.00129645	0.000329113
California Current Ecosystem	1106	6	2	NaN	NaN	NaN	NaN	NaN	NaN	1.612	0.286974	0.16	0.0258844	1.15405	0.189553	NaN	NaN	1.48	0.124097	0.20983	0.0833828	NaN	NaN	1.83333	0.175	0.73	0.146583	0.235	0.143083	NaN	NaN	NaN	NaN	NaN	NaN	NaN	NaN	0.0978382	0.0244264	0.0497952	0.0302677	0.5721	0.165157
California Current Ecosystem	1106	6	5	NaN	NaN	NaN	NaN	NaN	NaN	NaN	NaN	NaN	NaN	NaN	NaN	NaN	NaN	NaN	NaN	NaN	NaN	NaN	NaN	NaN	NaN	NaN	NaN	NaN	NaN	NaN	NaN	NaN	NaN	NaN	NaN	NaN	NaN	NaN	NaN	NaN	NaN	0.352513	0.0881334
California Current Ecosystem	1106	6	8	NaN	NaN	NaN	NaN	NaN	NaN	NaN	NaN	NaN	NaN	NaN	NaN	NaN	NaN	NaN	NaN	NaN	NaN	NaN	NaN	NaN	NaN	NaN	NaN	NaN	NaN	NaN	NaN	NaN	NaN	NaN	NaN	NaN	NaN	NaN	NaN	NaN	NaN	0.234805	0.0587063
California Current Ecosystem	1106	6	12	NaN	NaN	NaN	NaN	NaN	NaN	1.91	0.116047	0.113333	0.0592546	1.1699	0.0843849	NaN	NaN	1.46667	0.0904515	0.226376	0.0966876	NaN	NaN	1.4375	0.108718	0.82	0.14722	0.21	0.142906	NaN	NaN	NaN	NaN	NaN	NaN	NaN	NaN	0.0839372	0.0315903	0.0335072	0.0110113	0.158632	0.0396629
California Current Ecosystem	1106	6	20	NaN	NaN	NaN	NaN	NaN	NaN	2.744	0.240741	0.204	0.059127	1.93621	0.769641	NaN	NaN	1.52	0.0969536	0.228561	0.0870064	NaN	NaN	0.904167	0.154167	0.76	0.146795	0.13	0.142341	NaN	NaN	NaN	NaN	NaN	NaN	NaN	NaN	0.0438859	0.0219531	0.0384207	0.0219568	0.0857799	0.02145
California Current Ecosystem	1106	6	25	NaN	NaN	NaN	NaN	NaN	NaN	NaN	NaN	NaN	NaN	NaN	NaN	NaN	NaN	NaN	NaN	NaN	NaN	NaN	NaN	NaN	NaN	NaN	NaN	NaN	NaN	NaN	NaN	NaN	NaN	NaN	NaN	NaN	NaN	NaN	NaN	NaN	NaN	0.0607832	0.0152008
California Current Ecosystem	1106	6	30	NaN	NaN	NaN	NaN	NaN	NaN	3.18	0.973499	0.163333	0.0983757	1.20797	0.0987838	NaN	NaN	1.53333	0.133333	0.163775	0.0355086	NaN	NaN	1.57917	0.9125	0.63	0.145876	0.23	0.18	NaN	NaN	NaN	NaN	NaN	NaN	NaN	NaN	0.0152791	0.00384425	0.041671	0.00546296	0.0434246	0.0108612
California Current Ecosystem	1106	6	35	NaN	NaN	NaN	NaN	NaN	NaN	3.86	1	0.36	0.08	NaN	NaN	NaN	NaN	1.75	0.15	NaN	NaN	NaN	NaN	NaN	NaN	NaN	NaN	NaN	NaN	NaN	NaN	NaN	NaN	NaN	NaN	NaN	NaN	NaN	NaN	NaN	NaN	0.0304077	0.00760692
California Current Ecosystem	1106	6	40	NaN	NaN	NaN	NaN	NaN	NaN	2.73667	1.18423	0.126667	0.0751295	0.979389	0.17024	NaN	NaN	1.9	0.264575	0.125483	0.0299567	NaN	NaN	0.3625	0.0327037	0.265	0.143295	0.06	0.141846	NaN	NaN	NaN	NaN	NaN	NaN	NaN	NaN	0.00728554	0.0012592	0.0195259	0.00882983	0.0209979	0.00525447
California Current Ecosystem	1106	6	45	NaN	NaN	NaN	NaN	NaN	NaN	NaN	NaN	NaN	NaN	NaN	NaN	NaN	NaN	NaN	NaN	NaN	NaN	NaN	NaN	NaN	NaN	NaN	NaN	NaN	NaN	NaN	NaN	NaN	NaN	NaN	NaN	NaN	NaN	NaN	NaN	NaN	NaN	0.0144626	0.00362065
California Current Ecosystem	1106	6	50	NaN	NaN	NaN	NaN	NaN	NaN	3.38	1.05216	0.2175	0.0782491	0.78357	0.0721078	NaN	NaN	2.675	0.368273	0.0773423	0.0102389	NaN	NaN	0.175	0.0194454	0.17	0.142623	0.1	0.142128	NaN	NaN	NaN	NaN	NaN	NaN	NaN	NaN	0.00885838	0.00301647	0.0134562	0.00785291	0.00992316	0.00248579
California Current Ecosystem	1106	6	55	NaN	NaN	NaN	NaN	NaN	NaN	4.47	0.457	0.48	0.058	NaN	NaN	NaN	NaN	1.9	0.2	NaN	NaN	NaN	NaN	NaN	NaN	NaN	NaN	NaN	NaN	NaN	NaN	NaN	NaN	NaN	NaN	NaN	NaN	NaN	NaN	NaN	NaN	0.00621953	0.0018012
California Current Ecosystem	1106	6	60	NaN	NaN	NaN	NaN	NaN	NaN	5.77667	1.68909	0.12	0.06	0.832666	0.0913834	NaN	NaN	4.4	1.10151	0.0727357	0.0102858	NaN	NaN	0.1	0.0141421	-0.095	0.14075	-0.035	0.141174	NaN	NaN	NaN	NaN	NaN	NaN	NaN	NaN	0.00790505	0.00213121	0.00596838	0.00173794	0.00465642	0.00116911
California Current Ecosystem	1106	6	70	NaN	NaN	NaN	NaN	NaN	NaN	9.492	1.48092	0.034	0.0208806	0.647889	0.0431794	NaN	NaN	7.98	1.32642	0.0735869	0.0115661	NaN	NaN	0.0458333	0.010312	NaN	NaN	NaN	NaN	NaN	NaN	NaN	NaN	NaN	NaN	NaN	NaN	0.00712788	0.00121112	0.003169	0.000931189	0.00223103	0.000562759
California Current Ecosystem	1106	6	80	NaN	NaN	NaN	NaN	NaN	NaN	NaN	NaN	NaN	NaN	NaN	NaN	NaN	NaN	NaN	NaN	NaN	NaN	NaN	NaN	NaN	NaN	NaN	NaN	NaN	NaN	NaN	NaN	NaN	NaN	NaN	NaN	NaN	NaN	NaN	NaN	NaN	NaN	0.00118084	0.00030021
California Current Ecosystem	1208	1	2	0.803789	0.184509	0.463366	0.261476	0.73031	0.335792	1.28571	0.30943	0.00142857	0.00383364	3.70998	0.597365	NaN	NaN	0.428571	0.12289	NaN	NaN	2.63714	0.575081	8.59778	0.808026	NaN	NaN	NaN	NaN	NaN	NaN	NaN	NaN	NaN	NaN	NaN	NaN	NaN	NaN	NaN	NaN	NaN	NaN
California Current Ecosystem	1208	1	5	NaN	NaN	NaN	NaN	NaN	NaN	NaN	NaN	NaN	NaN	NaN	NaN	NaN	NaN	NaN	NaN	NaN	NaN	1.78	0.178	NaN	NaN	NaN	NaN	NaN	NaN	NaN	NaN	NaN	NaN	NaN	NaN	NaN	NaN	NaN	NaN	NaN	NaN	NaN	NaN
California Current Ecosystem	1208	1	8	0.589692	0.0711667	0.396084	0.159324	0.704769	0.202964	1.3275	0.427188	0.02	0.0122474	4.13231	0.761829	NaN	NaN	0.475	0.225	NaN	NaN	3.18833	0.610314	6.52583	0.382543	NaN	NaN	NaN	NaN	NaN	NaN	NaN	NaN	NaN	NaN	NaN	NaN	NaN	NaN	NaN	NaN	NaN	NaN
California Current Ecosystem	1208	1	12	0.596902	0.0942838	0.571135	0.141058	0.368477	0.0589516	1.4775	0.40165	0.0325	0.02136	4.37198	0.905025	NaN	NaN	0.275	0.103078	NaN	NaN	3.28714	0.609265	5.46361	0.591155	NaN	NaN	NaN	NaN	NaN	NaN	NaN	NaN	NaN	NaN	NaN	NaN	NaN	NaN	NaN	NaN	NaN	NaN
California Current Ecosystem	1208	1	20	0.514299	0.0881583	0.485427	0.22353	0.441576	0.173763	2.03	0.409858	0.07	0.0412311	6.37799	1.9291	NaN	NaN	0.2	0.0408248	NaN	NaN	3.75875	0.471049	1.48056	0.485317	NaN	NaN	NaN	NaN	NaN	NaN	NaN	NaN	NaN	NaN	NaN	NaN	NaN	NaN	NaN	NaN	NaN	NaN
California Current Ecosystem	1208	1	25	0.312608	0.0681568	0.637771	0.142767	0.306788	0.101471	2.235	0.28701	0.07	0.03937	4.70075	0.49056	NaN	NaN	0.225	0.131498	NaN	NaN	4.18	0.862276	0.312778	0.159131	NaN	NaN	NaN	NaN	NaN	NaN	NaN	NaN	NaN	NaN	NaN	NaN	NaN	NaN	NaN	NaN	NaN	NaN
California Current Ecosystem	1208	1	30	0.274684	0.0163737	0.707572	0.173099	0.375486	0.0881221	2.46	0.156152	0.1075	0.0368273	4.27588	0.346629	NaN	NaN	0.25	0.119024	NaN	NaN	5.01333	0.758378	0.161667	0.106149	NaN	NaN	NaN	NaN	NaN	NaN	NaN	NaN	NaN	NaN	NaN	NaN	NaN	NaN	NaN	NaN	NaN	NaN
California Current Ecosystem	1208	1	35	NaN	NaN	NaN	NaN	NaN	NaN	NaN	NaN	NaN	NaN	NaN	NaN	NaN	NaN	NaN	NaN	NaN	NaN	NaN	NaN	NaN	NaN	NaN	NaN	NaN	NaN	NaN	NaN	NaN	NaN	NaN	NaN	NaN	NaN	NaN	NaN	NaN	NaN	NaN	NaN
California Current Ecosystem	1208	2	2	0.282568	0.0283568	0.00295173	0.000395173	0.122394	0.0123394	0.45	0.0479583	0.005	0.005	1.00048	0.0847939	NaN	NaN	2.83333	0.119753	NaN	NaN	0.408	0.0356931	2.36167	0.246167	NaN	NaN	NaN	NaN	NaN	NaN	NaN	NaN	NaN	NaN	NaN	NaN	NaN	NaN	NaN	NaN	NaN	NaN
California Current Ecosystem	1208	2	5	NaN	NaN	NaN	NaN	NaN	NaN	NaN	NaN	NaN	NaN	NaN	NaN	NaN	NaN	NaN	NaN	NaN	NaN	NaN	NaN	NaN	NaN	NaN	NaN	NaN	NaN	NaN	NaN	NaN	NaN	NaN	NaN	NaN	NaN	NaN	NaN	NaN	NaN	NaN	NaN
California Current Ecosystem	1208	2	8	NaN	NaN	NaN	NaN	NaN	NaN	NaN	NaN	NaN	NaN	NaN	NaN	NaN	NaN	NaN	NaN	NaN	NaN	NaN	NaN	NaN	NaN	NaN	NaN	NaN	NaN	NaN	NaN	NaN	NaN	NaN	NaN	NaN	NaN	NaN	NaN	NaN	NaN	NaN	NaN
California Current Ecosystem	1208	2	12	0.250813	0.0251813	0.0140972	0.00150972	0.0918647	0.00928647	0.4	0.085049	0.0133333	0.0133333	0.841984	0.0543855	NaN	NaN	2.93333	0.176383	NaN	NaN	0.385	0.0290115	2.0225	0.756667	NaN	NaN	NaN	NaN	NaN	NaN	NaN	NaN	NaN	NaN	NaN	NaN	NaN	NaN	NaN	NaN	NaN	NaN
California Current Ecosystem	1208	2	20	0.231517	0.0232517	0.0258143	0.00268143	0.113626	0.0114626	0.686667	0.161692	0.0533333	0.0533333	0.829407	0.117031	NaN	NaN	3.1	0.305505	NaN	NaN	0.398	0.0217715	1.73083	0.550833	NaN	NaN	NaN	NaN	NaN	NaN	NaN	NaN	NaN	NaN	NaN	NaN	NaN	NaN	NaN	NaN	NaN	NaN
California Current Ecosystem	1208	2	25	NaN	NaN	NaN	NaN	NaN	NaN	NaN	NaN	NaN	NaN	NaN	NaN	NaN	NaN	NaN	NaN	NaN	NaN	NaN	NaN	NaN	NaN	NaN	NaN	NaN	NaN	NaN	NaN	NaN	NaN	NaN	NaN	NaN	NaN	NaN	NaN	NaN	NaN	NaN	NaN
California Current Ecosystem	1208	2	30	0.219198	0.0220198	0.0210507	0.00220507	0.135355	0.0136355	1.07	0.366106	0.156667	0.156667	0.819984	0.155152	NaN	NaN	2.96667	0.440959	NaN	NaN	0.4425	0.0743163	1.28083	0.62	NaN	NaN	NaN	NaN	NaN	NaN	NaN	NaN	NaN	NaN	NaN	NaN	NaN	NaN	NaN	NaN	NaN	NaN
California Current Ecosystem	1208	2	35	NaN	NaN	NaN	NaN	NaN	NaN	NaN	NaN	NaN	NaN	NaN	NaN	NaN	NaN	NaN	NaN	NaN	NaN	0.655	0.095	NaN	NaN	NaN	NaN	NaN	NaN	NaN	NaN	NaN	NaN	NaN	NaN	NaN	NaN	NaN	NaN	NaN	NaN	NaN	NaN
California Current Ecosystem	1208	2	40	0.292301	0.0293301	0.0275125	0.00285125	0.139728	0.0140728	1.55667	0.48447	0.0833333	0.0833333	1.04279	0.470165	NaN	NaN	3.23333	0.688799	NaN	NaN	0.66	0.178699	1.2825	0.6275	NaN	NaN	NaN	NaN	NaN	NaN	NaN	NaN	NaN	NaN	NaN	NaN	NaN	NaN	NaN	NaN	NaN	NaN
California Current Ecosystem	1208	2	45	NaN	NaN	NaN	NaN	NaN	NaN	NaN	NaN	NaN	NaN	NaN	NaN	NaN	NaN	NaN	NaN	NaN	NaN	NaN	NaN	NaN	NaN	NaN	NaN	NaN	NaN	NaN	NaN	NaN	NaN	NaN	NaN	NaN	NaN	NaN	NaN	NaN	NaN	NaN	NaN
California Current Ecosystem	1208	2	50	0.240176	0.0241176	0.00208447	0.000308447	0.0757274	0.00767274	1.945	0.911505	0.0025	0.005125	1.10689	0.518739	NaN	NaN	3.575	0.775	NaN	NaN	0.67	0.247588	0.543333	0.206667	NaN	NaN	NaN	NaN	NaN	NaN	NaN	NaN	NaN	NaN	NaN	NaN	NaN	NaN	NaN	NaN	NaN	NaN
California Current Ecosystem	1208	2	55	NaN	NaN	NaN	NaN	NaN	NaN	NaN	NaN	NaN	NaN	NaN	NaN	NaN	NaN	NaN	NaN	NaN	NaN	0.645	0.055	NaN	NaN	NaN	NaN	NaN	NaN	NaN	NaN	NaN	NaN	NaN	NaN	NaN	NaN	NaN	NaN	NaN	NaN	NaN	NaN
California Current Ecosystem	1208	2	60	0.148184	0.0149184	0.000472975	0.000147297	0.085921	0.0086921	3.69	2.385	0	0.0057735	0.568189	0.0825553	NaN	NaN	5.23333	1.44376	NaN	NaN	0.413333	0.0717248	0.195417	0.0320833	NaN	NaN	NaN	NaN	NaN	NaN	NaN	NaN	NaN	NaN	NaN	NaN	NaN	NaN	NaN	NaN	NaN	NaN
California Current Ecosystem	1208	2	70	0.0503373	0.00513373	0.00257665	0.000357665	0.0394812	0.00404812	10.51	4.78499	0	0.0057735	1.9965	1.54852	NaN	NaN	10.6667	3.87054	NaN	NaN	0.326667	0.0742369	0.100833	0.0408333	NaN	NaN	NaN	NaN	NaN	NaN	NaN	NaN	NaN	NaN	NaN	NaN	NaN	NaN	NaN	NaN	NaN	NaN
California Current Ecosystem	1208	3	2	0.486963	0.0643856	0.0147896	0.00836669	0.279411	0.0161895	0.794	0.0889157	0.218	0.0539815	2.13142	0.166472	NaN	NaN	0.68	0.135647	NaN	NaN	0.862	0.0935628	3.70042	0.272083	NaN	NaN	NaN	NaN	NaN	NaN	NaN	NaN	NaN	NaN	NaN	NaN	NaN	NaN	NaN	NaN	1.35845	0.48029
California Current Ecosystem	1208	3	5	NaN	NaN	NaN	NaN	NaN	NaN	NaN	NaN	NaN	NaN	NaN	NaN	NaN	NaN	NaN	NaN	NaN	NaN	NaN	NaN	NaN	NaN	NaN	NaN	NaN	NaN	NaN	NaN	NaN	NaN	NaN	NaN	NaN	NaN	NaN	NaN	NaN	NaN	0.37717	0.133357
California Current Ecosystem	1208	3	8	0.594948	0.0610786	0.0155636	0.00764359	0.370537	0.0214507	0.87	0.159478	0.28	0.145717	2.18044	0.249591	NaN	NaN	0.733333	0.185592	NaN	NaN	0.832	0.0821219	3.0325	0.221501	NaN	NaN	NaN	NaN	NaN	NaN	NaN	NaN	NaN	NaN	NaN	NaN	NaN	NaN	NaN	NaN	0.23226	0.0821233
California Current Ecosystem	1208	3	12	0.524078	0.0823147	0.0112633	0.00585681	0.244023	0.0645623	0.88	0.085049	0.36	0.215484	3.10007	0.918278	NaN	NaN	0.733333	0.185592	NaN	NaN	0.858	0.0939361	2.70333	0.198226	NaN	NaN	NaN	NaN	NaN	NaN	NaN	NaN	NaN	NaN	NaN	NaN	NaN	NaN	NaN	NaN	0.122916	0.0434645
California Current Ecosystem	1208	3	20	0.452851	0.113598	0.0488151	0.0367664	0.401115	0.110272	1.16	0.0907377	0.443333	0.233619	2.17947	0.291774	NaN	NaN	0.566667	0.185592	NaN	NaN	1.016	0.156288	1.19292	0.190417	NaN	NaN	NaN	NaN	NaN	NaN	NaN	NaN	NaN	NaN	NaN	NaN	NaN	NaN	NaN	NaN	0.039777	0.0140704
California Current Ecosystem	1208	3	25	0.374446	0.122507	0.0455268	0.0258318	0.239263	0.0138716	1.38	0.0854478	0.59	0.242487	1.93495	0.279043	NaN	NaN	0.6	0.11547	NaN	NaN	1.102	0.142913	0.602917	0.0504167	NaN	NaN	NaN	NaN	NaN	NaN	NaN	NaN	NaN	NaN	NaN	NaN	NaN	NaN	NaN	NaN	0.0225711	0.00798715
California Current Ecosystem	1208	3	30	0.215952	0.0140985	0.0627463	0.0171932	0.281825	0.0469402	1.47333	0.0908364	0.703333	0.256537	1.851	0.326447	NaN	NaN	0.533333	0.185592	NaN	NaN	0.95	0.185203	0.1875	0.0203293	NaN	NaN	NaN	NaN	NaN	NaN	NaN	NaN	NaN	NaN	NaN	NaN	NaN	NaN	NaN	NaN	0.0116327	0.00411986
California Current Ecosystem	1208	3	35	NaN	NaN	NaN	NaN	NaN	NaN	NaN	NaN	NaN	NaN	NaN	NaN	NaN	NaN	NaN	NaN	NaN	NaN	1.2	0.12	NaN	NaN	NaN	NaN	NaN	NaN	NaN	NaN	NaN	NaN	NaN	NaN	NaN	NaN	NaN	NaN	NaN	NaN	0.00583946	0.00207163
California Current Ecosystem	1208	3	40	0.211681	0.0777603	0.12887	0.0107825	0.288317	0.0546542	2.17667	0.343382	0.943333	0.45568	1.57701	0.176756	NaN	NaN	1.06667	0.120185	NaN	NaN	0.925	0.0644851	0.0345833	0.00951648	NaN	NaN	NaN	NaN	NaN	NaN	NaN	NaN	NaN	NaN	NaN	NaN	NaN	NaN	NaN	NaN	0.00323136	0.00114953
California Current Ecosystem	1208	3	45	NaN	NaN	NaN	NaN	NaN	NaN	NaN	NaN	NaN	NaN	NaN	NaN	NaN	NaN	NaN	NaN	NaN	NaN	0.97	0.097	NaN	NaN	NaN	NaN	NaN	NaN	NaN	NaN	NaN	NaN	NaN	NaN	NaN	NaN	NaN	NaN	NaN	NaN	0.00177699	0.000635331
California Current Ecosystem	1208	4	2	0.0761608	0.014332	5.94275e-05	6.11661e-05	0.0608321	0.0147963	0.026	0.0107703	0.018	0.0111355	0.498402	0.0947447	NaN	NaN	2.92	0.135059	NaN	NaN	0.092	0.00969536	0.265833	0.0258683	NaN	NaN	NaN	NaN	NaN	NaN	NaN	NaN	NaN	NaN	NaN	NaN	NaN	NaN	NaN	NaN	0.702948	0.324226
California Current Ecosystem	1208	4	5	NaN	NaN	NaN	NaN	NaN	NaN	NaN	NaN	NaN	NaN	NaN	NaN	NaN	NaN	NaN	NaN	NaN	NaN	NaN	NaN	NaN	NaN	NaN	NaN	NaN	NaN	NaN	NaN	NaN	NaN	NaN	NaN	NaN	NaN	NaN	NaN	NaN	NaN	0.267068	0.10846
California Current Ecosystem	1208	4	8	NaN	NaN	NaN	NaN	NaN	NaN	NaN	NaN	NaN	NaN	NaN	NaN	NaN	NaN	NaN	NaN	NaN	NaN	NaN	NaN	NaN	NaN	NaN	NaN	NaN	NaN	NaN	NaN	NaN	NaN	NaN	NaN	NaN	NaN	NaN	NaN	NaN	NaN	0.198968	0.0795453
California Current Ecosystem	1208	4	12	0.0984766	0.00596981	0.000467373	0.000185895	0.108741	0.0140381	0	0.0057735	0	0.0057735	0.708096	0.238059	NaN	NaN	2.9	0.173205	NaN	NaN	0.1	0.02	0.250833	0.0248077	NaN	NaN	NaN	NaN	NaN	NaN	NaN	NaN	NaN	NaN	NaN	NaN	NaN	NaN	NaN	NaN	0.14662	0.0582138
California Current Ecosystem	1208	4	20	NaN	NaN	NaN	NaN	NaN	NaN	NaN	NaN	NaN	NaN	NaN	NaN	NaN	NaN	NaN	NaN	NaN	NaN	0.11	0.011	NaN	NaN	NaN	NaN	NaN	NaN	NaN	NaN	NaN	NaN	NaN	NaN	NaN	NaN	NaN	NaN	NaN	NaN	0.108181	0.0401272
California Current Ecosystem	1208	4	25	0.100882	0.0207404	0.00170889	0.00126117	0.0619066	0.0101346	0.01	0.00635085	0.00333333	0.00596595	0.528234	0.082487	NaN	NaN	2.9	0.173205	NaN	NaN	0.106667	0.0218581	0.237083	0.0304167	NaN	NaN	NaN	NaN	NaN	NaN	NaN	NaN	NaN	NaN	NaN	NaN	NaN	NaN	NaN	NaN	0.0919354	0.0331283
California Current Ecosystem	1208	4	30	NaN	NaN	NaN	NaN	NaN	NaN	NaN	NaN	NaN	NaN	NaN	NaN	NaN	NaN	NaN	NaN	NaN	NaN	0.12	0.012	NaN	NaN	NaN	NaN	NaN	NaN	NaN	NaN	NaN	NaN	NaN	NaN	NaN	NaN	NaN	NaN	NaN	NaN	0.0760699	0.0271229
California Current Ecosystem	1208	4	35	NaN	NaN	NaN	NaN	NaN	NaN	NaN	NaN	NaN	NaN	NaN	NaN	NaN	NaN	NaN	NaN	NaN	NaN	NaN	NaN	NaN	NaN	NaN	NaN	NaN	NaN	NaN	NaN	NaN	NaN	NaN	NaN	NaN	NaN	NaN	NaN	NaN	NaN	0.0645393	0.0226961
California Current Ecosystem	1208	4	40	0.120727	0.0514893	0.00291033	0.00251071	0.0811406	0.0205717	0.356667	0.336716	0.0533333	0.0533333	0.583396	0.182797	NaN	NaN	3	0.178979	NaN	NaN	0.185	0.0533073	0.196667	0.03	NaN	NaN	NaN	NaN	NaN	NaN	NaN	NaN	NaN	NaN	NaN	NaN	NaN	NaN	NaN	NaN	0.0523999	0.0191034
California Current Ecosystem	1208	4	45	NaN	NaN	NaN	NaN	NaN	NaN	NaN	NaN	NaN	NaN	NaN	NaN	NaN	NaN	NaN	NaN	NaN	NaN	NaN	NaN	NaN	NaN	NaN	NaN	NaN	NaN	NaN	NaN	NaN	NaN	NaN	NaN	NaN	NaN	NaN	NaN	NaN	NaN	0.0404555	0.0156011
California Current Ecosystem	1208	4	50	0.0942821	0.0202436	0.00236053	0.000920572	0.0425379	0.012441	0.313333	0.240439	0.103333	0.0883805	0.59097	0.0398932	NaN	NaN	3.06667	0.182828	NaN	NaN	0.196	0.0350143	0.155833	0.0383333	NaN	NaN	NaN	NaN	NaN	NaN	NaN	NaN	NaN	NaN	NaN	NaN	NaN	NaN	NaN	NaN	0.0296339	0.0115846
California Current Ecosystem	1208	4	55	NaN	NaN	NaN	NaN	NaN	NaN	NaN	NaN	NaN	NaN	NaN	NaN	NaN	NaN	NaN	NaN	NaN	NaN	NaN	NaN	NaN	NaN	NaN	NaN	NaN	NaN	NaN	NaN	NaN	NaN	NaN	NaN	NaN	NaN	NaN	NaN	NaN	NaN	0.0215277	0.00840535
California Current Ecosystem	1208	4	60	0.110109	0.00641491	0.00291943	0.000351654	0.0604052	0.0301356	0.826667	0.135319	0.163333	0.0433333	0.637544	0.0977905	NaN	NaN	3.36667	0.200148	NaN	NaN	0.238	0.0298998	0.175417	0.03875	NaN	NaN	NaN	NaN	NaN	NaN	NaN	NaN	NaN	NaN	NaN	NaN	NaN	NaN	NaN	NaN	0.014991	0.0062559
California Current Ecosystem	1208	4	70	NaN	NaN	NaN	NaN	NaN	NaN	NaN	NaN	NaN	NaN	NaN	NaN	NaN	NaN	NaN	NaN	NaN	NaN	NaN	NaN	NaN	NaN	NaN	NaN	NaN	NaN	NaN	NaN	NaN	NaN	NaN	NaN	NaN	NaN	NaN	NaN	NaN	NaN	0.00584765	0.00393866
California Current Ecosystem	1208	4	80	0.0645593	0.0128397	0.00323966	0.00082377	0.0532147	0.0142563	1.14333	0.643359	0.126667	0.0352767	0.534585	0.104905	NaN	NaN	3.76667	0.425572	NaN	NaN	0.28	0.014	0.0791667	0.0166667	NaN	NaN	NaN	NaN	NaN	NaN	NaN	NaN	NaN	NaN	NaN	NaN	NaN	NaN	NaN	NaN	0.00442563	0.0019932
California Current Ecosystem	1208	4	90	NaN	NaN	NaN	NaN	NaN	NaN	NaN	NaN	NaN	NaN	NaN	NaN	NaN	NaN	NaN	NaN	NaN	NaN	0.27	0.027	NaN	NaN	NaN	NaN	NaN	NaN	NaN	NaN	NaN	NaN	NaN	NaN	NaN	NaN	NaN	NaN	NaN	NaN	0.00259361	0.00108913
California Current Ecosystem	1208	4	100	0.0391413	0.0085363	0.0021709	0.000756231	0.048084	0.0148792	5.92333	1.67253	0.00333333	0.00596595	0.383229	0.0868574	NaN	NaN	6.83333	1.1865	NaN	NaN	0.146667	0.031798	0.0166667	0.00824958	NaN	NaN	NaN	NaN	NaN	NaN	NaN	NaN	NaN	NaN	NaN	NaN	NaN	NaN	NaN	NaN	0.00154284	0.000641969
California Current Ecosystem	1208	4	110	NaN	NaN	NaN	NaN	NaN	NaN	NaN	NaN	NaN	NaN	NaN	NaN	NaN	NaN	NaN	NaN	NaN	NaN	0.135	0.00954594	NaN	NaN	NaN	NaN	NaN	NaN	NaN	NaN	NaN	NaN	NaN	NaN	NaN	NaN	NaN	NaN	NaN	NaN	0.000918453	0.000384765
California Current Ecosystem	1208	5	2	0.261535	0.0306123	0.0404075	0.0295675	0.133947	0.0466792	1.65	0.101036	0.07	0.0264575	1.35661	0.24852	NaN	NaN	2.26667	0.272845	NaN	NaN	0.59	0.0550757	3.83583	0.393583	NaN	NaN	NaN	NaN	NaN	NaN	NaN	NaN	NaN	NaN	NaN	NaN	NaN	NaN	NaN	NaN	NaN	NaN
California Current Ecosystem	1208	5	5	NaN	NaN	NaN	NaN	NaN	NaN	NaN	NaN	NaN	NaN	NaN	NaN	NaN	NaN	NaN	NaN	NaN	NaN	0.67	0.067	NaN	NaN	NaN	NaN	NaN	NaN	NaN	NaN	NaN	NaN	NaN	NaN	NaN	NaN	NaN	NaN	NaN	NaN	0.368908	0.130436
California Current Ecosystem	1208	5	8	NaN	NaN	NaN	NaN	NaN	NaN	NaN	NaN	NaN	NaN	NaN	NaN	NaN	NaN	NaN	NaN	NaN	NaN	NaN	NaN	NaN	NaN	NaN	NaN	NaN	NaN	NaN	NaN	NaN	NaN	NaN	NaN	NaN	NaN	NaN	NaN	NaN	NaN	0.251147	0.0888009
California Current Ecosystem	1208	5	12	0.266054	0.0350788	0.0724329	0.0259647	0.0855484	0.0533924	1.63	0.14	0.06	0.04	1.41578	0.26163	NaN	NaN	2.25	0.35	NaN	NaN	0.54	0.11	3.1725	0.32725	NaN	NaN	NaN	NaN	NaN	NaN	NaN	NaN	NaN	NaN	NaN	NaN	NaN	NaN	NaN	NaN	0.163015	0.0576416
California Current Ecosystem	1208	5	20	0.368279	0.0356479	0.10387	0.0949968	0.177499	0.0916017	1.57	0.118087	0.105	0.075	1.51148	0.377901	NaN	NaN	2	0.4	NaN	NaN	0.616667	0.0983757	2.16667	0.226667	NaN	NaN	NaN	NaN	NaN	NaN	NaN	NaN	NaN	NaN	NaN	NaN	NaN	NaN	NaN	NaN	0.0761357	0.0269251
California Current Ecosystem	1208	5	25	NaN	NaN	NaN	NaN	NaN	NaN	NaN	NaN	NaN	NaN	NaN	NaN	NaN	NaN	NaN	NaN	NaN	NaN	NaN	NaN	NaN	NaN	NaN	NaN	NaN	NaN	NaN	NaN	NaN	NaN	NaN	NaN	NaN	NaN	NaN	NaN	NaN	NaN	0.0503638	0.0178134
California Current Ecosystem	1208	5	30	0.220098	0.0262688	0.021884	0.00827129	0.127449	0.0529629	0.865	0.725	0.095	0.095	1.08355	0.461008	NaN	NaN	2.3	0.4	NaN	NaN	0.363333	0.0742369	0.298333	0.0398333	NaN	NaN	NaN	NaN	NaN	NaN	NaN	NaN	NaN	NaN	NaN	NaN	NaN	NaN	NaN	NaN	0.031295	0.0110715
California Current Ecosystem	1208	5	35	NaN	NaN	NaN	NaN	NaN	NaN	NaN	NaN	NaN	NaN	NaN	NaN	NaN	NaN	NaN	NaN	NaN	NaN	NaN	NaN	NaN	NaN	NaN	NaN	NaN	NaN	NaN	NaN	NaN	NaN	NaN	NaN	NaN	NaN	NaN	NaN	NaN	NaN	0.0214115	0.00757717
California Current Ecosystem	1208	5	40	0.203661	0.0204661	0.00694477	0.000794477	0.138203	0.0139203	2.17	0.44	0.135	0.025	1.21377	0.197738	NaN	NaN	3.25	1.35	NaN	NaN	0.655	0.135	0.225	0.0325	NaN	NaN	NaN	NaN	NaN	NaN	NaN	NaN	NaN	NaN	NaN	NaN	NaN	NaN	NaN	NaN	0.0153304	0.0054272
California Current Ecosystem	1208	5	45	NaN	NaN	NaN	NaN	NaN	NaN	NaN	NaN	NaN	NaN	NaN	NaN	NaN	NaN	NaN	NaN	NaN	NaN	0.33	0.033	NaN	NaN	NaN	NaN	NaN	NaN	NaN	NaN	NaN	NaN	NaN	NaN	NaN	NaN	NaN	NaN	NaN	NaN	0.0114021	0.00403832
California Current Ecosystem	1208	5	50	0.108327	0.0109327	0.121992	0.0122992	0.0527458	0.00537458	1.575	0.745	0.17	0.09	0.876995	0.16297	NaN	NaN	3.45	0.35	NaN	NaN	0.69	0.31	0.1375	0.02375	NaN	NaN	NaN	NaN	NaN	NaN	NaN	NaN	NaN	NaN	NaN	NaN	NaN	NaN	NaN	NaN	0.00805165	0.00285376
California Current Ecosystem	1208	5	55	NaN	NaN	NaN	NaN	NaN	NaN	NaN	NaN	NaN	NaN	NaN	NaN	NaN	NaN	NaN	NaN	NaN	NaN	NaN	NaN	NaN	NaN	NaN	NaN	NaN	NaN	NaN	NaN	NaN	NaN	NaN	NaN	NaN	NaN	NaN	NaN	NaN	NaN	0.00560681	0.00198938
California Current Ecosystem	1208	5	60	0.0588854	0.00598854	0.594229	0.0595229	0.135058	0.0136058	2.93	2.38	0.27	0.026163	1.31859	0.819237	NaN	NaN	3.6	0.3	NaN	NaN	1.4	1.0352	0.0975	0.01975	NaN	NaN	NaN	NaN	NaN	NaN	NaN	NaN	NaN	NaN	NaN	NaN	NaN	NaN	NaN	NaN	0.00421895	0.00211948
California Current Ecosystem	1208	5	70	0.0845582	0.00855582	0.119883	0.0120883	0.0960398	0.00970398	6.205	2.895	0.285	0.075	0.623782	0.223999	NaN	NaN	5.75	1.55	NaN	NaN	0.79	0.21	0.00166667	0.0101667	NaN	NaN	NaN	NaN	NaN	NaN	NaN	NaN	NaN	NaN	NaN	NaN	NaN	NaN	NaN	NaN	0.00233358	0.00117679
California Current Ecosystem	1208	5	80	NaN	NaN	NaN	NaN	NaN	NaN	5.79	0.589	1.34	0.144	2.10217	0.220217	NaN	NaN	1.4	0.15	NaN	NaN	2.18	0.218	NaN	NaN	NaN	NaN	NaN	NaN	NaN	NaN	NaN	NaN	NaN	NaN	NaN	NaN	NaN	NaN	NaN	NaN	0.00122365	0.000621824
California Current Ecosystem	1408	1	2	NaN	NaN	NaN	NaN	NaN	NaN	0.0328571	0.0132223	0.0157143	0.00437359	2.20126	0.334993	NaN	NaN	0.217143	0.0675318	NaN	NaN	0.560056	0.0604979	1.23056	0.261411	NaN	NaN	NaN	NaN	NaN	NaN	NaN	NaN	NaN	NaN	NaN	NaN	NaN	NaN	NaN	NaN	0.411694	0.118852
California Current Ecosystem	1408	1	5	NaN	NaN	NaN	NaN	NaN	NaN	0.05	0.0106066	0.015	0.00813173	1.81098	0.194823	10.2016	1.03016	0.13	0.0162635	NaN	NaN	0.556942	0.0393818	NaN	NaN	NaN	NaN	NaN	NaN	NaN	NaN	NaN	NaN	NaN	NaN	NaN	NaN	NaN	NaN	NaN	NaN	0.236543	0.0356632
California Current Ecosystem	1408	1	8	NaN	NaN	NaN	NaN	NaN	NaN	0.06	0.0108012	0.015	0.00645497	1.90783	0.0897931	NaN	NaN	0.27	0.105751	NaN	NaN	0.564308	0.0252366	NaN	NaN	NaN	NaN	NaN	NaN	NaN	NaN	NaN	NaN	NaN	NaN	NaN	NaN	NaN	NaN	NaN	NaN	0.165963	0.0284164
California Current Ecosystem	1408	1	12	NaN	NaN	NaN	NaN	NaN	NaN	0.052	0.00679765	0.024	0.00678233	2.06351	0.141353	NaN	NaN	0.298	0.0642184	NaN	NaN	0.645883	0.0901176	1.01722	0.143483	NaN	NaN	NaN	NaN	NaN	NaN	NaN	NaN	NaN	NaN	NaN	NaN	NaN	NaN	NaN	NaN	0.100751	0.0152939
California Current Ecosystem	1408	1	20	NaN	NaN	NaN	NaN	NaN	NaN	0.1675	0.0849877	0.05	0.0204124	2.60314	0.437286	NaN	NaN	0.7	0.221848	NaN	NaN	0.912453	0.208503	0.769167	0.147343	NaN	NaN	NaN	NaN	NaN	NaN	NaN	NaN	NaN	NaN	NaN	NaN	NaN	NaN	NaN	NaN	0.0458535	0.00725323
California Current Ecosystem	1408	1	25	NaN	NaN	NaN	NaN	NaN	NaN	1.29	0.11	0.095	0.035	4.3814	0.790426	10.3354	1.04354	1.72	0.128693	NaN	NaN	3.29956	0.233314	1.14208	0.0878286	NaN	NaN	NaN	NaN	NaN	NaN	NaN	NaN	NaN	NaN	NaN	NaN	NaN	NaN	NaN	NaN	0.0247582	0.00436075
California Current Ecosystem	1408	1	30	NaN	NaN	NaN	NaN	NaN	NaN	3.07167	1.32721	0.151667	0.0322921	3.18895	0.379854	NaN	NaN	3.15833	1.08327	NaN	NaN	2.87616	0.591143	0.582083	0.0482306	NaN	NaN	NaN	NaN	NaN	NaN	NaN	NaN	NaN	NaN	NaN	NaN	NaN	NaN	NaN	NaN	0.0119845	0.00174649
California Current Ecosystem	1408	1	35	NaN	NaN	NaN	NaN	NaN	NaN	5.945	0.427446	0.21	0.03	2.53896	0.281541	9.59377	0.969377	5.185	0.373706	NaN	NaN	4.38439	0.354064	0.1925	0.02925	NaN	NaN	NaN	NaN	NaN	NaN	NaN	NaN	NaN	NaN	NaN	NaN	NaN	NaN	NaN	NaN	0.0061374	0.00134237
California Current Ecosystem	1408	1	40	NaN	NaN	NaN	NaN	NaN	NaN	7.855	2.30612	0.165	0.0417333	2.37304	0.481005	9.69306	0.979306	7.01	2.13259	NaN	NaN	3.78661	0.938131	0.0358333	0.00960487	NaN	NaN	NaN	NaN	NaN	NaN	NaN	NaN	NaN	NaN	NaN	NaN	NaN	NaN	NaN	NaN	0.00248693	0.00046611
California Current Ecosystem	1408	1	45	NaN	NaN	NaN	NaN	NaN	NaN	10.65	1.075	0.18	0.028	2.17444	0.227444	NaN	NaN	9.37	0.947	NaN	NaN	3.89334	0.389334	0.02	0.012	NaN	NaN	NaN	NaN	NaN	NaN	NaN	NaN	NaN	NaN	NaN	NaN	NaN	NaN	NaN	NaN	0.00118979	0.000182383
California Current Ecosystem	1408	1	50	NaN	NaN	NaN	NaN	NaN	NaN	14.9675	0.787606	0.07	0.0204124	0.820394	0.174931	8.83155	0.631556	13.5175	0.680875	NaN	NaN	1.28675	0.490575	0.0341667	0.0134167	NaN	NaN	NaN	NaN	NaN	NaN	NaN	NaN	NaN	NaN	NaN	NaN	NaN	NaN	NaN	NaN	0.000774972	0.000119847
California Current Ecosystem	1408	2	2	NaN	NaN	NaN	NaN	NaN	NaN	0.0457143	0.0165985	0.0171429	0.00473804	1.6452	0.141125	NaN	NaN	0.218571	0.0276396	NaN	NaN	0.662919	0.0516622	1.26722	0.0789366	NaN	NaN	NaN	NaN	NaN	NaN	NaN	NaN	NaN	NaN	NaN	NaN	NaN	NaN	NaN	NaN	0.986078	0.207096
California Current Ecosystem	1408	2	5	NaN	NaN	NaN	NaN	NaN	NaN	0.04	0.014	0.01	0.011	1.7267	0.18267	10.3432	1.04432	0.16	0.026	NaN	NaN	0.694487	0.0694487	NaN	NaN	NaN	NaN	NaN	NaN	NaN	NaN	NaN	NaN	NaN	NaN	NaN	NaN	NaN	NaN	NaN	NaN	0.332668	0.055448
California Current Ecosystem	1408	2	8	NaN	NaN	NaN	NaN	NaN	NaN	0.0533333	0.00625981	0.01	0.00449073	1.57537	0.0940425	10.3349	1.04349	0.231667	0.0272539	NaN	NaN	0.661416	0.0624538	NaN	NaN	NaN	NaN	NaN	NaN	NaN	NaN	NaN	NaN	NaN	NaN	NaN	NaN	NaN	NaN	NaN	NaN	0.210097	0.0332224
California Current Ecosystem	1408	2	12	NaN	NaN	NaN	NaN	NaN	NaN	0.0516667	0.00619177	0.00666667	0.00435465	1.7596	0.186221	10.3005	1.04005	0.221667	0.0328041	NaN	NaN	0.650142	0.0502875	0.984444	0.0720795	NaN	NaN	NaN	NaN	NaN	NaN	NaN	NaN	NaN	NaN	NaN	NaN	NaN	NaN	NaN	NaN	0.124066	0.0206809
California Current Ecosystem	1408	2	20	NaN	NaN	NaN	NaN	NaN	NaN	0.04	0.014	0.01	0.011	1.66708	0.176708	10.1808	1.02808	0.15	0.025	NaN	NaN	0.832783	0.0832783	NaN	NaN	NaN	NaN	NaN	NaN	NaN	NaN	NaN	NaN	NaN	NaN	NaN	NaN	NaN	NaN	NaN	NaN	0.0534698	0.00891496
California Current Ecosystem	1408	2	25	NaN	NaN	NaN	NaN	NaN	NaN	0.092	0.0302324	0.02	0.0114018	1.69471	0.113688	NaN	NaN	0.266	0.0276767	NaN	NaN	0.796405	0.0526156	0.401667	0.0547363	NaN	NaN	NaN	NaN	NaN	NaN	NaN	NaN	NaN	NaN	NaN	NaN	NaN	NaN	NaN	NaN	0.0316052	0.00559061
California Current Ecosystem	1408	2	30	NaN	NaN	NaN	NaN	NaN	NaN	3.86	1.91518	0.0866667	0.0409607	1.47639	0.379456	10.9458	1.10458	3.44	1.64502	NaN	NaN	0.850821	0.0941203	NaN	NaN	NaN	NaN	NaN	NaN	NaN	NaN	NaN	NaN	NaN	NaN	NaN	NaN	NaN	NaN	NaN	NaN	0.0179733	0.00249523
California Current Ecosystem	1408	2	35	NaN	NaN	NaN	NaN	NaN	NaN	3.624	1.37808	0.062	0.020347	1.25806	0.155385	8.95649	0.64039	3.312	1.09961	NaN	NaN	1.09615	0.0583036	0.134167	0.015486	NaN	NaN	NaN	NaN	NaN	NaN	NaN	NaN	NaN	NaN	NaN	NaN	NaN	NaN	NaN	NaN	0.0106274	0.0016835
California Current Ecosystem	1408	2	40	NaN	NaN	NaN	NaN	NaN	NaN	4.325	4.235	0.03	0.02	1.213	0.639992	11.1794	1.12794	3.93	3.68	NaN	NaN	0.732819	0.0518181	NaN	NaN	NaN	NaN	NaN	NaN	NaN	NaN	NaN	NaN	NaN	NaN	NaN	NaN	NaN	NaN	NaN	NaN	0.00640212	0.00143603
California Current Ecosystem	1408	2	45	NaN	NaN	NaN	NaN	NaN	NaN	8.028	0.869778	0.052	0.0193391	0.818745	0.0675279	NaN	NaN	7.206	0.801652	NaN	NaN	0.802418	0.0566444	0.0419444	0.00819517	NaN	NaN	NaN	NaN	NaN	NaN	NaN	NaN	NaN	NaN	NaN	NaN	NaN	NaN	NaN	NaN	0.00383661	0.000534816
California Current Ecosystem	1408	2	50	NaN	NaN	NaN	NaN	NaN	NaN	NaN	NaN	NaN	NaN	NaN	NaN	NaN	NaN	NaN	NaN	NaN	NaN	NaN	NaN	NaN	NaN	NaN	NaN	NaN	NaN	NaN	NaN	NaN	NaN	NaN	NaN	NaN	NaN	NaN	NaN	NaN	NaN	0.00256755	0.000528181
California Current Ecosystem	1408	2	55	NaN	NaN	NaN	NaN	NaN	NaN	13.185	2.015	0.01	0.00777817	0.646074	0.0527554	8.48699	0.858699	11.75	2.42	NaN	NaN	0.417143	0.0563707	0.0125	0.01125	NaN	NaN	NaN	NaN	NaN	NaN	NaN	NaN	NaN	NaN	NaN	NaN	NaN	NaN	NaN	NaN	0.00165723	0.00037504
California Current Ecosystem	1408	3	2	NaN	NaN	NaN	NaN	NaN	NaN	0.0385714	0.011635	0.0157143	0.00437359	1.21841	0.171428	NaN	NaN	1.05857	0.0485224	NaN	NaN	0.185239	0.00772017	0.486111	0.0386411	NaN	NaN	NaN	NaN	NaN	NaN	NaN	NaN	NaN	NaN	NaN	NaN	NaN	NaN	NaN	NaN	0.660611	0.184976
California Current Ecosystem	1408	3	5	NaN	NaN	NaN	NaN	NaN	NaN	NaN	NaN	NaN	NaN	NaN	NaN	NaN	NaN	NaN	NaN	NaN	NaN	NaN	NaN	NaN	NaN	NaN	NaN	NaN	NaN	NaN	NaN	NaN	NaN	NaN	NaN	NaN	NaN	NaN	NaN	NaN	NaN	0.254519	0.0447096
California Current Ecosystem	1408	3	8	NaN	NaN	NaN	NaN	NaN	NaN	0.044	0.00927362	0.014	0.00509823	1.13691	0.152743	NaN	NaN	1.114	0.0542917	NaN	NaN	0.185227	0.0132582	NaN	NaN	NaN	NaN	NaN	NaN	NaN	NaN	NaN	NaN	NaN	NaN	NaN	NaN	NaN	NaN	NaN	NaN	0.226445	0.0427978
California Current Ecosystem	1408	3	12	NaN	NaN	NaN	NaN	NaN	NaN	0.0366667	0.00557939	0.0133333	0.00462681	1.17245	0.16885	NaN	NaN	1.05833	0.0713403	NaN	NaN	0.23107	0.0169332	0.498889	0.0345769	NaN	NaN	NaN	NaN	NaN	NaN	NaN	NaN	NaN	NaN	NaN	NaN	NaN	NaN	NaN	NaN	0.146814	0.0277489
California Current Ecosystem	1408	3	20	NaN	NaN	NaN	NaN	NaN	NaN	0.65	0.075	0.02	0.012	1.55036	0.165036	NaN	NaN	1.93	0.203	NaN	NaN	0.616319	0.0616319	NaN	NaN	NaN	NaN	NaN	NaN	NaN	NaN	NaN	NaN	NaN	NaN	NaN	NaN	NaN	NaN	NaN	NaN	0.0744309	0.0140699
California Current Ecosystem	1408	3	25	NaN	NaN	NaN	NaN	NaN	NaN	0.573333	0.226328	0.025	0.0051031	1.36788	0.0684685	NaN	NaN	1.75667	0.216851	NaN	NaN	0.510844	0.0647018	0.772222	0.0699112	NaN	NaN	NaN	NaN	NaN	NaN	NaN	NaN	NaN	NaN	NaN	NaN	NaN	NaN	NaN	NaN	0.0388308	0.00859569
California Current Ecosystem	1408	3	30	NaN	NaN	NaN	NaN	NaN	NaN	NaN	NaN	NaN	NaN	NaN	NaN	NaN	NaN	NaN	NaN	NaN	NaN	NaN	NaN	NaN	NaN	NaN	NaN	NaN	NaN	NaN	NaN	NaN	NaN	NaN	NaN	NaN	NaN	NaN	NaN	NaN	NaN	0.0368131	0.0053164
California Current Ecosystem	1408	3	35	NaN	NaN	NaN	NaN	NaN	NaN	3.476	0.585112	0.158	0.0389102	1.21052	0.167172	NaN	NaN	3.296	0.407181	NaN	NaN	0.697117	0.0578051	0.375833	0.0307807	NaN	NaN	NaN	NaN	NaN	NaN	NaN	NaN	NaN	NaN	NaN	NaN	NaN	NaN	NaN	NaN	0.0244944	0.00408573
California Current Ecosystem	1408	3	40	NaN	NaN	NaN	NaN	NaN	NaN	4.21	0.6	0.225	0.145	1.09243	0.0843176	NaN	NaN	3.765	0.445	NaN	NaN	0.634358	0.0448559	NaN	NaN	NaN	NaN	NaN	NaN	NaN	NaN	NaN	NaN	NaN	NaN	NaN	NaN	NaN	NaN	NaN	NaN	0.0150806	0.00266944
California Current Ecosystem	1408	3	45	NaN	NaN	NaN	NaN	NaN	NaN	7.08	0.769708	0.2125	0.147104	0.922424	0.145027	NaN	NaN	5.355	0.480651	NaN	NaN	0.624211	0.0798202	0.11	0.0148492	NaN	NaN	NaN	NaN	NaN	NaN	NaN	NaN	NaN	NaN	NaN	NaN	NaN	NaN	NaN	NaN	0.00805969	0.00134661
California Current Ecosystem	1408	3	50	NaN	NaN	NaN	NaN	NaN	NaN	7.96	1.21132	0.15	0.102632	0.738536	0.0581405	NaN	NaN	5.36333	0.700484	NaN	NaN	0.547171	0.0812897	0.0725	0.01725	NaN	NaN	NaN	NaN	NaN	NaN	NaN	NaN	NaN	NaN	NaN	NaN	NaN	NaN	NaN	NaN	0.00507869	0.000806174
California Current Ecosystem	1408	3	55	NaN	NaN	NaN	NaN	NaN	NaN	9.59333	1.02177	0.1	0.0568624	0.798212	0.084887	NaN	NaN	7.54667	1.18068	NaN	NaN	0.437938	0.0643074	0.035	0.0135	NaN	NaN	NaN	NaN	NaN	NaN	NaN	NaN	NaN	NaN	NaN	NaN	NaN	NaN	NaN	NaN	0.00277088	0.000522564
California Current Ecosystem	1408	3	60	NaN	NaN	NaN	NaN	NaN	NaN	10.8033	1.20861	0.113333	0.0548736	0.992508	0.153517	NaN	NaN	8.25	1.12303	NaN	NaN	0.391839	0.158947	0.01625	0.00822012	NaN	NaN	NaN	NaN	NaN	NaN	NaN	NaN	NaN	NaN	NaN	NaN	NaN	NaN	NaN	NaN	0.00193634	0.000392414
California Current Ecosystem	1408	4	2	NaN	NaN	NaN	NaN	NaN	NaN	0.05	0.0152753	0.02	0.01	0.404803	0.0342611	NaN	NaN	2.10667	0.127402	NaN	NaN	0.115948	0.00846368	NaN	NaN	NaN	NaN	NaN	NaN	NaN	NaN	NaN	NaN	NaN	NaN	NaN	NaN	NaN	NaN	NaN	NaN	1.07057	0.309053
California Current Ecosystem	1408	4	5	NaN	NaN	NaN	NaN	NaN	NaN	0.0225	0.0131498	0.005	0.00525	0.467643	0.0283822	NaN	NaN	2.1025	0.110125	NaN	NaN	0.0914708	0.00457354	0.185	0.0164545	NaN	NaN	NaN	NaN	NaN	NaN	NaN	NaN	NaN	NaN	NaN	NaN	NaN	NaN	NaN	NaN	0.42002	0.120209
California Current Ecosystem	1408	4	8	NaN	NaN	NaN	NaN	NaN	NaN	NaN	NaN	NaN	NaN	NaN	NaN	NaN	NaN	NaN	NaN	NaN	NaN	NaN	NaN	NaN	NaN	NaN	NaN	NaN	NaN	NaN	NaN	NaN	NaN	NaN	NaN	NaN	NaN	NaN	NaN	NaN	NaN	0.307773	0.0628279
California Current Ecosystem	1408	4	12	NaN	NaN	NaN	NaN	NaN	NaN	0.05	0.00566947	0.00571429	0.00399562	0.471202	0.0215894	NaN	NaN	2.08	0.0823963	NaN	NaN	0.105096	0.00866167	0.181944	0.0162781	NaN	NaN	NaN	NaN	NaN	NaN	NaN	NaN	NaN	NaN	NaN	NaN	NaN	NaN	NaN	NaN	0.216884	0.0470683
California Current Ecosystem	1408	4	20	NaN	NaN	NaN	NaN	NaN	NaN	0.055	0.0109602	0.01	0.00777817	0.499022	0.0373814	NaN	NaN	1.99	0.147785	NaN	NaN	0.124316	0.00879048	NaN	NaN	NaN	NaN	NaN	NaN	NaN	NaN	NaN	NaN	NaN	NaN	NaN	NaN	NaN	NaN	NaN	NaN	0.143057	0.0357145
California Current Ecosystem	1408	4	25	NaN	NaN	NaN	NaN	NaN	NaN	0.04	0.01	0.005	0.00742462	0.533897	0.159076	NaN	NaN	2.16	0.18	NaN	NaN	0.10996	0.00777538	0.184167	0.0200936	NaN	NaN	NaN	NaN	NaN	NaN	NaN	NaN	NaN	NaN	NaN	NaN	NaN	NaN	NaN	NaN	0.129924	0.0245571
California Current Ecosystem	1408	4	30	NaN	NaN	NaN	NaN	NaN	NaN	0.0533333	0.0088527	0.00666667	0.0061584	0.608489	0.146885	NaN	NaN	2.1	0.127017	NaN	NaN	0.136091	0.0245374	0.1425	0.02425	NaN	NaN	NaN	NaN	NaN	NaN	NaN	NaN	NaN	NaN	NaN	NaN	NaN	NaN	NaN	NaN	0.1095	0.0182534
California Current Ecosystem	1408	4	35	NaN	NaN	NaN	NaN	NaN	NaN	0.055	0.0109602	0.02	0.01	0.49748	0.0344955	NaN	NaN	2.26	0.166877	NaN	NaN	0.162197	0.0127774	NaN	NaN	NaN	NaN	NaN	NaN	NaN	NaN	NaN	NaN	NaN	NaN	NaN	NaN	NaN	NaN	NaN	NaN	0.0789374	0.0149215
California Current Ecosystem	1408	4	40	NaN	NaN	NaN	NaN	NaN	NaN	0.035	0.00954594	0.005	0.00742462	0.644164	0.0526203	NaN	NaN	2.355	0.173595	NaN	NaN	0.169563	0.0119899	0.130417	0.0162929	NaN	NaN	NaN	NaN	NaN	NaN	NaN	NaN	NaN	NaN	NaN	NaN	NaN	NaN	NaN	NaN	0.0538747	0.0101851
California Current Ecosystem	1408	4	45	NaN	NaN	NaN	NaN	NaN	NaN	NaN	NaN	NaN	NaN	NaN	NaN	NaN	NaN	NaN	NaN	NaN	NaN	NaN	NaN	NaN	NaN	NaN	NaN	NaN	NaN	NaN	NaN	NaN	NaN	NaN	NaN	NaN	NaN	NaN	NaN	NaN	NaN	0.0282577	0.00820077
California Current Ecosystem	1408	4	50	NaN	NaN	NaN	NaN	NaN	NaN	0.0425	0.007125	0.0125	0.00629153	0.461702	0.0697375	NaN	NaN	2.37	0.1235	NaN	NaN	0.236607	0.0330728	0.101667	0.0201667	NaN	NaN	NaN	NaN	NaN	NaN	NaN	NaN	NaN	NaN	NaN	NaN	NaN	NaN	NaN	NaN	0.0280244	0.00534879
California Current Ecosystem	1408	4	55	NaN	NaN	NaN	NaN	NaN	NaN	0.17	0.027	0.02	0.012	0.621619	0.0721619	NaN	NaN	2.62	0.272	NaN	NaN	0.216463	0.0216463	NaN	NaN	NaN	NaN	NaN	NaN	NaN	NaN	NaN	NaN	NaN	NaN	NaN	NaN	NaN	NaN	NaN	NaN	0.0197054	0.00297371
California Current Ecosystem	1408	4	60	NaN	NaN	NaN	NaN	NaN	NaN	0.0825	0.0193111	0.0225	0.00946485	0.494888	0.0355279	NaN	NaN	2.51	0.1305	NaN	NaN	0.285987	0.0176948	0.102222	0.0125861	NaN	NaN	NaN	NaN	NaN	NaN	NaN	NaN	NaN	NaN	NaN	NaN	NaN	NaN	NaN	NaN	0.0146574	0.00299601
California Current Ecosystem	1408	4	70	NaN	NaN	NaN	NaN	NaN	NaN	1.70286	0.225259	0.101429	0.0274667	0.49505	0.0637404	NaN	NaN	3.51	0.150111	NaN	NaN	0.321259	0.0169236	0.0669444	0.00963854	NaN	NaN	NaN	NaN	NaN	NaN	NaN	NaN	NaN	NaN	NaN	NaN	NaN	NaN	NaN	NaN	0.00651325	0.00125967
California Current Ecosystem	1408	4	80	NaN	NaN	NaN	NaN	NaN	NaN	5.275	0.665	0.02	0.01	0.286245	0.0386245	NaN	NaN	5.46	0.393151	NaN	NaN	0.282605	0.0199832	NaN	NaN	NaN	NaN	NaN	NaN	NaN	NaN	NaN	NaN	NaN	NaN	NaN	NaN	NaN	NaN	NaN	NaN	0.00416059	0.000696765
California Current Ecosystem	1408	4	90	NaN	NaN	NaN	NaN	NaN	NaN	6.234	0.548385	0.018	0.00583095	0.266102	0.0227074	NaN	NaN	5.826	0.398065	NaN	NaN	0.173471	0.0249262	NaN	NaN	NaN	NaN	NaN	NaN	NaN	NaN	NaN	NaN	NaN	NaN	NaN	NaN	NaN	NaN	NaN	NaN	0.00176005	0.000375057
California Current Ecosystem	1408	4	100	NaN	NaN	NaN	NaN	NaN	NaN	10.1	0.513241	0.0125	0.005625	0.181536	0.0312481	NaN	NaN	8.515	0.452815	NaN	NaN	0.100565	0.0104354	NaN	NaN	NaN	NaN	NaN	NaN	NaN	NaN	NaN	NaN	NaN	NaN	NaN	NaN	NaN	NaN	NaN	NaN	0.00113556	0.000192593
California Current Ecosystem	1408	5	2	NaN	NaN	NaN	NaN	NaN	NaN	0	0.01	0.00333333	0.00596595	0.314157	0.0756593	NaN	NaN	2.32	0.139719	NaN	NaN	0.0865854	0.00499901	NaN	NaN	NaN	NaN	NaN	NaN	NaN	NaN	NaN	NaN	NaN	NaN	NaN	NaN	NaN	NaN	NaN	NaN	0.826539	0.350556
California Current Ecosystem	1408	5	5	NaN	NaN	NaN	NaN	NaN	NaN	0.04	0.0147196	0.0125	0.005625	0.29191	0.0195955	NaN	NaN	2.335	0.12175	NaN	NaN	0.0751985	0.00375992	0.165278	0.0153158	NaN	NaN	NaN	NaN	NaN	NaN	NaN	NaN	NaN	NaN	NaN	NaN	NaN	NaN	NaN	NaN	0.384445	0.0841237
California Current Ecosystem	1408	5	8	NaN	NaN	NaN	NaN	NaN	NaN	NaN	NaN	NaN	NaN	NaN	NaN	NaN	NaN	NaN	NaN	NaN	NaN	NaN	NaN	NaN	NaN	NaN	NaN	NaN	NaN	NaN	NaN	NaN	NaN	NaN	NaN	NaN	NaN	NaN	NaN	NaN	NaN	0.26703	0.0640016
California Current Ecosystem	1408	5	12	NaN	NaN	NaN	NaN	NaN	NaN	0.02	0.0069282	0.00333333	0.00596595	0.345846	0.0257409	NaN	NaN	2.33	0.140296	NaN	NaN	0.0837794	0.004837	NaN	NaN	NaN	NaN	NaN	NaN	NaN	NaN	NaN	NaN	NaN	NaN	NaN	NaN	NaN	NaN	NaN	NaN	0.231588	0.0446649
California Current Ecosystem	1408	5	20	NaN	NaN	NaN	NaN	NaN	NaN	0.02	0.00534522	0.00142857	0.00383364	0.372527	0.02881	NaN	NaN	2.30714	0.0909814	NaN	NaN	0.0827414	0.00312733	0.169167	0.0155403	NaN	NaN	NaN	NaN	NaN	NaN	NaN	NaN	NaN	NaN	NaN	NaN	NaN	NaN	NaN	NaN	0.123377	0.0351561
California Current Ecosystem	1408	5	25	NaN	NaN	NaN	NaN	NaN	NaN	NaN	NaN	NaN	NaN	NaN	NaN	NaN	NaN	NaN	NaN	NaN	NaN	NaN	NaN	NaN	NaN	NaN	NaN	NaN	NaN	NaN	NaN	NaN	NaN	NaN	NaN	NaN	NaN	NaN	NaN	NaN	NaN	0.116113	0.0274301
California Current Ecosystem	1408	5	30	NaN	NaN	NaN	NaN	NaN	NaN	NaN	NaN	NaN	NaN	NaN	NaN	NaN	NaN	NaN	NaN	NaN	NaN	NaN	NaN	NaN	NaN	NaN	NaN	NaN	NaN	NaN	NaN	NaN	NaN	NaN	NaN	NaN	NaN	NaN	NaN	NaN	NaN	0.106964	0.0226827
California Current Ecosystem	1408	5	35	NaN	NaN	NaN	NaN	NaN	NaN	0.0166667	0.00673575	0	0.0057735	0.415772	0.0691418	NaN	NaN	2.33667	0.140681	NaN	NaN	0.110436	0.00637605	NaN	NaN	NaN	NaN	NaN	NaN	NaN	NaN	NaN	NaN	NaN	NaN	NaN	NaN	NaN	NaN	NaN	NaN	0.0670997	0.0221001
California Current Ecosystem	1408	5	40	NaN	NaN	NaN	NaN	NaN	NaN	0.0275	0.00853913	0.0075	0.005375	0.46673	0.052468	NaN	NaN	2.2925	0.140912	NaN	NaN	0.0982353	0.00491177	0.1325	0.0134234	NaN	NaN	NaN	NaN	NaN	NaN	NaN	NaN	NaN	NaN	NaN	NaN	NaN	NaN	NaN	NaN	0.06643	0.0127524
California Current Ecosystem	1408	5	45	NaN	NaN	NaN	NaN	NaN	NaN	NaN	NaN	NaN	NaN	NaN	NaN	NaN	NaN	NaN	NaN	NaN	NaN	NaN	NaN	NaN	NaN	NaN	NaN	NaN	NaN	NaN	NaN	NaN	NaN	NaN	NaN	NaN	NaN	NaN	NaN	NaN	NaN	0.0527035	0.00927322
California Current Ecosystem	1408	5	50	NaN	NaN	NaN	NaN	NaN	NaN	NaN	NaN	NaN	NaN	NaN	NaN	NaN	NaN	NaN	NaN	NaN	NaN	NaN	NaN	NaN	NaN	NaN	NaN	NaN	NaN	NaN	NaN	NaN	NaN	NaN	NaN	NaN	NaN	NaN	NaN	NaN	NaN	0.0395759	0.00708687
California Current Ecosystem	1408	5	55	NaN	NaN	NaN	NaN	NaN	NaN	0.02	0.0069282	0.00333333	0.00596595	0.351473	0.0442752	NaN	NaN	2.43667	0.146455	NaN	NaN	0.154581	0.00892473	NaN	NaN	NaN	NaN	NaN	NaN	NaN	NaN	NaN	NaN	NaN	NaN	NaN	NaN	NaN	NaN	NaN	NaN	0.0230293	0.00576693
California Current Ecosystem	1408	5	60	NaN	NaN	NaN	NaN	NaN	NaN	0.02	0.006	0	0.005	0.351105	0.049709	NaN	NaN	2.425	0.12625	NaN	NaN	0.158514	0.00792572	0.0972222	0.0113866	NaN	NaN	NaN	NaN	NaN	NaN	NaN	NaN	NaN	NaN	NaN	NaN	NaN	NaN	NaN	NaN	0.0207083	0.00444711
California Current Ecosystem	1408	5	70	NaN	NaN	NaN	NaN	NaN	NaN	0.01	0.011	0	0.01	0.269681	0.0369681	NaN	NaN	2.42	0.252	NaN	NaN	0.207444	0.0207444	NaN	NaN	NaN	NaN	NaN	NaN	NaN	NaN	NaN	NaN	NaN	NaN	NaN	NaN	NaN	NaN	NaN	NaN	0.0114338	0.00257058
California Current Ecosystem	1408	5	80	NaN	NaN	NaN	NaN	NaN	NaN	0.12	0.0336155	0.024	0.0143527	0.389589	0.0218951	NaN	NaN	2.822	0.130676	NaN	NaN	0.261259	0.0201644	0.0761111	0.0101678	NaN	NaN	NaN	NaN	NaN	NaN	NaN	NaN	NaN	NaN	NaN	NaN	NaN	NaN	NaN	NaN	0.00747297	0.00150635
California Current Ecosystem	1408	5	90	NaN	NaN	NaN	NaN	NaN	NaN	2.058	0.528038	0.032	0.012	0.345874	0.0376736	NaN	NaN	3.974	0.182195	NaN	NaN	0.264566	0.0118318	0.0455556	0.00840365	NaN	NaN	NaN	NaN	NaN	NaN	NaN	NaN	NaN	NaN	NaN	NaN	NaN	NaN	NaN	NaN	0.00369878	0.000785682
California Current Ecosystem	1408	5	100	NaN	NaN	NaN	NaN	NaN	NaN	5.016	0.411541	0.004	0.00465102	0.305726	0.0425681	NaN	NaN	5.278	0.240511	NaN	NaN	0.222476	0.0124595	NaN	NaN	NaN	NaN	NaN	NaN	NaN	NaN	NaN	NaN	NaN	NaN	NaN	NaN	NaN	NaN	NaN	NaN	0.00114046	0.000402902
California Current Ecosystem	1408	5	110	NaN	NaN	NaN	NaN	NaN	NaN	8.64	0.62	0.005	0.00742462	0.23011	0.0361958	NaN	NaN	7.445	0.533512	NaN	NaN	0.140175	0.0169112	NaN	NaN	NaN	NaN	NaN	NaN	NaN	NaN	NaN	NaN	NaN	NaN	NaN	NaN	NaN	NaN	NaN	NaN	0.0010805	0.000256096
California Current Ecosystem	1408	5	120	NaN	NaN	NaN	NaN	NaN	NaN	10.8775	0.548875	0.02	0.00816497	0.245686	0.0535286	NaN	NaN	9.325	0.47125	NaN	NaN	0.0885771	0.00791355	NaN	NaN	NaN	NaN	NaN	NaN	NaN	NaN	NaN	NaN	NaN	NaN	NaN	NaN	NaN	NaN	NaN	NaN	0.000594682	0.000160377
California Current Ecosystem	1604	1	2	NaN	NaN	NaN	NaN	NaN	NaN	NaN	NaN	NaN	NaN	NaN	NaN	NaN	NaN	NaN	NaN	NaN	NaN	NaN	NaN	NaN	NaN	NaN	NaN	NaN	NaN	NaN	NaN	NaN	NaN	NaN	NaN	NaN	NaN	NaN	NaN	NaN	NaN	NaN	NaN
California Current Ecosystem	1604	1	5	NaN	NaN	NaN	NaN	NaN	NaN	0.025	0.025	0.01	0.01	0.721242	0.327346	NaN	NaN	0.955	0.625	NaN	NaN	0.0746007	0.00430707	0.2	0.03	0.94	0.2094	0.85	0.2085	NaN	NaN	NaN	NaN	NaN	NaN	NaN	NaN	0.013519	0.0023519	NaN	NaN	0.218205	0.0771541
California Current Ecosystem	1604	1	8	NaN	NaN	NaN	NaN	NaN	NaN	NaN	NaN	NaN	NaN	NaN	NaN	NaN	NaN	NaN	NaN	NaN	NaN	NaN	NaN	NaN	NaN	NaN	NaN	NaN	NaN	NaN	NaN	NaN	NaN	NaN	NaN	NaN	NaN	NaN	NaN	NaN	NaN	0.134243	0.0335657
California Current Ecosystem	1604	1	12	NaN	NaN	NaN	NaN	NaN	NaN	NaN	NaN	NaN	NaN	NaN	NaN	NaN	NaN	NaN	NaN	NaN	NaN	NaN	NaN	NaN	NaN	NaN	NaN	NaN	NaN	NaN	NaN	NaN	NaN	NaN	NaN	NaN	NaN	NaN	NaN	NaN	NaN	0.121722	0.0304355
California Current Ecosystem	1604	1	20	NaN	NaN	NaN	NaN	NaN	NaN	0.025	0.015	0	0.00707107	0.337382	0.0309276	NaN	NaN	1.035	0.585	NaN	NaN	0.0749628	0.00570369	0.15	0.025	0.64	0.2064	0.52	0.2052	NaN	NaN	NaN	NaN	NaN	NaN	NaN	NaN	0.006212	0.0016212	NaN	NaN	0.126655	0.0316687
California Current Ecosystem	1604	1	25	NaN	NaN	NaN	NaN	NaN	NaN	NaN	NaN	NaN	NaN	NaN	NaN	NaN	NaN	NaN	NaN	NaN	NaN	NaN	NaN	NaN	NaN	NaN	NaN	NaN	NaN	NaN	NaN	NaN	NaN	NaN	NaN	NaN	NaN	NaN	NaN	NaN	NaN	0.114993	0.0287532
California Current Ecosystem	1604	1	30	NaN	NaN	NaN	NaN	NaN	NaN	NaN	NaN	NaN	NaN	NaN	NaN	NaN	NaN	NaN	NaN	NaN	NaN	NaN	NaN	NaN	NaN	NaN	NaN	NaN	NaN	NaN	NaN	NaN	NaN	NaN	NaN	NaN	NaN	NaN	NaN	NaN	NaN	0.108717	0.0271844
California Current Ecosystem	1604	1	35	NaN	NaN	NaN	NaN	NaN	NaN	0.0233333	0.0120185	0	0.00707107	0.376347	0.0284415	10.4494	1.05494	1.60667	0.665566	NaN	NaN	0.104115	0.0113797	0.158333	0.0258333	0.22	0.2022	0.1	0.201	NaN	NaN	NaN	NaN	NaN	NaN	NaN	NaN	0.023899	0.0033899	NaN	NaN	0.0981079	0.024532
California Current Ecosystem	1604	1	40	NaN	NaN	NaN	NaN	NaN	NaN	NaN	NaN	NaN	NaN	NaN	NaN	NaN	NaN	NaN	NaN	NaN	NaN	NaN	NaN	NaN	NaN	NaN	NaN	NaN	NaN	NaN	NaN	NaN	NaN	NaN	NaN	NaN	NaN	NaN	NaN	NaN	NaN	0.0805767	0.0201492
California Current Ecosystem	1604	1	45	NaN	NaN	NaN	NaN	NaN	NaN	NaN	NaN	NaN	NaN	NaN	NaN	NaN	NaN	NaN	NaN	NaN	NaN	NaN	NaN	NaN	NaN	NaN	NaN	NaN	NaN	NaN	NaN	NaN	NaN	NaN	NaN	NaN	NaN	NaN	NaN	NaN	NaN	0.0657969	0.0164542
California Current Ecosystem	1604	1	50	NaN	NaN	NaN	NaN	NaN	NaN	0	0.00707107	0.055	0.055	0.73684	0.0591736	NaN	NaN	1.265	0.535	NaN	NaN	0.217691	0.026753	0.225	0.0325	NaN	NaN	NaN	NaN	NaN	NaN	NaN	NaN	NaN	NaN	NaN	NaN	0	0.001	NaN	NaN	0.052932	0.013238
California Current Ecosystem	1604	1	55	NaN	NaN	NaN	NaN	NaN	NaN	NaN	NaN	NaN	NaN	NaN	NaN	NaN	NaN	NaN	NaN	NaN	NaN	NaN	NaN	NaN	NaN	NaN	NaN	NaN	NaN	NaN	NaN	NaN	NaN	NaN	NaN	NaN	NaN	NaN	NaN	NaN	NaN	0.0417194	0.0104348
California Current Ecosystem	1604	1	60	NaN	NaN	NaN	NaN	NaN	NaN	NaN	NaN	NaN	NaN	NaN	NaN	NaN	NaN	NaN	NaN	NaN	NaN	NaN	NaN	NaN	NaN	NaN	NaN	NaN	NaN	NaN	NaN	NaN	NaN	NaN	NaN	NaN	NaN	NaN	NaN	NaN	NaN	0.0318425	0.00820845
California Current Ecosystem	1604	1	70	NaN	NaN	NaN	NaN	NaN	NaN	0.82	0.38	0.03	0.03	0.876922	0.0690788	NaN	NaN	2.44	0.6	NaN	NaN	0.805307	0.0569438	0.433333	0.0533333	0.2	0.202	0.05	0.2005	NaN	NaN	NaN	NaN	NaN	NaN	NaN	NaN	0.040385	0.0050385	NaN	NaN	0.0161812	0.00458952
California Current Ecosystem	1604	1	80	NaN	NaN	NaN	NaN	NaN	NaN	3.325	0.995	0.02	0.01	0.516864	0.107025	NaN	NaN	3.8	0.43	NaN	NaN	0.517406	0.0365862	0.15	0.025	0.09	0.2009	-0.03	0.1997	NaN	NaN	NaN	NaN	NaN	NaN	NaN	NaN	0.016587	0.0026587	NaN	NaN	0.00655095	0.00211758
California Current Ecosystem	1604	1	90	NaN	NaN	NaN	NaN	NaN	NaN	4.34	0.444	0	0.01	0.393305	0.0493305	9.11643	0.921643	3.56	0.366	NaN	NaN	0.532345	0.0532345	NaN	NaN	NaN	NaN	NaN	NaN	NaN	NaN	NaN	NaN	NaN	NaN	NaN	NaN	NaN	NaN	NaN	NaN	0.00282809	0.000906863
California Current Ecosystem	1604	1	100	NaN	NaN	NaN	NaN	NaN	NaN	10.04	2.16	0.01	0.01	0.409592	0.0360336	NaN	NaN	8.485	0.845	NaN	NaN	0.170024	0.0893578	NaN	NaN	NaN	NaN	NaN	NaN	NaN	NaN	NaN	NaN	NaN	NaN	NaN	NaN	NaN	NaN	NaN	NaN	0.00144008	0.000469618
California Current Ecosystem	1604	1	110	NaN	NaN	NaN	NaN	NaN	NaN	13.41	1.351	0	0.01	0.277676	0.0377676	NaN	NaN	9.97	1.007	NaN	NaN	0.136889	0.0136889	NaN	NaN	NaN	NaN	NaN	NaN	NaN	NaN	NaN	NaN	NaN	NaN	NaN	NaN	NaN	NaN	NaN	NaN	0.000799474	0.000264821
California Current Ecosystem	1604	2	2	NaN	NaN	NaN	NaN	NaN	NaN	NaN	NaN	NaN	NaN	NaN	NaN	NaN	NaN	NaN	NaN	NaN	NaN	NaN	NaN	NaN	NaN	NaN	NaN	NaN	NaN	NaN	NaN	NaN	NaN	NaN	NaN	NaN	NaN	NaN	NaN	NaN	NaN	0.752307	0.215975
California Current Ecosystem	1604	2	5	0.157441	0.0213043	0.00163454	0.00145926	0.0406049	0.0136925	0.07	0.0376386	0.0025	0.005125	0.37403	0.0237015	NaN	NaN	1.97	0.1035	NaN	NaN	0.126568	0.00826648	0.405556	0.151408	0.396667	0.135688	0.44	0.11801	NaN	NaN	NaN	NaN	NaN	NaN	NaN	NaN	0.0316373	0.0170781	NaN	NaN	0.506169	0.1067
California Current Ecosystem	1604	2	8	NaN	NaN	NaN	NaN	NaN	NaN	NaN	NaN	NaN	NaN	NaN	NaN	NaN	NaN	NaN	NaN	NaN	NaN	0.134987	0.0134987	NaN	NaN	NaN	NaN	NaN	NaN	NaN	NaN	NaN	NaN	NaN	NaN	NaN	NaN	NaN	NaN	NaN	NaN	0.378675	0.0748438
California Current Ecosystem	1604	2	12	NaN	NaN	NaN	NaN	NaN	NaN	NaN	NaN	NaN	NaN	NaN	NaN	NaN	NaN	NaN	NaN	NaN	NaN	NaN	NaN	NaN	NaN	NaN	NaN	NaN	NaN	NaN	NaN	NaN	NaN	NaN	NaN	NaN	NaN	NaN	NaN	NaN	NaN	0.303892	0.0572045
California Current Ecosystem	1604	2	20	0.14216	0.0152414	0	7.07107e-05	0.0307989	0.00224852	0.13	0.0162635	0.005	0.00742462	0.368885	0.0331552	NaN	NaN	1.87	0.1393	NaN	NaN	0.13879	0.00981392	0.2875	0.0274004	0.2	0.142836	0.275	0.143366	NaN	NaN	NaN	NaN	NaN	NaN	NaN	NaN	0.03049	0.003937	NaN	NaN	0.185001	0.0292544
California Current Ecosystem	1604	2	25	0.159676	0.0160676	0	0.0001	0.0409172	0.00419172	0.015	0.015	0	0.00707107	0.401279	0.0354457	NaN	NaN	1.845	0.137532	NaN	NaN	0.124666	0.0100494	0.241667	0.0341667	0.18	0.2018	0.26	0.2026	NaN	NaN	NaN	NaN	NaN	NaN	NaN	NaN	0.016032	0.0026032	NaN	NaN	0.162808	0.0257453
California Current Ecosystem	1604	2	30	NaN	NaN	NaN	NaN	NaN	NaN	NaN	NaN	NaN	NaN	NaN	NaN	NaN	NaN	NaN	NaN	NaN	NaN	0.148024	0.0104669	NaN	NaN	NaN	NaN	NaN	NaN	NaN	NaN	NaN	NaN	NaN	NaN	NaN	NaN	NaN	NaN	NaN	NaN	0.124958	0.0197608
California Current Ecosystem	1604	2	35	0.146191	0.0147191	0	0.0001	0.00861552	0.000961552	0.08	0.018	0	0.01	0.360906	0.0460906	NaN	NaN	1.91	0.201	NaN	NaN	0.147753	0.0147753	0.216667	0.0316667	0.37	0.2037	0.3	0.203	NaN	NaN	NaN	NaN	NaN	NaN	NaN	NaN	0.027409	0.0037409	NaN	NaN	0.101757	0.0169526
California Current Ecosystem	1604	2	40	0.202008	0.0203008	0	0.0001	0.0281258	0.00291258	0.04	0.014	0	0.01	0.360753	0.0460753	NaN	NaN	1.86	0.196	NaN	NaN	0.13716	0.013716	0.25	0.035	0.35	0.2035	0.4	0.204	NaN	NaN	NaN	NaN	NaN	NaN	NaN	NaN	0.013475	0.0023475	NaN	NaN	0.0824365	0.0130375
California Current Ecosystem	1604	2	45	NaN	NaN	NaN	NaN	NaN	NaN	NaN	NaN	NaN	NaN	NaN	NaN	NaN	NaN	NaN	NaN	NaN	NaN	NaN	NaN	NaN	NaN	NaN	NaN	NaN	NaN	NaN	NaN	NaN	NaN	NaN	NaN	NaN	NaN	NaN	NaN	NaN	NaN	0.0772847	0.0122229
California Current Ecosystem	1604	2	50	0.144945	0.00842614	0	5.7735e-05	0.0680462	0.0549303	0.04	0.0261406	0.005	0.00525	0.397819	0.0287416	NaN	NaN	1.91	0.1005	NaN	NaN	0.152506	0.0151914	0.204167	0.0541667	0.49	0.144886	0.345	0.155	NaN	NaN	NaN	NaN	NaN	NaN	NaN	NaN	0.0232175	0.00234883	NaN	NaN	0.056464	0.00893091
California Current Ecosystem	1604	2	55	NaN	NaN	NaN	NaN	NaN	NaN	NaN	NaN	NaN	NaN	NaN	NaN	NaN	NaN	NaN	NaN	NaN	NaN	NaN	NaN	NaN	NaN	NaN	NaN	NaN	NaN	NaN	NaN	NaN	NaN	NaN	NaN	NaN	NaN	NaN	NaN	NaN	NaN	0.0462708	0.00731922
California Current Ecosystem	1604	2	60	0.140037	0.0141037	0	0.0001	0.0254271	0.00264271	0.03	0.0152753	0.00333333	0.00596595	0.391116	0.0283546	9.71327	0.981327	1.91333	0.11624	NaN	NaN	0.15581	0.00899572	0.166667	0.0266667	0.38	0.2038	0.26	0.2026	NaN	NaN	NaN	NaN	NaN	NaN	NaN	NaN	0.01138	0.002138	NaN	NaN	0.0377613	0.00597374
California Current Ecosystem	1604	2	70	0.149156	0.0174895	0.00290437	0.00145406	0.0431034	0.00945983	0.035	0.0217945	0	0.005	0.429715	0.0741376	9.97401	1.0074	1.96	0.103	NaN	NaN	0.228283	0.0557895	0.204167	0.104167	0.24	0.143118	0.055	0.14181	NaN	NaN	NaN	NaN	NaN	NaN	NaN	NaN	0.0308175	0.0157235	NaN	NaN	0.0217419	0.00344086
California Current Ecosystem	1604	2	80	0.121646	0.0134017	0.000498857	0.000498857	0.037601	0.0130881	0.232	0.229508	0.016	0.0102956	0.569091	0.0438363	9.76344	0.986344	2.124	0.166691	NaN	NaN	0.403821	0.0598565	0.295833	0.0875	0.15	0.2015	0.34	0.2034	NaN	NaN	NaN	NaN	NaN	NaN	NaN	NaN	0.0296635	0.0281985	NaN	NaN	0.0135444	0.00225122
California Current Ecosystem	1604	2	90	0.13164	0.0256934	0	5.7735e-05	0.0810893	0.0417664	0.072	0.0437493	0.004	0.00465102	0.649957	0.0561469	9.5066	0.679289	2.106	0.0986553	NaN	NaN	0.525283	0.0340493	0.191667	0.0666667	0.09	0.2009	0.07	0.2007	NaN	NaN	NaN	NaN	NaN	NaN	NaN	NaN	0.004153	0.003354	NaN	NaN	0.00938575	0.00235745
California Current Ecosystem	1604	2	100	0.0593829	0.00603829	0.000944763	0.000194476	0.0111771	0.00121771	4.73667	1.93744	0.0133333	0.00881917	0.346842	0.0698427	NaN	NaN	5.3	1.28582	NaN	NaN	0.297352	0.0556624	0.0583333	0.0158333	NaN	NaN	NaN	NaN	NaN	NaN	NaN	NaN	NaN	NaN	NaN	NaN	0.008805	0.0018805	NaN	NaN	0.00318923	0.00079012
California Current Ecosystem	1604	2	110	NaN	NaN	NaN	NaN	NaN	NaN	10.47	1.057	0.07	0.017	NaN	NaN	NaN	NaN	9.55	0.965	NaN	NaN	0.255308	0.0255308	NaN	NaN	NaN	NaN	NaN	NaN	NaN	NaN	NaN	NaN	NaN	NaN	NaN	NaN	NaN	NaN	NaN	NaN	0.0011055	0.00032017
California Current Ecosystem	1604	2	120	NaN	NaN	NaN	NaN	NaN	NaN	10.124	2.92597	0.238	0.128662	0.24224	0.0153055	8.51235	0.861235	7.726	1.8325	NaN	NaN	0.127165	0.0161424	NaN	NaN	NaN	NaN	NaN	NaN	NaN	NaN	NaN	NaN	NaN	NaN	NaN	NaN	NaN	NaN	NaN	NaN	0.000538997	0.000174568
California Current Ecosystem	1604	2	130	NaN	NaN	NaN	NaN	NaN	NaN	19.16	1.926	0.17	0.027	0.151419	0.0251419	NaN	NaN	11.94	1.204	NaN	NaN	0.0738764	0.00738764	NaN	NaN	NaN	NaN	NaN	NaN	NaN	NaN	NaN	NaN	NaN	NaN	NaN	NaN	NaN	NaN	NaN	NaN	0.000352107	0.000103737
California Current Ecosystem	1604	3	2	0.197034	0.0198034	0.00216283	0.000316283	0.0537745	0.00547745	4.44	0.454	0.16	0.026	1.26784	0.136784	NaN	NaN	6.01	0.611	NaN	NaN	0.888146	0.0888146	2.96667	0.306667	0.67	0.2067	0.33	0.2033	NaN	NaN	NaN	NaN	NaN	NaN	NaN	NaN	0.1311	0.01411	NaN	NaN	0.743232	0.123875
California Current Ecosystem	1604	3	5	0.239602	0.029161	0.00267747	0.00115108	0.056291	0.00973889	3.2	0.236678	0.0875	0.0143614	2.14226	0.891538	NaN	NaN	6.245	0.31725	NaN	NaN	1.02884	0.046011	3.72917	0.579167	0.585	0.145558	0.285	0.143437	NaN	NaN	NaN	NaN	NaN	NaN	NaN	NaN	0.252277	0.0883715	NaN	NaN	0.434279	0.0580356
California Current Ecosystem	1604	3	8	NaN	NaN	NaN	NaN	NaN	NaN	NaN	NaN	NaN	NaN	NaN	NaN	NaN	NaN	NaN	NaN	NaN	NaN	NaN	NaN	NaN	NaN	NaN	NaN	NaN	NaN	NaN	NaN	NaN	NaN	NaN	NaN	NaN	NaN	NaN	NaN	NaN	NaN	0.3027	0.0404527
California Current Ecosystem	1604	3	12	0.161664	0.012874	0.00213468	0.000932498	0.0721879	0.0109157	4.67667	0.584424	0.101667	0.0186934	2.30417	0.919888	8.95189	0.905189	7.04833	0.308873	NaN	NaN	1.06514	0.064941	2.69722	0.534922	0.495	0.144922	0.23	0.143048	NaN	NaN	NaN	NaN	NaN	NaN	NaN	NaN	0.245293	0.085501	NaN	NaN	0.190536	0.0254641
California Current Ecosystem	1604	3	20	0.22759	0.0253331	0.0017511	0.00081303	0.0565869	0.0209897	4.05	0.544457	0.05	0.011547	1.38321	0.169808	NaN	NaN	6.92	0.4053	NaN	NaN	1.20049	0.118166	2.1875	0.454167	0.395	0.144214	0.18	0.142694	NaN	NaN	NaN	NaN	NaN	NaN	NaN	NaN	0.238608	0.102607	NaN	NaN	0.0777447	0.0103918
California Current Ecosystem	1604	3	25	0.235799	0.0167442	0.00145931	0.000992347	0.0507827	0.0170029	5.9775	0.794904	0.1	0.0248328	1.73464	0.571126	8.92827	0.638395	7.8825	0.399125	NaN	NaN	1.08424	0.0751093	1.00417	0.3625	0.35	0.143896	0.225	0.143012	NaN	NaN	NaN	NaN	NaN	NaN	NaN	NaN	0.0403365	0.0244975	NaN	NaN	0.0478922	0.00640254
California Current Ecosystem	1604	3	30	0.187801	0.0814489	0.000666454	0.00033332	0.0593791	0.0113902	5.7275	0.617406	0.1175	0.0319831	3.29634	1.41356	NaN	NaN	7.67	0.490187	NaN	NaN	1.05518	0.102231	0.65	0.1	0.215	0.215	0.195	0.165	NaN	NaN	NaN	NaN	NaN	NaN	NaN	NaN	0.0269675	0.0073625	NaN	NaN	0.0281688	0.00376689
California Current Ecosystem	1604	3	35	0.101632	0.0231527	0.00255343	0.000484414	0.183212	0.0318701	7.225	0.565	0.19	0.08	1.41681	0.508645	NaN	NaN	8.74	0.625082	NaN	NaN	0.942467	0.176543	0.225	0.0325	0.11	0.2011	0.2	0.202	NaN	NaN	NaN	NaN	NaN	NaN	NaN	NaN	0.007902	0.0017902	NaN	NaN	0.0174575	0.00233553
California Current Ecosystem	1604	3	40	0.103116	0.0270637	0.00216167	0.00132211	0.0883887	0.0598928	8.742	1.2463	0.462	0.119808	0.913801	0.277355	NaN	NaN	8.488	0.43641	NaN	NaN	0.461673	0.103538	0.15	0.0416667	NaN	NaN	NaN	NaN	NaN	NaN	NaN	NaN	NaN	NaN	NaN	NaN	0.010295	0.001682	NaN	NaN	0.0116728	0.00156252
California Current Ecosystem	1604	3	45	NaN	NaN	NaN	NaN	NaN	NaN	10.1	1.02	0.78	0.088	0.622598	0.0722598	NaN	NaN	10.27	1.037	NaN	NaN	0.269703	0.0269703	NaN	NaN	NaN	NaN	NaN	NaN	NaN	NaN	NaN	NaN	NaN	NaN	NaN	NaN	NaN	NaN	NaN	NaN	0.00798588	0.00106983
California Current Ecosystem	1604	3	50	0.0477694	0.00487694	0.000643192	0.000164319	0.0643675	0.00653675	11.355	2.105	0.4	0.14	5.87935	5.58138	7.88179	0.798179	11.255	1.745	NaN	NaN	0.290798	0.0689271	0.0416667	0.0141667	0.56	0.2056	0.1	0.201	NaN	NaN	NaN	NaN	NaN	NaN	NaN	NaN	0.006289	0.0016289	NaN	NaN	0.00565919	0.000758914
California Current Ecosystem	1604	3	55	NaN	NaN	NaN	NaN	NaN	NaN	12.01	1.211	0.44	0.054	0.985813	0.108581	NaN	NaN	11.88	1.198	NaN	NaN	0.246074	0.0246074	NaN	NaN	NaN	NaN	NaN	NaN	NaN	NaN	NaN	NaN	NaN	NaN	NaN	NaN	NaN	NaN	NaN	NaN	0.00406569	0.000545973
California Current Ecosystem	1604	3	60	0.11036	0.011136	0.00319578	0.000419578	0.0332222	0.00342222	13.445	1.05139	0.265	0.105	0.492171	0.10337	8.32978	0.842978	13.2625	0.973459	NaN	NaN	0.264067	0.0973466	0.025	0.0125	-0.07	0.1993	-0.02	0.1998	NaN	NaN	NaN	NaN	NaN	NaN	NaN	NaN	0.003774	0.0013774	NaN	NaN	0.00301503	0.000405573
California Current Ecosystem	1604	4	2	0.652651	0.0504723	0.49835	0.129928	0.371285	0.0792275	1.205	0.234858	0.49	0.0482355	6.3797	0.412546	10.8492	1.09492	6.00667	0.392842	NaN	NaN	4.10983	0.329391	16.6667	1.44952	NaN	NaN	NaN	NaN	NaN	NaN	NaN	NaN	NaN	NaN	NaN	NaN	0.513243	0.191262	NaN	NaN	0.465406	0.1323
California Current Ecosystem	1604	4	5	0.547823	0.167507	0.486362	0.240486	0.342933	0.119015	1.05857	0.195685	0.435714	0.068725	6.78707	0.634633	9.91189	0.707947	5.67714	0.230917	NaN	NaN	4.27234	0.357924	13.0028	1.84054	NaN	NaN	NaN	NaN	NaN	NaN	NaN	NaN	NaN	NaN	NaN	NaN	0.321002	0.162003	NaN	NaN	0.236133	0.0479311
California Current Ecosystem	1604	4	8	NaN	NaN	NaN	NaN	NaN	NaN	NaN	NaN	NaN	NaN	NaN	NaN	NaN	NaN	NaN	NaN	NaN	NaN	NaN	NaN	NaN	NaN	NaN	NaN	NaN	NaN	NaN	NaN	NaN	NaN	NaN	NaN	NaN	NaN	NaN	NaN	NaN	NaN	0.101093	0.0207975
California Current Ecosystem	1604	4	12	0.366456	0.0504492	0.289669	0.0396469	0.313784	0.0931113	4.02571	1.07925	0.917143	0.166872	5.5808	0.694102	9.88537	0.888499	7.36143	0.628276	NaN	NaN	3.80518	0.207501	1.78611	0.477802	NaN	NaN	NaN	NaN	NaN	NaN	NaN	NaN	NaN	NaN	NaN	NaN	0.0147643	0.00142977	NaN	NaN	0.0333928	0.0066384
California Current Ecosystem	1604	4	20	0.31023	0.0706254	0.0915395	0.0258847	0.166067	0.0479336	6.78	1.29817	1.12429	0.0489342	3.41182	0.265614	9.20754	0.658142	9.81857	1.02594	NaN	NaN	2.88599	0.283124	0.183333	0.0163583	NaN	NaN	NaN	NaN	NaN	NaN	NaN	NaN	NaN	NaN	NaN	NaN	0.0109453	0.00331227	NaN	NaN	0.00491189	0.00080036
California Current Ecosystem	1604	4	25	0.25244	0.108649	0.060971	0.0122934	0.0841398	0.0292182	8.694	1.48368	1.254	0.119691	14.841	11.5626	NaN	NaN	11.382	1.27035	NaN	NaN	2.05288	0.263566	0.0416667	0.00833333	NaN	NaN	NaN	NaN	NaN	NaN	NaN	NaN	NaN	NaN	NaN	NaN	0.006918	0.001887	NaN	NaN	0.00190196	0.000310148
Costa Rica Dome	2010.06	1	2	NaN	NaN	NaN	NaN	NaN	NaN	0.0605352	0.0307686	NaN	NaN	2.07127	0.159944	NaN	NaN	0.804663	0.0452332	0.238925	0.028552	0.19732	0.028743	NaN	NaN	0.299669	0.358505	-0.106899	0.366917	NaN	NaN	NaN	NaN	NaN	NaN	NaN	NaN	0.037152	0.0280225	NaN	NaN	NaN	NaN
Costa Rica Dome	2010.06	1	5	NaN	NaN	NaN	NaN	NaN	NaN	NaN	NaN	NaN	NaN	NaN	NaN	NaN	NaN	NaN	NaN	NaN	NaN	NaN	NaN	NaN	NaN	NaN	NaN	NaN	NaN	NaN	NaN	NaN	NaN	NaN	NaN	NaN	NaN	NaN	NaN	NaN	NaN	NaN	NaN
Costa Rica Dome	2010.06	1	8	NaN	NaN	NaN	NaN	NaN	NaN	NaN	NaN	NaN	NaN	NaN	NaN	NaN	NaN	NaN	NaN	NaN	NaN	NaN	NaN	NaN	NaN	NaN	NaN	NaN	NaN	NaN	NaN	NaN	NaN	NaN	NaN	NaN	NaN	NaN	NaN	NaN	NaN	NaN	NaN
Costa Rica Dome	2010.06	1	12	NaN	NaN	NaN	NaN	NaN	NaN	0.0827914	0.017648	NaN	NaN	2.34402	0.172818	NaN	NaN	0.817538	0.0475552	0.2381	0.0234534	0.208401	0.01042	NaN	NaN	0.515944	0.118449	0.333792	0.231867	NaN	NaN	NaN	NaN	NaN	NaN	NaN	NaN	0.0180624	0.00905724	NaN	NaN	NaN	NaN
Costa Rica Dome	2010.06	1	20	NaN	NaN	NaN	NaN	NaN	NaN	0.116982	0.0491134	NaN	NaN	2.44943	0.252572	NaN	NaN	1.41395	0.218678	0.368475	0.0809286	0.425858	0.0521551	NaN	NaN	0.018189	0.428466	0.193054	0.391857	NaN	NaN	NaN	NaN	NaN	NaN	NaN	NaN	0.0441602	0.0281802	NaN	NaN	NaN	NaN
Costa Rica Dome	2010.06	1	25	NaN	NaN	NaN	NaN	NaN	NaN	0.0361272	0.0136127	NaN	NaN	NaN	NaN	NaN	NaN	1.88952	0.198952	NaN	NaN	NaN	NaN	NaN	NaN	NaN	NaN	NaN	NaN	NaN	NaN	NaN	NaN	NaN	NaN	NaN	NaN	NaN	NaN	NaN	NaN	NaN	NaN
Costa Rica Dome	2010.06	1	30	NaN	NaN	NaN	NaN	NaN	NaN	4.04046	3.3911	NaN	NaN	3.19692	0.233128	NaN	NaN	4.72032	1.26889	0.33905	0.0617541	0.426284	0.0246953	NaN	NaN	-0.115248	0.140606	0.128709	0.142331	NaN	NaN	NaN	NaN	NaN	NaN	NaN	NaN	0.0837807	0.0235531	NaN	NaN	NaN	NaN
Costa Rica Dome	2010.06	1	35	NaN	NaN	NaN	NaN	NaN	NaN	NaN	NaN	NaN	NaN	NaN	NaN	NaN	NaN	NaN	NaN	NaN	NaN	NaN	NaN	NaN	NaN	NaN	NaN	NaN	NaN	NaN	NaN	NaN	NaN	NaN	NaN	NaN	NaN	NaN	NaN	NaN	NaN	NaN	NaN
Costa Rica Dome	2010.06	1	40	NaN	NaN	NaN	NaN	NaN	NaN	21.0718	1.05859	NaN	NaN	1.52908	0.115193	NaN	NaN	12.9088	0.675194	0.18795	0.023362	0.346802	0.0318073	NaN	NaN	0.298574	0.202986	0.767995	0.20768	NaN	NaN	NaN	NaN	NaN	NaN	NaN	NaN	0.0068898	0.00116182	NaN	NaN	NaN	NaN
Costa Rica Dome	2010.06	1	45	NaN	NaN	NaN	NaN	NaN	NaN	NaN	NaN	NaN	NaN	NaN	NaN	NaN	NaN	NaN	NaN	NaN	NaN	NaN	NaN	NaN	NaN	NaN	NaN	NaN	NaN	NaN	NaN	NaN	NaN	NaN	NaN	NaN	NaN	NaN	NaN	NaN	NaN	NaN	NaN
Costa Rica Dome	2010.06	1	50	NaN	NaN	NaN	NaN	NaN	NaN	NaN	NaN	NaN	NaN	NaN	NaN	NaN	NaN	NaN	NaN	NaN	NaN	NaN	NaN	NaN	NaN	NaN	NaN	NaN	NaN	NaN	NaN	NaN	NaN	NaN	NaN	NaN	NaN	NaN	NaN	NaN	NaN	NaN	NaN
Costa Rica Dome	2010.06	1	55	NaN	NaN	NaN	NaN	NaN	NaN	28.2566	1.41783	NaN	NaN	0.79914	0.0670027	NaN	NaN	17.9777	0.903884	0.140525	0.024868	0.183043	0.014937	NaN	NaN	0.182135	0.201821	0.237869	0.202379	NaN	NaN	NaN	NaN	NaN	NaN	NaN	NaN	0.00758181	0.00191993	NaN	NaN	NaN	NaN
Costa Rica Dome	2010.06	1	60	NaN	NaN	NaN	NaN	NaN	NaN	NaN	NaN	NaN	NaN	NaN	NaN	NaN	NaN	NaN	NaN	NaN	NaN	NaN	NaN	NaN	NaN	NaN	NaN	NaN	NaN	NaN	NaN	NaN	NaN	NaN	NaN	NaN	NaN	NaN	NaN	NaN	NaN	NaN	NaN
Costa Rica Dome	2010.06	2	2	0.634034	0.0317517	0.00201258	0.00113788	0.13827	0.0200131	1.5909	0.196008	NaN	NaN	2.39125	0.176158	NaN	NaN	2.7793	0.128766	0.05132	0.0129614	0.253831	0.0191631	5.82234	1.69612	0.723672	0.245537	0.742024	0.254201	0.861694	0.147514	1.05327	0.148869	0.861694	0.147514	1.05327	0.148869	0.246586	0.0282094	NaN	NaN	0.814943	0.203741
Costa Rica Dome	2010.06	2	5	NaN	NaN	NaN	NaN	NaN	NaN	NaN	NaN	NaN	NaN	NaN	NaN	NaN	NaN	NaN	NaN	NaN	NaN	NaN	NaN	NaN	NaN	NaN	NaN	NaN	NaN	NaN	NaN	NaN	NaN	NaN	NaN	NaN	NaN	NaN	NaN	NaN	NaN	NaN	NaN
Costa Rica Dome	2010.06	2	8	NaN	NaN	NaN	NaN	NaN	NaN	NaN	NaN	NaN	NaN	NaN	NaN	NaN	NaN	NaN	NaN	NaN	NaN	NaN	NaN	NaN	NaN	NaN	NaN	NaN	NaN	NaN	NaN	NaN	NaN	NaN	NaN	NaN	NaN	NaN	NaN	NaN	NaN	NaN	NaN
Costa Rica Dome	2010.06	2	12	0.623054	0.0312027	0.00132075	0.000586628	0.138396	0.00983191	3.95382	1.31846	NaN	NaN	3.24206	0.99204	NaN	NaN	4.148	0.708259	0.08074	0.0142932	0.255792	0.0232083	3.64649	0.978571	0.618491	0.103092	0.471553	0.102358	0.638357	0.103192	0.773296	0.103866	0.638357	0.103192	0.773296	0.103866	0.21585	0.0608954	NaN	NaN	0.292979	0.0732498
Costa Rica Dome	2010.06	2	20	0.468001	0.0462414	0.000283019	9.43396e-05	0.109308	0.0125395	15.2151	2.47476	NaN	NaN	2.28367	0.168551	NaN	NaN	10.4488	1.50821	0.11154	0.0148152	0.299603	0.0511534	2.17014	0.578787	0.232817	0.120781	0.28626	0.104128	0.278803	0.127765	0.386885	0.103057	0.278803	0.127765	0.386885	0.103057	0.118399	0.0329518	NaN	NaN	0.129268	0.0323221
Costa Rica Dome	2010.06	2	25	NaN	NaN	NaN	NaN	NaN	NaN	NaN	NaN	NaN	NaN	NaN	NaN	NaN	NaN	NaN	NaN	NaN	NaN	NaN	NaN	NaN	NaN	NaN	NaN	NaN	NaN	NaN	NaN	NaN	NaN	NaN	NaN	NaN	NaN	NaN	NaN	NaN	NaN	NaN	NaN
Costa Rica Dome	2010.06	2	30	0.441224	0.0221112	0.000786164	0.000318113	0.136164	0.0181208	24.6761	1.28084	NaN	NaN	2.16687	0.160292	NaN	NaN	16.0074	1.01414	0.13634	0.0176861	0.366683	0.0310071	1.01273	0.138116	0.144563	0.100723	0.163457	0.100817	0.177592	0.100888	0.220557	0.101103	0.177592	0.100888	0.220557	0.101103	0.0660448	0.00941293	NaN	NaN	0.0464965	0.0116291
Costa Rica Dome	2010.06	2	35	NaN	NaN	NaN	NaN	NaN	NaN	NaN	NaN	NaN	NaN	NaN	NaN	NaN	NaN	NaN	NaN	NaN	NaN	NaN	NaN	NaN	NaN	NaN	NaN	NaN	NaN	NaN	NaN	NaN	NaN	NaN	NaN	NaN	NaN	NaN	NaN	NaN	NaN	NaN	NaN
Costa Rica Dome	2010.06	2	40	0.269871	0.0138149	0.00125786	0.000467839	0.103616	0.0239662	28.9845	1.3007	NaN	NaN	1.54507	0.134641	NaN	NaN	19.2883	0.867072	0.0842	0.00823767	0.30412	0.0237621	0.325425	0.0573946	0.110551	0.100553	0.00692532	0.100035	0.149679	0.100748	0.124499	0.100622	0.149679	0.100748	0.124499	0.100622	0.0430151	0.00265075	NaN	NaN	0.016729	0.00418725
Costa Rica Dome	2010.06	2	45	NaN	NaN	NaN	NaN	NaN	NaN	NaN	NaN	NaN	NaN	NaN	NaN	NaN	NaN	NaN	NaN	NaN	NaN	NaN	NaN	NaN	NaN	NaN	NaN	NaN	NaN	NaN	NaN	NaN	NaN	NaN	NaN	NaN	NaN	NaN	NaN	NaN	NaN	NaN	NaN
Costa Rica Dome	2010.06	2	50	0.24038	0.133773	0.000471698	0.000283019	0.0460692	0.00528486	29.0606	1.3041	NaN	NaN	0.718614	0.0578848	NaN	NaN	19.5801	0.88012	0.05982	0.00714737	0.170897	0.0296762	0.0906421	0.0129781	0.0959651	0.135208	0.0315601	0.100158	0.0384308	0.104851	-0.022989	0.0998851	0.0384308	0.104851	-0.022989	0.0998851	0.0328547	0.00293478	NaN	NaN	0.00602063	0.00151016
Costa Rica Dome	2010.06	2	55	NaN	NaN	NaN	NaN	NaN	NaN	NaN	NaN	NaN	NaN	NaN	NaN	NaN	NaN	NaN	NaN	NaN	NaN	NaN	NaN	NaN	NaN	NaN	NaN	NaN	NaN	NaN	NaN	NaN	NaN	NaN	NaN	NaN	NaN	NaN	NaN	NaN	NaN	NaN	NaN
Costa Rica Dome	2010.06	2	60	0.0783876	0.0107468	0.000345912	7.91387e-05	0.0373899	0.0154626	31.7896	1.42615	NaN	NaN	0.462817	0.0397972	NaN	NaN	22.2205	0.998205	0.05346	0.00686294	0.100834	0.00980079	0.0266277	0.00633138	0.177283	0.134212	0.07138	0.100357	0.0587742	0.110925	0.0240923	0.10012	0.0587742	0.110925	0.0240923	0.10012	0.0367183	0.00269728	NaN	NaN	0.00216738	0.000546846
Costa Rica Dome	2010.06	3	2	0.300764	0.0211003	0.00235849	0.000810931	0.111384	0.0155476	0.575805	0.0768351	NaN	NaN	2.19619	0.162365	NaN	NaN	2.32175	0.527104	0.17358	0.0249618	0.233204	0.0369598	3.83816	0.30561	1.13667	0.141204	0.544382	0.12986	0.799748	0.103999	0.509071	0.122746	0.799748	0.103999	0.509071	0.122746	0.104952	0.023192	NaN	NaN	0.834637	0.208664
Costa Rica Dome	2010.06	3	5	NaN	NaN	NaN	NaN	NaN	NaN	NaN	NaN	NaN	NaN	NaN	NaN	NaN	NaN	NaN	NaN	NaN	NaN	NaN	NaN	NaN	NaN	NaN	NaN	NaN	NaN	NaN	NaN	NaN	NaN	NaN	NaN	NaN	NaN	NaN	NaN	NaN	NaN	NaN	NaN
Costa Rica Dome	2010.06	3	8	NaN	NaN	NaN	NaN	NaN	NaN	NaN	NaN	NaN	NaN	NaN	NaN	NaN	NaN	NaN	NaN	NaN	NaN	NaN	NaN	NaN	NaN	NaN	NaN	NaN	NaN	NaN	NaN	NaN	NaN	NaN	NaN	NaN	NaN	NaN	NaN	NaN	NaN	NaN	NaN
Costa Rica Dome	2010.06	3	12	0.330505	0.0211137	0.00440252	0.00147497	0.135975	0.0248892	0.985056	0.148871	NaN	NaN	1.95466	0.145286	NaN	NaN	1.98247	0.238703	0.20432	0.0249191	0.225448	0.0274969	3.09833	0.541477	1.00784	0.105039	0.782092	0.17219	0.901462	0.105422	1.01556	0.197703	0.901462	0.105422	1.01556	0.197703	0.055976	0.015134	NaN	NaN	0.338578	0.0846494
Costa Rica Dome	2010.06	3	20	0.254331	0.0267728	0.0134591	0.0111249	0.146792	0.0227879	7.67449	1.97623	NaN	NaN	2.60232	0.191083	NaN	NaN	4.04288	0.664153	0.2657	0.0319489	0.326452	0.058041	2.03082	0.109983	0.778355	0.103892	0.205313	0.101027	0.717379	0.103587	0.30375	0.101519	0.717379	0.103587	0.30375	0.101519	0.041977	0.0146899	NaN	NaN	0.164808	0.0412071
Costa Rica Dome	2010.06	3	25	NaN	NaN	NaN	NaN	NaN	NaN	NaN	NaN	NaN	NaN	NaN	NaN	NaN	NaN	NaN	NaN	NaN	NaN	NaN	NaN	NaN	NaN	NaN	NaN	NaN	NaN	NaN	NaN	NaN	NaN	NaN	NaN	NaN	NaN	NaN	NaN	NaN	NaN	NaN	NaN
Costa Rica Dome	2010.06	3	30	0.196136	0.0321025	0.00257862	0.000364924	0.072956	0.00431112	25.5425	1.14677	NaN	NaN	1.30953	0.099669	NaN	NaN	13.3512	0.672269	0.14902	0.0222455	0.333186	0.0525561	0.53645	0.125471	0.252321	0.208115	0.0985528	0.150104	0.55746	0.132595	0.325417	0.164589	0.55746	0.132595	0.325417	0.164589	0.0536941	0.0164445	NaN	NaN	0.0671573	0.0167943
Costa Rica Dome	2010.06	3	35	NaN	NaN	NaN	NaN	NaN	NaN	NaN	NaN	NaN	NaN	NaN	NaN	NaN	NaN	NaN	NaN	NaN	NaN	NaN	NaN	NaN	NaN	NaN	NaN	NaN	NaN	NaN	NaN	NaN	NaN	NaN	NaN	NaN	NaN	NaN	NaN	NaN	NaN	NaN	NaN
Costa Rica Dome	2010.06	3	40	NaN	NaN	NaN	NaN	NaN	NaN	NaN	NaN	NaN	NaN	NaN	NaN	NaN	NaN	NaN	NaN	NaN	NaN	NaN	NaN	NaN	NaN	NaN	NaN	NaN	NaN	NaN	NaN	NaN	NaN	NaN	NaN	NaN	NaN	NaN	NaN	NaN	NaN	NaN	NaN
Costa Rica Dome	2010.06	3	45	0.0990304	0.00500152	0.00201258	0.000635189	0.0620755	0.00753414	29.5473	1.32587	NaN	NaN	0.98051	0.204807	NaN	NaN	18.7341	0.842286	0.05644	0.00699621	0.212322	0.0256747	0.175968	0.0615798	0.24785	0.240692	0.260756	0.312672	0.36113	0.122162	0.285719	0.172578	0.36113	0.122162	0.285719	0.172578	0.0473288	0.00286644	NaN	NaN	0.0175468	0.0043917
Costa Rica Dome	2010.06	3	50	NaN	NaN	NaN	NaN	NaN	NaN	NaN	NaN	NaN	NaN	NaN	NaN	NaN	NaN	NaN	NaN	NaN	NaN	NaN	NaN	NaN	NaN	NaN	NaN	NaN	NaN	NaN	NaN	NaN	NaN	NaN	NaN	NaN	NaN	NaN	NaN	NaN	NaN	NaN	NaN
Costa Rica Dome	2010.06	3	55	NaN	NaN	NaN	NaN	NaN	NaN	NaN	NaN	NaN	NaN	NaN	NaN	NaN	NaN	NaN	NaN	NaN	NaN	NaN	NaN	NaN	NaN	NaN	NaN	NaN	NaN	NaN	NaN	NaN	NaN	NaN	NaN	NaN	NaN	NaN	NaN	NaN	NaN	NaN	NaN
Costa Rica Dome	2010.06	3	60	0.0536355	0.00273178	0.000440252	0.000166399	0.0519182	0.0093643	31.0199	1.39172	NaN	NaN	0.464276	0.0524464	NaN	NaN	21.8105	0.979868	0.05624	0.00698727	0.09589	0.00791819	0.0340823	0.00973766	-0.0382894	0.251642	-0.0452485	0.499258	-0.0702167	0.256424	-0.0895151	0.295101	-0.0702167	0.256424	-0.0895151	0.295101	0.0417445	0.00267166	NaN	NaN	0.00460798	0.00115699
Costa Rica Dome	2010.06	3	70	NaN	NaN	NaN	NaN	NaN	NaN	NaN	NaN	NaN	NaN	NaN	NaN	NaN	NaN	NaN	NaN	NaN	NaN	NaN	NaN	NaN	NaN	NaN	NaN	NaN	NaN	NaN	NaN	NaN	NaN	NaN	NaN	NaN	NaN	NaN	NaN	NaN	NaN	NaN	NaN
Costa Rica Dome	2010.06	4	2	0.252786	0.0454295	0.0090566	0.00460796	0.0921069	0.0142166	1.49374	0.226657	NaN	NaN	1.85229	0.237527	NaN	NaN	2.70798	0.14814	0.07868	0.0249994	0.261503	0.0698917	2.15245	0.607237	0.944996	0.215912	0.441738	0.11802	1.03461	0.121443	0.590054	0.118877	1.03461	0.121443	0.590054	0.118877	0.208644	0.141964	NaN	NaN	0.835473	0.208873
Costa Rica Dome	2010.06	4	5	NaN	NaN	NaN	NaN	NaN	NaN	NaN	NaN	NaN	NaN	NaN	NaN	NaN	NaN	NaN	NaN	NaN	NaN	NaN	NaN	NaN	NaN	NaN	NaN	NaN	NaN	NaN	NaN	NaN	NaN	NaN	NaN	NaN	NaN	NaN	NaN	NaN	NaN	NaN	NaN
Costa Rica Dome	2010.06	4	8	NaN	NaN	NaN	NaN	NaN	NaN	NaN	NaN	NaN	NaN	NaN	NaN	NaN	NaN	NaN	NaN	NaN	NaN	NaN	NaN	NaN	NaN	NaN	NaN	NaN	NaN	NaN	NaN	NaN	NaN	NaN	NaN	NaN	NaN	NaN	NaN	NaN	NaN	NaN	NaN
Costa Rica Dome	2010.06	4	12	0.256536	0.0571728	0.00528302	0.00173612	0.0924214	0.00603804	2.31484	0.590809	NaN	NaN	1.82475	0.245273	NaN	NaN	3.08219	0.311716	0.08108	0.0242296	0.248803	0.0565927	1.8199	0.44419	0.932242	0.104661	0.484816	0.102424	0.883229	0.104416	0.60891	0.103045	0.883229	0.104416	0.60891	0.103045	0.072857	0.0178783	NaN	NaN	0.342032	0.085513
Costa Rica Dome	2010.06	4	20	0.180761	0.0158018	0.00537736	0.00235849	0.12956	0.0437319	11.678	2.94133	NaN	NaN	1.57535	0.118465	NaN	NaN	7.10152	1.47012	0.16022	0.0254482	0.242239	0.0574406	1.33886	0.324071	0.592127	0.102961	0.0142317	0.100071	0.443808	0.102219	0.0319715	0.10016	0.443808	0.102219	0.0319715	0.10016	0.0433613	0.0107042	NaN	NaN	0.168541	0.0421402
Costa Rica Dome	2010.06	4	25	NaN	NaN	NaN	NaN	NaN	NaN	NaN	NaN	NaN	NaN	NaN	NaN	NaN	NaN	NaN	NaN	NaN	NaN	NaN	NaN	NaN	NaN	NaN	NaN	NaN	NaN	NaN	NaN	NaN	NaN	NaN	NaN	NaN	NaN	NaN	NaN	NaN	NaN	NaN	NaN
Costa Rica Dome	2010.06	4	30	0.263416	0.0621814	0.00138365	0.000645484	0.0810901	0.0214465	23.8665	1.76453	NaN	NaN	2.02358	0.15016	NaN	NaN	15.3348	1.1332	0.12238	0.0241932	0.273734	0.0453693	0.700331	0.18278	0.311458	0.113605	0.0902979	0.100451	0.266068	0.10133	0.232363	0.101162	0.266068	0.10133	0.232363	0.101162	0.0734654	0.0206449	NaN	NaN	0.0701558	0.017544
Costa Rica Dome	2010.06	4	35	NaN	NaN	NaN	NaN	NaN	NaN	NaN	NaN	NaN	NaN	NaN	NaN	NaN	NaN	NaN	NaN	NaN	NaN	NaN	NaN	NaN	NaN	NaN	NaN	NaN	NaN	NaN	NaN	NaN	NaN	NaN	NaN	NaN	NaN	NaN	NaN	NaN	NaN	NaN	NaN
Costa Rica Dome	2010.06	4	40	0.265852	0.0552934	0.00220126	0.00121684	0.120094	0.0183092	29.2637	1.31319	NaN	NaN	1.44688	0.328142	NaN	NaN	19.1833	0.885052	0.11308	0.0154982	0.274629	0.0519662	0.716117	0.0836759	0.323111	0.117336	0.0560072	0.115793	0.461917	0.118137	0.566229	0.295296	0.461917	0.118137	0.566229	0.295296	0.0700024	0.00821122	NaN	NaN	0.0294581	0.00736954
Costa Rica Dome	2010.06	4	45	NaN	NaN	NaN	NaN	NaN	NaN	NaN	NaN	NaN	NaN	NaN	NaN	NaN	NaN	NaN	NaN	NaN	NaN	NaN	NaN	NaN	NaN	NaN	NaN	NaN	NaN	NaN	NaN	NaN	NaN	NaN	NaN	NaN	NaN	NaN	NaN	NaN	NaN	NaN	NaN
Costa Rica Dome	2010.06	4	50	0.145872	0.0439734	0.00072327	0.000382133	0.0627044	0.00990834	30.7813	1.38105	NaN	NaN	0.872937	0.24607	NaN	NaN	20.8524	0.93702	0.07562	0.00949481	0.162885	0.0389113	0.177316	0.0286557	0.161335	0.116402	0.035809	0.115677	0.122577	0.116178	0.0985592	0.116039	0.122577	0.116178	0.0985592	0.116039	0.0443691	0.0138305	NaN	NaN	0.0124708	0.00325232
Costa Rica Dome	2010.06	4	55	NaN	NaN	NaN	NaN	NaN	NaN	NaN	NaN	NaN	NaN	NaN	NaN	NaN	NaN	NaN	NaN	NaN	NaN	NaN	NaN	NaN	NaN	NaN	NaN	NaN	NaN	NaN	NaN	NaN	NaN	NaN	NaN	NaN	NaN	NaN	NaN	NaN	NaN	NaN	NaN
Costa Rica Dome	2010.06	4	60	0.04959	0.0039519	0.000597484	0.000273543	0.0446541	0.0114721	31.1781	1.3988	NaN	NaN	0.475419	0.0406883	NaN	NaN	21.9779	0.987352	0.05698	0.00702036	0.107226	0.0271227	0.033497	0.0196851	0.451314	0.383209	0.241539	0.343645	0.709339	0.521947	0.636553	0.484804	0.709339	0.521947	0.636553	0.484804	0.0497212	0.00468749	NaN	NaN	0.00531934	0.00161443
Costa Rica Dome	2010.06	4	70	NaN	NaN	NaN	NaN	NaN	NaN	NaN	NaN	NaN	NaN	NaN	NaN	NaN	NaN	NaN	NaN	NaN	NaN	NaN	NaN	NaN	NaN	NaN	NaN	NaN	NaN	NaN	NaN	NaN	NaN	NaN	NaN	NaN	NaN	NaN	NaN	NaN	NaN	NaN	NaN
Costa Rica Dome	2010.06	5	2	NaN	NaN	NaN	NaN	NaN	NaN	1.72333	0.0868215	NaN	NaN	1.5347	0.13989	NaN	NaN	2.58678	0.12885	0.06764	0.00749709	0.192632	0.0316073	3.72898	0.647888	1.36931	0.180842	0.47346	0.17839	NaN	NaN	NaN	NaN	NaN	NaN	NaN	NaN	0.143436	0.0185192	NaN	NaN	NaN	NaN
Costa Rica Dome	2010.06	5	5	NaN	NaN	NaN	NaN	NaN	NaN	NaN	NaN	NaN	NaN	NaN	NaN	NaN	NaN	NaN	NaN	NaN	NaN	NaN	NaN	NaN	NaN	NaN	NaN	NaN	NaN	NaN	NaN	NaN	NaN	NaN	NaN	NaN	NaN	NaN	NaN	NaN	NaN	NaN	NaN
Costa Rica Dome	2010.06	5	8	NaN	NaN	NaN	NaN	NaN	NaN	NaN	NaN	NaN	NaN	NaN	NaN	NaN	NaN	NaN	NaN	NaN	NaN	NaN	NaN	NaN	NaN	NaN	NaN	NaN	NaN	NaN	NaN	NaN	NaN	NaN	NaN	NaN	NaN	NaN	NaN	NaN	NaN	NaN	NaN
Costa Rica Dome	2010.06	5	12	NaN	NaN	NaN	NaN	NaN	NaN	1.81145	0.0942807	NaN	NaN	1.822	0.438384	NaN	NaN	2.52706	0.20758	0.07456	0.00780656	0.190331	0.0337329	3.11568	0.503479	1.47792	0.10739	0.718864	0.219131	NaN	NaN	NaN	NaN	NaN	NaN	NaN	NaN	0.121286	0.0152041	NaN	NaN	NaN	NaN
Costa Rica Dome	2010.06	5	20	NaN	NaN	NaN	NaN	NaN	NaN	4.67204	2.38614	NaN	NaN	1.68582	0.486977	NaN	NaN	3.54343	0.845786	0.0833	0.0112005	0.207889	0.0376145	2.44943	0.631944	1.33361	0.280812	0.304288	0.268973	NaN	NaN	NaN	NaN	NaN	NaN	NaN	NaN	0.141319	0.0352077	NaN	NaN	NaN	NaN
Costa Rica Dome	2010.06	5	25	NaN	NaN	NaN	NaN	NaN	NaN	20.9005	2.10005	NaN	NaN	1.16653	0.126653	NaN	NaN	10.6696	1.07696	0.0639	0.01639	0.10484	0.010484	0.49786	0.059786	0.921431	0.209214	-0.249954	0.1975	NaN	NaN	NaN	NaN	NaN	NaN	NaN	NaN	0.129324	0.0139324	NaN	NaN	NaN	NaN
Costa Rica Dome	2010.06	5	30	NaN	NaN	NaN	NaN	NaN	NaN	18.8215	0.946074	NaN	NaN	1.16538	0.126538	NaN	NaN	9.91549	0.75374	0.081325	0.00906625	0.214261	0.0530385	0.95006	0.188635	1.3401	0.150897	0.171668	0.265508	NaN	NaN	NaN	NaN	NaN	NaN	NaN	NaN	0.173131	0.0112427	NaN	NaN	NaN	NaN
Costa Rica Dome	2010.06	5	35	NaN	NaN	NaN	NaN	NaN	NaN	NaN	NaN	NaN	NaN	NaN	NaN	NaN	NaN	NaN	NaN	NaN	NaN	NaN	NaN	NaN	NaN	NaN	NaN	NaN	NaN	NaN	NaN	NaN	NaN	NaN	NaN	NaN	NaN	NaN	NaN	NaN	NaN	NaN	NaN
Costa Rica Dome	2010.06	5	40	NaN	NaN	NaN	NaN	NaN	NaN	21.663	0.973273	NaN	NaN	1.23982	0.252877	NaN	NaN	14.7939	0.971127	0.07376	0.0123388	0.228176	0.0390683	0.745452	0.173083	0.828382	0.329594	0.304289	0.117227	NaN	NaN	NaN	NaN	NaN	NaN	NaN	NaN	0.165835	0.0102387	NaN	NaN	NaN	NaN
Costa Rica Dome	2010.06	5	45	NaN	NaN	NaN	NaN	NaN	NaN	NaN	NaN	NaN	NaN	NaN	NaN	NaN	NaN	NaN	NaN	NaN	NaN	NaN	NaN	NaN	NaN	NaN	NaN	NaN	NaN	NaN	NaN	NaN	NaN	NaN	NaN	NaN	NaN	NaN	NaN	NaN	NaN	NaN	NaN
Costa Rica Dome	2010.06	5	50	NaN	NaN	NaN	NaN	NaN	NaN	25.4288	1.22395	NaN	NaN	0.839469	0.105885	NaN	NaN	17.4934	0.786803	0.06532	0.0104469	0.230562	0.0353455	0.343779	0.0462875	0.201045	0.214571	0.00197035	0.39081	NaN	NaN	NaN	NaN	NaN	NaN	NaN	NaN	0.170642	0.0229778	NaN	NaN	NaN	NaN
Costa Rica Dome	2010.06	5	55	NaN	NaN	NaN	NaN	NaN	NaN	NaN	NaN	NaN	NaN	NaN	NaN	NaN	NaN	NaN	NaN	NaN	NaN	NaN	NaN	NaN	NaN	NaN	NaN	NaN	NaN	NaN	NaN	NaN	NaN	NaN	NaN	NaN	NaN	NaN	NaN	NaN	NaN	NaN	NaN
Costa Rica Dome	2010.06	5	60	NaN	NaN	NaN	NaN	NaN	NaN	NaN	NaN	NaN	NaN	NaN	NaN	NaN	NaN	NaN	NaN	NaN	NaN	NaN	NaN	NaN	NaN	NaN	NaN	NaN	NaN	NaN	NaN	NaN	NaN	NaN	NaN	NaN	NaN	NaN	NaN	NaN	NaN	NaN	NaN
Costa Rica Dome	2010.06	5	70	NaN	NaN	NaN	NaN	NaN	NaN	29.1712	1.30905	NaN	NaN	0.586464	0.0819252	NaN	NaN	19.3265	0.86878	0.0805	0.00807221	0.183768	0.0321648	0.087093	0.029345	0.010777	0.134656	0.199201	0.199274	NaN	NaN	NaN	NaN	NaN	NaN	NaN	NaN	0.210633	0.0346851	NaN	NaN	NaN	NaN
Costa Rica Dome	2010.06	5	80	NaN	NaN	NaN	NaN	NaN	NaN	NaN	NaN	NaN	NaN	NaN	NaN	NaN	NaN	NaN	NaN	NaN	NaN	NaN	NaN	NaN	NaN	NaN	NaN	NaN	NaN	NaN	NaN	NaN	NaN	NaN	NaN	NaN	NaN	NaN	NaN	NaN	NaN	NaN	NaN
Gulf of Mexico	2017.05	1	2	NaN	NaN	NaN	NaN	NaN	NaN	NaN	NaN	NaN	NaN	NaN	NaN	NaN	NaN	NaN	NaN	NaN	NaN	NaN	NaN	NaN	NaN	NaN	NaN	NaN	NaN	NaN	NaN	NaN	NaN	NaN	NaN	NaN	NaN	NaN	NaN	NaN	NaN	NaN	NaN
Gulf of Mexico	2017.05	1	5	NaN	NaN	NaN	NaN	NaN	NaN	0.00885813	0.00628493	0.0663108	0.0299106	1.25348	0.113383	NaN	NaN	NaN	NaN	NaN	NaN	0.106577	0.0378592	0.41948	0.0662771	0.376422	0.117643	0.256417	0.153619	0.395104	0.122343	0.632954	0.185449	0.395104	0.122343	0.632954	0.185449	0.013663	0.00259207	NaN	NaN	NaN	NaN
Gulf of Mexico	2017.05	1	8	NaN	NaN	NaN	NaN	NaN	NaN	NaN	NaN	NaN	NaN	NaN	NaN	NaN	NaN	NaN	NaN	NaN	NaN	NaN	NaN	NaN	NaN	NaN	NaN	NaN	NaN	NaN	NaN	NaN	NaN	NaN	NaN	NaN	NaN	NaN	NaN	NaN	NaN	NaN	NaN
Gulf of Mexico	2017.05	1	12	NaN	NaN	NaN	NaN	NaN	NaN	NaN	NaN	NaN	NaN	NaN	NaN	NaN	NaN	NaN	NaN	NaN	NaN	NaN	NaN	NaN	NaN	NaN	NaN	NaN	NaN	NaN	NaN	NaN	NaN	NaN	NaN	NaN	NaN	NaN	NaN	NaN	NaN	NaN	NaN
Gulf of Mexico	2017.05	1	20	NaN	NaN	NaN	NaN	NaN	NaN	0.0264863	0.00737304	0.068332	0.0110758	0.952919	0.0526459	NaN	NaN	NaN	NaN	NaN	NaN	0.0690942	0.00959631	0.262997	0.0226304	0.67337	0.393738	0.380911	0.351163	0.34928	0.126676	0.417495	0.11788	0.34928	0.126676	0.417495	0.11788	0.0285359	0.00504785	NaN	NaN	NaN	NaN
Gulf of Mexico	2017.05	1	25	NaN	NaN	NaN	NaN	NaN	NaN	NaN	NaN	NaN	NaN	NaN	NaN	NaN	NaN	NaN	NaN	NaN	NaN	NaN	NaN	NaN	NaN	NaN	NaN	NaN	NaN	NaN	NaN	NaN	NaN	NaN	NaN	NaN	NaN	NaN	NaN	NaN	NaN	NaN	NaN
Gulf of Mexico	2017.05	1	30	NaN	NaN	NaN	NaN	NaN	NaN	0.0205555	0.00732734	0.0953919	0.013498	0.887485	0.0571849	NaN	NaN	NaN	NaN	NaN	NaN	0.0928685	0.00993983	0.26076	0.0208285	0.431003	0.117958	0.435305	0.117983	0.539193	0.118583	0.215401	0.116714	0.539193	0.118583	0.215401	0.116714	0.0300661	0.00231322	NaN	NaN	NaN	NaN
Gulf of Mexico	2017.05	1	35	NaN	NaN	NaN	NaN	NaN	NaN	NaN	NaN	NaN	NaN	NaN	NaN	NaN	NaN	NaN	NaN	NaN	NaN	NaN	NaN	NaN	NaN	NaN	NaN	NaN	NaN	NaN	NaN	NaN	NaN	NaN	NaN	NaN	NaN	NaN	NaN	NaN	NaN	NaN	NaN
Gulf of Mexico	2017.05	1	40	NaN	NaN	NaN	NaN	NaN	NaN	NaN	NaN	NaN	NaN	NaN	NaN	NaN	NaN	NaN	NaN	NaN	NaN	NaN	NaN	NaN	NaN	NaN	NaN	NaN	NaN	NaN	NaN	NaN	NaN	NaN	NaN	NaN	NaN	NaN	NaN	NaN	NaN	NaN	NaN
Gulf of Mexico	2017.05	1	45	NaN	NaN	NaN	NaN	NaN	NaN	NaN	NaN	NaN	NaN	NaN	NaN	NaN	NaN	NaN	NaN	NaN	NaN	NaN	NaN	NaN	NaN	NaN	NaN	NaN	NaN	NaN	NaN	NaN	NaN	NaN	NaN	NaN	NaN	NaN	NaN	NaN	NaN	NaN	NaN
Gulf of Mexico	2017.05	1	50	NaN	NaN	NaN	NaN	NaN	NaN	0.0171632	0.00676442	0.106588	0.0430099	1.09802	0.119476	NaN	NaN	NaN	NaN	NaN	NaN	0.124391	0.0071817	0.235076	0.0193456	0.445606	0.118043	0.392982	0.117739	0.433713	0.117974	0.279374	0.117083	0.433713	0.117974	0.279374	0.117083	0.0190635	0.00342861	NaN	NaN	NaN	NaN
Gulf of Mexico	2017.05	1	55	NaN	NaN	NaN	NaN	NaN	NaN	NaN	NaN	NaN	NaN	NaN	NaN	NaN	NaN	NaN	NaN	NaN	NaN	NaN	NaN	NaN	NaN	NaN	NaN	NaN	NaN	NaN	NaN	NaN	NaN	NaN	NaN	NaN	NaN	NaN	NaN	NaN	NaN	NaN	NaN
Gulf of Mexico	2017.05	1	60	NaN	NaN	NaN	NaN	NaN	NaN	NaN	NaN	NaN	NaN	NaN	NaN	NaN	NaN	NaN	NaN	NaN	NaN	NaN	NaN	NaN	NaN	NaN	NaN	NaN	NaN	NaN	NaN	NaN	NaN	NaN	NaN	NaN	NaN	NaN	NaN	NaN	NaN	NaN	NaN
Gulf of Mexico	2017.05	1	70	NaN	NaN	NaN	NaN	NaN	NaN	0.0199505	0.0102957	0.132322	0.0182047	0.926495	0.103633	NaN	NaN	NaN	NaN	NaN	NaN	0.162918	0.00940607	0.168631	0.0155094	0.60269	0.15114	0.370087	0.218102	0.303276	0.117221	0.148126	0.116325	0.303276	0.117221	0.148126	0.116325	0.0209684	0.00527944	NaN	NaN	NaN	NaN
Gulf of Mexico	2017.05	1	80	NaN	NaN	NaN	NaN	NaN	NaN	NaN	NaN	NaN	NaN	NaN	NaN	NaN	NaN	NaN	NaN	NaN	NaN	NaN	NaN	NaN	NaN	NaN	NaN	NaN	NaN	NaN	NaN	NaN	NaN	NaN	NaN	NaN	NaN	NaN	NaN	NaN	NaN	NaN	NaN
Gulf of Mexico	2017.05	1	90	NaN	NaN	NaN	NaN	NaN	NaN	NaN	NaN	NaN	NaN	NaN	NaN	NaN	NaN	NaN	NaN	NaN	NaN	NaN	NaN	NaN	NaN	NaN	NaN	NaN	NaN	NaN	NaN	NaN	NaN	NaN	NaN	NaN	NaN	NaN	NaN	NaN	NaN	NaN	NaN
Gulf of Mexico	2017.05	1	100	NaN	NaN	NaN	NaN	NaN	NaN	0.176473	0.09374	0.0979957	0.0293038	1.02352	0.0561758	NaN	NaN	NaN	NaN	NaN	NaN	0.437096	0.0304376	0.285778	0.107666	0.0603506	0.115818	0.146838	0.116318	0.0518286	0.115769	0.0998987	0.116047	0.0518286	0.115769	0.0998987	0.116047	0.104289	0.0966702	NaN	NaN	NaN	NaN
Gulf of Mexico	2017.05	1	110	NaN	NaN	NaN	NaN	NaN	NaN	NaN	NaN	NaN	NaN	NaN	NaN	NaN	NaN	NaN	NaN	NaN	NaN	NaN	NaN	NaN	NaN	NaN	NaN	NaN	NaN	NaN	NaN	NaN	NaN	NaN	NaN	NaN	NaN	NaN	NaN	NaN	NaN	NaN	NaN
Gulf of Mexico	2017.05	1	120	NaN	NaN	NaN	NaN	NaN	NaN	1.41344	0.86604	NaN	NaN	NaN	NaN	NaN	NaN	NaN	NaN	NaN	NaN	NaN	NaN	NaN	NaN	NaN	NaN	NaN	NaN	NaN	NaN	NaN	NaN	NaN	NaN	NaN	NaN	NaN	NaN	NaN	NaN	NaN	NaN
Gulf of Mexico	2017.05	1	130	NaN	NaN	NaN	NaN	NaN	NaN	NaN	NaN	NaN	NaN	NaN	NaN	NaN	NaN	NaN	NaN	NaN	NaN	NaN	NaN	NaN	NaN	NaN	NaN	NaN	NaN	NaN	NaN	NaN	NaN	NaN	NaN	NaN	NaN	NaN	NaN	NaN	NaN	NaN	NaN
Gulf of Mexico	2017.05	2	2	NaN	NaN	NaN	NaN	NaN	NaN	NaN	NaN	NaN	NaN	NaN	NaN	NaN	NaN	NaN	NaN	NaN	NaN	NaN	NaN	NaN	NaN	NaN	NaN	NaN	NaN	NaN	NaN	NaN	NaN	NaN	NaN	NaN	NaN	NaN	NaN	NaN	NaN	NaN	NaN
Gulf of Mexico	2017.05	2	5	NaN	NaN	NaN	NaN	NaN	NaN	0.00949719	0.00632182	0.0529187	0.0116748	1.13419	0.201523	NaN	NaN	NaN	NaN	NaN	NaN	0.0490346	0.00490346	0.266974	0.025949	0.396493	0.203965	0.379297	0.203793	0.408112	0.204081	0.73451	0.207345	0.408112	0.204081	0.73451	0.207345	0.0123715	0.0015819	NaN	NaN	NaN	NaN
Gulf of Mexico	2017.05	2	8	NaN	NaN	NaN	NaN	NaN	NaN	NaN	NaN	NaN	NaN	NaN	NaN	NaN	NaN	NaN	NaN	NaN	NaN	NaN	NaN	NaN	NaN	NaN	NaN	NaN	NaN	NaN	NaN	NaN	NaN	NaN	NaN	NaN	NaN	NaN	NaN	NaN	NaN	NaN	NaN
Gulf of Mexico	2017.05	2	12	NaN	NaN	NaN	NaN	NaN	NaN	NaN	NaN	NaN	NaN	NaN	NaN	NaN	NaN	NaN	NaN	NaN	NaN	NaN	NaN	NaN	NaN	NaN	NaN	NaN	NaN	NaN	NaN	NaN	NaN	NaN	NaN	NaN	NaN	NaN	NaN	NaN	NaN	NaN	NaN
Gulf of Mexico	2017.05	2	20	NaN	NaN	NaN	NaN	NaN	NaN	0.0122959	0.00754732	0.0761879	0.0233334	0.903554	0.14645	NaN	NaN	NaN	NaN	NaN	NaN	0.0593032	0.00593032	0.270281	0.0401295	0.565959	0.20566	0.54578	0.205458	0.772722	0.207727	0.540328	0.205403	0.772722	0.207727	0.540328	0.205403	0.0136095	0.00266272	NaN	NaN	NaN	NaN
Gulf of Mexico	2017.05	2	25	NaN	NaN	NaN	NaN	NaN	NaN	NaN	NaN	NaN	NaN	NaN	NaN	NaN	NaN	NaN	NaN	NaN	NaN	NaN	NaN	NaN	NaN	NaN	NaN	NaN	NaN	NaN	NaN	NaN	NaN	NaN	NaN	NaN	NaN	NaN	NaN	NaN	NaN	NaN	NaN
Gulf of Mexico	2017.05	2	30	NaN	NaN	NaN	NaN	NaN	NaN	NaN	NaN	NaN	NaN	NaN	NaN	NaN	NaN	NaN	NaN	NaN	NaN	NaN	NaN	NaN	NaN	NaN	NaN	NaN	NaN	NaN	NaN	NaN	NaN	NaN	NaN	NaN	NaN	NaN	NaN	NaN	NaN	NaN	NaN
Gulf of Mexico	2017.05	2	35	NaN	NaN	NaN	NaN	NaN	NaN	NaN	NaN	NaN	NaN	NaN	NaN	NaN	NaN	NaN	NaN	NaN	NaN	NaN	NaN	NaN	NaN	NaN	NaN	NaN	NaN	NaN	NaN	NaN	NaN	NaN	NaN	NaN	NaN	NaN	NaN	NaN	NaN	NaN	NaN
Gulf of Mexico	2017.05	2	40	NaN	NaN	NaN	NaN	NaN	NaN	0.00675634	0.00616358	0.0666473	0.00962138	0.878513	0.0855038	NaN	NaN	NaN	NaN	NaN	NaN	0.0695718	0.00695718	0.245564	0.0256608	NaN	NaN	NaN	NaN	0.378084	0.203781	0.236524	0.202365	0.378084	0.203781	0.236524	0.202365	0.00947953	0.00137741	NaN	NaN	NaN	NaN
Gulf of Mexico	2017.05	2	45	NaN	NaN	NaN	NaN	NaN	NaN	NaN	NaN	NaN	NaN	NaN	NaN	NaN	NaN	NaN	NaN	NaN	NaN	NaN	NaN	NaN	NaN	NaN	NaN	NaN	NaN	NaN	NaN	NaN	NaN	NaN	NaN	NaN	NaN	NaN	NaN	NaN	NaN	NaN	NaN
Gulf of Mexico	2017.05	2	50	NaN	NaN	NaN	NaN	NaN	NaN	NaN	NaN	NaN	NaN	NaN	NaN	NaN	NaN	NaN	NaN	NaN	NaN	NaN	NaN	NaN	NaN	NaN	NaN	NaN	NaN	NaN	NaN	NaN	NaN	NaN	NaN	NaN	NaN	NaN	NaN	NaN	NaN	NaN	NaN
Gulf of Mexico	2017.05	2	55	NaN	NaN	NaN	NaN	NaN	NaN	NaN	NaN	NaN	NaN	NaN	NaN	NaN	NaN	NaN	NaN	NaN	NaN	NaN	NaN	NaN	NaN	NaN	NaN	NaN	NaN	NaN	NaN	NaN	NaN	NaN	NaN	NaN	NaN	NaN	NaN	NaN	NaN	NaN	NaN
Gulf of Mexico	2017.05	2	60	NaN	NaN	NaN	NaN	NaN	NaN	0.0213203	0.00909223	0.0746817	0.0126981	0.903207	0.0794202	NaN	NaN	NaN	NaN	NaN	NaN	0.106666	0.0106666	0.204909	0.0215603	0.130759	0.201308	0.127995	0.20128	0.157635	0.201576	-0.0242359	0.199758	0.157635	0.201576	-0.0242359	0.199758	0.0207215	0.00412216	NaN	NaN	NaN	NaN
Gulf of Mexico	2017.05	2	70	NaN	NaN	NaN	NaN	NaN	NaN	NaN	NaN	NaN	NaN	NaN	NaN	NaN	NaN	NaN	NaN	NaN	NaN	NaN	NaN	NaN	NaN	NaN	NaN	NaN	NaN	NaN	NaN	NaN	NaN	NaN	NaN	NaN	NaN	NaN	NaN	NaN	NaN	NaN	NaN
Gulf of Mexico	2017.05	2	80	NaN	NaN	NaN	NaN	NaN	NaN	0.0219825	0.0131789	0.078602	0.0183664	1.08691	0.146508	NaN	NaN	NaN	NaN	NaN	NaN	0.222884	0.0222884	0.174039	0.0227155	0.174771	0.201748	0.268743	0.202687	0.0994291	0.200994	0.0533459	0.200533	0.0994291	0.200994	0.0533459	0.200533	0.0160316	0.00198344	NaN	NaN	NaN	NaN
Gulf of Mexico	2017.05	2	90	NaN	NaN	NaN	NaN	NaN	NaN	NaN	NaN	NaN	NaN	NaN	NaN	NaN	NaN	NaN	NaN	NaN	NaN	NaN	NaN	NaN	NaN	NaN	NaN	NaN	NaN	NaN	NaN	NaN	NaN	NaN	NaN	NaN	NaN	NaN	NaN	NaN	NaN	NaN	NaN
Gulf of Mexico	2017.05	2	100	NaN	NaN	NaN	NaN	NaN	NaN	0	0.01	NaN	NaN	NaN	NaN	NaN	NaN	NaN	NaN	NaN	NaN	NaN	NaN	NaN	NaN	NaN	NaN	NaN	NaN	NaN	NaN	NaN	NaN	NaN	NaN	NaN	NaN	NaN	NaN	NaN	NaN	NaN	NaN
Gulf of Mexico	2017.05	2	110	NaN	NaN	NaN	NaN	NaN	NaN	NaN	NaN	NaN	NaN	NaN	NaN	NaN	NaN	NaN	NaN	NaN	NaN	NaN	NaN	NaN	NaN	NaN	NaN	NaN	NaN	NaN	NaN	NaN	NaN	NaN	NaN	NaN	NaN	NaN	NaN	NaN	NaN	NaN	NaN
Gulf of Mexico	2017.05	3	2	NaN	NaN	NaN	NaN	NaN	NaN	NaN	NaN	NaN	NaN	NaN	NaN	NaN	NaN	NaN	NaN	NaN	NaN	NaN	NaN	NaN	NaN	NaN	NaN	NaN	NaN	NaN	NaN	NaN	NaN	NaN	NaN	NaN	NaN	NaN	NaN	NaN	NaN	NaN	NaN
Gulf of Mexico	2017.05	3	5	NaN	NaN	NaN	NaN	NaN	NaN	0.0120737	0.00560369	0.0811699	0.0144593	1.26475	0.130206	NaN	NaN	NaN	NaN	NaN	NaN	0.0802384	0.00670231	0.407781	0.0359056	0.0165505	0.118823	0.293681	0.117166	0.609061	0.206091	0.744176	0.207442	0.609061	0.206091	0.744176	0.207442	0.00873739	0.00429826	NaN	NaN	NaN	NaN
Gulf of Mexico	2017.05	3	8	NaN	NaN	NaN	NaN	NaN	NaN	NaN	NaN	NaN	NaN	NaN	NaN	NaN	NaN	NaN	NaN	NaN	NaN	NaN	NaN	NaN	NaN	NaN	NaN	NaN	NaN	NaN	NaN	NaN	NaN	NaN	NaN	NaN	NaN	NaN	NaN	NaN	NaN	NaN	NaN
Gulf of Mexico	2017.05	3	12	NaN	NaN	NaN	NaN	NaN	NaN	NaN	NaN	NaN	NaN	NaN	NaN	NaN	NaN	NaN	NaN	NaN	NaN	NaN	NaN	NaN	NaN	NaN	NaN	NaN	NaN	NaN	NaN	NaN	NaN	NaN	NaN	NaN	NaN	NaN	NaN	NaN	NaN	NaN	NaN
Gulf of Mexico	2017.05	3	20	NaN	NaN	NaN	NaN	NaN	NaN	0.00767997	0.005384	0.0896946	0.0141174	1.09648	0.111841	NaN	NaN	NaN	NaN	NaN	NaN	0.0976977	0.0360233	0.371484	0.033339	0.454441	0.392336	0.347917	0.132775	0.560933	0.205609	0.243464	0.202435	0.560933	0.205609	0.243464	0.202435	0.00401953	0.000991331	NaN	NaN	NaN	NaN
Gulf of Mexico	2017.05	3	25	NaN	NaN	NaN	NaN	NaN	NaN	NaN	NaN	NaN	NaN	NaN	NaN	NaN	NaN	NaN	NaN	NaN	NaN	NaN	NaN	NaN	NaN	NaN	NaN	NaN	NaN	NaN	NaN	NaN	NaN	NaN	NaN	NaN	NaN	NaN	NaN	NaN	NaN	NaN	NaN
Gulf of Mexico	2017.05	3	30	NaN	NaN	NaN	NaN	NaN	NaN	NaN	NaN	NaN	NaN	NaN	NaN	NaN	NaN	NaN	NaN	NaN	NaN	NaN	NaN	NaN	NaN	NaN	NaN	NaN	NaN	NaN	NaN	NaN	NaN	NaN	NaN	NaN	NaN	NaN	NaN	NaN	NaN	NaN	NaN
Gulf of Mexico	2017.05	3	35	NaN	NaN	NaN	NaN	NaN	NaN	NaN	NaN	NaN	NaN	NaN	NaN	NaN	NaN	NaN	NaN	NaN	NaN	NaN	NaN	NaN	NaN	NaN	NaN	NaN	NaN	NaN	NaN	NaN	NaN	NaN	NaN	NaN	NaN	NaN	NaN	NaN	NaN	NaN	NaN
Gulf of Mexico	2017.05	3	40	NaN	NaN	NaN	NaN	NaN	NaN	0.0065	0.005325	0.0915694	0.0261053	1.20552	0.267164	NaN	NaN	NaN	NaN	NaN	NaN	0.0733661	0.00510161	0.249475	0.0247116	0.498731	0.118349	0.168378	0.116442	0.279427	0.202794	0.061673	0.200617	0.279427	0.202794	0.061673	0.200617	0.00616455	0.00134256	NaN	NaN	NaN	NaN
Gulf of Mexico	2017.05	3	45	NaN	NaN	NaN	NaN	NaN	NaN	NaN	NaN	NaN	NaN	NaN	NaN	NaN	NaN	NaN	NaN	NaN	NaN	NaN	NaN	NaN	NaN	NaN	NaN	NaN	NaN	NaN	NaN	NaN	NaN	NaN	NaN	NaN	NaN	NaN	NaN	NaN	NaN	NaN	NaN
Gulf of Mexico	2017.05	3	50	NaN	NaN	NaN	NaN	NaN	NaN	NaN	NaN	NaN	NaN	NaN	NaN	NaN	NaN	NaN	NaN	NaN	NaN	NaN	NaN	NaN	NaN	NaN	NaN	NaN	NaN	NaN	NaN	NaN	NaN	NaN	NaN	NaN	NaN	NaN	NaN	NaN	NaN	NaN	NaN
Gulf of Mexico	2017.05	3	55	NaN	NaN	NaN	NaN	NaN	NaN	NaN	NaN	NaN	NaN	NaN	NaN	NaN	NaN	NaN	NaN	NaN	NaN	NaN	NaN	NaN	NaN	NaN	NaN	NaN	NaN	NaN	NaN	NaN	NaN	NaN	NaN	NaN	NaN	NaN	NaN	NaN	NaN	NaN	NaN
Gulf of Mexico	2017.05	3	60	NaN	NaN	NaN	NaN	NaN	NaN	0.0228649	0.0163853	0.089615	0.0164042	1.17119	0.070687	NaN	NaN	NaN	NaN	NaN	NaN	0.0793457	0.00458103	0.192301	0.0338466	0.705162	0.119541	0.515538	0.118447	0.345839	0.203458	0.141312	0.201413	0.345839	0.203458	0.141312	0.201413	0.0193043	0.00672902	NaN	NaN	NaN	NaN
Gulf of Mexico	2017.05	3	70	NaN	NaN	NaN	NaN	NaN	NaN	NaN	NaN	NaN	NaN	NaN	NaN	NaN	NaN	NaN	NaN	NaN	NaN	NaN	NaN	NaN	NaN	NaN	NaN	NaN	NaN	NaN	NaN	NaN	NaN	NaN	NaN	NaN	NaN	NaN	NaN	NaN	NaN	NaN	NaN
Gulf of Mexico	2017.05	3	80	NaN	NaN	NaN	NaN	NaN	NaN	0.0258242	0.00635244	0.114225	0.0362974	1.02389	0.159931	NaN	NaN	NaN	NaN	NaN	NaN	0.119402	0.00858566	0.0807571	0.0180757	0.377037	0.117647	0.0591559	0.115812	-0.0818686	0.199181	-0.168753	0.198312	-0.0818686	0.199181	-0.168753	0.198312	0.00296415	0.00129642	NaN	NaN	NaN	NaN
Gulf of Mexico	2017.05	3	90	NaN	NaN	NaN	NaN	NaN	NaN	NaN	NaN	NaN	NaN	NaN	NaN	NaN	NaN	NaN	NaN	NaN	NaN	NaN	NaN	NaN	NaN	NaN	NaN	NaN	NaN	NaN	NaN	NaN	NaN	NaN	NaN	NaN	NaN	NaN	NaN	NaN	NaN	NaN	NaN
Gulf of Mexico	2017.05	3	100	NaN	NaN	NaN	NaN	NaN	NaN	0	0.01	NaN	NaN	NaN	NaN	NaN	NaN	NaN	NaN	NaN	NaN	NaN	NaN	NaN	NaN	NaN	NaN	NaN	NaN	NaN	NaN	NaN	NaN	NaN	NaN	NaN	NaN	NaN	NaN	NaN	NaN	NaN	NaN
Gulf of Mexico	2017.05	3	110	NaN	NaN	NaN	NaN	NaN	NaN	NaN	NaN	NaN	NaN	NaN	NaN	NaN	NaN	NaN	NaN	NaN	NaN	NaN	NaN	NaN	NaN	NaN	NaN	NaN	NaN	NaN	NaN	NaN	NaN	NaN	NaN	NaN	NaN	NaN	NaN	NaN	NaN	NaN	NaN
Gulf of Mexico	2017.05	3	120	NaN	NaN	NaN	NaN	NaN	NaN	1.41344	0.86604	NaN	NaN	NaN	NaN	NaN	NaN	NaN	NaN	NaN	NaN	NaN	NaN	NaN	NaN	NaN	NaN	NaN	NaN	NaN	NaN	NaN	NaN	NaN	NaN	NaN	NaN	NaN	NaN	NaN	NaN	NaN	NaN
Gulf of Mexico	2017.05	3	130	NaN	NaN	NaN	NaN	NaN	NaN	NaN	NaN	NaN	NaN	NaN	NaN	NaN	NaN	NaN	NaN	NaN	NaN	NaN	NaN	NaN	NaN	NaN	NaN	NaN	NaN	NaN	NaN	NaN	NaN	NaN	NaN	NaN	NaN	NaN	NaN	NaN	NaN	NaN	NaN
Gulf of Mexico	2017.05	3	140	NaN	NaN	NaN	NaN	NaN	NaN	NaN	NaN	NaN	NaN	NaN	NaN	NaN	NaN	NaN	NaN	NaN	NaN	NaN	NaN	NaN	NaN	NaN	NaN	NaN	NaN	NaN	NaN	NaN	NaN	NaN	NaN	NaN	NaN	NaN	NaN	NaN	NaN	NaN	NaN
Gulf of Mexico	2017.05	3	150	NaN	NaN	NaN	NaN	NaN	NaN	5.70888	2.39343	NaN	NaN	NaN	NaN	NaN	NaN	NaN	NaN	NaN	NaN	NaN	NaN	NaN	NaN	NaN	NaN	NaN	NaN	NaN	NaN	NaN	NaN	NaN	NaN	NaN	NaN	NaN	NaN	NaN	NaN	NaN	NaN
Gulf of Mexico	2018.05	4	2	NaN	NaN	NaN	NaN	NaN	NaN	NaN	NaN	NaN	NaN	NaN	NaN	NaN	NaN	NaN	NaN	NaN	NaN	NaN	NaN	NaN	NaN	NaN	NaN	NaN	NaN	NaN	NaN	NaN	NaN	NaN	NaN	NaN	NaN	NaN	NaN	NaN	NaN	NaN	NaN
Gulf of Mexico	2018.05	4	5	NaN	NaN	NaN	NaN	NaN	NaN	0.0124331	0.00606607	0.0265528	0.00632764	0.56109	0.0295649	NaN	NaN	NaN	NaN	NaN	NaN	0.0993041	0.0113658	0.358967	0.0327687	0.442366	0.109515	0.469303	0.118475	0.680713	0.18054	0.592923	0.160654	0.680713	0.18054	0.592923	0.160654	0.0118114	0.00193326	NaN	NaN	NaN	NaN
Gulf of Mexico	2018.05	4	8	NaN	NaN	NaN	NaN	NaN	NaN	NaN	NaN	NaN	NaN	NaN	NaN	NaN	NaN	NaN	NaN	NaN	NaN	NaN	NaN	NaN	NaN	NaN	NaN	NaN	NaN	NaN	NaN	NaN	NaN	NaN	NaN	NaN	NaN	NaN	NaN	NaN	NaN	NaN	NaN
Gulf of Mexico	2018.05	4	12	NaN	NaN	NaN	NaN	NaN	NaN	NaN	NaN	NaN	NaN	NaN	NaN	NaN	NaN	NaN	NaN	NaN	NaN	NaN	NaN	NaN	NaN	NaN	NaN	NaN	NaN	NaN	NaN	NaN	NaN	NaN	NaN	NaN	NaN	NaN	NaN	NaN	NaN	NaN	NaN
Gulf of Mexico	2018.05	4	20	NaN	NaN	NaN	NaN	NaN	NaN	0.00676174	0.00533809	0.0248359	0.00624179	0.515064	0.0325866	NaN	NaN	NaN	NaN	NaN	NaN	0.0794224	0.00783199	0.348758	0.0224379	0.578237	0.102891	0.37539	0.101877	0.684932	0.103425	0.44524	0.102226	0.684932	0.103425	0.44524	0.102226	0.00522107	0.00153613	NaN	NaN	NaN	NaN
Gulf of Mexico	2018.05	4	25	NaN	NaN	NaN	NaN	NaN	NaN	NaN	NaN	NaN	NaN	NaN	NaN	NaN	NaN	NaN	NaN	NaN	NaN	NaN	NaN	NaN	NaN	NaN	NaN	NaN	NaN	NaN	NaN	NaN	NaN	NaN	NaN	NaN	NaN	NaN	NaN	NaN	NaN	NaN	NaN
Gulf of Mexico	2018.05	4	30	NaN	NaN	NaN	NaN	NaN	NaN	NaN	NaN	NaN	NaN	NaN	NaN	NaN	NaN	NaN	NaN	NaN	NaN	NaN	NaN	NaN	NaN	NaN	NaN	NaN	NaN	NaN	NaN	NaN	NaN	NaN	NaN	NaN	NaN	NaN	NaN	NaN	NaN	NaN	NaN
Gulf of Mexico	2018.05	4	35	NaN	NaN	NaN	NaN	NaN	NaN	NaN	NaN	NaN	NaN	NaN	NaN	NaN	NaN	NaN	NaN	NaN	NaN	NaN	NaN	NaN	NaN	NaN	NaN	NaN	NaN	NaN	NaN	NaN	NaN	NaN	NaN	NaN	NaN	NaN	NaN	NaN	NaN	NaN	NaN
Gulf of Mexico	2018.05	4	40	NaN	NaN	NaN	NaN	NaN	NaN	0.007172	0.0053586	0.025203	0.00626015	0.479447	0.0348769	NaN	NaN	NaN	NaN	NaN	NaN	0.085612	0.0042806	0.271713	0.0248445	0.667249	0.103336	0.582798	0.28367	0.672504	0.103962	0.569761	0.185922	0.672504	0.103962	0.569761	0.185922	0.00742432	0.000871216	NaN	NaN	NaN	NaN
Gulf of Mexico	2018.05	4	45	NaN	NaN	NaN	NaN	NaN	NaN	0.0127051	0.0112705	0.037539	0.0137539	NaN	NaN	NaN	NaN	NaN	NaN	NaN	NaN	NaN	NaN	NaN	NaN	NaN	NaN	NaN	NaN	NaN	NaN	NaN	NaN	NaN	NaN	NaN	NaN	NaN	NaN	NaN	NaN	NaN	NaN
Gulf of Mexico	2018.05	4	50	NaN	NaN	NaN	NaN	NaN	NaN	NaN	NaN	NaN	NaN	NaN	NaN	NaN	NaN	NaN	NaN	NaN	NaN	NaN	NaN	NaN	NaN	NaN	NaN	NaN	NaN	NaN	NaN	NaN	NaN	NaN	NaN	NaN	NaN	NaN	NaN	NaN	NaN	NaN	NaN
Gulf of Mexico	2018.05	4	55	NaN	NaN	NaN	NaN	NaN	NaN	0.00995263	0.00634812	0.0300761	0.00750994	0.420046	0.0232572	NaN	NaN	NaN	NaN	NaN	NaN	0.106702	0.010134	0.246156	0.0272697	0.839914	0.1042	0.565462	0.113712	0.475531	0.102378	0.210676	0.101053	0.475531	0.102378	0.210676	0.101053	0.00627885	0.00139731	NaN	NaN	NaN	NaN
Gulf of Mexico	2018.05	4	60	NaN	NaN	NaN	NaN	NaN	NaN	0.0025	0.01025	0.0249629	0.0124963	NaN	NaN	NaN	NaN	NaN	NaN	NaN	NaN	NaN	NaN	NaN	NaN	NaN	NaN	NaN	NaN	NaN	NaN	NaN	NaN	NaN	NaN	NaN	NaN	NaN	NaN	NaN	NaN	NaN	NaN
Gulf of Mexico	2018.05	4	70	NaN	NaN	NaN	NaN	NaN	NaN	NaN	NaN	NaN	NaN	NaN	NaN	NaN	NaN	NaN	NaN	NaN	NaN	NaN	NaN	NaN	NaN	NaN	NaN	NaN	NaN	NaN	NaN	NaN	NaN	NaN	NaN	NaN	NaN	NaN	NaN	NaN	NaN	NaN	NaN
Gulf of Mexico	2018.05	4	80	NaN	NaN	NaN	NaN	NaN	NaN	0.010863	0.00554315	0.025822	0.0062911	0.475319	0.0257291	NaN	NaN	NaN	NaN	NaN	NaN	0.241331	0.0275859	0.215083	0.0559527	0.610321	0.103052	0.329399	0.101647	0.27283	0.101364	0.152891	0.100764	0.27283	0.101364	0.152891	0.100764	0.00459635	0.000729817	NaN	NaN	NaN	NaN
Gulf of Mexico	2018.05	4	90	NaN	NaN	NaN	NaN	NaN	NaN	NaN	NaN	NaN	NaN	NaN	NaN	NaN	NaN	NaN	NaN	NaN	NaN	NaN	NaN	NaN	NaN	NaN	NaN	NaN	NaN	NaN	NaN	NaN	NaN	NaN	NaN	NaN	NaN	NaN	NaN	NaN	NaN	NaN	NaN
Gulf of Mexico	2018.05	4	100	NaN	NaN	NaN	NaN	NaN	NaN	NaN	NaN	NaN	NaN	NaN	NaN	NaN	NaN	NaN	NaN	NaN	NaN	NaN	NaN	NaN	NaN	NaN	NaN	NaN	NaN	NaN	NaN	NaN	NaN	NaN	NaN	NaN	NaN	NaN	NaN	NaN	NaN	NaN	NaN
Gulf of Mexico	2018.05	4	110	NaN	NaN	NaN	NaN	NaN	NaN	NaN	NaN	NaN	NaN	0.462749	0.0562749	NaN	NaN	NaN	NaN	NaN	NaN	0.56769	0.056769	0.12659	0.0287169	0.420574	0.204206	0.469777	0.204698	0.218195	0.202182	0.213052	0.202131	0.218195	0.202182	0.213052	0.202131	0.0057958	0.00280064	NaN	NaN	NaN	NaN
Gulf of Mexico	2018.05	4	120	NaN	NaN	NaN	NaN	NaN	NaN	1.5618	0.565329	0.0328331	0.0132833	NaN	NaN	NaN	NaN	NaN	NaN	NaN	NaN	NaN	NaN	NaN	NaN	NaN	NaN	NaN	NaN	NaN	NaN	NaN	NaN	NaN	NaN	NaN	NaN	NaN	NaN	NaN	NaN	NaN	NaN
Gulf of Mexico	2018.05	4	130	NaN	NaN	NaN	NaN	NaN	NaN	2.30919	0.584683	NaN	NaN	NaN	NaN	NaN	NaN	NaN	NaN	NaN	NaN	NaN	NaN	NaN	NaN	NaN	NaN	NaN	NaN	NaN	NaN	NaN	NaN	NaN	NaN	NaN	NaN	NaN	NaN	NaN	NaN	NaN	NaN
Gulf of Mexico	2018.05	5	2	NaN	NaN	NaN	NaN	NaN	NaN	NaN	NaN	NaN	NaN	NaN	NaN	NaN	NaN	NaN	NaN	NaN	NaN	NaN	NaN	NaN	NaN	NaN	NaN	NaN	NaN	NaN	NaN	NaN	NaN	NaN	NaN	NaN	NaN	NaN	NaN	NaN	NaN	NaN	NaN
Gulf of Mexico	2018.05	5	5	NaN	NaN	NaN	NaN	NaN	NaN	0.0537764	0.0176831	0.0662891	0.0126006	0.78016	0.0639084	NaN	NaN	NaN	NaN	NaN	NaN	0.126709	0.0120912	0.552045	0.0342159	0.373664	0.101868	0.286012	0.10143	0.508534	0.102543	0.545445	0.102727	0.508534	0.102543	0.545445	0.102727	0.0613893	0.00356946	NaN	NaN	NaN	NaN
Gulf of Mexico	2018.05	5	8	NaN	NaN	NaN	NaN	NaN	NaN	NaN	NaN	NaN	NaN	NaN	NaN	NaN	NaN	NaN	NaN	NaN	NaN	NaN	NaN	NaN	NaN	NaN	NaN	NaN	NaN	NaN	NaN	NaN	NaN	NaN	NaN	NaN	NaN	NaN	NaN	NaN	NaN	NaN	NaN
Gulf of Mexico	2018.05	5	12	NaN	NaN	NaN	NaN	NaN	NaN	0.0102228	0.00636372	0.0468867	0.00848051	0.666385	0.0383193	NaN	NaN	NaN	NaN	NaN	NaN	0.158414	0.0226391	0.523462	0.0359956	0.438665	0.147855	0.612813	0.119008	0.345678	0.117466	0.288337	0.117135	0.345678	0.117466	0.288337	0.117135	0.0110577	0.00121576	NaN	NaN	NaN	NaN
Gulf of Mexico	2018.05	5	20	NaN	NaN	NaN	NaN	NaN	NaN	0.0202398	0.012024	0.0331675	0.0133167	1.24073	0.134073	NaN	NaN	NaN	NaN	NaN	NaN	0.105702	0.0105702	0.415123	0.0515123	0.790616	0.207906	0.543529	0.205435	0.651113	0.206511	0.644363	0.206444	0.651113	0.206511	0.644363	0.206444	0.0231905	0.00331905	NaN	NaN	NaN	NaN
Gulf of Mexico	2018.05	5	25	NaN	NaN	NaN	NaN	NaN	NaN	0.00683333	0.00616803	0.05897	0.00917814	0.603528	0.0351764	NaN	NaN	NaN	NaN	NaN	NaN	0.188813	0.0442708	0.426183	0.0303792	0.475556	0.310375	0.535842	0.318327	0.454704	0.118095	0.463477	0.118146	0.454704	0.118095	0.463477	0.118146	0.00911857	0.00110381	NaN	NaN	NaN	NaN
Gulf of Mexico	2018.05	5	30	NaN	NaN	NaN	NaN	NaN	NaN	0.0075	0.01075	0.051684	0.0151684	NaN	NaN	NaN	NaN	NaN	NaN	NaN	NaN	NaN	NaN	NaN	NaN	NaN	NaN	NaN	NaN	NaN	NaN	NaN	NaN	NaN	NaN	NaN	NaN	NaN	NaN	NaN	NaN	NaN	NaN
Gulf of Mexico	2018.05	5	35	NaN	NaN	NaN	NaN	NaN	NaN	NaN	NaN	NaN	NaN	NaN	NaN	NaN	NaN	NaN	NaN	NaN	NaN	NaN	NaN	NaN	NaN	NaN	NaN	NaN	NaN	NaN	NaN	NaN	NaN	NaN	NaN	NaN	NaN	NaN	NaN	NaN	NaN	NaN	NaN
Gulf of Mexico	2018.05	5	40	NaN	NaN	NaN	NaN	NaN	NaN	0.0336727	0.0101126	0.0555069	0.0140942	0.84393	0.13228	NaN	NaN	NaN	NaN	NaN	NaN	0.170613	0.0250654	0.260926	0.020838	0.502407	0.118371	0.305359	0.16345	0.401347	0.117787	0.429026	0.117947	0.401347	0.117787	0.429026	0.117947	0.0127094	0.00272151	NaN	NaN	NaN	NaN
Gulf of Mexico	2018.05	5	45	NaN	NaN	NaN	NaN	NaN	NaN	0.0346561	0.0134656	0.0620693	0.0162069	0.578286	0.0630833	NaN	NaN	NaN	NaN	NaN	NaN	0.155052	0.0155052	0.361865	0.0461865	0.62832	0.206283	0.363422	0.203634	0.520662	0.205207	0.532737	0.205327	0.520662	0.205207	0.532737	0.205327	0.0228454	0.00328454	NaN	NaN	NaN	NaN
Gulf of Mexico	2018.05	5	50	NaN	NaN	NaN	NaN	NaN	NaN	NaN	NaN	NaN	NaN	NaN	NaN	NaN	NaN	NaN	NaN	NaN	NaN	NaN	NaN	NaN	NaN	NaN	NaN	NaN	NaN	NaN	NaN	NaN	NaN	NaN	NaN	NaN	NaN	NaN	NaN	NaN	NaN	NaN	NaN
Gulf of Mexico	2018.05	5	55	NaN	NaN	NaN	NaN	NaN	NaN	NaN	NaN	NaN	NaN	NaN	NaN	NaN	NaN	NaN	NaN	NaN	NaN	NaN	NaN	NaN	NaN	NaN	NaN	NaN	NaN	NaN	NaN	NaN	NaN	NaN	NaN	NaN	NaN	NaN	NaN	NaN	NaN	NaN	NaN
Gulf of Mexico	2018.05	5	60	NaN	NaN	NaN	NaN	NaN	NaN	0.0162193	0.00670992	0.0573993	0.0135878	0.547523	0.0373848	NaN	NaN	NaN	NaN	NaN	NaN	0.260365	0.0275905	0.205054	0.0176123	0.611239	0.118999	0.326266	0.117354	0.461751	0.144686	0.317352	0.143665	0.461751	0.144686	0.317352	0.143665	0.00649145	0.00213874	NaN	NaN	NaN	NaN
Gulf of Mexico	2018.05	5	70	NaN	NaN	NaN	NaN	NaN	NaN	0.525928	0.0625928	0.107819	0.0207819	0.724837	0.0823535	NaN	NaN	NaN	NaN	NaN	NaN	0.752752	0.0752752	0.437335	0.0537335	0.544533	0.205445	0.357754	0.203578	0.432035	0.20432	0.520913	0.205209	0.432035	0.20432	0.520913	0.205209	0.0183295	0.00283295	NaN	NaN	NaN	NaN
Gulf of Mexico	2018.05	5	80	NaN	NaN	NaN	NaN	NaN	NaN	0.398567	0.247736	0.0792973	0.0195762	0.978133	0.362204	NaN	NaN	NaN	NaN	NaN	NaN	0.664111	0.157981	0.212703	0.0180539	0.339647	0.126313	0.11084	0.11611	0.109826	0.116104	0.0981704	0.116037	0.109826	0.116104	0.0981704	0.116037	0.00694426	0.000978278	NaN	NaN	NaN	NaN
Gulf of Mexico	2018.05	5	90	NaN	NaN	NaN	NaN	NaN	NaN	2.01372	0.211372	0.0234354	0.0123435	0.586577	0.0984114	NaN	NaN	NaN	NaN	NaN	NaN	0.485163	0.0485163	0.104298	0.0204298	0.340256	0.203403	0.136788	0.201368	0.228714	0.202287	0.0276125	0.200276	0.228714	0.202287	0.0276125	0.200276	0.00785392	0.00178539	NaN	NaN	NaN	NaN
Gulf of Mexico	2018.05	5	100	NaN	NaN	NaN	NaN	NaN	NaN	2.42226	0.252226	0.0365103	0.013651	0.449779	0.0549779	NaN	NaN	NaN	NaN	NaN	NaN	0.285096	0.0285096	0.0536908	0.0153691	0.39702	0.20397	0.130942	0.201309	0.200024	0.202	0.319064	0.203191	0.200024	0.202	0.319064	0.203191	0.0084034	0.00184034	NaN	NaN	NaN	NaN
Gulf of Mexico	2018.05	5	110	NaN	NaN	NaN	NaN	NaN	NaN	5.80967	0.590967	NaN	NaN	NaN	NaN	NaN	NaN	NaN	NaN	NaN	NaN	NaN	NaN	NaN	NaN	NaN	NaN	NaN	NaN	NaN	NaN	NaN	NaN	NaN	NaN	NaN	NaN	NaN	NaN	NaN	NaN	NaN	NaN
Gulf of Mexico	2018.05	5	120	NaN	NaN	NaN	NaN	NaN	NaN	5.59996	0.852594	NaN	NaN	NaN	NaN	NaN	NaN	NaN	NaN	NaN	NaN	NaN	NaN	NaN	NaN	NaN	NaN	NaN	NaN	NaN	NaN	NaN	NaN	NaN	NaN	NaN	NaN	NaN	NaN	NaN	NaN	NaN	NaN
Chatham Rise	2018.1	1	2	NaN	NaN	NaN	NaN	NaN	NaN	NaN	NaN	NaN	NaN	NaN	NaN	NaN	NaN	NaN	NaN	NaN	NaN	NaN	NaN	NaN	NaN	NaN	NaN	NaN	NaN	NaN	NaN	NaN	NaN	NaN	NaN	NaN	NaN	NaN	NaN	NaN	NaN	0.67094	0.101151
Chatham Rise	2018.1	1	5	NaN	NaN	NaN	NaN	NaN	NaN	7.78238	0.788238	0.442667	0.0542667	1.61631	0.135464	NaN	NaN	0.598184	0.0698184	NaN	NaN	0.6078	0.111308	1.29679	0.273542	NaN	NaN	NaN	NaN	NaN	NaN	NaN	NaN	NaN	NaN	NaN	NaN	NaN	NaN	NaN	NaN	0.383304	0.0439703
Chatham Rise	2018.1	1	8	NaN	NaN	NaN	NaN	NaN	NaN	NaN	NaN	NaN	NaN	NaN	NaN	NaN	NaN	NaN	NaN	NaN	NaN	NaN	NaN	NaN	NaN	NaN	NaN	NaN	NaN	NaN	NaN	NaN	NaN	NaN	NaN	NaN	NaN	NaN	NaN	NaN	NaN	0.238883	0.0345185
Chatham Rise	2018.1	1	12	NaN	NaN	NaN	NaN	NaN	NaN	6.68761	1.09554	0.428388	0.138139	1.66142	0.133022	NaN	NaN	0.382173	0.164411	NaN	NaN	0.6435	0.130141	1.30337	0.348417	NaN	NaN	NaN	NaN	NaN	NaN	NaN	NaN	NaN	NaN	NaN	NaN	NaN	NaN	NaN	NaN	0.131803	0.0231026
Chatham Rise	2018.1	1	20	NaN	NaN	NaN	NaN	NaN	NaN	6.878	0.749206	0.376029	0.0889216	1.66794	0.0808582	NaN	NaN	0.394042	0.172072	NaN	NaN	0.73225	0.110818	0.956926	0.123547	NaN	NaN	NaN	NaN	NaN	NaN	NaN	NaN	NaN	NaN	NaN	NaN	NaN	NaN	NaN	NaN	0.0459341	0.00988786
Chatham Rise	2018.1	1	25	NaN	NaN	NaN	NaN	NaN	NaN	7.07633	0.518618	0.2253	0.0299416	NaN	NaN	NaN	NaN	0.611358	0.184921	NaN	NaN	1.16017	0.145087	NaN	NaN	NaN	NaN	NaN	NaN	NaN	NaN	NaN	NaN	NaN	NaN	NaN	NaN	NaN	NaN	NaN	NaN	0.0245029	0.0056538
Chatham Rise	2018.1	1	30	NaN	NaN	NaN	NaN	NaN	NaN	7.42539	0.752539	0.378409	0.0478409	1.57705	0.104174	NaN	NaN	0.63023	0.073023	NaN	NaN	0.9516	0.122502	0.701251	0.211993	NaN	NaN	NaN	NaN	NaN	NaN	NaN	NaN	NaN	NaN	NaN	NaN	NaN	NaN	NaN	NaN	0.0131126	0.00317883
Chatham Rise	2018.1	1	35	NaN	NaN	NaN	NaN	NaN	NaN	NaN	NaN	NaN	NaN	NaN	NaN	NaN	NaN	NaN	NaN	NaN	NaN	NaN	NaN	NaN	NaN	NaN	NaN	NaN	NaN	NaN	NaN	NaN	NaN	NaN	NaN	NaN	NaN	NaN	NaN	NaN	NaN	0.00756998	0.00187119
Chatham Rise	2018.1	1	40	NaN	NaN	NaN	NaN	NaN	NaN	7.88353	0.548169	0.343305	0.0857382	1.1936	0.16122	NaN	NaN	0.975906	0.25105	NaN	NaN	0.9121	0.108498	0.28455	0.0447385	NaN	NaN	NaN	NaN	NaN	NaN	NaN	NaN	NaN	NaN	NaN	NaN	NaN	NaN	NaN	NaN	0.00411796	0.00105627
Chatham Rise	2018.1	1	45	NaN	NaN	NaN	NaN	NaN	NaN	NaN	NaN	NaN	NaN	NaN	NaN	NaN	NaN	NaN	NaN	NaN	NaN	NaN	NaN	NaN	NaN	NaN	NaN	NaN	NaN	NaN	NaN	NaN	NaN	NaN	NaN	NaN	NaN	NaN	NaN	NaN	NaN	0.0022585	0.000599073
Chatham Rise	2018.1	1	50	NaN	NaN	NaN	NaN	NaN	NaN	9.41155	0.420397	0.344008	0.11409	0.80387	0.125865	NaN	NaN	1.82543	0.365615	NaN	NaN	0.5896	0.0666762	0.123312	0.0150539	NaN	NaN	NaN	NaN	NaN	NaN	NaN	NaN	NaN	NaN	NaN	NaN	NaN	NaN	NaN	NaN	0.00124184	0.000338936
Chatham Rise	2018.1	2	2	NaN	NaN	NaN	NaN	NaN	NaN	NaN	NaN	NaN	NaN	NaN	NaN	NaN	NaN	NaN	NaN	NaN	NaN	NaN	NaN	NaN	NaN	NaN	NaN	NaN	NaN	NaN	NaN	NaN	NaN	NaN	NaN	NaN	NaN	NaN	NaN	NaN	NaN	0.724796	0.209236
Chatham Rise	2018.1	2	5	NaN	NaN	NaN	NaN	NaN	NaN	11.031	0.70349	0.665786	0.219084	1.31673	0.0633581	NaN	NaN	1.50436	0.633292	NaN	NaN	0.31775	0.0317762	0.712637	0.0574621	NaN	NaN	NaN	NaN	NaN	NaN	NaN	NaN	NaN	NaN	NaN	NaN	NaN	NaN	NaN	NaN	0.389585	0.0540286
Chatham Rise	2018.1	2	8	NaN	NaN	NaN	NaN	NaN	NaN	NaN	NaN	NaN	NaN	NaN	NaN	NaN	NaN	NaN	NaN	NaN	NaN	NaN	NaN	NaN	NaN	NaN	NaN	NaN	NaN	NaN	NaN	NaN	NaN	NaN	NaN	NaN	NaN	NaN	NaN	NaN	NaN	0.246802	0.0458892
Chatham Rise	2018.1	2	12	NaN	NaN	NaN	NaN	NaN	NaN	10.5847	0.534237	0.510496	0.253781	1.43184	0.151849	NaN	NaN	0.735268	0.0970174	NaN	NaN	0.29725	0.0317369	0.629068	0.122051	NaN	NaN	NaN	NaN	NaN	NaN	NaN	NaN	NaN	NaN	NaN	NaN	NaN	NaN	NaN	NaN	0.142831	0.0347445
Chatham Rise	2018.1	2	20	NaN	NaN	NaN	NaN	NaN	NaN	10.1207	0.511033	0.626517	0.327736	1.21402	0.0759835	NaN	NaN	0.824283	0.195534	NaN	NaN	0.26225	0.0131125	0.488727	0.0535944	NaN	NaN	NaN	NaN	NaN	NaN	NaN	NaN	NaN	NaN	NaN	NaN	NaN	NaN	NaN	NaN	0.054532	0.0172964
Chatham Rise	2018.1	2	25	NaN	NaN	NaN	NaN	NaN	NaN	9.54353	1.49614	0.299871	0.131909	NaN	NaN	NaN	NaN	1.19162	0.295634	NaN	NaN	0.465333	0.0986447	NaN	NaN	NaN	NaN	NaN	NaN	NaN	NaN	NaN	NaN	NaN	NaN	NaN	NaN	NaN	NaN	NaN	NaN	0.0312081	0.0110673
Chatham Rise	2018.1	2	30	NaN	NaN	NaN	NaN	NaN	NaN	10.3706	0.523528	0.583678	0.258111	1.19327	0.0578367	NaN	NaN	0.9222	0.250853	NaN	NaN	0.307	0.0281099	0.482975	0.0589018	NaN	NaN	NaN	NaN	NaN	NaN	NaN	NaN	NaN	NaN	NaN	NaN	NaN	NaN	NaN	NaN	0.0181971	0.00712436
Chatham Rise	2018.1	2	35	NaN	NaN	NaN	NaN	NaN	NaN	NaN	NaN	NaN	NaN	NaN	NaN	NaN	NaN	NaN	NaN	NaN	NaN	NaN	NaN	NaN	NaN	NaN	NaN	NaN	NaN	NaN	NaN	NaN	NaN	NaN	NaN	NaN	NaN	NaN	NaN	NaN	NaN	0.0108692	0.00459462
Chatham Rise	2018.1	2	40	NaN	NaN	NaN	NaN	NaN	NaN	11.238	1.09488	0.429816	0.219627	1.20875	0.0667917	NaN	NaN	1.18284	0.401829	NaN	NaN	0.393	0.0612773	0.382369	0.0338721	NaN	NaN	NaN	NaN	NaN	NaN	NaN	NaN	NaN	NaN	NaN	NaN	NaN	NaN	NaN	NaN	0.00656073	0.00299072
Chatham Rise	2018.1	2	45	NaN	NaN	NaN	NaN	NaN	NaN	NaN	NaN	NaN	NaN	NaN	NaN	NaN	NaN	NaN	NaN	NaN	NaN	NaN	NaN	NaN	NaN	NaN	NaN	NaN	NaN	NaN	NaN	NaN	NaN	NaN	NaN	NaN	NaN	NaN	NaN	NaN	NaN	0.00396217	0.00192001
Chatham Rise	2018.1	2	50	NaN	NaN	NaN	NaN	NaN	NaN	10.3099	0.523499	0.175639	0.104241	NaN	NaN	NaN	NaN	1.32811	0.282788	NaN	NaN	0.462333	0.0447002	NaN	NaN	NaN	NaN	NaN	NaN	NaN	NaN	NaN	NaN	NaN	NaN	NaN	NaN	NaN	NaN	NaN	NaN	0.00244153	0.0012528
Chatham Rise	2018.1	3	2	NaN	NaN	NaN	NaN	NaN	NaN	NaN	NaN	NaN	NaN	NaN	NaN	NaN	NaN	NaN	NaN	NaN	NaN	NaN	NaN	NaN	NaN	NaN	NaN	NaN	NaN	NaN	NaN	NaN	NaN	NaN	NaN	NaN	NaN	NaN	NaN	NaN	NaN	0.648684	0.145055
Chatham Rise	2018.1	3	5	NaN	NaN	NaN	NaN	NaN	NaN	1.99914	0.209914	0.071398	0.0171398	3.22689	0.235247	NaN	NaN	0.295531	0.0395531	NaN	NaN	1.4306	0.185373	3.78841	1.0232	NaN	NaN	NaN	NaN	NaN	NaN	NaN	NaN	NaN	NaN	NaN	NaN	NaN	NaN	NaN	NaN	0.306582	0.0511004
Chatham Rise	2018.1	3	8	NaN	NaN	NaN	NaN	NaN	NaN	NaN	NaN	NaN	NaN	NaN	NaN	NaN	NaN	NaN	NaN	NaN	NaN	NaN	NaN	NaN	NaN	NaN	NaN	NaN	NaN	NaN	NaN	NaN	NaN	NaN	NaN	NaN	NaN	NaN	NaN	NaN	NaN	0.146437	0.0269333
Chatham Rise	2018.1	3	12	NaN	NaN	NaN	NaN	NaN	NaN	1.92775	0.202775	0.071398	0.0171398	3.01273	0.362009	NaN	NaN	0.313335	0.0413335	NaN	NaN	1.20233	0.241943	3.01602	0.976815	NaN	NaN	NaN	NaN	NaN	NaN	NaN	NaN	NaN	NaN	NaN	NaN	NaN	NaN	NaN	NaN	0.0640575	0.015484
Chatham Rise	2018.1	3	20	NaN	NaN	NaN	NaN	NaN	NaN	1.92775	0.202775	0.071398	0.0171398	2.22233	0.685652	NaN	NaN	0.302653	0.0402653	NaN	NaN	1.1085	0.159312	1.05059	0.262498	NaN	NaN	NaN	NaN	NaN	NaN	NaN	NaN	NaN	NaN	NaN	NaN	NaN	NaN	NaN	NaN	0.0132149	0.00460834
Chatham Rise	2018.1	3	25	NaN	NaN	NaN	NaN	NaN	NaN	2.48108	0.168392	0.258818	0.18742	2.13798	0.223798	NaN	NaN	0.735268	0.174449	NaN	NaN	1.273	0.204212	0.644521	0.23309	NaN	NaN	NaN	NaN	NaN	NaN	NaN	NaN	NaN	NaN	NaN	NaN	NaN	NaN	NaN	NaN	0.00520943	0.00209066
Chatham Rise	2018.1	3	30	NaN	NaN	NaN	NaN	NaN	NaN	2.21334	0.285592	0.071398	0.0121197	1.25096	0.112638	NaN	NaN	0.421933	0.133523	NaN	NaN	0.966	0.11755	0.157326	0.0838819	NaN	NaN	NaN	NaN	NaN	NaN	NaN	NaN	NaN	NaN	NaN	NaN	NaN	NaN	NaN	NaN	0.00211118	0.000942839
Chatham Rise	2018.1	3	35	NaN	NaN	NaN	NaN	NaN	NaN	3.21291	0.331291	0.221334	0.0321334	0.706153	0.0806153	NaN	NaN	0.548335	0.0648335	NaN	NaN	0.442	0.0442	0.097401	0.0197401	NaN	NaN	NaN	NaN	NaN	NaN	NaN	NaN	NaN	NaN	NaN	NaN	NaN	NaN	NaN	NaN	0.000967838	0.000474572
Chatham Rise	2018.1	4	2	NaN	NaN	NaN	NaN	NaN	NaN	NaN	NaN	NaN	NaN	NaN	NaN	NaN	NaN	NaN	NaN	NaN	NaN	NaN	NaN	NaN	NaN	NaN	NaN	NaN	NaN	NaN	NaN	NaN	NaN	NaN	NaN	NaN	NaN	NaN	NaN	NaN	NaN	0.522849	0.10673
Chatham Rise	2018.1	4	5	NaN	NaN	NaN	NaN	NaN	NaN	2.30853	0.481312	0.176115	0.104717	1.83257	0.086427	NaN	NaN	0.0854549	0.0142425	NaN	NaN	0.7815	0.039075	1.61901	0.113109	NaN	NaN	NaN	NaN	NaN	NaN	NaN	NaN	NaN	NaN	NaN	NaN	NaN	NaN	NaN	NaN	0.31091	0.0522556
Chatham Rise	2018.1	4	8	NaN	NaN	NaN	NaN	NaN	NaN	NaN	NaN	NaN	NaN	NaN	NaN	NaN	NaN	NaN	NaN	NaN	NaN	NaN	NaN	NaN	NaN	NaN	NaN	NaN	NaN	NaN	NaN	NaN	NaN	NaN	NaN	NaN	NaN	NaN	NaN	NaN	NaN	0.174868	0.0371557
Chatham Rise	2018.1	4	12	NaN	NaN	NaN	NaN	NaN	NaN	2.76072	0.211533	0.211814	0.0922051	1.91734	0.129763	NaN	NaN	0.0783336	0.0102961	NaN	NaN	0.7542	0.110562	1.3397	0.129908	NaN	NaN	NaN	NaN	NaN	NaN	NaN	NaN	NaN	NaN	NaN	NaN	NaN	NaN	NaN	NaN	0.0864946	0.0227413
Chatham Rise	2018.1	4	20	NaN	NaN	NaN	NaN	NaN	NaN	2.64172	0.359362	0.199914	0.0741989	1.72311	0.1211	NaN	NaN	0.0902024	0.01899	NaN	NaN	0.843333	0.198153	0.867883	0.148161	NaN	NaN	NaN	NaN	NaN	NaN	NaN	NaN	NaN	NaN	NaN	NaN	NaN	NaN	NaN	NaN	0.0224283	0.00725569
Chatham Rise	2018.1	4	25	NaN	NaN	NaN	NaN	NaN	NaN	3.14151	0.187149	0.326051	0.0596409	NaN	NaN	NaN	NaN	0.293158	0.221945	NaN	NaN	0.483667	0.0458597	NaN	NaN	NaN	NaN	NaN	NaN	NaN	NaN	NaN	NaN	NaN	NaN	NaN	NaN	NaN	NaN	NaN	NaN	0.0100987	0.00357085
Chatham Rise	2018.1	4	30	NaN	NaN	NaN	NaN	NaN	NaN	3.07011	0.288551	0.36651	0.0620154	1.55897	0.160741	NaN	NaN	0.0925761	0.0213637	NaN	NaN	0.6798	0.0833903	0.428216	0.159746	NaN	NaN	NaN	NaN	NaN	NaN	NaN	NaN	NaN	NaN	NaN	NaN	NaN	NaN	NaN	NaN	0.00492291	0.00191953
Chatham Rise	2018.1	4	35	NaN	NaN	NaN	NaN	NaN	NaN	NaN	NaN	NaN	NaN	NaN	NaN	NaN	NaN	NaN	NaN	NaN	NaN	NaN	NaN	NaN	NaN	NaN	NaN	NaN	NaN	NaN	NaN	NaN	NaN	NaN	NaN	NaN	NaN	NaN	NaN	NaN	NaN	0.00227388	0.000949057
Chatham Rise	2018.1	4	40	NaN	NaN	NaN	NaN	NaN	NaN	3.34381	0.140593	0.518825	0.0375849	1.10054	0.191392	NaN	NaN	0.296659	0.209298	NaN	NaN	0.473571	0.0668975	0.146778	0.0623445	NaN	NaN	NaN	NaN	NaN	NaN	NaN	NaN	NaN	NaN	NaN	NaN	NaN	NaN	NaN	NaN	0.0010642	0.000473059
Chatham Rise	2018.1	4	45	NaN	NaN	NaN	NaN	NaN	NaN	NaN	NaN	NaN	NaN	NaN	NaN	NaN	NaN	NaN	NaN	NaN	NaN	NaN	NaN	NaN	NaN	NaN	NaN	NaN	NaN	NaN	NaN	NaN	NaN	NaN	NaN	NaN	NaN	NaN	NaN	NaN	NaN	0.000503748	0.000237738
Chatham Rise	2018.1	5	2	NaN	NaN	NaN	NaN	NaN	NaN	NaN	NaN	NaN	NaN	NaN	NaN	NaN	NaN	NaN	NaN	NaN	NaN	NaN	NaN	NaN	NaN	NaN	NaN	NaN	NaN	NaN	NaN	NaN	NaN	NaN	NaN	NaN	NaN	NaN	NaN	NaN	NaN	0.65575	0.133858
Chatham Rise	2018.1	5	5	NaN	NaN	NaN	NaN	NaN	NaN	9.71012	0.566388	0.071398	0.00989567	0.81736	0.0771809	NaN	NaN	0.6872	0.045449	NaN	NaN	0.1846	0.0185489	0.446622	0.0466399	NaN	NaN	NaN	NaN	NaN	NaN	NaN	NaN	NaN	NaN	NaN	NaN	NaN	NaN	NaN	NaN	0.420102	0.0700203
Chatham Rise	2018.1	5	8	NaN	NaN	NaN	NaN	NaN	NaN	NaN	NaN	NaN	NaN	NaN	NaN	NaN	NaN	NaN	NaN	NaN	NaN	NaN	NaN	NaN	NaN	NaN	NaN	NaN	NaN	NaN	NaN	NaN	NaN	NaN	NaN	NaN	NaN	NaN	NaN	NaN	NaN	0.271136	0.0561361
Chatham Rise	2018.1	5	12	NaN	NaN	NaN	NaN	NaN	NaN	9.73392	0.567762	0.071398	0.00989567	0.919115	0.10995	NaN	NaN	0.710937	0.0468195	NaN	NaN	0.206	0.0443152	0.402276	0.0370511	NaN	NaN	NaN	NaN	NaN	NaN	NaN	NaN	NaN	NaN	NaN	NaN	NaN	NaN	NaN	NaN	0.165325	0.0440253
Chatham Rise	2018.1	5	20	NaN	NaN	NaN	NaN	NaN	NaN	NaN	NaN	NaN	NaN	NaN	NaN	NaN	NaN	NaN	NaN	NaN	NaN	NaN	NaN	NaN	NaN	NaN	NaN	NaN	NaN	NaN	NaN	NaN	NaN	NaN	NaN	NaN	NaN	NaN	NaN	NaN	NaN	0.0630294	0.0212262
Chatham Rise	2018.1	5	25	NaN	NaN	NaN	NaN	NaN	NaN	9.69584	0.438083	0.071398	0.00766515	0.733579	0.058943	NaN	NaN	1.02831	0.106714	NaN	NaN	0.1178	0.0124876	0.280939	0.0571048	NaN	NaN	NaN	NaN	NaN	NaN	NaN	NaN	NaN	NaN	NaN	NaN	NaN	NaN	NaN	NaN	0.0363762	0.0132186
Chatham Rise	2018.1	5	30	NaN	NaN	NaN	NaN	NaN	NaN	9.85292	0.995292	0.071398	0.0171398	0.898734	0.0706211	NaN	NaN	0.74773	0.084773	NaN	NaN	0.2975	0.1045	0.309563	0.0409563	NaN	NaN	NaN	NaN	NaN	NaN	NaN	NaN	NaN	NaN	NaN	NaN	NaN	NaN	NaN	NaN	0.0213637	0.00829667
Chatham Rise	2018.1	5	35	NaN	NaN	NaN	NaN	NaN	NaN	NaN	NaN	NaN	NaN	NaN	NaN	NaN	NaN	NaN	NaN	NaN	NaN	NaN	NaN	NaN	NaN	NaN	NaN	NaN	NaN	NaN	NaN	NaN	NaN	NaN	NaN	NaN	NaN	NaN	NaN	NaN	NaN	0.0126449	0.00520084
Chatham Rise	2018.1	5	40	NaN	NaN	NaN	NaN	NaN	NaN	NaN	NaN	NaN	NaN	NaN	NaN	NaN	NaN	NaN	NaN	NaN	NaN	NaN	NaN	NaN	NaN	NaN	NaN	NaN	NaN	NaN	NaN	NaN	NaN	NaN	NaN	NaN	NaN	NaN	NaN	NaN	NaN	0.00753021	0.00327966
Chatham Rise	2018.1	5	45	NaN	NaN	NaN	NaN	NaN	NaN	9.88862	0.706302	0.071398	0.0121197	1.2874	0.13874	NaN	NaN	0.742389	0.0595659	NaN	NaN	0.1615	0.0355	0.209854	0.0380887	NaN	NaN	NaN	NaN	NaN	NaN	NaN	NaN	NaN	NaN	NaN	NaN	NaN	NaN	NaN	NaN	0.00451892	0.00207432
Chatham Rise	2018.1	5	50	NaN	NaN	NaN	NaN	NaN	NaN	9.56733	0.542969	0.071398	0.0085699	1.03507	0.157049	NaN	NaN	0.890155	0.273821	NaN	NaN	0.2664	0.0780721	0.325812	0.0425812	NaN	NaN	NaN	NaN	NaN	NaN	NaN	NaN	NaN	NaN	NaN	NaN	NaN	NaN	NaN	NaN	0.00272505	0.00131814
Chatham Rise	2018.1	5	55	NaN	NaN	NaN	NaN	NaN	NaN	NaN	NaN	NaN	NaN	NaN	NaN	NaN	NaN	NaN	NaN	NaN	NaN	NaN	NaN	NaN	NaN	NaN	NaN	NaN	NaN	NaN	NaN	NaN	NaN	NaN	NaN	NaN	NaN	NaN	NaN	NaN	NaN	0.00166135	0.000841953
Chatham Rise	2018.1	5	60	NaN	NaN	NaN	NaN	NaN	NaN	8.49636	0.859636	0.071398	0.0171398	0.845501	0.066857	NaN	NaN	0.237137	0.0337137	NaN	NaN	0.4315	0.0305117	0.0754122	0.0175412	NaN	NaN	NaN	NaN	NaN	NaN	NaN	NaN	NaN	NaN	NaN	NaN	NaN	NaN	NaN	NaN	0.00100516	0.000533021
