# Supplementary material for: Quantifying biological carbon pump pathways with a data-constrained mechanistic model ensemble approach
Source: Copernicus journal article supplement (doi:10.5194/bg-2022-7), 2022-02-07
Supplement: Supplementary file 3 [file Supp Table 3.xlsx]

## Sheet: Sheet1
Region	Cruise	Cycle	<1-mm mesozooplankton biomass (epipelagic resident)	uncertainty	>1-mm mesozooplankton biomass (epipelagic resident)	uncertainty	<1-mm mesozooplankton biomass (dvm)	uncertainty	>1-mm mesozooplankton biomass (dvm)	uncertainty	<1-mm mesozooplankton grazing (daytime)	uncertainty	>1-mm mesozooplankton grazing (daytime)	uncertainty	<1-mm mesozooplankton grazing (nighttime)	uncertainty	>1-mm mesozooplankton grazing (nighttime)	uncertainty
			mg dry weight / m2	mg dry weight / m2	mg dry weight / m2	mg dry weight / m2	mg dry weight / m2	mg dry weight / m2	mg dry weight / m2	'mg dry weight / m2'	mg Chl a m-2 d-1	mg Chl a m-2 d-1	mg Chl a m-2 d-1	mg Chl a m-2 d-1	mg Chl a m-2 d-1	mg Chl a m-2 d-1	mg Chl a m-2 d-1	mg Chl a m-2 d-1
California Current Ecosystem	605	1	1370.86	525.891	2360.6	2708.55	43.4219	20.8194	17.982	24.9149	17.0998	17.4359	5.77402	8.04956	7.6475	10.0266	4.78405	3.05111
California Current Ecosystem	605	2	626.238	220.962	159.613	61.3581	139.18	61.4034	462.127	209.197	1.07993	0.606867	0.0274444	0.0299201	1.57576	0.76204	0.248808	0.131474
California Current Ecosystem	605	3	697.164	316.047	22.9273	35.6202	1483.68	1350.32	655.433	1266.18	5.35659	12.1573	0.0494128	0.048831	7.00953	9.85868	0.920078	0.640341
California Current Ecosystem	605	4	1175.54	505.112	264.884	174.554	989.462	1021.44	661.814	645.503	1.4456	0.519308	0.245168	0.158536	3.5153	2.77703	0.635561	0.408218
California Current Ecosystem	605	5	204.62	105.158	94.2884	32.8166	320.763	187.513	562.227	263.198	0.196637	0.129045	0.0147182	0.0080292	0.431709	0.250903	0.115332	0.0603891
California Current Ecosystem	704	1	4228.05	2886.92	546.621	297.803	-1444.45	-1793.58	5502.07	3009.78	31.8186	24.0214	1.31645	1.93026	27.3769	15.1709	5.2563	4.08303
California Current Ecosystem	704	2	413.953	149.023	156.499	37.4632	202.858	99.7919	661.036	199.437	0.743772	0.355538	0.254764	0.173774	0.910235	0.49265	0.313285	0.120911
California Current Ecosystem	704	4	2165.23	627.22	925.06	923.206	142.059	65.081	2189.5	2362.65	7.59726	9.10219	1.09174	0.75547	4.26922	2.1305	1.24919	0.374504
California Current Ecosystem	810	1	380.876	326.833	615.99	583.706	600.11	734.594	920.476	1373.94	0.764485	0.577951	0.628541	0.959993	2.76495	5.61532	0.714388	0.744075
California Current Ecosystem	810	2	505.203	200.6	450.244	166.652	445.186	235.889	590.354	263.865	1.39416	0.642253	0.218442	0.224415	2.12648	1.05837	0.427007	0.427422
California Current Ecosystem	810	3	883.108	586.915	825.394	1193.4	892.673	1681.95	970.044	2711.1	2.49325	5.80135	0.822539	2.92642	3.73291	17.9265	0.478134	2.83688
California Current Ecosystem	810	4	498.293	3159.67	476.19	1517.66	NaN	NaN	NaN	NaN	3.91161	37.8229	0.215166	0.447404	NaN	NaN	NaN	NaN
California Current Ecosystem	810	5	4.21969	NaN	2.04358	NaN	3.64111	NaN	13.1276	NaN	NaN	NaN	NaN	NaN	NaN	NaN	NaN	NaN
California Current Ecosystem	810	6	3.52789	NaN	2.56738	NaN	0.0727475	NaN	5.59826	NaN	NaN	NaN	NaN	NaN	NaN	NaN	NaN	NaN
California Current Ecosystem	1106	1	865.074	1831.46	2460.06	18157.5	-41.3875	-148.517	1392.39	10313	0.480717	1.10111	0.496371	2.6979	0.721517	0.875735	2.51616	2.38228
California Current Ecosystem	1106	2	213.004	NaN	283.184	NaN	-7.92478	NaN	557.314	NaN	0.0185892	NaN	0.0186759	NaN	0.0461824	0.226674	0.113692	0.393721
California Current Ecosystem	1106	3	921.286	1256.52	3451.86	15389.5	-64.5887	NaN	2398.47	NaN	0.259236	0.302309	0.791174	5.53727	0.359183	1.16092	2.69266	9.2094
California Current Ecosystem	1106	4	1048.92	915.01	1725.35	1726.73	18.551	102.421	2330.21	7516.34	1.02166	1.57324	1.32779	8.68555	1.09332	1.57324	0.939916	8.68555
California Current Ecosystem	1106	5	633.923	2611.85	838	2659.5	21.9806	90.7798	155.519	627.108	0.195001	0.584239	0.0587321	0.220514	0.265521	0.340969	0.149786	0.369457
California Current Ecosystem	1106	6	1665.39	884.282	2778.7	4076.4	512.852	1405.17	4181.1	12595.4	0.436954	0.556041	0.226966	0.211764	0.983219	4.14066	1.0852	9.0758
California Current Ecosystem	1208	1	2233.62	2914.02	3167.04	1903.43	1010.12	2062.25	6750.58	9858.15	2.66638	0.87471	3.67571	2.83417	2.4786	3.02741	3.76129	3.90058
California Current Ecosystem	1208	2	544.765	2296.1	1498.65	13191.1	374.102	1654.9	1323.6	11907.5	0.281074	1.24313	0.579421	4.19069	0.660292	0.517554	1.13705	4.22433
California Current Ecosystem	1208	3	720.839	152.052	2788.03	2150.78	1181.04	1799.67	2921.1	5465.31	0.495761	0.703629	0.756864	1.12244	1.08812	0.863783	3.33567	20.9321
California Current Ecosystem	1208	4	502.198	2586.61	399.807	582.085	216.416	1167.76	677.438	1336.76	1.11709	3.93029	0.121776	0.101046	1.52181	6.3965	0.751816	1.21096
California Current Ecosystem	1208	5	1543.17	NaN	536.222	NaN	-210.965	NaN	2047.17	NaN	2.12373	NaN	0.683867	NaN	1.94781	NaN	0.71779	NaN
California Current Ecosystem	1408	1	1191.81	821.336	1817.3	1891.6	81.5889	67.9973	3148.21	5277.69	2.92144	5.87689	1.38054	1.33956	2.62997	2.42163	3.17249	4.31593
California Current Ecosystem	1408	2	1149.58	781.97	4397.85	4778.2	64.2202	52.0123	984.954	1188.13	1.94557	1.38373	2.88745	1.36345	2.41795	1.21399	3.22138	5.01749
California Current Ecosystem	1408	3	403.946	NaN	6596.12	1701.12	351.401	NaN	-4116.15	-3841.07	NaN	NaN	6.39245	1.89769	1.03541	0.851316	1.01517	0.791176
California Current Ecosystem	1408	4	331.979	145.712	782.337	1116.83	52.0401	25.4911	1283.99	2476.74	0.159533	0.158282	0.223632	0.339586	0.427364	0.22665	0.347505	0.280306
California Current Ecosystem	1408	5	311.972	95.7261	353.56	359.516	0.686637	0.449323	1596.21	2207.09	0.246119	0.10111	0.324553	0.486246	0.246119	0.10111	0.324553	0.486246
California Current Ecosystem	1604	1	543.679	NaN	296.321	NaN	189.362	NaN	981.021	NaN	0.336184	NaN	0.177105	NaN	0.530589	NaN	0.332724	NaN
California Current Ecosystem	1604	2	65.5282	22.5386	440.984	135.012	55.4679	40.1493	229.53	169.275	0.0686981	0.0766162	0.0734946	0.0680223	0.0894852	0.0704851	0.220855	0.217532
California Current Ecosystem	1604	3	681.078	NaN	1664.93	NaN	1275.18	NaN	2731.29	NaN	3.64514	NaN	0.966617	NaN	3.75354	0.986264	2.41037	7.90701
California Current Ecosystem	1604	4	5791.97	NaN	16777.8	NaN	-3394.34	NaN	-8449.23	NaN	2.98879	NaN	6.95253	NaN	2.05716	NaN	4.97917	NaN
Costa Rica Dome	2010.06	1	2856.67	375.692	1936.67	512.196	-274.167	548.726	1000.83	621.531	2.93416	1.00281	0.42624	0.11793	3.49673	1.29007	0.65742	0.141568
Costa Rica Dome	2010.06	2	1567.5	185.129	1550	274.773	792.5	242.802	2900	363.689	0.97068	0.193777	0.48042	0.144508	1.31473	0.243514	0.700482	0.188371
Costa Rica Dome	2010.06	3	2305	500.108	1602.5	336.387	615	809.171	2375	1069.99	2.61264	0.608957	3.16014	0.665008	3.92448	0.980724	3.60708	0.971822
Costa Rica Dome	2010.06	4	1945	365.297	1272.5	199.932	973	395.709	3299.5	586.615	1.7523	0.222078	0.94092	0.230913	1.93318	0.265825	1.28845	0.355593
Costa Rica Dome	2010.06	5	2160	154.272	1715	649.622	1020	275.953	1179	831.146	3.59724	0.681528	1.55886	0.130385	4.48088	0.805404	2.59505	0.50202
Gulf of Mexico	2017.05	1	271.932	68.6336	209.816	44.4297	-25.7498	56.4222	146.71	24.2216	0.20222	0.0519165	0.0747512	0.0294283	0.184799	0.0354724	0.140115	0.033326
Gulf of Mexico	2017.05	2	109.765	24.9859	156.008	49.3642	45.5416	31.8407	452.671	66.3106	0.0731018	0.0117462	0.031257	0.0235641	0.104359	0.011111	0.224991	0.0953229
Gulf of Mexico	2017.05	3	167.485	15.3552	180.293	8.78703	-12.2901	36.8257	26.7774	285.27	0.231785	0.0304323	0.0953377	0.00895259	0.20439	0.03853	0.270433	0.0477239
Gulf of Mexico	2018.05	4	393.342	108.549	460.117	118.01	-78.8443	89.2099	495.293	250.368	0.138961	0.0250018	0.0858273	0.0205647	0.158594	0.0229536	0.129808	0.0181589
Gulf of Mexico	2018.05	5	509.568	179.845	845.5	119.47	96.0874	143.725	748.241	209.203	0.274935	0.0725037	0.326385	0.0612349	0.497979	0.119394	0.505915	0.0967431
Chatham Rise	2018.1	1	NaN	NaN	NaN	NaN	NaN	NaN	NaN	NaN	NaN	NaN	NaN	NaN	NaN	NaN	NaN	NaN
Chatham Rise	2018.1	2	NaN	NaN	NaN	NaN	NaN	NaN	NaN	NaN	NaN	NaN	NaN	NaN	NaN	NaN	NaN	NaN
Chatham Rise	2018.1	3	NaN	NaN	NaN	NaN	NaN	NaN	NaN	NaN	NaN	NaN	NaN	NaN	NaN	NaN	NaN	NaN
Chatham Rise	2018.1	4	NaN	NaN	NaN	NaN	NaN	NaN	NaN	NaN	NaN	NaN	NaN	NaN	NaN	NaN	NaN	NaN
Chatham Rise	2018.1	5	NaN	NaN	NaN	NaN	NaN	NaN	NaN	NaN	NaN	NaN	NaN	NaN	NaN	NaN	NaN	NaN
