# Supplementary material for: Quantifying biological carbon pump pathways with a data-constrained mechanistic model ensemble approach
Source: Copernicus journal article supplement (doi:10.5194/bg-2022-7), 2022-02-07
Supplement: Supplementary file 4 [file Supp Table 4.xlsx]

## Sheet: Sheet1
Region	Cruise	Lagrangian Experiment	Depth	Sinking Nitrogen Flux	uncertainty	Sinking Biogenic Silica Flux	uncertainty
			m	mmol N m-2	mmol N m-2	mmol Si m-2	mmol Si m-2
California Current Ecosystem	810	1	52.5	0.966587	0.233023	NaN	NaN
California Current Ecosystem	810	3	65	1.04115	0.117846	NaN	NaN
California Current Ecosystem	810	6	65	0.754637	0.101304	NaN	NaN
California Current Ecosystem	1106	2	105	0.479121	0.0853971	0.137925	0.0656981
California Current Ecosystem	1106	3	65	3.10614	0.32095	18.237	1.11065
California Current Ecosystem	1106	5	105	0.685941	0.0973379	0.246294	0.0719548
California Current Ecosystem	1106	6	65	2.70442	0.213875	3.91007	0.283483
California Current Ecosystem	1208	2	75	1.61671	0.151076	0.405382	0.0811398
California Current Ecosystem	1208	4	105	1.96733	0.171319	0.827549	0.11
California Current Ecosystem	1208	5	75	4.77586	0.33347	NaN	NaN
California Current Ecosystem	1408	3	65	1.17796	0.238806	2.08862	0.178322
California Current Ecosystem	1408	4	75	0.506253	0.0869635	0.31481	0.0759106
California Current Ecosystem	1408	4	105	0.362173	0.0786451	0.351189	0.0780109
California Current Ecosystem	1408	5	105	0.376664	0.0794817	0.349791	0.0779302
California Current Ecosystem	1408	5	115	0.303964	0.0752844	NaN	NaN
California Current Ecosystem	1604	1	105	0.845694	0.151616	0.264761	0.073021
California Current Ecosystem	1604	2	105	0.485263	0.0857517	0.613806	0.41
California Current Ecosystem	1604	3	57.5	1.54739	0.147074	1.14085	0.157963
Costa Rica Dome	2010.06	1	65	0.978784	0.114245	5.72456	0.388243
Costa Rica Dome	2010.06	2	65	0.556867	0.0898858	3.05075	1.045
Costa Rica Dome	2010.06	3	75	0.619208	0.093485	1.70206	0.438786
Costa Rica Dome	2010.06	4	75	0.451004	0.0837738	1.30882	0.21362
Costa Rica Dome	2010.06	5	85	0.691631	0.0976664	1.25731	0.130326
Gulf of Mexico	2017.05	1	65	1.41552	0.316947	NaN	NaN
Gulf of Mexico	2017.05	2	65	0.79774	0.103793	NaN	NaN
Gulf of Mexico	2017.05	3	65	0.989279	0.14911	NaN	NaN
Gulf of Mexico	2017.05	3	145	1.07711	0.119922	NaN	NaN
Gulf of Mexico	2018.05	4	65	0.579681	0.0912029	NaN	NaN
Gulf of Mexico	2018.05	5	65	1.05885	0.118868	NaN	NaN
Gulf of Mexico	2018.05	5	125	0.812166	0.106805	NaN	NaN
Chatham Rise	2018.1	1	52.5	1.05489	0.163567	NaN	NaN
Chatham Rise	2018.1	2	52.5	1.93752	0.169598	NaN	NaN
Chatham Rise	2018.1	3	37.5	0.396365	0.0806192	NaN	NaN
Chatham Rise	2018.1	4	47.5	2.61859	0.344017	NaN	NaN
Chatham Rise	2018.1	5	65	1.23741	0.129177	NaN	NaN
