# Supplementary material for: Quantifying biological carbon pump pathways with a data-constrained mechanistic model ensemble approach
Source: Copernicus journal article supplement (doi:10.5194/bg-2022-7), 2022-02-07
Supplement: Supplementary file 5 [file Supp Table 5.xlsx]

## Sheet: Sheet1
Parameter Name	1	2	3	4	5	6	7	8	9	10	11	12	13	14	15	16	17	18	19	20	21	22	23	24	25	26	27	28	29	30	31	32	33	34	35	36	37	38	39	40	41	42	43	44	45	46	47	48	49
TLIM	0.0693	0.0693	0.0693	0.0693	0.0693	0.0693	0.0693	0.0693	0.0693	0.0693	0.0693	0.0693	0.0693	0.0693	0.0693	0.0693	0.0693	0.0693	0.0693	0.0693	0.0693	0.0693	0.0693	0.0693	0.0693	0.0693	0.0693	0.0693	0.0693	0.0693	0.0693	0.0693	0.0693	0.0693	0.0693	0.0693	0.0693	0.0693	0.0693	0.0693	0.0693	0.0693	0.0693	0.0693	0.0693	0.0693	0.0693	0.0693	0.0693
Vmax,SP	0.494643	0.428882	0.393361	0.290583	0.349754	0.254046	0.396124	0.451953	0.368771	0.32752	0.317641	0.31849	0.294112	0.284719	0.252677	0.373265	0.312712	0.392222	0.284046	0.260329	0.289917	0.19933	0.252196	0.287468	0.211465	0.210202	0.271134	0.242443	0.25126	0.309223	0.247196	0.281579	0.267187	0.228021	0.307051	0.294655	0.302954	0.286134	0.221424	0.221169	0.280324	0.387081	0.289939	0.260351	0.287806	0.264171	0.268226	0.269257	0.28304
kNO,SP	0.542753	0.259508	0.297282	0.257033	0.230111	0.257553	0.277871	0.164676	0.194604	0.087764	0.0653334	0.0793413	0.0313906	0.0425007	0.0469508	0.0412615	0.0854265	0.0993722	0.0544709	0.0679075	0.0715585	0.0858423	0.0901612	0.0341456	0.0279325	0.0311323	0.037447	0.0232565	0.0227042	0.0288126	0.0218398	0.0162928	0.0226309	0.0238094	0.0167892	0.015156	0.0146114	0.0131072	0.0153429	0.0151047	0.0157418	0.0176827	0.0270058	0.0261328	0.0304118	0.0430506	0.0338426	0.0137805	0.0104729
kNH,SP	0.00131881	0.00142012	0.00137684	0.00129972	0.00130044	0.001387	0.00128981	0.00125196	0.00149955	0.00145877	0.00154987	0.00162711	0.0015677	0.0016341	0.00157778	0.00155598	0.00149471	0.00140414	0.00148613	0.00140316	0.00168329	0.00151291	0.00144673	0.00130927	0.00131678	0.00140951	0.00152839	0.00174617	0.00187884	0.00174457	0.00194218	0.00176724	0.00173638	0.00163925	0.00169988	0.00140154	0.00150459	0.00164657	0.00171991	0.00164215	0.00166588	0.00172747	0.00153568	0.00208224	0.00261576	0.00233341	0.00236117	0.00210283	0.00198449
αSP	0.0199288	0.0184724	0.0173225	0.0199804	0.0152951	0.0178023	0.0173504	0.0164678	0.0155666	0.0166545	0.018305	0.0170925	0.016386	0.0155253	0.0192175	0.0188222	0.0183966	0.0192983	0.0156184	0.014976	0.0141829	0.0166151	0.0193656	0.0190671	0.0176769	0.0196033	0.0165085	0.0197559	0.0194604	0.0198037	0.0165886	0.0186216	0.019895	0.0190185	0.0175293	0.0182956	0.0198173	0.0185024	0.0174971	0.0148829	0.0184432	0.0164587	0.0198306	0.017065	0.0195918	0.015064	0.0182557	0.0169174	0.0167508
βSP	0.000755631	0.000745505	0.000530585	0.000312393	0.000185574	0.000201336	0.000555514	0.000261352	7.73701e-05	8.96007e-05	6.1415e-05	2.59134e-05	3.79114e-05	5.72054e-05	8.49829e-05	4.26261e-05	2.32684e-05	3.67503e-05	5.56788e-05	2.82362e-05	1.28394e-05	1.84687e-05	1.11861e-05	1.25556e-05	1.71585e-05	1.18612e-05	1.03926e-05	2.68217e-05	2.46015e-05	1.42057e-05	2.48369e-05	4.90001e-05	0.000158777	0.000130741	9.70054e-05	9.95825e-05	0.000141817	0.000126774	0.000151098	5.09712e-05	3.19549e-05	2.477e-05	1.63527e-05	2.15704e-05	2.4801e-05	4.26284e-05	4.46951e-05	5.745e-05	5.97204e-05
ResSP	0.00434882	0.00449003	0.0142705	0.0172946	0.0216997	0.0218639	0.00035627	0.00381936	0.000127806	0.00636808	0.000408004	0.00400503	0.00155189	0.00182442	5.52977e-06	5.60361e-05	0.000572653	0.00328013	0.000693368	0.00342296	0.00075553	0.0012158	0.00610628	0.00249696	0.00495732	0.000480807	0.000397371	0.00197111	0.00158382	0.00154711	0.00265384	0.00678932	0.00172588	0.00661147	0.0113149	0.00315316	0.00174781	0.00981349	0.00026132	0.00658858	0.000431393	0.00154443	0.00324116	0.00208961	0.000847746	0.0025519	0.0076295	0.0103383	0.00249517
MortSP	0.0147519	0.0182477	0.00250288	0.00630818	0.0123324	0.00141245	0.00590654	0.00439032	0.00468623	0.0147531	0.0207495	0.0214343	0.0123335	0.0313854	0.0311265	0.0286127	0.0357665	0.0284977	0.0311695	0.0370945	0.023452	0.0101466	0.0040696	0.00658091	0.00158724	0.00701801	0.0148474	0.0201215	0.0135663	0.0107672	0.0174469	0.00461335	0.00908958	0.00443154	0.00445552	0.0026426	0.00675335	0.00939268	0.00728558	0.0124784	0.040296	0.0299903	0.0239546	0.0135776	0.0096867	0.0111211	0.00485965	0.0049117	0.00775032
ExcSP	0.273922	0.297002	0.234827	0.255254	0.191189	0.202588	0.218594	0.264836	0.281621	0.291707	0.264705	0.277666	0.271146	0.290698	0.299537	0.269153	0.256537	0.293523	0.289959	0.283673	0.289325	0.298031	0.298648	0.294598	0.291837	0.292969	0.286077	0.267094	0.291986	0.276966	0.288036	0.287098	0.299228	0.28191	0.28347	0.271517	0.295435	0.27887	0.279766	0.255468	0.292148	0.284976	0.290914	0.291783	0.251584	0.275274	0.281235	0.27577	0.285658
InhNH,NO,SP	0.0931621	0.0262474	0.00493031	0.036194	0.0256954	0.0153527	0.167269	0.0429774	0.00975876	0.0315006	0.0564242	0.0877787	0.0182058	0.0203369	0.0497016	0.147834	0.0437714	0.0272663	0.00319951	0.00542457	0.0854548	0.0356221	0.051699	0.0594566	0.0141964	0.0289533	0.001691	0.00770756	0.0500023	0.0525598	0.0250606	0.065009	0.00396033	0.0200102	0.00176189	0.00682763	0.00277358	0.0240314	0.0974033	0.00903074	0.0676714	0.0133629	0.0140294	0.00561348	0.0110315	0.00775216	0.00632875	0.0306055	0.00735454
Vmax,LP	0.72959	0.826291	0.820381	0.839275	0.727935	0.743955	0.824085	0.842715	0.856146	0.810417	0.840729	0.780769	0.683837	0.668079	0.619613	0.627232	0.620379	0.659542	0.597313	0.497333	0.418743	0.360743	0.43835	0.534782	0.447684	0.402856	0.499343	0.483086	0.512009	0.604265	0.55093	0.657712	0.616078	0.594868	0.60876	0.49327	0.613603	0.602112	0.557876	0.619626	0.574878	0.518435	0.586915	0.693332	0.674643	0.599587	0.559426	0.634205	0.694893
kNO,LP	0.855284	0.881061	1.1392	1.09497	0.751623	0.638782	0.555434	0.205084	0.230763	0.254264	0.245649	0.429295	0.43815	0.382865	0.55227	0.267573	0.173057	0.119984	0.181736	0.105136	0.0958669	0.241717	0.270126	0.533292	0.742047	0.652956	0.504553	0.443259	0.389951	0.388051	0.241508	0.215249	0.209113	0.109275	0.183394	0.148947	0.123871	0.103056	0.178982	0.223123	0.204583	0.384492	0.392973	0.347497	1.29236	1.32261	3.33126	2.3736	9.21431
kNH,LP	0.00147524	0.00147209	0.00147831	0.00133252	0.00138411	0.00156095	0.00178866	0.00150453	0.00244209	0.00166868	0.00219852	0.00252397	0.00343341	0.00228	0.00255302	0.00170089	0.00153309	0.00182386	0.00186203	0.00210824	0.00258484	0.00172393	0.00155197	0.00175321	0.00216353	0.0020553	0.00163394	0.0034452	0.00254478	0.00262477	0.00234482	0.00217008	0.00191194	0.00265018	0.00337822	0.00165429	0.00228641	0.00195855	0.00171667	0.00207631	0.00171611	0.00222844	0.00555007	0.00426363	0.00351875	0.002631	0.00248404	0.00223985	0.00301272
kSI,LP	0.109714	0.134209	0.156891	0.146765	0.107866	0.119332	0.137016	0.104666	0.115717	0.139384	0.144793	0.132878	0.246958	0.146301	0.12173	0.134538	0.101484	0.140479	0.199536	0.13289	0.109092	0.104491	0.116455	0.251112	0.276564	0.106858	0.133608	0.162458	0.180993	0.179306	0.166497	0.173079	0.185889	0.164769	0.141282	0.152034	0.108107	0.238344	0.125614	0.232546	0.222374	0.138281	0.204561	0.198691	0.13937	0.226399	0.1711	0.217091	0.147532
αLP	0.0145313	0.0135734	0.0148814	0.0108266	0.00963374	0.00815985	0.00728002	0.0109808	0.0150815	0.0146569	0.0173002	0.0135244	0.0121876	0.011216	0.00897795	0.0128775	0.0116866	0.0132498	0.0186897	0.0113559	0.0109671	0.0122243	0.0171222	0.0116135	0.00930372	0.0115693	0.00935753	0.0116404	0.0115492	0.0156743	0.0138787	0.00959067	0.0099867	0.00593996	0.00682915	0.00998598	0.00898028	0.0104691	0.00768841	0.006851	0.00768666	0.00913977	0.00799951	0.00772098	0.00658293	0.0121029	0.00678447	0.00855598	0.00784576
βLP	0.000960277	0.000734298	0.000426934	0.000528072	0.000628801	0.000840967	0.00093742	0.000718604	0.000703232	0.000848753	0.000622984	0.000823584	0.000524136	0.000644948	0.000580637	0.000434223	0.000210892	0.000307162	0.000301181	0.000296528	0.00024563	0.000265583	0.000197027	0.000178984	0.000413391	0.000576757	0.000574019	0.000694245	0.000852156	0.000896582	0.00074992	0.000773825	0.000509051	0.000438724	0.00054807	0.000523875	0.000521861	0.000761149	0.000741233	0.000581031	0.000796034	0.000607366	0.000589629	0.000831381	0.000872281	0.000682335	0.000741858	0.000574985	0.000613426
ResLP	0.0157091	0.0127351	0.0188062	0.0152643	0.0193586	0.0136487	0.0151508	0.0180522	0.0250488	0.0330091	0.0286388	0.0254672	0.0307843	0.0315368	0.0268618	0.02796	0.0376945	0.0329113	0.049817	0.0588793	0.0399031	0.0267329	0.025694	0.0205369	0.0147314	0.0131236	0.021722	0.0218771	0.0194669	0.0195635	0.0135621	0.0199485	0.0185948	0.0173349	0.0138999	0.0135995	0.012246	0.0115987	0.0131776	0.0125335	0.0116872	0.0137179	0.0134086	0.0104799	0.0115448	0.0140458	0.0134447	0.015866	0.0155081
MortLP	0.00223868	0.00185444	0.00189952	0.000985254	0.00213481	0.00671055	0.00377489	0.00222538	0.0015951	0.000849276	0.000845652	0.00059918	0.00118934	0.00100076	0.00142361	0.00150951	0.00121741	0.00109354	0.000820819	0.00119017	0.00138031	0.00253042	0.00359089	0.00146279	0.00180854	0.000532416	0.000624547	0.00106232	0.000664988	0.000562381	0.000521377	0.00117086	0.0010401	0.00108385	0.0017189	0.00179658	0.00276847	0.00586264	0.00253445	0.00124602	0.001166	0.000614235	0.00162972	0.00101953	0.00101067	0.000613559	0.000556579	0.00183004	0.00386277
ExcLP	0.0107536	0.0100535	0.0146518	0.0106956	0.013083	0.014559	0.0117327	0.0101933	0.0164078	0.0136855	0.0158364	0.0122234	0.0105863	0.0149393	0.0181678	0.0140868	0.0233055	0.0149689	0.0122488	0.0102096	0.0105522	0.0120278	0.0135556	0.0151074	0.0104581	0.0102079	0.0105979	0.0173995	0.0108718	0.010796	0.0189712	0.0203974	0.0126235	0.0183026	0.0148055	0.013535	0.0113019	0.0123342	0.0151014	0.0141033	0.0327641	0.0267226	0.0196947	0.015203	0.0167105	0.024081	0.0153352	0.0247014	0.015275
InhNH,NO,LP	1.56586	1.52153	1.74741	1.51487	1.57954	1.44469	1.00298	0.738303	0.466104	0.350483	0.240898	0.315529	0.0649025	0.264029	0.0205889	0.27992	0.2902	0.256148	0.0102172	0.151165	0.402878	0.366019	0.286525	0.315831	0.331036	0.733202	0.689883	0.628849	0.735638	0.664381	0.955418	1.16218	1.3311	0.975422	0.980979	0.618216	0.861423	0.60532	0.753556	0.654267	0.385021	0.506393	0.874831	1.20439	1.31523	1.48409	1.73569	1.75868	1.73764
gmax,SZ,SP	0.842874	0.721948	0.844908	1.14193	1.34594	1.7653	1.37301	1.36877	1.21451	1.61903	1.42688	1.21192	1.53409	1.34254	1.08586	0.879324	0.846812	1.16723	1.02307	1.00925	1.08528	0.982194	0.985437	0.924241	0.956659	0.836944	0.73875	0.644918	0.573957	0.837557	0.638706	0.991176	1.00415	0.809452	0.93274	1.06833	1.09343	0.819525	0.937715	0.997184	0.810526	1.16556	1.33606	1.00404	1.02426	1.48334	1.59226	1.3617	1.96946
gmax,SZ,LP	0.52614	0.707925	0.618866	0.672222	0.661754	0.611544	0.632198	0.513237	0.557834	0.555205	0.595246	0.453091	0.398013	0.503482	0.280654	0.206696	0.180066	0.269095	0.363013	0.341357	0.369294	0.384642	0.337508	0.24075	0.332323	0.354899	0.290265	0.437002	0.277021	0.366082	0.283827	0.227927	0.1497	0.250351	0.291676	0.269364	0.320902	0.314064	0.273679	0.219002	0.317637	0.334557	0.210501	0.295169	0.340784	0.406715	0.520667	0.52524	0.485731
ivSZ,SP	0.472671	0.692302	0.423506	0.50796	0.375331	0.301523	0.528978	0.739604	1.06987	0.558281	0.677864	0.900712	1.12439	0.887617	0.899594	1.63534	1.37412	0.792492	0.78383	0.905889	1.01299	1.08298	0.866744	1.35643	0.914951	1.16035	1.2056	1.54919	1.95489	1.68199	1.27686	0.824662	0.614511	1.12838	1.35554	1.11683	0.772719	1.15434	1.0821	0.970765	1.94844	2.09119	1.27558	1.39705	1.6478	1.05594	1.28326	0.665703	0.595524
ivSZ,LP	1.38283	1.41025	2.57224	3.41019	4.79655	5.05561	2.59975	3.01842	3.0659	1.50493	1.36457	2.94795	2.89454	1.91402	3.21872	3.57467	4.09495	2.23482	1.49336	1.93357	1.86452	1.10508	1.03118	1.94735	0.903084	1.1483	0.886146	0.760914	1.38203	1.60049	2.4246	1.64945	2.61012	1.34352	0.622537	0.356597	0.350777	1.14516	1.62193	2.27287	1.34409	1.3422	1.48791	1.04413	1.08955	2.05939	1.37604	0.908625	0.794803
threshSZ,SP	0.0880425	0.0998907	0.0982793	0.0972937	0.0937215	0.099289	0.0965922	0.0903754	0.0848236	0.0616272	0.0732169	0.0783122	0.0932459	0.0994744	0.097145	0.0990162	0.0968473	0.0985911	0.0960252	0.096332	0.0884194	0.0969955	0.0952767	0.0958206	0.0756123	0.0628696	0.0713457	0.0784945	0.0795394	0.0812254	0.0783502	0.0734675	0.0845609	0.0799305	0.0918931	0.0873956	0.0920248	0.0875013	0.0947866	0.0854903	0.0910669	0.0930091	0.0873017	0.0897543	0.0895675	0.0966217	0.092405	0.0962113	0.0975288
threshSZ,LP	0.00478951	0.00329013	0.00545349	0.00604637	0.00863505	0.0100944	0.0257726	0.0284689	0.0229724	0.00880658	0.000437866	0.0106639	0.0145731	0.0163474	0.00756904	0.00388428	0.00567064	0.000418011	0.00232804	0.00517993	0.00104539	0.0168029	0.000731671	0.0165424	0.0157702	0.0157031	0.00524701	0.000915007	0.00455583	0.00112093	0.00997448	0.0219789	0.013365	0.0168563	0.000809266	0.00202976	0.0053305	0.0099819	0.0033149	0.00372123	0.00102724	0.00200365	0.000968726	0.00235185	0.0104217	0.000935877	0.00380778	0.000644691	0.000624928
mortSZ	0.0199238	0.0213195	0.0158816	0.0352465	0.0442777	0.0483766	0.0302547	0.0294647	0.0320543	0.0379188	0.0463581	0.0403911	0.0358741	0.0350419	0.0442401	0.0372024	0.0511428	0.0517588	0.0649598	0.0649963	0.0785433	0.0772965	0.0568003	0.0610921	0.0524507	0.0458873	0.0328413	0.0463089	0.0355907	0.0382457	0.0279839	0.0278779	0.0329101	0.0336926	0.0340205	0.0207563	0.0290294	0.0282352	0.0298333	0.0373946	0.042726	0.0424494	0.0556653	0.0475501	0.0568453	0.0669849	0.0721192	0.0631911	0.0664396
AESZ	0.564295	0.550433	0.623251	0.598004	0.564769	0.568992	0.620991	0.597277	0.645273	0.655614	0.674327	0.639945	0.622899	0.623889	0.559429	0.542419	0.574453	0.585544	0.639533	0.652919	0.581495	0.575762	0.503701	0.556619	0.508432	0.590117	0.544731	0.581259	0.54678	0.500629	0.519051	0.546454	0.543395	0.559909	0.561966	0.547398	0.537362	0.521509	0.518842	0.521277	0.545206	0.531566	0.513334	0.599874	0.612653	0.563311	0.6138	0.606798	0.601783
GGESZ	0.34608	0.34922	0.348252	0.347023	0.342144	0.319802	0.313318	0.313423	0.29098	0.284151	0.302436	0.291597	0.278839	0.281747	0.275857	0.275473	0.276183	0.266706	0.273953	0.284062	0.293261	0.282186	0.294035	0.283909	0.283335	0.298537	0.314386	0.322226	0.320667	0.330254	0.321624	0.321891	0.325541	0.342982	0.340467	0.335791	0.33915	0.341408	0.348997	0.342126	0.331128	0.331766	0.329845	0.329568	0.328674	0.335216	0.337713	0.336109	0.34454
gmax,LZRES,SP	0.180741	0.124816	0.11849	0.101516	0.117923	0.0904665	0.0823982	0.0744979	0.0803057	0.0891376	0.0909067	0.100573	0.0825027	0.140544	0.118269	0.106118	0.0748387	0.0612761	0.103907	0.0868474	0.069187	0.0638794	0.0307003	0.0396176	0.0344642	0.0494573	0.0679727	0.145214	0.162604	0.161872	0.158686	0.160909	0.165339	0.131074	0.129572	0.181548	0.145363	0.18394	0.253159	0.223134	0.204412	0.198284	0.131543	0.147281	0.140341	0.202821	0.280637	0.224984	0.174873
gmax,LZRES,LP	0.329933	0.208103	0.209857	0.241679	0.270498	0.265237	0.274009	0.283429	0.224765	0.170818	0.109845	0.110602	0.107158	0.130238	0.14634	0.139563	0.139886	0.141526	0.105717	0.11522	0.112781	0.128617	0.109892	0.104016	0.122806	0.105829	0.124765	0.158756	0.170431	0.291736	0.335827	0.464798	0.406129	0.508684	0.611351	0.689471	0.821147	0.770058	0.67494	0.599284	0.650082	0.770455	0.918079	0.859561	0.829236	0.87239	0.926646	0.963533	0.605394
gmax,LZRES,SZ	0.134303	0.149767	0.165498	0.194746	0.220856	0.13812	0.106889	0.133409	0.108	0.122156	0.185998	0.200175	0.14711	0.130424	0.154449	0.160157	0.215295	0.190668	0.153604	0.120097	0.101064	0.119741	0.100187	0.112111	0.155505	0.102203	0.118464	0.100737	0.105329	0.142921	0.125629	0.127143	0.122783	0.102433	0.137835	0.1397	0.1007	0.114302	0.133627	0.147838	0.10853	0.10021	0.131681	0.107401	0.116244	0.108158	0.113474	0.122008	0.11361
ivLZRES,SP	3.59504	4.42363	4.17228	4.28374	5.1066	2.87924	4.69048	4.8338	8.92321	8.21153	7.41158	5.85637	5.98129	2.99858	3.47872	5.40284	6.46151	5.1324	4.0402	7.07508	7.07021	7.67077	5.73912	9.54521	7.91702	6.31399	8.27711	4.80893	3.71788	5.53822	2.43525	2.07978	1.6808	1.4081	1.07356	1.57401	1.28959	0.965215	0.853944	0.430274	0.42798	0.749309	1.05549	1.29453	1.38893	1.23977	1.61335	0.905743	1.22057
ivLZRES,LP	0.208438	0.421474	0.477139	0.690927	1.1659	1.6596	0.973126	0.851661	0.827628	1.43511	2.30356	3.4498	6.35602	2.51274	1.17934	0.676499	0.583529	1.0879	1.11969	0.993291	1.0169	1.00536	1.01435	0.695406	1.45755	1.011	1.67018	1.60471	0.959833	0.524373	0.981779	1.01708	0.951668	0.840714	0.856064	0.580003	0.568271	0.83498	0.638238	0.685129	0.685149	0.524478	0.827441	0.356489	0.324823	0.244611	0.141501	0.214936	0.181592
ivLZRES,SZ	1.26907	3.49259	1.94655	4.50862	6.06276	6.35608	8.54399	7.99833	3.33727	1.5315	1.55631	1.34986	0.951573	0.402859	0.490254	0.356717	0.196095	0.201602	0.440592	0.370494	0.44905	0.357182	0.288911	0.326065	0.403874	0.320419	0.204551	0.330478	0.226919	0.237659	0.245837	0.178869	0.402267	0.516502	0.144763	0.157617	0.294824	0.209179	0.288704	0.342515	0.624865	0.715909	1.01106	0.489899	0.745571	0.8823	1.27617	0.908153	0.620444
AELZRES	0.795358	0.817479	0.81153	0.751412	0.738648	0.741009	0.775249	0.763987	0.776307	0.792699	0.832188	0.876137	0.878978	0.878178	0.879484	0.87728	0.815743	0.817342	0.859676	0.889443	0.872771	0.884489	0.874989	0.848667	0.863215	0.88071	0.882077	0.865189	0.835995	0.876866	0.826441	0.843353	0.884041	0.854359	0.883713	0.852807	0.854447	0.840795	0.830115	0.795951	0.875194	0.868861	0.835359	0.891328	0.886694	0.853808	0.85043	0.879432	0.863021
actres,LZRES	0.100567	0.186016	0.292303	0.153953	0.166008	0.222787	0.14553	0.169018	0.114633	0.116437	0.0998225	0.0568804	0.059466	0.0652762	0.124886	0.0790587	0.111055	0.083015	0.10366	0.161786	0.212196	0.115162	0.0758669	0.0488526	0.0609078	0.0544378	0.113518	0.108726	0.111593	0.101767	0.0815152	0.0528724	0.0474868	0.0420354	0.0513347	0.0360772	0.0391999	0.0347159	0.0243182	0.0386105	0.0785227	0.0824494	0.0792241	0.0418974	0.0512949	0.0731269	0.0790086	0.0449893	0.0396119
mortday,LZRES	0.0388845	0.00406543	0.0230087	0.056508	0.0766203	0.0747606	0.0963594	0.0630219	0.0927565	0.152527	0.109791	0.112934	0.135509	0.166029	0.181797	0.167966	0.189706	0.220713	0.141818	0.139818	0.123576	0.0412273	0.0212854	0.0780313	0.11684	0.102098	0.135263	0.077254	0.0605	0.0577826	0.0686304	0.0949325	0.0681832	0.0971528	0.0769411	0.165646	0.129842	0.192523	0.193502	0.189331	0.121072	0.124579	0.222716	0.150214	0.221348	0.205199	0.199067	0.231524	0.195423
threshLZRES,SP	0.0395395	0.0329303	0.0335486	0.0285209	0.011133	0.00565477	0.0187815	0.0200867	0.0284644	0.0289285	0.0396961	0.041844	0.024979	0.0346855	0.0277997	0.0113415	0.0164198	0.0193077	0.0170898	0.0287451	0.0164926	0.0294167	0.0497226	0.0466898	0.0520618	0.0778798	0.0709571	0.0815794	0.0799216	0.0741152	0.0930796	0.0907157	0.0911421	0.0716329	0.0740195	0.0771129	0.0847535	0.0847102	0.092116	0.0888409	0.0890779	0.0746014	0.0729048	0.0688073	0.0639142	0.0605039	0.048786	0.0411061	0.0266556
threshLZRES,LP	0.0418188	0.020242	0.0252595	0.0351545	0.0501029	0.0525009	0.0505185	0.0502125	0.0576938	0.0710271	0.0691619	0.0783104	0.0942362	0.0861876	0.0835693	0.0643608	0.0888868	0.0967078	0.0973768	0.0906745	0.0958635	0.0868628	0.0809091	0.0810006	0.0722361	0.0776475	0.0714892	0.0922818	0.0888183	0.0920905	0.0838042	0.0821923	0.0855386	0.0873493	0.0999595	0.0878098	0.0857589	0.0727456	0.0633007	0.0722303	0.0796607	0.0879277	0.0805899	0.0941173	0.0979814	0.0953483	0.0916155	0.0952378	0.0903771
threshLZRES,SZ	0.0655305	0.0606269	0.0666847	0.063196	0.0726688	0.0652106	0.081677	0.0766409	0.0741073	0.064577	0.0653628	0.0802438	0.0515267	0.0463792	0.056558	0.0630749	0.0585549	0.0743116	0.064023	0.0678385	0.0611136	0.0562043	0.0585304	0.057215	0.0630925	0.0649239	0.0640615	0.0532131	0.0306324	0.0275779	0.0235809	0.019576	0.0294971	0.0491635	0.0602551	0.077482	0.0719129	0.061803	0.0739495	0.0904812	0.0951288	0.0764783	0.0797429	0.0758055	0.0907384	0.0827466	0.0813001	0.0641598	0.0632676
mortnight,LZ	0.168171	0.161852	0.147697	0.135136	0.0830949	0.0733611	0.116401	0.108203	0.0701651	0.0504409	0.0553563	0.0610465	0.0706262	0.0618252	0.0689641	0.0648127	0.0539263	0.0844088	0.102918	0.128358	0.119184	0.0931911	0.0721395	0.0987034	0.0956469	0.104427	0.105224	0.100448	0.0700743	0.0620988	0.060433	0.0579233	0.0754917	0.0550121	0.0447844	0.0611861	0.051189	0.0542211	0.0876268	0.096153	0.0930683	0.092594	0.114513	0.0943598	0.0914696	0.0767325	0.0761609	0.0986116	0.10619
Ika2	0.0656	0.0656	0.0656	0.0656	0.0656	0.0656	0.0656	0.0656	0.0656	0.0656	0.0656	0.0656	0.0656	0.0656	0.0656	0.0656	0.0656	0.0656	0.0656	0.0656	0.0656	0.0656	0.0656	0.0656	0.0656	0.0656	0.0656	0.0656	0.0656	0.0656	0.0656	0.0656	0.0656	0.0656	0.0656	0.0656	0.0656	0.0656	0.0656	0.0656	0.0656	0.0656	0.0656	0.0656	0.0656	0.0656	0.0656	0.0656	0.0656
IkLZ	0.0237153	0.0309808	0.0222703	0.0306649	0.0229221	0.0255136	0.0258517	0.0207544	0.0285948	0.0299372	0.0327516	0.0226824	0.0332785	0.0368171	0.0317619	0.0276629	0.0227682	0.0201957	0.0299569	0.0325488	0.0295615	0.0290463	0.0211642	0.0311406	0.0333783	0.029355	0.0309723	0.0407908	0.0502127	0.0444117	0.0348245	0.0383314	0.0323544	0.0279347	0.0244367	0.0283213	0.0202082	0.0273248	0.025733	0.0228557	0.027599	0.0278602	0.0235585	0.0225994	0.0281736	0.0329426	0.0446065	0.0413528	0.0382447
gmax,LZDVM,SP	0.0917383	0.108204	0.0811015	0.0623795	0.0433128	0.0361101	0.0511066	0.086504	0.0852274	0.0801747	0.07597	0.0763236	0.0940927	0.186224	0.287796	0.179329	0.140529	0.241473	0.247554	0.163937	0.270679	0.148912	0.183535	0.131604	0.0934454	0.18611	0.142039	0.18233	0.127064	0.0713568	0.0669893	0.0575058	0.0490896	0.0409114	0.0426481	0.0572476	0.0366985	0.035314	0.0604621	0.0388363	0.0339657	0.0278888	0.0193318	0.0451078	0.127031	0.151343	0.11312	0.178261	0.168347
gmax,LZDVM,LP	0.470247	0.402876	0.311125	0.177144	0.178889	0.133048	0.108165	0.103126	0.103219	0.107638	0.105069	0.132512	0.145545	0.101804	0.116476	0.113177	0.108446	0.108541	0.112823	0.161372	0.151968	0.14866	0.212873	0.156791	0.153402	0.108429	0.156753	0.191176	0.195107	0.245734	0.228528	0.164931	0.200624	0.168814	0.183695	0.172589	0.157472	0.148026	0.116368	0.172776	0.217802	0.273031	0.273218	0.577118	0.564276	0.54621	0.517142	0.721828	0.74667
gmax,LZDVM,SZ	0.828054	0.800436	0.494002	0.564709	0.314642	0.408365	0.483176	0.544203	0.49766	0.30693	0.301812	0.320579	0.33413	0.437237	0.458235	0.416372	0.449117	0.711544	0.708135	0.84032	0.872806	0.817692	0.841526	0.861298	0.995342	0.895129	0.771922	0.579396	0.611281	0.567174	0.657841	0.604183	0.570412	0.456555	0.376499	0.461192	0.549498	0.577851	0.89383	0.589273	0.679735	0.560606	0.477329	0.437996	0.359177	0.209888	0.276022	0.598054	0.705485
ivLZDVM,SP	1.30639	1.62606	1.35726	1.45067	2.65548	3.17833	2.16311	3.51752	2.27005	0.976256	1.32965	1.83889	1.46323	0.867356	0.873143	1.40345	2.11137	2.9171	2.63784	2.97932	2.09993	2.08616	2.62627	3.94081	8.5882	7.35515	8.32815	8.32315	9.96861	4.78979	5.99251	6.63556	8.87809	7.97034	5.14148	3.55282	2.76697	2.17537	1.85329	1.0719	1.29527	2.60665	2.08097	2.56602	1.98666	2.84573	2.2685	2.83242	4.48134
ivLZDVM,LP	1.41572	1.12479	2.95062	1.78083	2.33161	1.39278	1.26233	1.51704	0.962167	1.91823	1.89744	3.89075	5.71742	6.26425	6.97673	6.9276	5.7193	3.28251	4.55252	5.75142	4.34792	2.69962	5.27173	2.71986	1.70096	2.05304	1.99898	0.929346	1.17282	0.730075	1.15638	1.01923	1.46582	1.40278	0.762955	1.18323	2.83729	2.89728	4.68418	5.09982	7.23443	9.3179	7.97239	3.60947	3.04286	3.9729	4.45816	2.61319	4.35616
ivLZDVM,SZ	1.09354	0.796011	1.45684	1.30293	1.5807	2.03689	1.42777	1.01615	0.71338	0.347192	0.657668	0.289476	0.390001	0.44559	0.52432	0.460362	0.319205	0.370161	0.262368	0.327471	0.253356	0.32464	0.365877	0.793538	0.330003	0.264421	0.157774	0.750797	0.985128	2.13517	1.85721	2.17951	2.57432	5.13961	3.61586	2.20603	2.88172	3.61983	3.48612	1.09563	0.628086	0.949165	2.3766	1.3031	2.06404	2.14109	2.56904	1.67931	0.908786
AELZDVM	0.778379	0.702367	0.646171	0.650097	0.57606	0.555718	0.597264	0.584096	0.605802	0.618156	0.594343	0.571643	0.606172	0.618475	0.598978	0.602934	0.590792	0.528219	0.507573	0.593197	0.546797	0.536817	0.583975	0.624005	0.631573	0.685896	0.633247	0.592497	0.610866	0.609694	0.614784	0.608047	0.652059	0.625768	0.616767	0.605335	0.603127	0.630398	0.743913	0.694834	0.710686	0.631781	0.68318	0.718452	0.73444	0.679991	0.707107	0.656028	0.662806
actres,LZDVM	0.0101395	0.0135297	0.0181053	0.0196198	0.012545	0.0109987	0.0169248	0.0250207	0.0282386	0.0162571	0.0218576	0.0223726	0.0337835	0.031707	0.0349952	0.0211333	0.0252763	0.0270441	0.0207893	0.0134649	0.0126437	0.0145994	0.0111938	0.0139847	0.020811	0.0263264	0.0158387	0.0116877	0.0176126	0.0231693	0.016518	0.0140289	0.0107494	0.0244497	0.0200559	0.0569654	0.104741	0.108962	0.0911033	0.0841988	0.115769	0.170431	0.212928	0.161154	0.287186	0.288364	0.149491	0.210093	0.295553
mortday,LZDVM	0.19369	0.159394	0.0918791	0.112689	0.187381	0.138911	0.140465	0.158099	0.186118	0.214684	0.149485	0.233316	0.193757	0.195249	0.208326	0.231403	0.302212	0.25567	0.222906	0.301919	0.318708	0.322605	0.331304	0.32231	0.370698	0.350434	0.316426	0.308356	0.372345	0.331851	0.25825	0.248459	0.236043	0.284268	0.268186	0.193673	0.222816	0.118164	0.0331079	0.0629536	0.0941072	0.053197	0.0522301	0.0212708	0.0287637	0.0657059	0.0201161	0.117157	0.201056
gmax,PZRES,SP	0.0591004	0.0597285	0.0751591	0.0548175	0.0664631	0.0576465	0.0850934	0.0677575	0.0872938	0.126479	0.102056	0.107488	0.0698817	0.0710425	0.103366	0.119174	0.0656034	0.0427317	0.0453814	0.0451079	0.0400829	0.035126	0.0354143	0.040404	0.0346403	0.0347865	0.0536325	0.108405	0.128715	0.201726	0.150173	0.135647	0.130625	0.141327	0.159431	0.125426	0.116825	0.129848	0.0821508	0.127609	0.0712952	0.138632	0.117155	0.121435	0.10308	0.0849719	0.0673474	0.0530318	0.0787964
gmax,PZRES,LP	0.410246	0.566238	0.353135	0.361514	0.426502	0.529034	0.418343	0.346262	0.197616	0.141515	0.172959	0.211027	0.202933	0.1986	0.125905	0.183922	0.176545	0.16499	0.192236	0.201534	0.217312	0.119073	0.0851184	0.0638136	0.068173	0.0592917	0.0886873	0.0700246	0.108672	0.099528	0.0722843	0.069943	0.0529206	0.0528611	0.054642	0.102502	0.132351	0.0816526	0.0958319	0.0676387	0.0606524	0.0631512	0.05674	0.0704418	0.0503602	0.0593767	0.0572009	0.0530752	0.0663665
gmax,PZRES,SZ	0.66876	0.85318	0.805056	0.641867	0.451326	0.414896	0.55103	0.535936	0.939196	0.959064	0.856323	0.595699	0.837423	0.699188	0.513944	0.412756	0.376548	0.571894	0.611809	0.615383	0.769985	0.422918	0.30827	0.366447	0.29693	0.500659	0.60298	0.799352	0.714797	0.495893	0.494185	0.305467	0.248201	0.483305	0.419269	0.258036	0.167239	0.151066	0.102643	0.0931265	0.0811428	0.0728678	0.0600491	0.0798172	0.0799213	0.0532653	0.0797474	0.116264	0.0820748
gmax,PZRES,LZ	0.150206	0.1453	0.158043	0.129038	0.125859	0.151658	0.143154	0.14889	0.143115	0.164155	0.185554	0.205915	0.255831	0.212681	0.264	0.281422	0.299426	0.3217	0.444601	0.543044	0.688154	0.508207	0.413395	0.380168	0.600014	0.485663	0.456323	0.670722	0.821075	0.76895	0.874054	0.692292	0.329489	0.437881	0.451974	0.443584	0.497103	0.443341	0.553115	0.402346	0.554273	0.94577	0.798074	0.503361	0.394882	0.584043	0.504458	0.884965	0.873421
ivPZRES,SP	5.5328	8.0349	5.68345	3.58357	5.53797	5.57517	5.75071	8.81964	2.54492	3.737	7.18942	3.59224	3.71153	7.34042	5.99474	3.82569	5.38983	8.25887	6.60336	7.95079	9.12388	7.54622	6.47948	7.83651	9.16637	5.38773	4.97127	4.54576	2.70332	3.65721	2.20389	1.82315	1.08078	1.42452	1.03465	1.90479	2.49175	2.447	2.05489	1.60837	2.16377	2.80546	4.70842	8.23584	5.71579	7.1015	8.85729	6.61259	4.30847
ivPZRES,LP	0.555733	0.625487	0.896188	1.08075	1.12152	1.21282	0.813584	0.863163	1.45052	1.97936	1.79059	1.60394	2.28284	2.11845	0.995041	1.07322	0.791368	1.29561	2.16213	2.0356	1.1795	0.699904	0.860027	1.10493	1.32455	0.882618	1.08477	0.373222	0.748064	0.871195	0.615033	1.0847	0.645515	0.540816	0.720921	0.457936	0.451525	0.397889	0.879469	0.719016	0.272762	0.225854	0.244	0.422732	0.392831	0.484081	0.60908	0.824392	0.550948
ivPZRES,SZ	0.1618	0.195274	0.126873	0.12033	0.179897	0.123609	0.104654	0.112381	0.109188	0.122624	0.103855	0.103164	0.130061	0.146836	0.140005	0.165715	0.142833	0.226329	0.18457	0.145693	0.206115	0.160959	0.187037	0.117594	0.129368	0.115119	0.115834	0.123447	0.10327	0.185165	0.259718	0.305385	0.151856	0.178031	0.161386	0.180756	0.18912	0.159441	0.122915	0.122587	0.124105	0.141585	0.140995	0.211236	0.516699	1.34919	1.19215	1.81748	3.53922
ivPZRES,LZ	0.181795	0.146369	0.136775	0.116251	0.194871	0.342812	0.313959	0.569818	1.09693	2.2475	2.02847	5.08252	4.43988	2.98993	4.09106	2.62511	1.29224	0.560954	0.784379	1.01745	0.573299	0.401821	0.348942	0.170892	0.159709	0.115702	0.181311	0.176801	0.308146	0.491712	0.418906	0.360906	0.567881	2.14122	2.13993	1.64831	0.647593	0.60269	0.346533	0.532956	0.394761	0.27188	0.632255	0.571667	0.490596	0.671901	0.930831	0.773473	1.0321
AEPZRES	0.617776	0.686996	0.706599	0.785903	0.813583	0.790996	0.792904	0.743045	0.703024	0.735917	0.654568	0.625378	0.618995	0.639596	0.620904	0.562287	0.564255	0.526976	0.556201	0.542276	0.538906	0.51406	0.546346	0.583282	0.620188	0.636491	0.642283	0.630348	0.579483	0.641296	0.675621	0.640291	0.658426	0.651805	0.633308	0.64755	0.630295	0.610315	0.614726	0.609408	0.653411	0.718289	0.726077	0.787936	0.830917	0.858704	0.878003	0.8408	0.827802
actres,PZRES	0.0169498	0.0232575	0.0253789	0.0197228	0.0225268	0.0446233	0.0412378	0.0395923	0.0435342	0.0366405	0.0492757	0.0284991	0.0256735	0.0353922	0.033852	0.0465598	0.0743732	0.0617441	0.0418939	0.049118	0.0766642	0.148608	0.169151	0.157962	0.127999	0.112436	0.13024	0.129786	0.167734	0.147438	0.120553	0.141666	0.160477	0.1353	0.174328	0.136523	0.145986	0.179906	0.204242	0.17293	0.110322	0.130852	0.160186	0.181089	0.164746	0.212443	0.191619	0.256192	0.163371
mortday,PZRES	0.0853365	0.142143	0.0846834	0.149164	0.157547	0.149267	0.0898418	0.0908903	0.0439336	0.0493451	0.0730964	0.0584666	0.0112292	0.0391883	0.0512503	0.104449	0.194359	0.1702	0.144392	0.154699	0.134622	0.178741	0.244243	0.296135	0.209025	0.214771	0.263382	0.24229	0.254389	0.216402	0.110877	0.102752	0.0597865	0.0240058	0.0134724	0.0132515	0.0441659	0.00166723	0.0643672	0.0293966	0.0445396	0.0264026	0.0751751	0.0787216	0.0888116	0.00173904	0.0208187	0.127736	0.150475
inhSZLZLP,SP	0.06827	0.481128	0.0392829	0.696258	0.398636	1.76876	0.741201	0.278374	0.139086	1.28232	1.43028	0.654536	1.71545	0.655044	1.9659	2.35108	0.83136	1.14487	1.81414	2.69292	2.60538	1.28407	1.22345	0.717241	1.70764	1.96841	1.58009	1.24298	2.3407	2.88258	2.54833	2.70094	3.23259	3.54354	2.29027	2.35095	1.42172	2.01112	2.09043	1.71938	2.2179	2.31912	2.80966	2.56796	1.78136	2.21082	2.29334	0.356985	0.143061
inhSZLZ,LP	6.29971	6.98913	4.97201	5.89426	6.03712	3.73083	4.36354	5.93512	6.76352	7.65146	7.68954	7.82144	8.736	9.8047	9.45663	8.82115	9.93991	9.58073	7.65296	7.23409	6.97474	6.88156	7.9234	8.06025	9.01169	8.67793	8.34282	7.68128	8.00126	8.23053	8.55205	9.66661	9.01499	9.76708	9.45554	9.30752	8.47575	6.38357	6.62611	4.06084	4.57629	3.60971	4.74246	4.75761	5.37715	6.61506	7.38677	7.78215	7.9123
inhLZ,SZ	9.33358	8.76131	9.70377	9.13324	9.69888	8.95863	8.50259	8.35757	7.96885	7.77232	7.82032	7.6727	9.28442	9.06578	9.59582	8.41129	9.60677	7.53975	7.24568	6.41726	6.47715	5.99514	6.40597	6.63218	7.4956	8.42142	9.23404	9.29049	8.67823	9.04309	9.984	9.79254	9.77423	9.4577	9.821	9.62348	9.83278	9.12771	9.65785	9.3276	8.77397	9.42647	8.31557	8.72962	8.77987	9.60507	9.93328	9.52037	8.4913
threshPZRES,SP	0.0845737	0.0882752	0.0813152	0.0764427	0.0931387	0.0752829	0.0855323	0.0983554	0.0831329	0.096237	0.0847185	0.0996731	0.0890955	0.0968105	0.0974941	0.0969015	0.0906568	0.0968807	0.0952833	0.0945141	0.0912501	0.098343	0.0984116	0.0709455	0.0715603	0.0639464	0.0412108	0.0232073	0.00834107	0.0222616	0.0183174	0.0199843	0.027557	0.0471903	0.0348506	0.0350951	0.0357589	0.0329879	0.028593	0.0132948	0.032455	0.0315298	0.0377137	0.043608	0.0398628	0.035429	0.030212	0.0169921	0.0124806
threshPZRES,LP	0.0847435	0.0974646	0.0993852	0.0892907	0.0979946	0.0974524	0.0972338	0.0880167	0.0873242	0.0635733	0.0695229	0.0834395	0.0882051	0.0684228	0.0604734	0.0718999	0.0803424	0.0884988	0.0884574	0.0824693	0.0846595	0.0758922	0.071744	0.0849675	0.0704442	0.0778511	0.0769367	0.0705172	0.0675926	0.0601536	0.0554982	0.0540873	0.064814	0.0472523	0.059516	0.0601299	0.0546106	0.0634738	0.0762523	0.090018	0.0772093	0.085211	0.0840989	0.0738335	0.0937723	0.0861916	0.0965023	0.0834126	0.098853
threshPZRES,SZ	0.0587948	0.0669929	0.0582132	0.05637	0.0519534	0.0412723	0.0323867	0.026965	0.0333134	0.0464941	0.0430015	0.0479981	0.0497177	0.0405785	0.0541058	0.0690119	0.079269	0.0816214	0.0639325	0.0639708	0.0518656	0.0649035	0.0899176	0.0836298	0.0857275	0.080821	0.0785266	0.0897799	0.0969161	0.0933206	0.0951369	0.0834062	0.0847128	0.0999779	0.0998658	0.0940266	0.0940717	0.0895656	0.0728733	0.0753546	0.0778075	0.0747526	0.0736677	0.0848766	0.0919485	0.0949536	0.0917307	0.0827886	0.0818223
threshPZRES,LZ	0.067295	0.0827998	0.0808435	0.0828457	0.0778503	0.0693577	0.0871362	0.0749427	0.0770742	0.0837964	0.075239	0.0727817	0.0881286	0.0885888	0.0913336	0.093689	0.0978742	0.0809345	0.076046	0.0630456	0.0567873	0.0563917	0.0627476	0.0502456	0.0567784	0.0570206	0.0569048	0.0586139	0.0546307	0.0597311	0.0634722	0.0531974	0.052381	0.0491543	0.0466113	0.0547772	0.0358524	0.0325046	0.0379452	0.0401164	0.034067	0.0281992	0.00874993	0.00915568	0.0188703	0.0347713	0.0343484	0.0377788	0.0304838
mortnight,PZRES	0.0492069	0.0951131	0.138652	0.0636713	0.0587868	0.0408652	0.0132576	0.00250114	0.0849742	0.0544076	0.000180994	0.0475495	0.0344615	0.0705727	0.137819	0.167499	0.241044	0.173638	0.158845	0.149509	0.215172	0.193084	0.180258	0.219098	0.264022	0.280822	0.217131	0.177289	0.17261	0.122185	0.0245549	0.0165442	0.00023286	0.0257623	0.0724907	0.110158	0.159084	0.0706611	0.0987144	0.0878531	0.00512854	0.0489262	0.00530377	0.0655306	0.00151394	0.0114211	0.0227024	0.0580325	0.0426819
IkPZ	0.0200252	0.0152967	0.0153665	0.0130447	0.0126263	0.0139856	0.0161845	0.0163075	0.0140005	0.0126395	0.0204646	0.019964	0.0167565	0.017367	0.0120359	0.0171099	0.0105247	0.0133242	0.0114322	0.0102793	0.0156896	0.0143277	0.0134849	0.0165639	0.0123084	0.0108039	0.0105697	0.0133385	0.0105285	0.0155728	0.0210437	0.0192472	0.0192094	0.0152877	0.0159995	0.0148701	0.0119655	0.0121267	0.0122379	0.0126951	0.0216542	0.0254508	0.0255287	0.0363632	0.0349402	0.0312316	0.0291505	0.0313979	0.0317653
gmax,PZDVM,SP	0.114545	0.127906	0.17703	0.210827	0.225286	0.25712	0.171712	0.16745	0.113033	0.118081	0.100007	0.169321	0.239833	0.118348	0.182808	0.135106	0.1293	0.0978428	0.12474	0.137566	0.136193	0.133211	0.150743	0.0536771	0.077901	0.0396575	0.0530919	0.0606826	0.0953242	0.119458	0.111772	0.150246	0.133683	0.0923755	0.121229	0.124776	0.121641	0.0821838	0.125563	0.0896894	0.0978397	0.0701681	0.0798438	0.0685746	0.041627	0.0408292	0.0613637	0.042549	0.0314958
gmax,PZDVM,LP	0.187685	0.111098	0.0979484	0.116617	0.141847	0.112462	0.0882205	0.102223	0.149788	0.120214	0.129605	0.103162	0.0743423	0.0692688	0.0556767	0.074033	0.0731081	0.0536844	0.0502076	0.0906493	0.0937491	0.102196	0.0909424	0.0984753	0.120108	0.0896971	0.171346	0.129619	0.10479	0.128997	0.110652	0.0703799	0.0893591	0.07896	0.0580194	0.0825063	0.130726	0.1122	0.109702	0.131952	0.23391	0.192475	0.246062	0.307127	0.363352	0.598676	0.580335	0.918737	0.929683
gmax,PZDVM,SZ	0.433605	0.496333	0.424473	0.516494	0.430586	0.401123	0.415467	0.681163	0.568058	0.852275	0.810752	0.793333	0.756203	0.718696	0.517955	0.561835	0.839396	0.904176	0.746619	0.990617	0.585068	0.496598	0.895235	0.717043	0.535154	0.681112	0.689821	0.601202	0.493566	0.533868	0.395038	0.554042	0.599922	0.592453	0.758941	0.685981	0.481537	0.341996	0.397058	0.425675	0.420385	0.485254	0.494192	0.545208	0.420994	0.628963	0.67816	0.66167	0.576971
gmax,PZDVM,LZ	0.804557	0.558819	0.960029	0.735257	0.58018	0.765901	0.850046	0.876444	0.881416	0.488481	0.340581	0.383042	0.327418	0.261412	0.49975	0.620991	0.692541	0.569182	0.587243	0.626714	0.823285	0.977914	0.471362	0.803813	0.653058	0.742908	0.761086	0.928487	0.480334	0.455382	0.421481	0.636722	0.552156	0.591654	0.484985	0.709684	0.783921	0.766753	0.641496	0.549774	0.38552	0.419813	0.370173	0.452469	0.592963	0.418704	0.665574	0.717054	0.453978
ivPZDVM,SP	8.23259	8.43184	4.31712	8.64698	8.21091	5.78364	7.92467	6.27348	7.25964	9.99353	4.30552	4.02453	5.59948	3.86673	4.41975	3.45288	3.22869	2.64327	1.4553	1.18423	1.32088	1.03013	1.07595	1.64197	1.03691	3.12924	9.16296	7.85447	5.35617	5.31045	6.6026	7.39458	7.8206	8.62207	4.74062	9.4119	8.81401	8.72423	5.34149	5.01158	4.0439	4.41066	6.24593	8.49518	9.15223	7.21333	9.86967	6.49714	8.44894
ivPZDVM,LP	2.81467	2.20484	0.92889	0.644596	0.503537	0.69723	0.974514	0.947907	0.768599	0.82159	1.10744	0.528368	0.25311	0.142687	0.132905	0.118554	0.188208	0.182807	0.161684	0.442382	0.134815	0.198675	0.11666	0.282235	0.256344	1.4331	1.48114	1.31401	1.56291	0.651717	1.05073	1.48697	1.76969	1.25475	0.969847	0.342672	0.287575	0.381549	0.879144	0.945054	0.694601	1.19958	1.07338	0.984669	1.0119	0.767603	0.79683	1.03683	0.658306
ivPZDVM,SZ	6.34802	6.7839	9.5598	4.86694	9.95096	8.22422	8.02832	7.41388	9.22475	7.80633	4.4384	4.53262	9.75491	6.81597	7.91315	8.68013	7.85318	5.80912	5.88816	1.68521	2.66212	2.70273	1.73914	2.42462	5.87312	2.77501	4.25922	5.40707	5.50414	7.2114	8.38528	5.72621	5.5488	7.28936	5.33737	8.79483	7.31667	6.77993	8.67669	8.55525	5.03632	8.31119	4.55998	6.44213	6.06414	6.79764	9.95129	5.8461	9.60115
ivPZDVM,LZ	3.4158	3.66399	5.8986	5.21608	5.39575	6.66746	5.40803	1.82042	3.05479	3.75045	4.73986	2.76157	4.55372	8.25851	5.78423	3.45049	2.72938	1.41303	1.25192	2.20314	3.66179	2.26743	2.08365	1.06878	1.23233	2.67182	2.35202	1.62331	2.54868	4.82942	4.56874	1.88673	1.3853	1.39442	1.48312	2.71094	2.95682	2.47951	2.40457	1.74108	1.52344	1.15692	1.02951	1.664	0.937638	1.10094	1.09237	1.18874	1.67694
AEPZDVM	0.749523	0.71375	0.701776	0.72565	0.694655	0.752684	0.729816	0.700759	0.713762	0.714695	0.731818	0.724575	0.653606	0.671313	0.71511	0.73719	0.719422	0.712864	0.73043	0.725235	0.752542	0.780354	0.793599	0.758946	0.754779	0.757686	0.759418	0.788482	0.797381	0.829278	0.85935	0.86508	0.843562	0.817834	0.767	0.80195	0.822747	0.841741	0.826129	0.808815	0.865775	0.868379	0.840509	0.857653	0.897764	0.867596	0.838246	0.836059	0.816312
actres,PZDVM	0.0484029	0.0582448	0.0586627	0.0547914	0.0593259	0.0436828	0.0248989	0.0420202	0.0269663	0.0264541	0.0243843	0.0272069	0.0229912	0.0176911	0.0127891	0.0138617	0.0123489	0.0132153	0.0154593	0.0189978	0.0182185	0.0137587	0.0111931	0.0138152	0.0224095	0.0142649	0.0141902	0.0133059	0.0130697	0.0150917	0.0212229	0.0142131	0.0119848	0.0105541	0.021299	0.0283876	0.0301642	0.0325345	0.058367	0.06834	0.0440618	0.0283276	0.0191454	0.0218511	0.0119933	0.0116004	0.0112208	0.0193002	0.0168061
mortday,PZDVM	0.11112	0.0225634	0.0111837	0.0405898	0.0048219	0.025533	0.0957878	0.0864896	0.175984	0.161018	0.195362	0.207854	0.126155	0.111752	0.119665	0.189407	0.212063	0.293488	0.240388	0.198548	0.243866	0.278145	0.309857	0.386162	0.359254	0.397487	0.452936	0.47418	0.487691	0.419714	0.404051	0.391686	0.292841	0.34927	0.283804	0.285159	0.333752	0.289066	0.350755	0.311609	0.332519	0.244112	0.322473	0.34978	0.3453	0.30884	0.334795	0.386487	0.382294
refnitr	0.00853289	0.00631661	0.00799104	0.00691309	0.00822049	0.00657442	0.00461578	0.00449118	0.00285915	0.00414325	0.00261432	0.00196411	0.00698126	0.00415515	0.00133937	0.00190439	0.00284363	0.00241508	0.00103925	0.00178658	0.00170596	0.0018354	0.00112694	0.00154935	0.0013824	0.00101577	0.00143207	0.0020573	0.00128939	0.00177889	0.00124952	0.00101443	0.00154909	0.00180686	0.00188461	0.00345422	0.00330432	0.0058948	0.00912952	0.00593812	0.0050469	0.014647	0.0119021	0.0103361	0.00399641	0.0196018	0.00989648	0.0149733	0.0122294
refdec,PON,NH	0.019539	0.0318284	0.0243627	0.0112628	0.0153368	0.00862428	0.0130563	0.0171736	0.0277329	0.019145	0.0192851	0.0130539	0.0112454	0.0123	0.00862437	0.00581429	0.00517746	0.00620615	0.0097158	0.00873649	0.00783735	0.0201594	0.017148	0.0103213	0.00632209	0.00632773	0.00703817	0.00616127	0.00796676	0.00581683	0.0107358	0.00845275	0.0088422	0.0101396	0.00895032	0.00551129	0.00524352	0.0083684	0.018581	0.016726	0.024189	0.01637	0.0343548	0.0467206	0.0376966	0.0480428	0.0434045	0.0302833	0.0452942
refdec,PON,DON	0.369405	0.164383	0.104861	0.263519	0.348052	0.218929	0.332748	0.28515	0.49065	0.298673	0.453362	0.495989	0.232129	0.224428	0.277814	0.248619	0.395418	0.405746	0.437802	0.296485	0.314657	0.466682	0.247557	0.415415	0.475929	0.417562	0.256563	0.158152	0.0602507	0.055487	0.0437285	0.0706675	0.0643225	0.133962	0.37105	0.351443	0.295543	0.473198	0.225565	0.194496	0.192399	0.21567	0.449073	0.330724	0.494708	0.436832	0.476873	0.441239	0.332548
refdec,LPON,DON	0.178837	0.101934	0.0822842	0.142336	0.0648834	0.046366	0.0780585	0.0464567	0.0489051	0.017991	0.0216462	0.0230053	0.0442575	0.0392972	0.0716971	0.0698735	0.050433	0.0925717	0.105076	0.0520316	0.0626229	0.0569313	0.0629627	0.0428886	0.0314611	0.0345464	0.0336625	0.0333115	0.0282879	0.0267582	0.0247232	0.0480112	0.0516653	0.0529279	0.0353907	0.0495024	0.0420899	0.042329	0.0576321	0.0322798	0.0482027	0.0499541	0.0191905	0.0215083	0.02166	0.0161567	0.0142534	0.0134629	0.00983095
refdec,LPON,NH	0.0249547	0.0242093	0.0215005	0.0280395	0.0371412	0.0121153	0.01686	0.0113473	0.00975501	0.00995457	0.00532354	0.00982462	0.00850136	0.0123599	0.00820936	0.0164106	0.0109045	0.0178767	0.0270767	0.047281	0.0778932	0.100357	0.220551	0.0643047	0.0318688	0.0201958	0.0996907	0.0396236	0.0242027	0.0358902	0.0280241	0.0137794	0.0103231	0.00587412	0.00724478	0.00857509	0.0125846	0.020201	0.020763	0.0421175	0.0586467	0.0438973	0.0366988	0.0269147	0.0151878	0.0103951	0.00642686	0.00902659	0.00676525
refdec,LPON,DON	0.347514	0.417826	0.389374	0.344636	0.249183	0.226571	0.182032	0.191224	0.102116	0.0860117	0.0972089	0.0923621	0.0728974	0.0465943	0.0504891	0.0413578	0.025322	0.0413965	0.0338874	0.0261322	0.0229169	0.0124005	0.0177465	0.0111622	0.0285629	0.0404665	0.0273887	0.0285114	0.0379846	0.0359606	0.0229683	0.0233906	0.0171073	0.0162554	0.00979008	0.00562633	0.00863317	0.0145854	0.013366	0.0145253	0.00683891	0.0129068	0.0125316	0.0093499	0.00578259	0.00661111	0.005651	0.00777653	0.00918324
refdec,DON,NH	0.00519745	0.00525801	0.00607428	0.00611154	0.0051952	0.00507699	0.00679968	0.00543425	0.00647425	0.00523977	0.00553784	0.00532983	0.00541604	0.00563158	0.00704443	0.00546497	0.00541232	0.00603624	0.00597022	0.00677984	0.00744143	0.00735507	0.00765371	0.00680134	0.00587989	0.00663313	0.00536296	0.00576624	0.00575333	0.00619189	0.00605082	0.00520763	0.00604175	0.00531463	0.00616347	0.0050351	0.00541723	0.00514262	0.00875878	0.00565508	0.0052159	0.00704758	0.00846987	0.00624975	0.00672527	0.00527959	0.0057263	0.00560661	0.0050354
fDON,DONref	0.244477	0.22852	0.216401	0.288838	0.186629	0.247081	0.245359	0.240351	0.282325	0.279585	0.288858	0.202786	0.238724	0.255674	0.294418	0.266173	0.188704	0.19205	0.199598	0.221286	0.0898167	0.28427	0.176461	0.258765	0.245495	0.273691	0.166556	0.24711	0.285869	0.264604	0.299995	0.0871223	0.102988	0.133831	0.259085	0.165915	0.158155	0.213762	0.282026	0.189565	0.259919	0.299064	0.209356	0.202763	0.245009	0.153912	0.29192	0.124896	0.141308
refdec,DONref,NH	1.84984e-05	1.20723e-05	1.94292e-05	9.73308e-06	9.92588e-06	1.38222e-05	4.89922e-06	3.27488e-06	1.69463e-06	1.78045e-06	2.29424e-06	2.34875e-06	1.7755e-06	7.57359e-06	7.66733e-06	1.29388e-05	1.08559e-05	5.66041e-06	4.32716e-06	2.49499e-06	1.4062e-06	1.42406e-06	1.3373e-06	2.80148e-06	2.71542e-06	2.18589e-06	1.81801e-06	1.71496e-06	1.94338e-06	1.08797e-06	2.68344e-06	1.25724e-06	1.47986e-06	2.28809e-06	1.25006e-06	1.36425e-06	2.34181e-06	1.65263e-06	1.2963e-06	1.24705e-06	1.8221e-06	1.02665e-06	1.35741e-06	1.20266e-06	1.05425e-06	3.93052e-06	2.48511e-06	4.57321e-06	5.65353e-06
refdec,OP,Si	0.0530131	0.0612916	0.0690733	0.0496559	0.0915688	0.0793065	0.0842234	0.0843205	0.0608031	0.0751682	0.096439	0.0966042	0.0498593	0.0819622	0.0827773	0.0942103	0.0780637	0.0750803	0.0940859	0.070034	0.0280964	0.0269846	0.0252532	0.0275238	0.0336667	0.0233195	0.0274163	0.0258793	0.0654507	0.0782549	0.0759431	0.0547478	0.0861716	0.0847603	0.0642519	0.0411033	0.0639772	0.076369	0.0682187	0.0455321	0.0695324	0.0930314	0.0991178	0.0849409	0.0489059	0.0624632	0.0814007	0.0734008	0.0597454
ref_dec_OP_SI	0.919195	0.549423	0.535603	0.591356	0.931558	1.09586	1.32693	0.91426	1.09037	1.28235	1.21797	1.06175	1.35316	1.44156	1.39917	1.12686	1.279	1.05643	1.1842	1.08349	0.631275	0.60056	0.519886	0.566631	0.592603	0.737223	0.632388	0.581386	0.547581	0.77344	0.71633	0.914699	0.745688	0.575542	0.69335	0.647286	1.08591	1.78351	1.46135	1.35391	1.21389	1.55274	1.21014	0.879157	0.889535	0.770931	0.581233	0.594584	0.765613
sink	11.1006	13.4066	10.1581	11.3843	10.3436	11.6527	11.624	10.135	10.7075	16.5683	10.7081	10.7463	17.4552	11.9982	11.2593	14.0873	14.8368	10.4129	13.5044	10.6181	21.4825	41.5415	72.2435	230.891	110.653	80.1638	91.3263	95.4634	95.632	132.273	247.881	209.091	147.727	64.8559	143.206	203.156	336.091	438.204	379.661	439.535	478.805	380.429	438.96	439.5	270.995	321.893	246.106	299.905	317.267
koxy,mic	63.2793	75.5641	54.5523	69.3949	75.6089	78.8098	73.8587	77.6883	93.6621	72.773	77.0123	69.2975	87.9565	99.5933	99.9028	70.0601	55.219	54.4669	52.3401	71.0835	88.7918	96.371	111.623	104.529	112.761	134.258	108.313	83.4148	70.7691	78.2193	73.7045	105.422	92.7403	88.962	110.044	122.8	125.11	128.681	140.46	136.977	162.925	146.151	165.795	170.266	171.776	154.285	149.143	147.603	136.231
koxy,met	36.1994	33.9716	36.1285	37.7785	39.7161	37.1862	38.7089	33.5699	34.793	35.8733	35.6206	30.0704	32.2119	31.474	33.0478	25.3886	22.3896	22.469	27.4404	26.4901	30.1334	31.092	25.4429	24.2742	25.0541	21.3544	17.84	13.712	20.5654	16.8004	20.6878	17.4072	17.4111	20.5041	20.6587	21.7041	21.4864	18.1728	13.9585	18.0513	17.4875	16.411	15.2376	14.2652	12.659	13.5761	10.6943	10.6383	6.51796
Chl2CSP,min	0.00957186	0.0087848	0.00813148	0.008571	0.009415	0.00940278	0.00936165	0.00925921	0.00941026	0.00823965	0.00911048	0.00759542	0.00864815	0.00785689	0.00801926	0.00932895	0.00944561	0.00865577	0.00765195	0.00903744	0.00795248	0.00768965	0.00869551	0.00961129	0.00878619	0.00852352	0.00893879	0.00865201	0.00813809	0.00883042	0.00877563	0.00853739	0.00892267	0.00958368	0.0080435	0.00782927	0.00874077	0.00791434	0.0090453	0.00990822	0.00931477	0.00867015	0.00866577	0.0097276	0.00886136	0.008505	0.00774083	0.00873543	0.00947598
Chl2CLP,min	0.00767703	0.0077684	0.00813804	0.00865102	0.00869522	0.00768897	0.00835636	0.00992882	0.00755756	0.00654779	0.00619059	0.00572178	0.00529676	0.00484266	0.00443203	0.00514425	0.00526086	0.00545714	0.00712216	0.00709393	0.00827592	0.00846583	0.00751284	0.00644112	0.00778656	0.00834545	0.00878088	0.00972742	0.0098903	0.00897669	0.00969073	0.00927361	0.00972732	0.00986106	0.0094977	0.00893875	0.00879399	0.00758849	0.005683	0.00561689	0.00661715	0.00476779	0.00345195	0.00263231	0.00162011	0.00236198	0.00122102	0.00219831	0.00184586
Chl2CSP,max	0.00743842	0.00822694	0.00748891	0.00727279	0.00550074	0.00970616	0.00526	0.00720625	0.00934782	0.0055565	0.00609249	0.00770053	0.00942541	0.00731874	0.00985087	0.00537717	0.00952265	0.00837425	0.00765042	0.0121518	0.00727099	0.00686491	0.00926453	0.00594578	0.00521541	0.00591013	0.0111132	0.0102905	0.00517325	0.00647201	0.00578707	0.00572429	0.0113122	0.00895589	0.00591301	0.00672958	0.00618495	0.00828095	0.00756238	0.00748662	0.00562849	0.00542347	0.00742711	0.00888531	0.00510244	0.00729037	0.00542326	0.00902747	0.0089075
Chl2CLP,max	0.192123	0.196395	0.189461	0.191348	0.194883	0.191583	0.15998	0.165542	0.168917	0.171252	0.180071	0.16214	0.199581	0.183532	0.187914	0.194612	0.190382	0.193744	0.170647	0.194857	0.196899	0.173781	0.184939	0.18986	0.196763	0.186922	0.196671	0.189615	0.178913	0.183272	0.198733	0.16754	0.157113	0.163203	0.15573	0.150804	0.172168	0.198127	0.188492	0.169589	0.185247	0.17339	0.154841	0.160406	0.176044	0.181175	0.185344	0.194881	0.194005
extchl	0.0563527	0.0570262	0.0598408	0.0575926	0.0578882	0.0591262	0.058799	0.0535794	0.0536656	0.0529411	0.0521342	0.0515949	0.0524451	0.0497377	0.0510445	0.0511787	0.0482201	0.0508241	0.0502801	0.0520851	0.0495064	0.0479662	0.0468488	0.0475985	0.048621	0.050556	0.0503462	0.05139	0.0548894	0.0575602	0.05705	0.0588746	0.0578606	0.0575605	0.0598566	0.0570238	0.0558754	0.0572983	0.0564918	0.0575675	0.0587647	0.0597029	0.0590982	0.0555562	0.0543756	0.0556068	0.0578403	0.0576191	0.0560352
[truncated: 951 more columns]
