# Supplementary material for: Quantifying biological carbon pump pathways with a data-constrained mechanistic model ensemble approach
Source: Copernicus journal article supplement (doi:10.5194/bg-2022-7), 2022-02-07
Supplement: Supplementary file 6 [file Supp Table 6.xlsx]

## Sheet: Sheet1
	Vmax,SP	kNO,SP	kNH,SP	αSP	βSP	ResSP	MortSP	ExcSP	InhNH,NO,SP	Vmax,LP	kNO,LP	kNH,LP	kSI,LP	αLP	βLP	ResLP	MortLP	ExcLP	InhNH,NO,LP	gmax,SZ,SP	gmax,SZ,LP	ivSZ,SP	ivSZ,LP	threshSZ,SP	threshSZ,LP	mortSZ	AESZ	GGESZ	gmax,LZRES,SP	gmax,LZRES,LP	gmax,LZRES,SZ	ivLZRES,SP	ivLZRES,LP	ivLZRES,SZ	AELZRES	actres,LZRES	mortday,LZRES	threshLZRES,SP	threshLZRES,LP	threshLZRES,SZ	mortnight,LZ	Ika2	IkLZ	gmax,LZDVM,SP	gmax,LZDVM,LP	gmax,LZDVM,SZ	ivLZDVM,SP	ivLZDVM,LP	ivLZDVM,SZ
Vmax,SP	1	0.0318407	-0.00385209	-0.14843	0.459276	0.0595285	0.249493	0.0134539	0.431139	0.606177	-0.0122639	-0.0217344	-0.0166272	0.175	-0.206244	-0.0471278	-0.2435	-0.104032	-0.0722746	0.15356	0.20227	0.121309	0.135199	0.0945888	-0.151917	-0.193819	0.260905	-0.0528939	0.15416	0.0719291	0.276277	0.160758	-0.137298	-0.0343736	-0.395442	0.107259	0.027173	-0.00381054	-0.119988	-0.255053	0.00702312	-4.04527e-16	0.101688	0.276318	-0.0325392	-0.14505	0.110728	0.00156211	0.11859
kNO,SP	0.0318407	1	0.0643011	-0.0491607	0.0574598	-0.0913396	-0.158107	-0.00831587	0.245871	0.140518	0.437706	0.0265818	-0.035572	0.232514	0.137507	0.201475	-0.0448089	-0.0753757	0.116779	-0.0866606	0.246556	0.0771886	-0.148782	0.129761	0.180833	0.263023	-0.205088	-0.214385	-0.0742502	0.22779	0.0234442	0.0141811	-0.0772447	0.139668	-0.082813	-0.0712822	-0.152353	0.0803703	0.0903031	-0.0118661	-0.0426924	1.23135e-16	0.0775534	0.0947968	0.0692169	-0.0529748	-0.203971	-0.32287	0.137004
kNH,SP	-0.00385209	0.0643011	1	-0.0570585	-0.0254896	-0.000861389	0.223939	0.0380932	0.0398557	0.00935473	0.0755951	0.887869	0.179553	0.102813	0.251739	0.171665	-0.00572615	-0.149528	0.224426	-0.0903996	0.138876	-0.069774	0.0593176	-0.10341	0.186972	0.0503424	0.188127	0.0459263	-0.0279063	-0.101166	0.0681149	0.0264883	-0.0693653	-0.0611109	-0.0240572	-0.0479004	-0.0491491	-0.180601	-0.218712	-0.382729	-0.284606	1.73812e-16	0.113036	0.144509	0.0592589	-0.148206	0.00999663	-0.0854709	0.0129606
αSP	-0.14843	-0.0491607	-0.0570585	1	-0.114965	0.109509	0.109557	0.0684294	-0.0420579	-0.168369	-0.0830875	-0.0150904	-0.0305056	0.0807694	0.0447778	-0.0301581	0.0829686	0.022296	0.000643959	0.0250216	-0.0102989	0.00936277	-0.141091	-0.0448866	0.0143685	-0.0240296	-0.077456	0.0635242	0.0678286	-0.0428223	0.0137846	0.0218084	-0.0953046	0.0324366	0.0596229	-0.0370523	0.0674536	0.0771627	0.000231542	-0.0813005	0.0319747	-4.32935e-15	0.0396535	-0.00517269	0.0391571	-0.0720594	0.0114156	0.118021	-0.0202688
βSP	0.459276	0.0574598	-0.0254896	-0.114965	1	0.0208326	-0.108814	-0.0123481	0.095881	0.277066	0.291472	-0.0494281	-0.0727052	0.296453	0.0845494	0.0739841	-0.168389	0.00957696	-0.0212501	0.118653	0.107278	-0.0396728	0.0958754	0.025496	-0.0292423	0.0200768	0.148926	0.00492468	0.037186	0.150122	0.155548	0.0403271	-0.0690338	-0.0124375	-0.138335	-0.0748206	-0.283098	-0.0435183	0.0325476	-0.0930764	0.0397716	-6.5099e-17	0.0278594	0.183557	0.0238728	0.0327858	0.0783642	-0.122443	0.00895878
ResSP	0.0595285	-0.0913396	-0.000861389	0.109509	0.0208326	1	0.0429279	-0.0582405	-0.048617	0.057494	-0.0645952	0.0424421	0.0378802	-0.0357133	-0.00392636	0.0820499	-0.0456388	0.0751185	0.0332456	0.090281	0.0210116	-0.0881947	0.0737048	-0.0719057	-0.0495996	-0.187685	0.115882	0.0516471	0.0321118	-0.104617	0.119208	-0.0593581	-0.022126	0.0401201	-0.0675464	0.025316	-0.0101746	0.0292856	-0.174293	-0.0696525	-0.109999	-1.59955e-16	-0.0626928	0.0167349	-0.039367	-0.0769794	0.0645429	0.0584765	0.0337022
MortSP	0.249493	-0.158107	0.223939	0.109557	-0.108814	0.0429279	1	-0.0558773	0.191164	0.159174	-0.253434	0.276968	0.127916	-0.13769	-0.072531	-0.0164342	-0.11463	-0.128327	-0.0615004	0.163648	0.0888835	-0.268831	0.128129	0.0895032	-0.0767059	-0.42641	0.486011	0.0270319	0.0441105	-0.241364	0.36977	0.21147	-0.0807052	0.101222	-0.394036	0.0133038	0.104021	0.221285	-0.177612	-0.411128	-0.130293	-4.91517e-16	0.021196	0.2455	0.0412021	-0.327694	0.219147	0.276814	-0.0348546
ExcSP	0.0134539	-0.00831587	0.0380932	0.0684294	-0.0123481	-0.0582405	-0.0558773	1	0.0908041	-0.108778	0.0671321	0.0272598	0.0122703	-0.00368311	-0.0362348	0.0812233	-0.0383951	-0.0904047	-0.106789	0.108634	0.0416797	-0.0681001	0.0413751	0.0753762	0.0541064	0.065537	0.0571486	-0.0248699	-0.00424887	-0.0195015	0.0633653	0.0429897	0.0282383	-0.0715809	-0.00633228	-0.0576923	-0.0642572	0.0728822	0.0503313	-0.0799298	-0.113309	-1.12574e-17	0.0950335	-0.0659974	0.0911633	0.0185872	0.10072	-0.0825286	-0.00813907
InhNH,NO,SP	0.431139	0.245871	0.0398557	-0.0420579	0.095881	-0.048617	0.191164	0.0908041	1	0.369765	0.124999	0.0470243	0.00275954	0.265591	-0.111087	0.184672	-0.161567	-0.12154	-0.0354437	0.0270354	0.334873	0.0533697	0.0185109	0.224287	-0.135086	-0.0477242	0.0605441	-0.0116198	0.115251	0.0863684	0.245912	0.291641	-0.0562113	-0.0181542	-0.294495	-0.120546	0.0571431	0.0948009	0.0685291	-0.229343	0.00750483	-4.27847e-16	0.400106	0.244423	-0.031809	-0.178721	0.10589	-0.169142	0.374279
Vmax,LP	0.606177	0.140518	0.00935473	-0.168369	0.277066	0.057494	0.159174	-0.108778	0.369765	1	0.183617	0.0469611	0.14622	0.270068	0.107459	-0.0270885	-0.171809	0.0354984	0.0272243	0.11434	0.354137	0.107702	-0.038967	0.131621	0.00576887	-0.167914	0.204875	-0.161741	0.225086	0.0364051	0.208456	-0.0481743	-0.0812672	-0.0702225	-0.35547	0.131937	-0.0780612	-0.0955788	-0.183117	-0.238323	-0.0356809	-1.86102e-15	0.124535	0.218947	0.00201539	-0.148815	0.0363882	-0.172863	0.213416
kNO,LP	-0.0122639	0.437706	0.0755951	-0.0830875	0.291472	-0.0645952	-0.253434	0.0671321	0.124999	0.183617	1	0.0623158	-0.0304382	0.272214	0.152775	0.222192	-0.0721136	0.0155217	0.181981	-0.106451	0.0620147	0.193123	-0.0881576	0.147879	0.107124	0.193546	-0.19981	-0.0874698	0.0663026	0.21072	-0.0694617	-0.0348678	-0.0152931	-0.0398669	-0.0983616	-0.140439	-0.0530465	-0.097393	0.132845	0.0554463	0.0735358	-5.333e-16	0.161283	0.161542	0.0709067	0.134081	-0.078328	-0.279473	0.130103
kNH,LP	-0.0217344	0.0265818	0.887869	-0.0150904	-0.0494281	0.0424421	0.276968	0.0272598	0.0470243	0.0469611	0.0623158	1	0.194023	0.121586	0.25609	0.149789	0.00975855	-0.101709	0.20574	-0.105625	0.131744	-0.0698077	0.0593898	-0.0864797	0.135423	-0.0286636	0.204338	0.060357	0.0611033	-0.139758	0.0766113	0.0251931	-0.0408907	-0.0823017	-0.0573616	-0.0439025	-0.0212126	-0.163	-0.222856	-0.403045	-0.25711	-6.69807e-16	0.174189	0.138905	0.0736422	-0.180206	0.0445997	-0.0504994	0.0292884
kSI,LP	-0.0166272	-0.035572	0.179553	-0.0305056	-0.0727052	0.0378802	0.127916	0.0122703	0.00275954	0.14622	-0.0304382	0.194023	1	-0.00152042	0.167409	-0.0710144	0.0155323	-0.0210277	0.0498582	0.106151	0.0384789	-0.123414	0.0718985	0.0173623	0.0332047	-0.0449649	0.214695	-0.0724602	0.0123745	-0.108415	0.0293289	-0.0751719	0.0597337	-0.0881467	-0.00852319	0.0779331	-0.0796542	0.0148518	-0.0384151	-0.112135	-0.183973	7.15711e-16	-0.028459	-0.0578359	0.0419475	0.00123119	0.0171064	-0.0748673	-0.0331088
αLP	0.175	0.232514	0.102813	0.0807694	0.296453	-0.0357133	-0.13769	-0.00368311	0.265591	0.270068	0.272214	0.121586	-0.00152042	1	-0.0493557	0.254155	-0.104961	0.150301	0.143529	-0.173097	0.0796134	0.0302267	0.233405	-0.0305754	-0.0933012	-0.010171	-0.00864159	-0.103376	0.0896668	0.0312023	0.129235	0.0693366	0.017205	-0.0596844	-0.192613	-0.0537761	-0.148398	-0.0845378	-0.0143453	-0.0498346	-0.115513	-1.45126e-15	0.291718	0.0527003	0.00617154	0.00432322	0.0418073	-0.279677	0.149631
βLP	-0.206244	0.137507	0.251739	0.0447778	0.0845494	-0.00392636	-0.072531	-0.0362348	-0.111087	0.107459	0.152775	0.25609	0.167409	-0.0493557	1	0.119751	-0.0309478	-0.140717	0.125822	0.159876	0.0946734	-0.126578	-0.155126	0.0317649	0.26166	0.209979	-0.0755767	-0.124142	-0.106316	0.113661	-0.207829	-0.0173338	0.000776941	-0.0579657	0.21909	-0.140683	-0.129669	-0.0338489	0.034558	-0.0586804	-0.160183	4.19216e-16	0.0676258	-0.0585091	-0.0605798	-0.000893162	-0.0688447	-0.0951889	-0.0307091
ResLP	-0.0471278	0.201475	0.171665	-0.0301581	0.0739841	0.0820499	-0.0164342	0.0812233	0.184672	-0.0270885	0.222192	0.149789	-0.0710144	0.254155	0.119751	1	-0.131874	-0.0514301	-0.0833831	-0.140362	-0.0414337	-0.0217436	-0.0231219	-0.109383	0.142862	0.189594	-0.183885	0.229299	0.110072	0.103192	0.0253293	0.188569	-0.0571134	-0.0116013	-0.0346854	-0.24149	-0.17945	-0.165865	-0.00607477	0.0573319	-0.067181	8.02086e-16	0.334691	0.16842	0.00387879	-0.0411889	-0.0245807	-0.106162	0.182983
MortLP	-0.2435	-0.0448089	-0.00572615	0.0829686	-0.168389	-0.0456388	-0.11463	-0.0383951	-0.161567	-0.171809	-0.0721136	0.00975855	0.0155323	-0.104961	-0.0309478	-0.131874	1	0.0475722	-0.0517837	-0.128408	-0.199777	0.106959	-0.00586786	-0.146032	0.113161	0.130515	-0.0713667	0.0860425	-0.063412	-0.119649	-0.0038509	-0.0527554	0.0974853	-0.0421494	0.197821	0.0423801	0.146963	0.0451734	0.00670178	0.135068	0.112168	1.30102e-16	-0.118843	-0.193682	-0.0295233	0.083102	-0.133053	-0.0378723	-0.0590634
ExcLP	-0.104032	-0.0753757	-0.149528	0.022296	0.00957696	0.0751185	-0.128327	-0.0904047	-0.12154	0.0354984	0.0155217	-0.101709	-0.0210277	0.150301	-0.140717	-0.0514301	0.0475722	1	-0.0643482	-0.263468	-0.162845	0.12327	0.118198	-0.299317	-0.109908	-0.0640471	-0.117115	-0.0152745	0.269496	0.109814	-0.103744	-0.128039	0.0477369	-0.0253319	0.0326758	0.0686837	0.116816	-0.0150985	0.191117	0.119881	0.0640721	2.65287e-16	0.0723734	0.010791	0.237242	0.0474957	0.0171317	-0.169673	0.101379
InhNH,NO,LP	-0.0722746	0.116779	0.224426	0.000643959	-0.0212501	0.0332456	-0.0615004	-0.106789	-0.0354437	0.0272243	0.181981	0.20574	0.0498582	0.143529	0.125822	-0.0833831	-0.0517837	-0.0643482	1	-0.10606	-0.0662888	0.0399412	0.0722814	0.142921	-0.0367621	-0.11945	-0.0568947	-0.16386	0.108824	-0.103913	-0.169393	-0.162715	-0.0348819	0.0824715	-0.00691426	0.146239	-0.0493668	-0.262576	-0.144622	-0.0396132	-0.111568	1.63027e-15	0.0852084	-0.0206737	-0.0582954	0.0776756	-0.000198989	-0.136323	0.0682082
gmax,SZ,SP	0.15356	-0.0866606	-0.0903996	0.0250216	0.118653	0.090281	0.163648	0.108634	0.0270354	0.11434	-0.106451	-0.105625	0.106151	-0.173097	0.159876	-0.140362	-0.128408	-0.263468	-0.10606	1	0.344923	-0.361146	-0.0913202	0.146064	-0.0611574	0.0815244	0.295312	-0.14107	-0.178268	-0.0124654	0.207471	-0.0224104	-0.202502	-0.0546575	-0.0633356	0.0355754	-0.107852	0.138097	-0.0455158	-0.27311	-0.19001	-5.07644e-17	-0.142547	-0.0665206	-0.154407	-0.0196167	-0.0547789	0.295769	-0.185664
gmax,SZ,LP	0.20227	0.246556	0.138876	-0.0102989	0.107278	0.0210116	0.0888835	0.0416797	0.334873	0.354137	0.0620147	0.131744	0.0384789	0.0796134	0.0946734	-0.0414337	-0.199777	-0.162845	-0.0662888	0.344923	1	0.0678899	-0.551696	0.259382	-0.0890696	0.0966966	0.212486	-0.0418971	0.0112418	0.137577	0.0856645	0.0518152	-0.244311	0.155726	-0.0959973	0.195296	-0.146739	0.00635227	-0.185713	-0.361524	-0.0103802	-7.37063e-17	0.0462432	0.154482	0.0516123	-0.288577	-0.0550853	-0.0385119	0.219799
ivSZ,SP	0.121309	0.0771886	-0.069774	0.00936277	-0.0396728	-0.0881947	-0.268831	-0.0681001	0.0533697	0.107702	0.193123	-0.0698077	-0.123414	0.0302267	-0.126578	-0.0217436	0.106959	0.12327	0.0399412	-0.361146	0.0678899	1	-0.0574569	0.0791681	0.00845995	0.25119	-0.27683	-0.0397053	0.00608797	0.152604	-0.356785	0.0804079	0.120749	0.0262395	0.11382	0.223481	0.246709	-0.205451	0.052603	0.229247	0.363442	7.22179e-16	-0.0727817	0.00306214	0.0867332	0.0523083	-0.132496	-0.190859	0.0819042
ivSZ,LP	0.135199	-0.148782	0.0593176	-0.141091	0.0958754	0.0737048	0.128129	0.0413751	0.0185109	-0.038967	-0.0881576	0.0593898	0.0718985	0.233405	-0.155126	-0.0231219	-0.00586786	0.118198	0.0722814	-0.0913202	-0.551696	-0.0574569	1	-0.176442	0.00195058	-0.0749512	0.12064	-0.143064	-0.0605767	-0.140413	0.0731708	0.0710084	0.192664	-0.120249	-0.13522	-0.0324795	0.0713954	0.0157882	0.0797105	0.0377705	-0.154959	-1.40139e-15	0.00871728	-0.0517407	0.0279816	0.123083	0.153391	-0.0886648	-0.139757
threshSZ,SP	0.0945888	0.129761	-0.10341	-0.0448866	0.025496	-0.0719057	0.0895032	0.0753762	0.224287	0.131621	0.147879	-0.0864797	0.0173623	-0.0305754	0.0317649	-0.109383	-0.146032	-0.299317	0.142921	0.146064	0.259382	0.0791681	-0.176442	1	0.0510872	-0.00102214	0.0952132	-0.111326	-0.094892	0.0542821	-0.0389839	0.201752	-0.0284427	0.15298	-0.0858448	0.0704794	-0.226052	0.109631	0.0252157	0.00459214	0.127842	-5.39557e-16	0.0404215	0.0825046	0.000634094	-0.135911	0.0832454	0.0285842	0.126191
threshSZ,LP	-0.151917	0.180833	0.186972	0.0143685	-0.0292423	-0.0495996	-0.0767059	0.0541064	-0.135086	0.00576887	0.107124	0.135423	0.0332047	-0.0933012	0.26166	0.142862	0.113161	-0.109908	-0.0367621	-0.0611574	-0.0890696	0.00845995	0.00195058	0.0510872	1	0.174363	-0.0750524	-0.0938195	-0.167743	0.0452347	-0.0527385	0.00211838	-0.0410001	0.10211	0.0783878	-0.108947	-0.19247	-0.0294146	0.00206288	0.0731311	0.0555853	4.77189e-16	-0.0958533	-0.0744538	0.0613576	-0.142899	-0.0698502	-0.0847218	0.0500943
mortSZ	-0.193819	0.263023	0.0503424	-0.0240296	0.0200768	-0.187685	-0.42641	0.065537	-0.0477242	-0.167914	0.193546	-0.0286636	-0.0449649	-0.010171	0.209979	0.189594	0.130515	-0.0640471	-0.11945	0.0815244	0.0966966	0.25119	-0.0749512	-0.00102214	0.174363	1	-0.312771	2.39582e-05	-0.271769	0.368434	-0.343518	0.0443332	-0.112967	0.0194401	0.434937	-0.0473971	-0.142705	0.0486677	0.359251	0.125752	0.15554	4.72704e-17	-0.0399119	-0.0857376	0.197047	0.0619831	-0.307325	-0.184199	-0.0278311
AESZ	0.260905	-0.205088	0.188127	-0.077456	0.148926	0.115882	0.486011	0.0571486	0.0605441	0.204875	-0.19981	0.204338	0.214695	-0.00864159	-0.0755767	-0.183885	-0.0713667	-0.117115	-0.0568947	0.295312	0.212486	-0.27683	0.12064	0.0952132	-0.0750524	-0.312771	1	-0.0154571	-0.00104042	-0.219248	0.377628	0.0164932	-0.023276	-3.92042e-05	-0.318835	0.120794	-0.0820911	0.154431	-0.155505	-0.357419	-0.244517	-4.88474e-15	-0.127426	0.115159	-0.00374257	-0.213293	0.235609	0.125602	-0.12802
GGESZ	-0.0528939	-0.214385	0.0459263	0.0635242	0.00492468	0.0516471	0.0270319	-0.0248699	-0.0116198	-0.161741	-0.0874698	0.060357	-0.0724602	-0.103376	-0.124142	0.229299	0.0860425	-0.0152745	-0.16386	-0.14107	-0.0418971	-0.0397053	-0.143064	-0.111326	-0.0938195	2.39582e-05	-0.0154571	1	0.216466	0.0827036	0.13283	0.19537	-0.144816	0.129287	-0.0575929	-0.184295	0.054264	-0.148394	-0.0514205	0.0238191	-0.00387852	5.05174e-15	0.261061	0.137188	0.0976909	-0.10544	0.151802	0.174825	0.177191
gmax,LZRES,SP	0.15416	-0.0742502	-0.0279063	0.0678286	0.037186	0.0321118	0.0441105	-0.00424887	0.115251	0.225086	0.0663026	0.0611033	0.0123745	0.0896668	-0.106316	0.110072	-0.063412	0.269496	0.108824	-0.178268	0.0112418	0.00608797	-0.0605767	-0.094892	-0.167743	-0.271769	-0.00104042	0.216466	1	0.00334273	0.168634	-0.325993	-0.0997192	-0.0110305	-0.354463	0.0564766	0.124906	-0.219808	-0.211367	-0.0430684	0.0910975	-1.34247e-16	0.486502	0.223278	0.0528995	-0.0451579	0.133734	0.068576	0.343914
gmax,LZRES,LP	0.0719291	0.22779	-0.101166	-0.0428223	0.150122	-0.104617	-0.241364	-0.0195015	0.0863684	0.0364051	0.21072	-0.139758	-0.108415	0.0312023	0.113661	0.103192	-0.119649	0.109814	-0.103913	-0.0124654	0.137577	0.152604	-0.140413	0.0542821	0.0452347	0.368434	-0.219248	0.0827036	0.00334273	1	-0.254723	0.121696	-0.185021	-0.0886365	0.0664737	0.0373734	-0.0559122	-0.0224322	0.348273	0.0234105	0.186546	-1.8688e-16	0.116663	0.0793005	0.193422	0.146537	-0.12292	-0.109808	0.116585
gmax,LZRES,SZ	0.276277	0.0234442	0.0681149	0.0137846	0.155548	0.119208	0.36977	0.0633653	0.245912	0.208456	-0.0694617	0.0766113	0.0293289	0.129235	-0.207829	0.0253293	-0.0038509	-0.103744	-0.169393	0.207471	0.0856645	-0.356785	0.0731708	-0.0389839	-0.0527385	-0.343518	0.377628	0.13283	0.168634	-0.254723	1	0.0177922	-0.111253	-0.072039	-0.615644	-0.256662	0.0267819	0.164173	-0.21765	-0.261671	-0.301776	6.71535e-16	0.0284796	0.112039	-0.237303	-0.0995158	0.0637589	0.15017	-0.00926572
ivLZRES,SP	0.160758	0.0141811	0.0264883	0.0218084	0.0403271	-0.0593581	0.21147	0.0429897	0.291641	-0.0481743	-0.0348678	0.0251931	-0.0751719	0.0693366	-0.0173338	0.188569	-0.0527554	-0.128039	-0.162715	-0.0224104	0.0518152	0.0804079	0.0710084	0.201752	0.00211838	0.0443332	0.0164932	0.19537	-0.325993	0.121696	0.0177922	1	-0.0677659	0.17401	-0.0888983	-0.0950137	0.029387	0.147911	0.0991053	-0.117766	0.11256	6.58387e-16	0.231628	0.162832	0.0515457	-0.19007	0.105589	0.00390039	0.078358
ivLZRES,LP	-0.137298	-0.0772447	-0.0693653	-0.0953046	-0.0690338	-0.022126	-0.0807052	0.0282383	-0.0562113	-0.0812672	-0.0152931	-0.0408907	0.0597337	0.017205	0.000776941	-0.0571134	0.0974853	0.0477369	-0.0348819	-0.202502	-0.244311	0.120749	0.192664	-0.0284427	-0.0410001	-0.112967	-0.023276	-0.144816	-0.0997192	-0.185021	-0.111253	-0.0677659	1	-0.190175	0.0402312	0.116415	0.0920599	-0.179102	0.0746318	0.308131	-0.202778	4.19235e-16	-0.112633	-0.192285	-0.13174	0.32281	0.00207231	-0.14652	-0.206936
ivLZRES,SZ	-0.0343736	0.139668	-0.0611109	0.0324366	-0.0124375	0.0401201	0.101222	-0.0715809	-0.0181542	-0.0702225	-0.0398669	-0.0823017	-0.0881467	-0.0596844	-0.0579657	-0.0116013	-0.0421494	-0.0253319	0.0824715	-0.0546575	0.155726	0.0262395	-0.120249	0.15298	0.10211	0.0194401	-3.92042e-05	0.129287	-0.0110305	-0.0886365	-0.072039	0.17401	-0.190175	1	-0.0717739	0.0877401	-0.135276	0.147762	-0.0561352	0.141521	0.194956	-7.90752e-17	-0.0498415	0.0267842	0.165384	-0.389073	0.0740348	-0.0256178	0.249492
AELZRES	-0.395442	-0.082813	-0.0240572	0.0596229	-0.138335	-0.0675464	-0.394036	-0.00633228	-0.294495	-0.35547	-0.0983616	-0.0573616	-0.00852319	-0.192613	0.21909	-0.0346854	0.197821	0.0326758	-0.00691426	-0.0633356	-0.0959973	0.11382	-0.13522	-0.0858448	0.0783878	0.434937	-0.318835	-0.0575929	-0.354463	0.0664737	-0.615644	-0.0888983	0.0402312	-0.0717739	1	0.153889	-0.130752	-0.0200895	0.149267	0.230861	0.198946	2.49004e-15	-0.146421	-0.22405	0.122315	0.0611429	-0.206475	-0.0118376	-0.148432
actres,LZRES	0.107259	-0.0712822	-0.0479004	-0.0370523	-0.0748206	0.025316	0.0133038	-0.0576923	-0.120546	0.131937	-0.140439	-0.0439025	0.0779331	-0.0537761	-0.140683	-0.24149	0.0423801	0.0686837	0.146239	0.0355754	0.195296	0.223481	-0.0324795	0.0704794	-0.108947	-0.0473971	0.120794	-0.184295	0.0564766	0.0373734	-0.256662	-0.0950137	0.116415	0.0877401	0.153889	1	-0.0161989	-0.255888	-0.20058	-0.0991504	0.0805578	-1.08538e-15	-0.170224	-0.110533	0.0336091	-0.0456027	-0.054612	0.0160438	-0.0255619
mortday,LZRES	0.027173	-0.152353	-0.0491491	0.0674536	-0.283098	-0.0101746	0.104021	-0.0642572	0.0571431	-0.0780612	-0.0530465	-0.0212126	-0.0796542	-0.148398	-0.129669	-0.17945	0.146963	0.116816	-0.0493668	-0.107852	-0.146739	0.246709	0.0713954	-0.226052	-0.19247	-0.142705	-0.0820911	0.054264	0.124906	-0.0559122	0.0267819	0.029387	0.0920599	-0.135276	-0.130752	-0.0161989	1	0.0209792	0.0472169	-0.0044039	0.0538172	-1.04719e-16	0.0354497	0.123907	-0.225699	0.0607444	-0.0918924	0.188478	-0.17631
threshLZRES,SP	-0.00381054	0.0803703	-0.180601	0.0771627	-0.0435183	0.0292856	0.221285	0.0728822	0.0948009	-0.0955788	-0.097393	-0.163	0.0148518	-0.0845378	-0.0338489	-0.165865	0.0451734	-0.0150985	-0.262576	0.138097	0.00635227	-0.205451	0.0157882	0.109631	-0.0294146	0.0486677	0.154431	-0.148394	-0.219808	-0.0224322	0.164173	0.147911	-0.179102	0.147762	-0.0200895	-0.255888	0.0209792	1	0.255796	-0.0857533	0.0802961	-3.05303e-16	-0.155148	0.035701	0.197423	-0.235742	0.132508	-0.00828272	-0.110187
threshLZRES,LP	-0.119988	0.0903031	-0.218712	0.000231542	0.0325476	-0.174293	-0.177612	0.0503313	0.0685291	-0.183117	0.132845	-0.222856	-0.0384151	-0.0143453	0.034558	-0.00607477	0.00670178	0.191117	-0.144622	-0.0455158	-0.185713	0.052603	0.0797105	0.0252157	0.00206288	0.359251	-0.155505	-0.0514205	-0.211367	0.348273	-0.21765	0.0991053	0.0746318	-0.0561352	0.149267	-0.20058	0.0472169	0.255796	1	0.14833	0.146262	-9.1105e-16	-0.137668	-0.0309679	0.247913	0.0773342	0.0187947	-0.184332	-0.138293
threshLZRES,SZ	-0.255053	-0.0118661	-0.382729	-0.0813005	-0.0930764	-0.0696525	-0.411128	-0.0799298	-0.229343	-0.238323	0.0554463	-0.403045	-0.112135	-0.0498346	-0.0586804	0.0573319	0.135068	0.119881	-0.0396132	-0.27311	-0.361524	0.229247	0.0377705	0.00459214	0.0731311	0.125752	-0.357419	0.0238191	-0.0430684	0.0234105	-0.261671	-0.117766	0.308131	0.141521	0.230861	-0.0991504	-0.0044039	-0.0857533	0.14833	1	0.132259	-2.075e-15	-0.179247	-0.279449	-0.0554163	0.361223	-0.135806	-0.135309	0.0555517
mortnight,LZ	0.00702312	-0.0426924	-0.284606	0.0319747	0.0397716	-0.109999	-0.130293	-0.113309	0.00750483	-0.0356809	0.0735358	-0.25711	-0.183973	-0.115513	-0.160183	-0.067181	0.112168	0.0640721	-0.111568	-0.19001	-0.0103802	0.363442	-0.154959	0.127842	0.0555853	0.15554	-0.244517	-0.00387852	0.0910975	0.186546	-0.301776	0.11256	-0.202778	0.194956	0.198946	0.0805578	0.0538172	0.0802961	0.146262	0.132259	1	-9.91529e-16	-0.00252814	0.160769	0.239155	-0.20107	-0.000880349	0.0370862	0.0970801
Ika2	-4.04527e-16	1.23135e-16	1.73812e-16	-4.32935e-15	-6.5099e-17	-1.59955e-16	-4.91517e-16	-1.12574e-17	-4.27847e-16	-1.86102e-15	-5.333e-16	-6.69807e-16	7.15711e-16	-1.45126e-15	4.19216e-16	8.02086e-16	1.30102e-16	2.65287e-16	1.63027e-15	-5.07644e-17	-7.37063e-17	7.22179e-16	-1.40139e-15	-5.39557e-16	4.77189e-16	4.72704e-17	-4.88474e-15	5.05174e-15	-1.34247e-16	-1.8688e-16	6.71535e-16	6.58387e-16	4.19235e-16	-7.90752e-17	2.49004e-15	-1.08538e-15	-1.04719e-16	-3.05303e-16	-9.1105e-16	-2.075e-15	-9.91529e-16	1	-5.7562e-16	-1.24926e-15	-1.73355e-16	1.15908e-15	1.50936e-16	-8.18953e-17	-1.93618e-16
IkLZ	0.101688	0.0775534	0.113036	0.0396535	0.0278594	-0.0626928	0.021196	0.0950335	0.400106	0.124535	0.161283	0.174189	-0.028459	0.291718	0.0676258	0.334691	-0.118843	0.0723734	0.0852084	-0.142547	0.0462432	-0.0727817	0.00871728	0.0404215	-0.0958533	-0.0399119	-0.127426	0.261061	0.486502	0.116663	0.0284796	0.231628	-0.112633	-0.0498415	-0.146421	-0.170224	0.0354497	-0.155148	-0.137668	-0.179247	-0.00252814	-5.7562e-16	1	0.353423	0.138814	-0.173834	0.175949	-0.0530446	0.358542
gmax,LZDVM,SP	0.276318	0.0947968	0.144509	-0.00517269	0.183557	0.0167349	0.2455	-0.0659974	0.244423	0.218947	0.161542	0.138905	-0.0578359	0.0527003	-0.0585091	0.16842	-0.193682	0.010791	-0.0206737	-0.0665206	0.154482	0.00306214	-0.0517407	0.0825046	-0.0744538	-0.0857376	0.115159	0.137188	0.223278	0.0793005	0.112039	0.162832	-0.192285	0.0267842	-0.22405	-0.110533	0.123907	0.035701	-0.0309679	-0.279449	0.160769	-1.24926e-15	0.353423	1	0.223585	-0.257932	0.11453	0.0329797	0.0380019
gmax,LZDVM,LP	-0.0325392	0.0692169	0.0592589	0.0391571	0.0238728	-0.039367	0.0412021	0.0911633	-0.031809	0.00201539	0.0709067	0.0736422	0.0419475	0.00617154	-0.0605798	0.00387879	-0.0295233	0.237242	-0.0582954	-0.154407	0.0516123	0.0867332	0.0279816	0.000634094	0.0613576	0.197047	-0.00374257	0.0976909	0.0528995	0.193422	-0.237303	0.0515457	-0.13174	0.165384	0.122315	0.0336091	-0.225699	0.197423	0.247913	-0.0554163	0.239155	-1.73355e-16	0.138814	0.223585	1	-0.283688	0.299847	-0.343906	0.0749878
gmax,LZDVM,SZ	-0.14505	-0.0529748	-0.148206	-0.0720594	0.0327858	-0.0769794	-0.327694	0.0185872	-0.178721	-0.148815	0.134081	-0.180206	0.00123119	0.00432322	-0.000893162	-0.0411889	0.083102	0.0474957	0.0776756	-0.0196167	-0.288577	0.0523083	0.123083	-0.135911	-0.142899	0.0619831	-0.213293	-0.10544	-0.0451579	0.146537	-0.0995158	-0.19007	0.32281	-0.389073	0.0611429	-0.0456027	0.0607444	-0.235742	0.0773342	0.361223	-0.20107	1.15908e-15	-0.173834	-0.257932	-0.283688	1	-0.24525	-0.0863484	-0.224183
ivLZDVM,SP	0.110728	-0.203971	0.00999663	0.0114156	0.0783642	0.0645429	0.219147	0.10072	0.10589	0.0363882	-0.078328	0.0445997	0.0171064	0.0418073	-0.0688447	-0.0245807	-0.133053	0.0171317	-0.000198989	-0.0547789	-0.0550853	-0.132496	0.153391	0.0832454	-0.0698502	-0.307325	0.235609	0.151802	0.133734	-0.12292	0.0637589	0.105589	0.00207231	0.0740348	-0.206475	-0.054612	-0.0918924	0.132508	0.0187947	-0.135806	-0.000880349	1.50936e-16	0.175949	0.11453	0.299847	-0.24525	1	-0.148587	0.120425
ivLZDVM,LP	0.00156211	-0.32287	-0.0854709	0.118021	-0.122443	0.0584765	0.276814	-0.0825286	-0.169142	-0.172863	-0.279473	-0.0504994	-0.0748673	-0.279677	-0.0951889	-0.106162	-0.0378723	-0.169673	-0.136323	0.295769	-0.0385119	-0.190859	-0.0886648	0.0285842	-0.0847218	-0.184199	0.125602	0.174825	0.068576	-0.109808	0.15017	0.00390039	-0.14652	-0.0256178	-0.0118376	0.0160438	0.188478	-0.00828272	-0.184332	-0.135309	0.0370862	-8.18953e-17	-0.0530446	0.0329797	-0.343906	-0.0863484	-0.148587	1	-0.194663
ivLZDVM,SZ	0.11859	0.137004	0.0129606	-0.0202688	0.00895878	0.0337022	-0.0348546	-0.00813907	0.374279	0.213416	0.130103	0.0292884	-0.0331088	0.149631	-0.0307091	0.182983	-0.0590634	0.101379	0.0682082	-0.185664	0.219799	0.0819042	-0.139757	0.126191	0.0500943	-0.0278311	-0.12802	0.177191	0.343914	0.116585	-0.00926572	0.078358	-0.206936	0.249492	-0.148432	-0.0255619	-0.17631	-0.110187	-0.138293	0.0555517	0.0970801	-1.93618e-16	0.358542	0.0380019	0.0749878	-0.224183	0.120425	-0.194663	1
AELZDVM	-0.0166809	0.193798	0.0627753	-0.07311	0.0989127	-0.163947	-0.192943	0.115147	0.147671	-0.00922006	0.186615	0.0241215	-0.00250977	0.116149	0.0147837	-0.00234627	0.0100352	-0.0888054	0.110385	-0.235555	-0.104861	0.102342	0.115014	0.155215	0.144625	0.216894	-0.179998	-0.222742	-0.0512443	-0.0302276	-0.0745283	-0.0302604	0.166611	0.0873121	0.0842434	-0.163085	-0.225116	0.0819627	-0.0103069	0.276239	0.0458562	-3.97467e-15	0.109564	-0.0361043	0.207992	0.131295	-0.0246798	-0.300621	0.0871457
actres,LZDVM	0.0391053	-0.120106	0.230691	-0.0146139	0.0541239	-0.0542007	0.11505	0.0692933	-0.0444642	0.00515892	0.0647205	0.238393	0.12315	0.0553894	-0.00224008	-0.0075807	0.0177939	-0.106859	0.0917435	0.0395933	0.0343921	-0.101577	0.071108	0.0402596	-0.0852034	-0.0156874	0.228336	-0.0547845	0.0708813	0.0564638	0.00365956	-0.0758055	-0.0575609	-0.126945	-0.0153339	-0.0582034	-0.214013	0.00132527	-0.142495	-0.046793	-0.0228024	7.12666e-16	0.144525	0.100805	0.229766	0.144176	0.0706992	0.0116241	0.00524252
mortday,LZDVM	-0.141829	-0.0315379	-0.0629126	0.0945152	0.0203869	-0.0817052	-0.202151	0.130728	-0.078477	-0.352948	-0.0306399	-0.0772952	-0.105277	-0.0058323	0.0123696	0.102245	0.0924184	0.0270304	-0.147543	-0.0176456	-0.323157	-0.000335997	0.203515	-0.101589	0.0410931	0.284861	-0.22768	0.188081	-0.22037	0.0447046	-0.0996849	0.259721	0.0675232	-0.0475358	0.152333	-0.316903	0.191834	0.114477	0.34223	0.119739	-0.056557	-6.67803e-16	0.141015	0.0375038	0.0401414	0.0428672	0.0075008	0.00502244	-0.271153
gmax,PZRES,SP	0.278372	0.29132	0.134845	-0.0498926	0.250253	-0.0646488	-0.0682821	0.00423455	0.283059	0.428341	0.334351	0.131122	0.00876934	0.145706	0.142592	0.0667486	-0.216354	-0.0195849	0.0493405	0.0643325	0.518708	0.224157	-0.38276	0.238313	0.0300424	0.0573803	-0.0137742	-0.062512	0.196245	0.198957	-0.0300303	-0.005167	-0.246671	0.117801	-0.147563	0.0287468	-0.197952	-0.126713	-0.1563	-0.177055	0.144727	3.36932e-16	0.152947	0.167819	-0.0183126	-0.169202	-0.0798852	-0.0867736	0.350059
gmax,PZRES,LP	-0.0766958	-0.129582	0.357899	0.0764308	-0.115324	0.139081	0.241227	-0.123988	-0.177345	-0.0982195	-0.118189	0.374779	0.102181	0.0298479	-0.00765478	0.0945176	0.0422524	0.0429375	0.176328	-0.222197	-0.214651	-0.248079	0.119635	-0.247162	-0.000757041	-0.253848	0.0959118	0.280314	0.229611	-0.29432	0.209398	-0.0893469	-0.0589031	0.0599317	-0.084085	-0.104453	0.00387618	-0.138655	-0.292334	-0.153912	-0.242703	-3.16586e-16	0.107309	-0.0033412	-0.110425	-0.0997863	-0.0330083	0.249018	0.068231
gmax,PZRES,SZ	-0.183005	-0.143399	-0.26266	0.0726316	-0.106324	0.0465049	-0.0162568	-0.133961	-0.31954	-0.129964	-0.261854	-0.222768	0.0494134	-0.15443	-0.106535	-0.0828337	0.0726591	0.195154	-0.107278	-0.118698	-0.19369	-0.0465969	0.0733522	-0.257669	-0.0644451	-0.000766792	-0.0201077	0.159637	0.0308937	-0.140104	-0.123524	-0.106508	0.100649	0.0929745	0.19081	0.224862	0.119561	-0.0599979	0.0810794	0.0897616	0.0123686	-3.10298e-16	-0.191891	0.00879086	0.0041201	0.0756456	-0.0276173	0.0777703	-0.159506
gmax,PZRES,LZ	-0.205557	0.00754049	-0.00179792	0.0264732	-0.286043	0.0150492	-0.0894421	0.0699782	-0.0632122	0.0230343	0.0790705	0.0169499	0.0594601	-0.0716831	0.0346066	-0.00659124	0.108978	0.207315	0.0373418	-0.189748	-0.156696	-0.042891	-0.0985847	-0.0668746	0.109279	-0.0354861	-0.250026	-0.0683884	0.18633	0.0231617	0.0106065	-0.260002	0.0607446	-0.203114	0.0175988	-0.081913	0.0768062	-0.0600056	0.0954638	0.036595	-0.0233378	-1.14222e-15	0.00223472	-0.0695824	-0.0538743	0.139708	-0.144283	-0.118496	0.0783647
ivPZRES,SP	-0.263357	-0.014271	-0.0356132	-0.0123332	-0.216817	0.054103	-0.00942236	0.0431164	-0.176949	-0.18775	-0.0384216	-0.00329288	0.106098	-0.00741335	0.143455	0.128246	-0.0047478	0.0926105	0.0767599	0.0429269	-0.206279	-0.159132	0.139143	-0.100755	-0.0515076	-0.00998174	-0.0543078	-0.0252212	-0.156526	0.00729384	-0.117394	-0.00368084	0.304468	-0.139758	0.0897385	0.00263441	0.0087563	-0.0232644	0.0642602	0.132543	-0.417853	-2.25138e-16	-0.00594389	-0.239639	-0.0568244	0.271676	-0.0562723	-0.075646	-0.119627
ivPZRES,LP	0.104595	-0.0277337	-0.0944055	0.0796864	0.0591671	0.0445639	0.0609775	0.106061	0.184012	0.134202	-0.0328419	-0.0967156	-0.0157936	-0.0324494	0.00656828	-0.0268995	0.0634821	0.00716403	-0.303088	0.0856653	-0.0466806	0.028758	0.0941684	0.0463487	0.142424	0.0657084	0.0309737	-0.134978	-0.109998	-0.0846362	0.138744	0.0462559	0.17209	-0.119303	-0.0770759	-0.0667686	0.00575103	0.157837	0.0958761	0.0688224	0.0185001	0	-0.130854	-0.0220553	0.0575984	0.035362	0.142228	-0.100414	-0.0289203
ivPZRES,SZ	0.160749	-0.211218	-0.168574	0.0199132	0.0106821	0.0235996	-0.074864	0.0117308	0.140305	0.0406992	0.0117698	-0.104546	-0.055675	0.147467	-0.272201	-0.158816	-0.020877	0.253993	0.0700134	-0.2101	-0.0601644	0.341829	0.132346	0.0254145	-0.273242	-0.209194	-0.0400851	0.0312069	0.287527	-0.0251348	-0.14013	0.0632707	-0.0143577	-0.0457079	-0.0598757	0.046521	0.199604	-0.111428	-0.0277358	0.0893252	0.306756	5.98071e-16	0.236279	0.0340496	0.0815458	-0.0224249	0.0764565	-0.0333172	0.22419
ivPZRES,LZ	-0.122046	-0.101886	0.346313	0.00521178	0.0125304	-0.0793464	0.0610802	0.0470025	-0.23571	-0.269492	-0.0511581	0.292635	0.0815884	-0.0866224	0.0744758	0.0109253	0.193322	-0.178896	-0.0505655	0.13263	-0.130807	-0.141346	0.123151	-0.137899	0.130842	0.124474	0.160921	0.0509359	-0.179506	0.0287729	-0.0533288	0.0493538	0.0337847	-0.13026	0.0921066	-0.0535654	-0.0056491	-0.0350778	0.118545	-0.109641	-0.15206	8.80999e-16	-0.0983443	-0.0171596	0.0617971	0.0993949	-0.0136809	0.128863	-0.256298
AEPZRES	0.00245701	-0.0265643	-0.133961	0.0829006	-0.170325	0.0740177	-0.0531812	0.00696817	0.139359	0.0427451	0.0197904	-0.0983639	-0.0656907	-0.108405	-0.0379816	0.209402	0.13359	0.031099	-0.118375	0.113991	0.0146497	0.0306858	-0.0658962	-0.088871	-0.0728453	0.111145	-0.157044	0.409715	0.181574	0.101754	0.0775577	0.112686	-0.243923	-0.00861303	-0.0811599	-0.0682718	0.20066	-0.0737418	-0.0214302	-0.0298499	-0.046689	-1.46077e-15	0.244151	0.0301744	-0.0305078	-0.035705	0.02873	0.133334	0.227141
actres,PZRES	0.0515261	-0.0492849	-0.15039	0.0274604	0.100646	0.0923527	-0.131014	-0.00872044	-0.0625944	-0.0198504	0.128038	-0.148993	-0.00333073	-0.0624547	0.0877238	0.11788	0.0721809	-0.00671505	-0.0856198	-0.0941912	-0.164739	-0.0143672	-0.097382	0.043221	0.0529665	-0.0916017	-0.156005	0.287607	0.138654	0.081181	-0.0436759	0.000313409	0.0121955	-0.0110535	0.0178841	-0.196479	-0.083882	-0.0148943	-0.10253	0.28021	-0.00245779	-3.88677e-16	0.123942	-0.00317582	0.00812256	0.125409	0.150435	0.00420312	0.298748
mortday,PZRES	0.0895852	0.0468018	-0.133274	-0.0367307	0.0506461	-0.00193736	0.0318224	-0.129776	-0.101801	0.155684	0.122994	-0.0655866	0.0599206	0.235874	-0.091791	-0.0626229	-0.0948542	0.269761	0.21025	-0.326586	-0.263919	0.102127	0.221593	-0.054047	-0.0198071	-0.272431	0.0487061	-0.00647898	0.266152	-0.0797188	0.0294553	0.00422063	-0.011585	0.137903	-0.284133	0.112944	-0.0470815	-0.122277	-0.0700837	0.0535114	0.0671343	-2.83739e-16	0.140876	-0.0654692	0.130819	-0.0747236	0.202197	-0.183722	0.174058
inhSZLZLP,SP	0.160874	0.392606	-0.00502048	-0.0611312	0.0634943	-0.0388269	-0.00745431	0.0497916	0.390602	0.189679	0.257966	-0.0185235	-0.00722091	0.208062	-0.100714	0.196768	-0.104109	0.0259912	0.0148775	-0.203468	0.0480644	0.225412	0.0671376	0.17839	0.142565	0.00652333	-0.0815546	-0.0370454	0.102726	0.0639536	0.129752	0.203894	0.0324449	0.164879	-0.359324	-0.172548	0.125087	0.131352	0.0214754	0.139232	0.00591554	-3.09775e-16	0.247388	0.223799	0.0795315	-0.120472	0.0913163	-0.294616	0.212326
inhSZLZ,LP	-0.00516173	-0.154866	-0.242189	0.0859147	0.00282363	-0.00286647	-0.166415	0.0295744	-0.213984	-0.107229	0.0760118	-0.209921	-0.135801	-0.106432	-0.220286	-0.180324	0.0834577	0.0890417	-0.00443054	0.0864741	-0.0120608	0.174277	-0.106007	-0.0964544	-0.22654	-0.0261777	-0.0726292	-0.157802	0.154997	-0.0104349	-0.132951	-0.294101	0.0473908	-0.138216	0.128697	0.274528	0.0233552	-0.181824	-0.0393207	0.0204803	0.222669	-1.16097e-16	-0.121867	-0.0664069	0.0192131	0.173285	-0.0742026	0.198476	-0.0990446
inhLZ,SZ	0.00169631	-0.0854403	-0.243704	0.10286	0.00516358	-0.146688	-0.0608162	0.0647596	0.128496	-0.127441	-0.162323	-0.230466	-0.0897963	-0.191769	-0.0813762	-0.117425	0.0946102	-0.000981633	-0.316558	0.0162971	0.129474	0.140833	-0.179622	0.0460273	-0.0352171	0.185227	-0.0627488	0.0104671	-0.146419	0.0540761	-0.219694	0.0988822	0.05419	0.042536	0.296098	0.0285665	0.0933852	0.197768	0.292119	0.144421	0.307662	1.1524e-16	-0.0947353	0.118512	0.107746	-0.129605	-0.0482788	0.000200158	-0.0281655
threshPZRES,SP	-0.100847	-0.0636886	0.126692	-0.0180133	-0.0325106	0.00892422	-0.218279	-0.0575406	-0.142203	-0.139194	0.0631971	0.0880868	-0.00673422	-0.0257346	0.0821995	0.0633578	-0.0220072	0.0356144	0.104629	-0.146497	-0.0840873	0.351956	0.0210199	-0.0155299	0.078303	0.0914923	-0.219929	-0.195659	-0.145041	-0.0107331	-0.437017	0.0439635	0.272361	-0.0745156	0.315908	0.299207	0.0284774	-0.366011	-0.0675248	0.168291	0.197726	-9.47525e-16	-0.129952	-0.184972	0.00300267	0.132813	-0.118318	-0.0875785	-0.119937
threshPZRES,LP	-0.207198	-0.0358081	-0.131954	0.10888	0.0345366	0.00052183	-0.00852641	-0.107427	-0.230336	-0.15102	0.0533936	-0.0975231	0.026045	-0.170845	0.216023	-0.0491701	0.167925	0.154587	-0.100671	0.0347493	-0.124038	-0.119955	-0.0809901	-0.203431	-0.0432994	0.0333369	-0.109625	0.169943	-0.0799618	-0.0502108	-0.0597525	-0.0759131	0.0703218	0.0396383	0.156114	-0.151583	0.225217	0.109876	0.27456	0.0560474	-0.0735465	-2.41847e-16	-0.154603	0.0135999	0.0518225	0.058966	0.0419354	0.0447965	-0.135935
threshPZRES,SZ	-0.0466317	-0.0425573	-0.0438627	0.0867532	0.0578883	0.0367073	0.215357	0.0796059	-0.0731519	-0.0807094	-0.0621572	-0.0360984	-0.00364158	-0.143472	0.229532	0.119082	-0.189474	-0.392447	0.0327484	0.337786	0.0302869	-0.317692	-0.0586718	0.356906	0.10787	0.0459989	0.0746635	-0.0124743	-0.0790685	0.00110186	-0.0375882	0.164528	-0.131873	0.0809625	0.000154555	-0.0932531	-0.340343	0.222179	-0.0468815	-0.0656285	0.029809	-9.56662e-16	0.104375	0.0988882	0.102004	-0.215376	0.208144	0.168609	-0.0417509
threshPZRES,LZ	-0.0782833	-0.0510785	-0.257763	0.0375226	-0.15758	-0.0365873	-0.268134	-0.0587223	-0.0494438	-0.140061	-0.0652154	-0.231013	-0.167865	-0.0188915	-0.187871	0.189002	0.0435891	0.209202	-0.00690917	-0.230477	-0.173229	0.218695	0.00358368	-0.106778	-0.122706	0.0962918	-0.332239	0.188516	0.237052	0.0538475	-0.290751	0.0187421	-0.0384509	0.0601229	0.0128636	0.0118576	0.119167	-0.204112	-0.0531726	0.221901	0.147654	-2.31425e-15	0.272118	0.0472831	0.0307867	0.0934637	-0.0255008	-0.00857516	0.24586
mortnight,PZRES	0.136523	0.00172957	-0.0629341	0.0330056	-0.038931	0.0985674	0.148426	-0.0946411	0.124159	0.236642	-0.0408888	-0.0242222	-0.00163461	0.0636651	-0.0695096	-0.0678671	-0.0391679	-0.0669681	0.144782	0.000521457	0.153002	0.0282571	-0.0964648	0.204166	0.0749936	-0.349575	0.107066	0.0382029	0.246834	-0.183687	0.203576	0.0330753	-0.184566	0.224452	-0.26806	0.139532	-0.0349023	-0.117668	-0.477665	-0.0748594	0.0837761	-8.84624e-16	0.213728	0.119034	-0.152224	-0.220115	0.160787	0.149729	0.343529
IkPZ	0.0250971	-0.0553857	-0.243538	0.0147921	-0.103431	-0.0753606	-0.211681	0.0522343	0.156754	0.0807094	0.0653783	-0.201086	-0.0316257	0.0230711	-0.107667	-0.0257791	0.0482898	0.339631	-0.209322	-0.148163	9.97115e-06	0.322274	-0.0383699	-0.018429	-0.174238	0.0558439	-0.193403	0.208659	0.185509	0.213129	-0.0467555	0.070848	0.0953033	-0.0995231	-0.0494584	-0.0445012	0.294473	-0.07694	0.13402	0.24789	0.0840901	1.24433e-15	0.165086	-0.0188391	0.0499555	0.213176	-0.0729623	-0.140889	0.100144
gmax,PZDVM,SP	0.0856998	0.241237	0.0262659	-0.0405283	0.18614	-0.00282078	0.0563139	0.0731811	0.036747	-0.0320482	0.270496	0.0139618	0.0177023	0.161669	-0.0253051	-0.00676517	-0.208075	-0.0560238	0.195927	0.0362971	-0.113364	-0.181291	0.203911	0.0884122	-0.0880279	-0.101701	0.0665794	-0.321267	-0.0301324	-0.0468473	0.140685	-0.0854129	0.175725	-0.0776686	-0.292476	-0.170048	0.0032402	0.137838	0.106955	-0.082889	-0.263806	7.83931e-16	-0.0275885	0.0814874	-0.0313725	0.223168	0.0766541	-0.180889	-0.143312
gmax,PZDVM,LP	-0.196244	0.0370228	0.195591	0.0476048	-0.142234	0.0588706	-0.0310543	-0.0913864	-0.155158	-0.00889802	0.018379	0.179445	0.0467923	-0.0811834	0.162326	-0.125842	0.0110346	0.13837	0.114477	0.212469	0.173953	0.0138941	-0.127649	-0.13151	-0.0110478	0.0812865	-0.0433592	-0.214327	-0.176123	0.0447714	-0.171673	-0.15313	-0.0956158	-0.0655599	0.283467	0.172215	-0.0319365	-0.112836	-0.0847791	-0.151784	-0.0369686	2.82996e-16	-0.154787	-0.0837344	0.103817	-0.0673735	-0.23232	-0.0282138	-0.106184
gmax,PZDVM,SZ	-0.0719775	0.0296369	-0.207355	-0.0194573	-0.0582167	-0.108237	-0.306692	-0.00832367	0.0686687	0.00564969	0.193732	-0.217611	-0.00774389	-0.0359115	0.00460308	-0.0160045	0.119797	-0.0189022	-0.105683	-0.0744152	-0.0184656	0.322817	-0.129099	0.101768	-0.024275	0.0997726	-0.241493	-0.137287	-0.00119263	0.195338	-0.226153	-0.0670414	0.363559	-0.191649	0.103101	0.0598646	0.0298314	-0.239826	0.0527107	0.448147	0.143642	3.8419e-16	-0.0550906	-0.177355	-0.168952	0.537682	-0.263712	-0.110391	0.0678794
gmax,PZDVM,LZ	0.105415	0.181342	-0.0212752	0.0282687	0.222215	-0.150771	-0.165284	0.0847738	0.253235	0.0716683	0.259766	-0.0312115	-0.0967036	0.106487	0.152083	0.124293	-0.236423	-0.0748966	0.0356817	0.0681207	0.316189	0.0898682	-0.259804	0.243024	-0.052499	0.242636	-0.106533	-0.070979	0.00656316	0.398626	-0.228687	0.154033	-0.153308	0.0366276	0.0883808	-0.0601467	-0.344535	-0.015228	0.234741	-0.00339508	0.214038	-1.38944e-15	0.164618	0.0249936	0.193874	0.0512622	0.0330477	-0.19934	0.297705
ivPZDVM,SP	0.145848	-0.0147581	-0.126692	0.0393686	0.109301	-0.0412735	0.00594522	0.00621327	0.0228269	0.0769202	0.118699	-0.132643	-0.0615803	-0.147526	0.0475898	-0.0799945	-0.0893325	-0.0402071	-0.102844	0.0627013	0.270682	0.145773	-0.259717	0.208738	-0.0653363	0.00826269	-0.00878023	0.182231	0.0719386	0.228107	-0.151053	0.0385869	-0.0363175	0.182812	-0.00135282	0.12878	-0.0370869	0.0122516	0.0531161	0.0634427	0.102675	2.85255e-16	-0.109646	-0.0242284	0.0491763	0.00694578	0.0972038	0.0352605	0.255366
ivPZDVM,LP	0.271016	0.0301039	0.206294	-0.0441921	0.195887	0.0382047	0.271122	0.0567971	0.0952045	0.113328	0.0687106	0.209934	0.0961309	0.207701	-0.0875626	-0.00244913	-0.0901324	-0.0501549	0.158267	-0.118423	-0.0816775	-0.231588	0.243911	0.123837	-0.000261773	-0.261395	0.307227	0.00946392	0.139789	-0.137137	0.215732	0.0974598	-0.088155	0.0870385	-0.290898	-0.140061	-0.136052	0.201322	-0.0956775	-0.170927	-0.171748	7.45405e-16	0.193706	0.180237	0.133217	-0.212106	0.322894	-0.0275923	0.146025
ivPZDVM,SZ	-0.0948513	0.256545	-0.0211648	-0.0479435	0.0912962	-0.112835	-0.18967	0.0255199	-0.112719	-0.103861	0.0521611	-0.0768601	-0.0525599	-0.0969117	0.137327	0.071607	0.0353855	-0.17999	-0.149483	0.137871	0.204119	0.0883422	-0.200248	0.184996	0.159962	0.373618	-0.0754425	0.0155521	-0.266416	0.284781	-0.169077	0.129485	0.0571438	0.011691	0.214075	-0.0317083	-0.10575	0.0975152	0.182233	0.138936	0.00716976	-6.76078e-17	-0.0744102	-0.000996193	0.00686686	0.090226	-0.189813	0.00419329	-0.145857
ivPZDVM,LZ	-0.146618	0.26078	0.0741421	-0.0954029	-0.149802	-0.116748	-0.212135	-0.0107432	0.0849839	0.0433144	0.195368	0.0304324	0.0859462	0.00512599	0.207498	0.13024	0.0681249	-0.120455	0.123969	-0.0895739	0.137138	0.262478	-0.0934385	0.222678	0.20826	0.362812	-0.215193	-0.261448	-0.121533	0.149764	-0.402677	-0.0061134	0.169659	0.0669068	0.19733	0.271958	-0.187564	-0.165491	-0.040986	0.111095	0.16481	-3.72253e-16	0.00519735	-0.157257	0.0592327	0.0658023	-0.204119	-0.291716	0.158156
AEPZDVM	-0.042048	-0.0156108	0.12328	0.0656084	-0.159807	-0.0924053	-0.024517	0.0790671	0.0654565	-0.043893	-0.00332249	0.137095	0.0404636	-0.0490738	-0.009695	0.213263	0.0366712	-0.151235	-0.0151986	-0.109118	0.12631	0.0571021	-0.253839	0.154916	0.0418515	0.0438628	-0.101199	0.29027	0.290134	0.0718612	-0.104234	0.081459	-0.203016	0.034803	0.0830595	0.0234841	-0.130877	-0.104896	-0.179839	-0.0213107	0.0992422	-4.39953e-15	0.312918	0.00824137	-0.0205672	-0.0753261	-0.0403681	0.228039	0.292108
actres,PZDVM	0.0315369	0.220678	0.476766	0.0524582	0.191973	0.110788	0.0853559	-0.0274661	0.0108347	0.0295966	0.209563	0.421288	-0.0248288	0.179443	0.331546	0.414527	-0.100982	-0.0686748	0.189482	0.031177	-0.0434614	-0.18046	0.0716859	-0.182072	0.216231	0.123687	-0.0492082	0.0465963	0.0836577	-0.00670086	0.107153	-0.010086	-0.187242	0.00218582	-0.0512042	-0.200936	-0.102126	-0.0608632	-0.0979716	-0.212023	-0.168873	-3.68005e-16	0.125113	0.0814651	-0.0507718	-0.148899	-0.0537802	-0.00431617	0.0807642
mortday,PZDVM	0.0184236	0.0418407	-0.0808842	0.0444752	0.104382	-0.058177	-0.0259886	-0.0115837	0.0709177	-0.0356535	0.174086	-0.0667216	-0.0259893	-0.0142111	0.00230003	-0.0865726	0.00497749	-0.21854	-0.0105382	0.114187	0.196296	0.0797057	-0.166745	0.337411	0.0787419	0.122716	0.0461158	-0.032131	-0.0985684	0.0676078	0.0420985	0.0588103	-0.25763	0.0756932	0.055241	-0.0632442	-0.257106	0.156162	0.136905	-0.107138	0.327872	-2.25907e-16	-0.0935186	0.033258	0.132409	-0.15604	0.0748617	0.0979062	0.0175444
refnitr	0.404752	-0.150817	0.0123381	-0.0417493	0.194235	0.00910814	0.27999	0.0589055	0.558485	0.291634	0.0120596	0.0529501	-0.035607	0.207083	-0.142725	0.026242	-0.153906	-0.141051	0.0389566	0.107688	0.147953	-0.0317753	0.125631	0.158465	-0.196306	-0.319561	0.253223	0.0631022	0.247225	-0.160858	0.326777	0.179965	-0.0837354	-0.0815849	-0.374185	-0.0736114	0.155161	0.0478983	-0.138475	-0.208413	-0.00559073	1.1642e-16	0.323705	0.192551	-0.121509	-0.151874	0.307034	0.0662279	0.218462
refdec,PON,NH	0.208695	-0.0523972	-0.0425361	-0.00797512	0.22698	0.0150198	0.0347515	0.0961644	-0.0311473	0.131504	-0.0791448	-0.0543726	-0.00362753	-0.037698	0.0529572	-0.00530252	-0.116917	-0.139403	-0.171344	0.547624	0.231264	-0.222033	-0.0234744	-0.0220495	-0.062878	0.154922	0.126008	0.0607635	-0.00123038	0.143093	0.191121	-0.0342812	-0.17148	-0.124279	-0.0664567	0.092724	-0.207613	-0.0241782	-0.108456	-0.217877	-0.109542	3.34656e-16	-0.00974984	-0.0477115	-0.0306602	0.0258457	-0.0391436	0.140264	-0.0836033
refdec,PON,DON	-0.204115	0.0495521	0.0304147	0.0421404	-0.0939886	-0.0583376	-0.105284	-0.0260575	-0.205175	-0.122212	-0.13582	-0.0234955	0.00276892	-0.144596	0.192247	-0.0503177	0.102377	0.0349739	-0.0521266	0.237935	0.115641	0.0451705	-0.0755502	-0.217931	0.00704459	0.362682	-0.122062	-0.164163	-0.277614	0.157774	-0.325562	-0.0695833	0.0394833	-0.0418238	0.423513	0.25311	-0.0310202	-0.0123934	0.11304	-0.0266861	-0.0289518	6.50057e-16	-0.243938	-0.161412	0.0373769	0.140464	-0.320805	0.0134895	-0.250805
refdec,LPON,DON	0.0911444	0.0209886	-0.0677589	-0.0368577	0.241324	-0.0822895	-0.164583	0.0763205	-0.0829834	0.0309173	0.0281305	-0.0903503	-0.0428982	0.0821408	0.085451	-0.0442341	-0.0483855	-0.0666539	-0.0378028	0.119362	-0.0888192	-0.115164	0.120023	0.0297762	-0.0834395	0.259903	-0.0875314	-0.0106225	-0.00861982	0.122319	0.0884871	-0.102708	-0.0302998	-0.0495229	1.7301e-05	-0.0547251	-0.0551881	0.0091576	0.0149455	0.023426	-0.162774	2.19834e-16	-0.0206521	-0.121183	-0.221172	0.290388	-0.186484	0.127693	-0.0793497
refdec,LPON,NH	-0.02732	0.136807	-0.0654091	-0.00993834	0.130204	-0.0873484	-0.0675121	0.0561868	0.109223	-0.10312	0.148462	-0.0846854	-0.0534096	-0.00679055	-0.0510559	0.131647	-0.0521133	0.0564848	-0.162368	-0.0224645	0.0806025	0.0569153	-0.0727642	0.0296417	0.0208468	0.282073	-0.0916589	0.0974147	-0.0954027	0.246334	-0.138918	0.151081	-0.0864638	0.244968	0.0175404	-0.0740102	-0.193538	0.0633606	0.232006	0.0346532	0.187845	3.90941e-16	-0.0342694	-0.00899143	0.209575	-0.0400028	-0.0310319	-0.174188	0.0985826
refdec,LPON,DON	0.259172	-0.045916	-0.152678	0.0476399	0.171681	0.0696905	0.18292	0.01858	0.154803	0.136657	-0.0695708	-0.0943775	-0.131029	0.143394	-0.268584	0.0303447	-0.0897906	0.109482	-0.0694808	-0.0442088	-0.0387365	-0.181617	0.0911356	-0.0627303	-0.0608004	-0.363618	0.16902	0.233719	0.364755	-0.227324	0.480372	0.0243545	-0.169572	0.16938	-0.490983	-0.212447	0.0829514	0.0738098	-0.125291	-0.0289944	0.0084797	9.47302e-16	0.199751	0.231699	0.0185675	-0.276068	0.266712	0.0913852	0.177244
refdec,DON,NH	0.115915	0.133382	0.0365773	0.0844586	0.217946	-0.031841	-0.0487388	0.0404544	0.101363	0.0730235	0.153107	0.100368	-0.00278869	0.311203	0.000361641	0.148006	-0.0354447	0.123399	0.0830936	-0.0120789	-0.0108971	-0.0582613	0.0973638	-0.0316072	-0.148961	0.122307	-0.0676051	-0.000161196	0.121426	0.0242273	0.01051	-0.120042	-0.125197	-0.0647397	-0.0109389	-0.112806	-0.164104	0.00586771	0.0703563	-0.0852632	-0.0459158	3.50251e-15	0.174306	0.0756477	0.0775064	0.0250075	-0.0220052	-0.072577	0.0870807
fDON,DONref	-0.0148357	-0.0642882	0.0500149	0.122322	0.115548	0.0967391	0.0228718	0.0782336	0.0126724	0.00415069	0.0794939	0.0783017	-0.0169097	0.0901416	0.0828719	0.347878	-0.126166	0.0912767	0.0356712	-0.131977	-0.099703	-0.19651	-0.0390196	-0.0909025	-0.00224104	-0.0722105	-0.100038	0.340687	0.342822	0.0297414	0.0198368	0.0289312	-0.052884	-0.00498451	-0.0727306	-0.215738	-0.219085	-0.192111	-0.00867417	-0.0152422	-0.0885903	4.31521e-16	0.330849	0.108578	0.0390438	0.0420356	0.111947	0.0129003	0.266372
refdec,DONref,NH	0.0138115	0.00710321	-0.0131945	-0.0527001	-0.0854656	-0.0868623	-0.179283	0.0685447	0.188873	-0.00864961	0.0842958	-0.0150105	-0.0599818	0.0197464	-0.0981514	0.0353815	-0.0784352	-0.0860676	-0.000107118	0.014938	0.193359	0.253336	-0.153575	0.0976865	-0.107069	0.142406	-0.195828	-0.0351829	0.0320763	0.142563	-0.167224	0.129099	-0.064443	-0.0143113	0.0477384	0.136298	0.0822349	-0.153154	-0.0371132	-0.0613251	0.293676	2.18976e-16	0.175375	-0.0569271	-0.0168338	0.0116009	-0.0623342	-0.111484	0.204545
refdec,OP,Si	-0.169842	-0.0966074	0.1057	0.0702972	0.055073	0.0933114	-0.0572239	0.0279333	-0.076463	-0.0579926	0.025527	0.11725	0.117585	0.0659467	0.230075	0.0610808	0.114021	-0.0603512	0.0617927	0.103896	-0.0215936	-0.0336375	0.143918	0.0282612	0.0178513	0.0110538	0.0689184	-0.0450632	-0.111284	-0.0774233	-0.0840907	-0.00556735	0.152112	-0.188921	0.131651	-0.059773	-0.137526	-0.0969846	-0.115511	-0.00686038	-0.157526	3.6089e-16	0.0519987	-0.0548147	-0.0697453	0.0791188	0.0364661	-0.0393385	-0.0570801
sink	0.0864328	-0.137707	0.101128	-0.040757	0.129949	0.0768006	0.0438948	-0.0415445	-0.0796095	-0.00192875	-0.167332	0.0933908	-0.0183952	-0.00968912	0.127324	-0.0161639	-0.0496799	-0.101873	-0.116534	0.23835	0.159781	-0.0909999	0.0312101	0.00406011	-0.0984686	0.0455308	0.141268	0.0459716	-0.0939491	0.0938627	0.0464517	0.0244394	-0.0720138	-0.0954671	0.0415174	0.0238257	-0.0822651	-0.0177712	-0.123551	-0.159753	-0.0943412	-6.68305e-16	-0.0097048	0.0419246	-0.0388191	0.0251778	0.0426265	0.0705868	-0.126393
Lsink	-0.253822	0.0593619	0.0855515	-0.031177	-0.16484	-0.138491	-0.180692	0.113025	-0.122116	-0.202225	0.104061	0.0241516	0.0628151	-0.242262	0.134169	-0.0770999	-0.0124224	-0.12577	0.0575399	0.107684	0.107434	0.0557546	-0.209072	0.128959	0.0879566	0.343151	-0.152982	-0.0790682	-0.238836	0.220034	-0.347036	-0.127811	-0.0374452	-0.0654408	0.361183	-0.0240294	-0.216275	0.0115981	0.219676	0.113463	0.0341264	-3.04203e-16	-0.1932	-0.222342	0.183974	0.168243	-0.172582	-0.112948	-0.0270449
koxy,mic	-0.182085	0.0881972	0.0558392	-0.0712346	-0.156255	0.0230927	-0.189792	-0.11481	-0.296849	0.046462	0.0217445	0.0160842	0.0890738	-0.15899	0.202886	-0.160307	0.0762758	0.00846581	0.122658	0.216465	0.191651	0.148159	-0.211122	-0.100871	0.083757	0.188513	0.0170872	-0.121259	-0.0516188	0.143358	-0.233091	-0.246381	-0.146034	0.0620622	0.196202	0.333829	-0.0440739	-0.172788	-0.152452	-0.0411006	0.0616876	1.18457e-15	-0.167187	-0.133245	0.00832402	-0.0165897	-0.20216	-0.0140474	-0.01435
koxy,met	0.0298956	-0.0764868	0.0800226	-0.00169158	0.10822	0.0545727	-0.2556	-0.070226	-0.0652756	0.0666579	0.116085	0.0823308	-0.101448	0.134844	-0.010136	0.187975	-0.0120213	0.129035	0.136533	-0.180429	0.0836338	0.201359	-0.155914	-0.00785743	-0.073578	0.027401	-0.225719	0.176079	0.311891	0.0295825	-0.143593	-0.095662	-0.0284545	-0.0370027	0.100431	0.178386	-0.1094	-0.482916	-0.310595	0.0549052	0.15023	5.17432e-16	0.183213	0.0162458	-0.0839547	0.068012	-0.0924009	0.0720533	0.280522
Chl2CSP,min	0.00503982	-0.151737	0.132539	0.208602	-0.0627477	0.0126264	0.113591	0.108358	-0.197327	-0.162359	-0.194005	0.129573	0.0208953	-0.160836	0.137962	0.0183262	-0.00962994	-0.22301	-0.116164	0.271991	0.0962016	-0.124292	-0.101527	-0.00743929	0.0495988	0.0931391	0.0767768	0.186059	-0.176751	-0.0287004	-0.0406211	0.0194345	-0.0807507	-0.162043	0.178428	0.00304418	0.0116863	0.00781809	-0.021202	-0.202105	-0.197451	-7.98925e-16	-0.0885206	-0.114308	-0.0911629	-0.0537544	-0.01354	0.382641	-0.209114
Chl2CLP,min	0.0052653	-0.0282209	-0.13064	-0.00185507	0.281208	0.125785	-0.119776	0.0198258	-0.238061	-0.0176095	0.000531531	-0.107975	0.0287148	0.137527	0.166042	0.0274335	-0.089739	0.0135173	0.135228	0.0602664	-0.0797624	-0.0330554	0.110383	0.109094	0.0681529	0.00303876	0.0331007	-0.154274	-0.157327	0.066976	-0.115858	0.0307129	0.0596849	0.0075309	0.139026	0.137772	-0.337832	0.0317143	-0.0596038	0.0330268	0.0331925	7.83666e-16	-0.0368189	-0.0783875	0.120641	0.0240711	0.088976	-0.053816	-0.111767
Chl2CSP,max	-0.0365757	-0.0256798	0.0712104	0.131253	-0.0694563	-0.0635919	0.0871782	-0.0393638	-0.132088	-0.0268699	-0.0870715	0.0454633	0.0470398	-0.0651376	0.102335	0.046088	0.0418898	-0.0179175	0.0253299	0.0593349	-0.0273216	0.101001	0.0387381	-0.155406	-0.0628225	0.0391441	-0.0383858	-0.00958754	-0.10959	0.0144757	-0.0819193	0.0120946	0.121652	-0.124451	0.0378317	0.08413	0.109885	-0.119807	-0.0213742	-0.0654857	-0.114173	-4.4709e-16	-0.122965	-0.0671393	-0.101454	0.0963576	-0.0903609	0.0794757	-0.19391
Chl2CLP,max	-0.00721958	-0.0252726	0.0190549	-0.013615	-0.0644648	-0.0242792	-0.10279	-0.0611165	-0.0358965	-0.0592662	0.00202972	0.0233927	0.0258036	0.0905804	-0.0391857	0.0408544	0.0419706	0.0676136	0.0279533	-0.178255	-0.0352762	0.092117	0.0238571	-0.109358	-0.23776	-0.0179127	-0.0861938	0.0692583	0.119341	0.0840559	-0.0443437	-0.0337865	0.151803	-0.0522212	-0.0510964	0.104096	0.193713	-0.193399	0.0665753	0.0682598	-0.075855	9.96408e-15	0.009938	-0.00120501	-0.10003	0.215808	-0.153496	-0.0009857	-0.0693471
extchl	-0.0572663	-0.125246	0.0330901	0.110865	-0.0119464	-0.0135525	-0.11981	0.0795841	-0.0316014	-0.199205	-0.12785	-0.00188587	-0.0226209	-0.131268	0.0463771	-0.147103	0.0986319	-0.122372	-0.0635273	0.205966	0.166236	0.0622997	-0.104544	0.0230464	-0.0726866	0.235422	-0.0452788	0.0599502	-0.284576	0.154564	-0.15024	0.179118	-0.122496	0.0570845	0.359703	0.0749431	0.0442857	0.164392	0.0207835	-0.0414085	0.0487781	8.7074e-15	-0.0529701	-0.0935801	0.0574697	0.00281889	-0.130986	0.0970841	-0.115351
[truncated: 53 more columns]
