# Supplementary material for: Quantifying biological carbon pump pathways with a data-constrained mechanistic model ensemble approach
Source: Copernicus journal article supplement (doi:10.5194/bg-2022-7), 2022-02-07
Supplement: Supplementary file 7 [file Supp Table 7.xlsx]

## Sheet: Sheet1
Parameter	Value	Description
εNO3up	-5	Isotopic fractionation associated with nitrate uptake
εNH4up	-10	Isotopic fractionation associated with ammonium uptake
εExu	0	Isotopic fractionation associated with exudation
εZSexc	-1	Isotopic fractionation associated with excretion by small zooplankton (protists)
εZLexc	-5	Isotopic fractionation associated with excretion by large zooplankton (<1-mm mesozooplankton)
εZPexc	-5	Isotopic fractionation associated with excretion by predatory zooplankton (>1-mm mesozooplankton)
εZSeg	-1	Isotopic fractionation associated with egestion by small zooplankton (protists)
εZLeg	-2	Isotopic fractionation associated with egestion by large zooplankton (<1-mm mesozooplankton)
εZPeg	-2	Isotopic fractionation associated with egestion by predatory zooplankton (>1-mm mesozooplankton)
εNit	-14	Isotopic fractionation associated with nitrification
εP2D	-1	Isotopic fractionation associated with remineralization of PON to DON
εP2N	-1	Isotopic fractionation associated with remineralization of PON to NH4
εD2N	-1	Isotopic fractionation associated with remineralization of DON to NH4
εD2R	2	Isotopic fractionation associated with remineralization of DON to refractory DON
